# Supplementary material for: Reduced B cell frequencies in cord blood of HIV-exposed uninfected infants: an immunological and transcriptomic analysis
Source: Front Immunol. 2024 Sep 4;15:1445239. doi: 10.3389/fimmu.2024.1445239 (PMC11408218; doi:10.3389/fimmu.2024.1445239)
Supplement: Supplementary file 2 [file Table1.xlsx]

## Sheet: Table S1
Table S1. Summary of participants' clinical information in this study.
ParticipantID	MaternalAge (years)	BirthWeight (g)	InfantGender	Gestation (weeks)	Group
P005	25	3315	Female	38	HEU
P006	32	3185	Female	39	HEU
P007	35	3140	Male	38	HEU
P008	29	3590	Male	38.8571	HEU
P009	37	3520	Male	39.5714	HEU
P010	26	3330	Male	38.5714	HEU
P012	35	2810	Female	38	HEU
P013	27	3730	Female	39.1429	HEU
P014	31	3110	Male	38	HEU
P051	33	2920	Female	38.8571	HUU
P052	36	3760	Male	38.8571	HUU
P053	31	3890	Female	40	HUU
P054	34	3480	Male	38.5714	HUU
P055	30	2970	Female	38.8571	HUU
P056	32	3330	Male	38.5714	HUU
P057	31	4120	Male	38.5714	HUU
P058	34	3900	Female	38.4286	HUU
P059	32	2660	Female	38.8571	HUU
P060	34	3410	Female	39	HUU
P061	28	3320	Male	38.5714	HUU
P062	38	3510	Male	38.5714	HUU
P063	35	3390	Male	38.2857	HUU
P064	29	4020	Male	40.5714	HUU
P065	29	3190	Female	38.5714	HUU
P066	32	3110	Female	38.5714	HUU
P067	28	2760	Female	39.2857	HUU
P069	28	3000	Female	38.5714	HUU
P070	29	3640	Male	38.5714	HUU
P071	30	3340	Male	38.8571	HUU
P075	28	3200	Male	40	HUU
P076	30	3690	Female	38.5714	HUU
P077	30	3310	Male	38.5714	HUU
P078	31	3700	Female	38.7143	HUU

## Sheet: Table S2
Table S2. Overview of the blood samples with immunophenotypic data and RNA-seq data in this study.
ParticipantID	Flow cytometry			RNA-seq
	Umbilical cord blood	Maternal venous blood	Infant venous blood	Umbilical cord blood	Maternal venous blood	Infant venous blood
P005	Yes	Yes	Yes	Yes	Yes	Yes
P006	Yes	Yes	Yes	Yes	Yes	Yes
P007	Yes	Yes	Yes	Yes	Yes	Yes
P008	Yes	Yes	Yes	Yes	Yes	Yes
P009	Yes	Yes	Yes	No	No	No
P010	Yes	Yes	Yes	No	No	No
P012	Yes	Yes	Yes	No	No	No
P013	Yes	Yes	Yes	No	No	No
P014	Yes	Yes	Yes	No	No	No
P051	Yes	Yes	No	No	No	No
P052	Yes	Yes	No	No	No	No
P053	Yes	Yes	No	Yes	Yes	No
P054	Yes	Yes	No	Yes	Yes	No
P055	Yes	Yes	No	Yes	Yes	No
P056	Yes	Yes	No	Yes	Yes	No
P057	Yes	Yes	No	Yes	Yes	No
P058	Yes	Yes	No	Yes	Yes	No
P059	Yes	Yes	No	Yes	Yes	No
P060	Yes	Yes	No	Yes	Yes	No
P061	Yes	Yes	No	Yes	Yes	No
P062	No	No	No	Yes	Yes	No
P063	No	No	No	Yes	Yes	No
P064	No	No	No	Yes	Yes	No
P065	Yes	Yes	No	Yes	Yes	No
P066	No	No	No	Yes	Yes	No
P067	No	No	No	Yes	Yes	No
P069	Yes	Yes	No	No	No	No
P070	Yes	Yes	No	No	No	No
P071	Yes	Yes	No	No	No	No
P075	Yes	Yes	No	No	No	No
P076	Yes	Yes	No	No	No	No
P077	Yes	Yes	No	No	No	No
P078	Yes	Yes	No	No	No	No

## Sheet: Table S3
Table S3. List of Antibodies used in flow cytometry.
Reagent name	Fluorescein	Art.No.
CD3	APC	A07748
CD19	FITC	A07768
CD16	PE	A07766
CD56	PE	A07788
CD14	PC5	A07765
HLA-DR	ECD	B92438
CD45	KO	B36294
CD3	ECD	A07748
CD4	APC	IM2468
CD8	PC7	6607102
CD45RA	FITC	A07786
CCR7	PE	B30632
CD25	PC5	IM2646
CD127	PE	IM1980U
Microsphere kit for absolute counting		7547053
Manufacturer		Beckman Coulter

## Sheet: Table S4
Table S4. Summary of antibody expression across 17 immune cell types in flow cytometry.
Name	Abbr.	Antibody expression	Denominator
T cells	T.	CD3+	Lymphocyte
T helper cells	TH.	CD3+CD4+	Lymphocyte
Cytotoxic T cell	CTL.	CD3+CD8+	Lymphocyte
Tegulatory T cell	Treg.	CD3+CD4+CD25+CD127-	CD4+ T
Naïve CD4+ T cells	TH.N.	CD3+CD4+CD45RA+CCR7+	CD4+ T
Central memory CD4+ T cells	TH.CM.	CD3+CD4+CD45RA-CCR7+	CD4+ T
Effector CD4+ T cells	TH.E.	CD3+CD4+CD45RA+CCR7-	CD4+ T
Effector memory CD4+ T cells	TH.EM.	CD3+CD4+CD45RA-CCR7-	CD4+ T
Naïve CD8+ T cells	TC.N.	CD3+CD8+CD45RA+CCR7+	CD8+ T
Central memory CD8+ T cells	TC.CM.	CD3+CD8+CD45RA-CCR7+	CD8+ T
Effector CD8+ T cells	TC.E.	CD3+CD8+CD45RA+CCR7-	CD8+ T
Effector memory CD8+ T cells	TC.EM.	CD3+CD8+CD45RA-CCR7-	CD8+ T
Mononuclear cells	MONO.	CD3-CD14+	Karyocyte
B cells	B.	CD3-CD19+	Lymphocyte
Natural killer cells	NK.	CD3-CD16+CD56+	Lymphocyte
Natural killer T cells	NKT.	CD3+CD56+	Lymphocyte
Dendritic cells	DC.	CD3-CD14-CD56-CD19-HLA-DR+	Karyocyte

## Sheet: Table S5
Table S5. Sequencing statistics of RNA-seq in this study.
SampleID	ParticipantID	Aligned Reads	Raw Reads	% Alignment Rate
P005_C	P005	68425015	69160850	98.9361
P005_M	P005	80213555	81345810	98.6081
P006_C	P006	70319777	71087404	98.9202
P006_M	P006	68392421	69223526	98.7994
P007_C	P007	68604294	69394770	98.8609
P007_M	P007	66549479	67247462	98.9621
P008_C	P008	79623877	80380276	99.059
P008_M	P008	69257200	70044120	98.8765
P053_C	P053	74088306	74690746	99.1934
P053_M	P053	72967758	73622902	99.1101
P054_C	P054	85463065	85986774	99.3909
P054_M	P054	68449712	68963534	99.2549
P055_C	P055	72853315	73785682	98.7364
P055_M	P055	66093618	67169754	98.3979
P056_C	P056	67658974	68462108	98.8269
P056_M	P056	72508652	73502060	98.6485
P057_C	P057	73199735	74119922	98.7585
P057_M	P057	71414341	72343882	98.7151
P058_C	P058	66949695	67848164	98.6758
P058_M	P058	68264262	69239952	98.5909
P059_C	P059	68335103	69285388	98.6284
P059_M	P059	70046753	71118870	98.4925
P060_C	P060	75338073	76401458	98.6082
P060_M	P060	69059667	69983588	98.6798
P061_C	P061	73414372	74327840	98.771
P061_M	P061	68714633	69545914	98.8047
P062_C	P062	77661003	78390352	99.0696
P062_M	P062	68660714	69389914	98.9491
P063_C	P063	69399532	69955674	99.205
P063_M	P063	67971007	68656112	99.0021
P064_C	P064	70084943	70835490	98.9404
P064_M	P064	68574673	69574892	98.5624
P065_C	P065	81605668	82284552	99.175
P065_M	P065	66870165	67578390	98.952
P066_C	P066	67774315	68408840	99.0725
P066_M	P066	79524579	80419178	98.8876
P067_C	P067	67993345	69681140	97.5778
P067_M	P067	69269975	69991706	98.9688

## Sheet: Table S6
Table S6. Differentially expressed genes (DEGs) in cord blood compared with maternal venous blood (C vs M) in HEU group
Ensembl	Symbol	Type	baseMean	log2FoldChange	lfcSE	stat	pvalue	padj
ENSG00000117228	GBP1	protein_coding	1490.46	-3.51177	0.148788	-23.6026	3.63e-123	9.36e-119
ENSG00000154451	GBP5	protein_coding	2713.86	-3.27904	0.14277	-22.9672	9.91e-117	1.28e-112
ENSG00000239920	ENSG00000239920	protein_coding	114.28	6.11534	0.284425	21.5007	1.53e-102	1.32e-98
ENSG00000173114	LRRN3	protein_coding	600.146	3.37882	0.164485	20.5419	9.1e-94	5.87e-90
ENSG00000178538	CA8	protein_coding	74.9305	4.90446	0.24091	20.358	3.94e-92	2.03e-88
ENSG00000173894	CBX2	protein_coding	50.7173	4.01588	0.198748	20.2059	8.68e-91	3.73e-87
ENSG00000110090	CPT1A	protein_coding	540.392	-2.49255	0.125077	-19.9282	2.32e-88	8.54e-85
ENSG00000124256	ZBP1	protein_coding	598.322	-2.38582	0.123716	-19.2847	7.22e-83	2.33e-79
ENSG00000115415	STAT1	protein_coding	4481.81	-2.04994	0.108079	-18.967	3.2e-80	9.16e-77
ENSG00000236320	SLFN14	protein_coding	428.645	3.57403	0.189913	18.8193	5.25e-79	1.35e-75
ENSG00000284931	ENSG00000284931	protein_coding	23544.5	7.64635	0.413961	18.4712	3.52e-76	8.26e-73
ENSG00000233056	ERVH48-1	protein_coding	35.5966	5.09846	0.276685	18.4269	7.99e-76	1.72e-72
ENSG00000163520	FBLN2	protein_coding	109.927	3.37989	0.185217	18.2483	2.14e-74	4.24e-71
ENSG00000160791	CCR5	protein_coding	263.311	-3.08298	0.171497	-17.9769	2.96e-72	5.45e-69
ENSG00000185880	TRIM69	protein_coding	626.425	-1.26797	0.0713351	-17.7748	1.11e-70	1.91e-67
ENSG00000197465	GYPE	protein_coding	82.9828	3.73457	0.216014	17.2885	5.74e-67	9.25e-64
ENSG00000004799	PDK4	protein_coding	197.233	-3.50877	0.204381	-17.1678	4.63e-66	7.02e-63
ENSG00000163751	CPA3	protein_coding	61.1385	3.5263	0.20632	17.0914	1.72e-65	2.46e-62
ENSG00000112077	RHAG	protein_coding	215.711	4.34546	0.255241	17.0249	5.37e-65	7.29e-62
ENSG00000168646	AXIN2	protein_coding	102.163	2.19229	0.129581	16.9183	3.3e-64	4.25e-61
ENSG00000221963	APOL6	protein_coding	1653.66	-1.83735	0.109568	-16.769	4.11e-63	5.05e-60
ENSG00000187997	C17orf99	protein_coding	192.642	4.38491	0.261982	16.7375	6.99e-63	8.19e-60
ENSG00000128335	APOL2	protein_coding	1378.14	-1.62615	0.0977909	-16.6289	4.31e-62	4.83e-59
ENSG00000163554	SPTA1	protein_coding	537.366	3.94757	0.238273	16.5675	1.2e-61	1.29e-58
ENSG00000162654	GBP4	protein_coding	1088.34	-2.36729	0.144245	-16.4115	1.58e-60	1.63e-57
ENSG00000250361	GYPB	protein_coding	1869.1	4.22068	0.260246	16.218	3.76e-59	3.73e-56
ENSG00000225783	MIAT	lncRNA	508.406	-2.87465	0.179457	-16.0186	9.48e-58	9e-55
ENSG00000152078	TLCD4	protein_coding	402.017	3.87322	0.241823	16.0167	9.77e-58	9e-55
ENSG00000026751	SLAMF7	protein_coding	629.689	-2.51853	0.157634	-15.9771	1.85e-57	1.64e-54
ENSG00000130227	XPO7	protein_coding	3114.68	2.46983	0.155249	15.9088	5.51e-57	4.73e-54
ENSG00000008283	CYB561	protein_coding	167.229	-2.33813	0.147094	-15.8955	6.81e-57	5.66e-54
ENSG00000138496	PARP9	protein_coding	1875.44	-1.67335	0.105472	-15.8653	1.1e-56	8.88e-54
ENSG00000117632	STMN1	protein_coding	569.118	1.97178	0.127321	15.4867	4.27e-54	3.33e-51
ENSG00000109956	B3GAT1	protein_coding	114.405	-6.79642	0.440063	-15.4442	8.25e-54	6.26e-51
ENSG00000038945	MSR1	protein_coding	112.592	-2.93306	0.190129	-15.4267	1.08e-53	7.98e-51
ENSG00000162645	GBP2	protein_coding	4725.05	-1.84551	0.120245	-15.3478	3.66e-53	2.62e-50
ENSG00000140287	HDC	protein_coding	85.6044	4.17782	0.272754	15.3171	5.87e-53	4.09e-50
ENSG00000117643	MAN1C1	protein_coding	293.948	1.46141	0.0961216	15.2038	3.34e-52	2.26e-49
ENSG00000211890	IGHA2	IG_C_gene	261.713	-7.4249	0.48973	-15.1612	6.39e-52	4.22e-49
ENSG00000122644	ARL4A	protein_coding	664.359	3.34624	0.221218	15.1264	1.08e-51	6.99e-49
ENSG00000211895	IGHA1	IG_C_gene	746.047	-6.31838	0.419283	-15.0695	2.57e-51	1.62e-48
ENSG00000026950	BTN3A1	protein_coding	2149.32	-1.40955	0.0940939	-14.9803	9.88e-51	6.07e-48
ENSG00000198915	RASGEF1A	protein_coding	66.5114	-2.13525	0.142563	-14.9776	1.03e-50	6.17e-48
ENSG00000179348	GATA2	protein_coding	122.965	3.05565	0.20439	14.9501	1.56e-50	9.12e-48
ENSG00000136929	HEMGN	protein_coding	4603.04	3.82333	0.25881	14.7727	2.2e-49	1.26e-46
ENSG00000116675	DNAJC6	protein_coding	258.559	4.08723	0.277053	14.7525	2.96e-49	1.66e-46
ENSG00000154114	TBCEL	protein_coding	576.254	2.66918	0.181005	14.7464	3.24e-49	1.78e-46
ENSG00000110693	SOX6	protein_coding	257.3	3.19751	0.217676	14.6893	7.55e-49	4.06e-46
ENSG00000136231	IGF2BP3	protein_coding	64.2641	2.84795	0.194004	14.6799	8.67e-49	4.56e-46
ENSG00000064886	CHI3L2	protein_coding	309.43	2.13205	0.145534	14.6498	1.35e-48	6.97e-46
ENSG00000034713	GABARAPL2	protein_coding	3938.26	2.29991	0.157317	14.6196	2.11e-48	1.07e-45
ENSG00000117318	ID3	protein_coding	194.489	1.8651	0.127932	14.5788	3.83e-48	1.9e-45
ENSG00000178607	ERN1	protein_coding	599.2	-1.63162	0.112063	-14.5598	5.06e-48	2.46e-45
ENSG00000156298	TSPAN7	protein_coding	135.711	3.51049	0.241388	14.5429	6.48e-48	3.09e-45
ENSG00000272168	CASC15	lncRNA	26.6712	3.67057	0.255315	14.3766	7.26e-47	3.4e-44
ENSG00000141664	ZCCHC2	protein_coding	617.663	-1.76719	0.123072	-14.3589	9.37e-47	4.31e-44
ENSG00000156475	PPP2R2B	protein_coding	57.5027	-3.87049	0.269873	-14.3419	1.2e-46	5.42e-44
ENSG00000170180	GYPA	protein_coding	624.319	5.40015	0.376924	14.3269	1.49e-46	6.61e-44
ENSG00000204010	IFIT1B	protein_coding	4331.44	3.75936	0.263183	14.2842	2.75e-46	1.2e-43
ENSG00000183691	NOG	protein_coding	150.893	2.53488	0.178302	14.2168	7.21e-46	3.1e-43
ENSG00000257275	ENSG00000257275	lncRNA	53.9458	3.51092	0.247189	14.2034	8.73e-46	3.69e-43
ENSG00000170581	STAT2	protein_coding	1833.33	-1.24876	0.0884755	-14.1142	3.11e-45	1.29e-42
ENSG00000162909	CAPN2	protein_coding	1456.43	-0.968958	0.0687922	-14.0853	4.68e-45	1.91e-42
ENSG00000211893	IGHG2	IG_C_gene	374.853	-4.88011	0.347335	-14.0502	7.69e-45	3.1e-42
ENSG00000125347	IRF1	protein_coding	4162.85	-1.43779	0.102674	-14.0035	1.48e-44	5.89e-42
ENSG00000089692	LAG3	protein_coding	60.7386	-4.83988	0.347895	-13.9119	5.36e-44	2.1e-41
ENSG00000181704	YIPF6	protein_coding	907.857	2.20863	0.158887	13.9006	6.28e-44	2.42e-41
ENSG00000172331	BPGM	protein_coding	15860.2	3.68296	0.265606	13.8663	1.01e-43	3.85e-41
ENSG00000135631	RAB11FIP5	protein_coding	72.1657	-3.4925	0.252106	-13.8533	1.21e-43	4.54e-41
ENSG00000100450	GZMH	protein_coding	766.535	-3.86497	0.279072	-13.8493	1.28e-43	4.73e-41
ENSG00000135045	C9orf40	protein_coding	279.993	2.10212	0.152547	13.7801	3.36e-43	1.22e-40
ENSG00000136999	CCN3	protein_coding	59.7684	-2.78049	0.201866	-13.7739	3.66e-43	1.31e-40
ENSG00000166171	DPCD	protein_coding	350.808	2.95943	0.214956	13.7676	3.99e-43	1.41e-40
ENSG00000013561	RNF14	protein_coding	925.626	2.28541	0.166139	13.756	4.69e-43	1.63e-40
ENSG00000100342	APOL1	protein_coding	720.413	-2.44894	0.178081	-13.7518	4.97e-43	1.71e-40
ENSG00000123091	RNF11	protein_coding	4645.49	2.78577	0.202721	13.7419	5.7e-43	1.93e-40
ENSG00000178537	SLC25A20	protein_coding	320.571	-1.33692	0.097651	-13.6907	1.15e-42	3.86e-40
ENSG00000123453	SARDH	protein_coding	79.1303	2.92335	0.21394	13.6643	1.66e-42	5.48e-40
ENSG00000119917	IFIT3	protein_coding	2551.59	-2.83443	0.207453	-13.663	1.69e-42	5.51e-40
ENSG00000002549	LAP3	protein_coding	995.965	-1.72676	0.126559	-13.6439	2.2e-42	7.08e-40
ENSG00000115956	PLEK	protein_coding	4300.13	-1.00739	0.0739773	-13.6176	3.15e-42	1e-39
ENSG00000152484	USP12	protein_coding	2642.67	2.94344	0.216294	13.6085	3.56e-42	1.12e-39
ENSG00000196549	MME	protein_coding	2454.28	-2.59828	0.191186	-13.5903	4.57e-42	1.42e-39
ENSG00000042062	RIPOR3	protein_coding	258.888	2.97538	0.219217	13.5727	5.81e-42	1.78e-39
ENSG00000173848	NET1	protein_coding	137.195	1.82981	0.135091	13.545	8.49e-42	2.57e-39
ENSG00000224616	RTCA-AS1	lncRNA	140.241	2.34009	0.172804	13.5418	8.86e-42	2.66e-39
ENSG00000165661	QSOX2	protein_coding	351.149	1.57842	0.116854	13.5077	1.41e-41	4.18e-39
ENSG00000163840	DTX3L	protein_coding	1543.76	-1.45016	0.107596	-13.4778	2.11e-41	6.2e-39
ENSG00000266412	NCOA4	protein_coding	37514.8	2.49857	0.185582	13.4635	2.57e-41	7.44e-39
ENSG00000151623	NR3C2	protein_coding	28.3001	-3.748	0.27872	-13.4472	3.2e-41	9.16e-39
ENSG00000104765	BNIP3L	protein_coding	16088.3	2.8927	0.215131	13.4462	3.24e-41	9.19e-39
ENSG00000161921	CXCL16	protein_coding	635.515	-1.65036	0.122894	-13.4291	4.08e-41	1.14e-38
ENSG00000189233	NUGGC	protein_coding	26.4654	-4.41586	0.329075	-13.419	4.68e-41	1.3e-38
ENSG00000139116	KIF21A	protein_coding	37.8256	-4.50653	0.336544	-13.3906	6.86e-41	1.88e-38
ENSG00000143119	CD53	protein_coding	6851.65	-0.912351	0.0681398	-13.3894	6.97e-41	1.89e-38
ENSG00000197182	MIRLET7BHG	lncRNA	31.108	-3.50733	0.261971	-13.3882	7.08e-41	1.9e-38
ENSG00000132718	SYT11	protein_coding	218.456	-1.63985	0.122633	-13.3719	8.82e-41	2.35e-38
ENSG00000100387	RBX1	protein_coding	964.782	2.23718	0.168187	13.3017	2.26e-40	5.95e-38
ENSG00000287166	ENSG00000287166	lncRNA	31.4941	3.13553	0.235916	13.2909	2.61e-40	6.81e-38
ENSG00000167815	PRDX2	protein_coding	4197.29	3.04893	0.229479	13.2863	2.78e-40	7.17e-38
ENSG00000255571	MIR9-3HG	lncRNA	30.6803	-3.06604	0.230814	-13.2836	2.88e-40	7.36e-38
ENSG00000172215	CXCR6	protein_coding	65.5942	-3.59471	0.271257	-13.2521	4.39e-40	1.11e-37
ENSG00000259986	ENSG00000259986	lncRNA	20.108	3.7288	0.282534	13.1977	9.04e-40	2.26e-37
ENSG00000162337	LRP5	protein_coding	40.1818	2.34738	0.177915	13.1938	9.52e-40	2.36e-37
ENSG00000180667	YOD1	protein_coding	1844.49	2.75748	0.209315	13.1738	1.24e-39	3.05e-37
ENSG00000163568	AIM2	protein_coding	194.081	-2.71118	0.205819	-13.1726	1.26e-39	3.07e-37
ENSG00000253276	CCDC71L	protein_coding	366.303	-1.30261	0.0993792	-13.1075	2.98e-39	7.19e-37
ENSG00000204267	TAP2	protein_coding	808.65	-1.40043	0.107115	-13.0741	4.63e-39	1.11e-36
ENSG00000121570	DPPA4	protein_coding	28.0512	3.7881	0.290313	13.0483	6.5e-39	1.54e-36
ENSG00000169877	AHSP	protein_coding	7274.09	3.29591	0.253276	13.0131	1.03e-38	2.42e-36
ENSG00000160117	ANKLE1	protein_coding	80.1654	2.48648	0.191286	12.9988	1.24e-38	2.89e-36
ENSG00000137210	TMEM14B	protein_coding	397.03	1.88936	0.145412	12.9931	1.34e-38	3.08e-36
ENSG00000198336	MYL4	protein_coding	4678.92	2.942	0.226512	12.9883	1.43e-38	3.25e-36
ENSG00000082458	DLG3	protein_coding	66.565	-1.9179	0.148071	-12.9526	2.27e-38	5.14e-36
ENSG00000206337	HCP5	lncRNA	1849.93	-0.982443	0.0759242	-12.9398	2.68e-38	6.02e-36
ENSG00000100721	TCL1A	protein_coding	629.725	2.75616	0.213165	12.9297	3.06e-38	6.8e-36
ENSG00000007968	E2F2	protein_coding	1460.58	2.96775	0.229698	12.9202	3.46e-38	7.63e-36
ENSG00000196132	MYT1	protein_coding	25.7551	6.03319	0.467234	12.9126	3.82e-38	8.36e-36
ENSG00000135070	ISCA1	protein_coding	1310.64	2.23604	0.173215	12.909	4e-38	8.68e-36
ENSG00000114126	TFDP2	protein_coding	605.734	1.62586	0.12601	12.9026	4.35e-38	9.35e-36
ENSG00000138378	STAT4	protein_coding	358.835	-1.68642	0.131142	-12.8595	7.6e-38	1.62e-35
ENSG00000119922	IFIT2	protein_coding	2887.07	-2.45388	0.191634	-12.805	1.54e-37	3.25e-35
ENSG00000102796	DHRS12	protein_coding	167.123	-1.87652	0.146812	-12.7818	2.07e-37	4.35e-35
ENSG00000164649	CDCA7L	protein_coding	290.116	1.89383	0.148219	12.7773	2.2e-37	4.57e-35
ENSG00000287839	ENSG00000287839	lncRNA	186.781	-1.5449	0.120962	-12.7718	2.36e-37	4.86e-35
ENSG00000152894	PTPRK	protein_coding	59.2552	1.95289	0.152987	12.7651	2.57e-37	5.26e-35
ENSG00000225756	DBH-AS1	lncRNA	67.9252	3.30729	0.259634	12.7383	3.62e-37	7.35e-35
ENSG00000167244	IGF2	protein_coding	237.095	5.64078	0.44426	12.697	6.14e-37	1.23e-34
ENSG00000197093	GAL3ST4	protein_coding	152.029	1.99895	0.157439	12.6967	6.17e-37	1.23e-34
ENSG00000158966	CACHD1	protein_coding	34.3122	2.50453	0.197497	12.6813	7.5e-37	1.49e-34
ENSG00000088986	DYNLL1	protein_coding	1414.53	1.65251	0.130379	12.6747	8.17e-37	1.61e-34
ENSG00000117724	CENPF	protein_coding	77.2513	1.96456	0.155052	12.6703	8.64e-37	1.69e-34
ENSG00000114948	ADAM23	protein_coding	44.4539	2.50146	0.197742	12.6501	1.12e-36	2.17e-34
ENSG00000203709	MIR29B2CHG	lncRNA	259.655	-2.13522	0.168928	-12.6398	1.27e-36	2.45e-34
ENSG00000066926	FECH	protein_coding	5762.99	2.92177	0.2315	12.621	1.62e-36	3.07e-34
ENSG00000137460	FHDC1	protein_coding	204.676	2.61151	0.20692	12.6209	1.62e-36	3.07e-34
ENSG00000188672	RHCE	protein_coding	195.652	3.5309	0.279951	12.6126	1.8e-36	3.39e-34
ENSG00000140105	WARS1	protein_coding	2809.34	-1.77312	0.140613	-12.6099	1.86e-36	3.48e-34
ENSG00000119866	BCL11A	protein_coding	227.109	1.28831	0.10238	12.5836	2.6e-36	4.82e-34
ENSG00000173926	MARCHF3	protein_coding	178.976	2.35929	0.18756	12.5789	2.76e-36	5.08e-34
ENSG00000181036	FCRL6	protein_coding	278.245	-3.10516	0.247039	-12.5695	3.11e-36	5.68e-34
ENSG00000140526	ABHD2	protein_coding	1918.9	-1.61162	0.128352	-12.5563	3.67e-36	6.67e-34
ENSG00000137959	IFI44L	protein_coding	499.607	-3.12258	0.24896	-12.5425	4.37e-36	7.88e-34
ENSG00000246705	H2AJ	protein_coding	688.213	1.92478	0.153633	12.5285	5.22e-36	9.34e-34
ENSG00000198919	DZIP3	protein_coding	160.669	1.54507	0.12341	12.5198	5.82e-36	1.03e-33
ENSG00000111331	OAS3	protein_coding	1066.31	-2.31699	0.185323	-12.5025	7.24e-36	1.28e-33
ENSG00000197057	DTHD1	protein_coding	63.8965	-3.78091	0.302609	-12.4943	8.02e-36	1.41e-33
ENSG00000166946	CCNDBP1	protein_coding	6189.4	1.91692	0.153806	12.4632	1.19e-35	2.07e-33
ENSG00000100490	CDKL1	protein_coding	313.626	1.98686	0.159474	12.4588	1.25e-35	2.17e-33
ENSG00000095637	SORBS1	protein_coding	40.2048	2.88403	0.231989	12.4318	1.76e-35	3.02e-33
ENSG00000166848	TERF2IP	protein_coding	3081.13	1.89039	0.152817	12.3703	3.78e-35	6.46e-33
ENSG00000138166	DUSP5	protein_coding	98.325	-2.19701	0.177645	-12.3674	3.92e-35	6.65e-33
ENSG00000168016	TRANK1	protein_coding	1983.87	-1.49604	0.121109	-12.3529	4.7e-35	7.92e-33
ENSG00000235770	LINC00607	lncRNA	26.2217	4.79375	0.388373	12.3432	5.3e-35	8.88e-33
ENSG00000145354	CISD2	protein_coding	1416.62	2.79922	0.226861	12.3389	5.59e-35	9.3e-33
ENSG00000109854	HTATIP2	protein_coding	446.132	-1.12926	0.0915289	-12.3377	5.67e-35	9.38e-33
ENSG00000124225	PMEPA1	protein_coding	69.132	2.01638	0.163619	12.3237	6.75e-35	1.11e-32
ENSG00000126088	UROD	protein_coding	1247.11	2.35197	0.190866	12.3226	6.84e-35	1.12e-32
ENSG00000135148	TRAFD1	protein_coding	1197.56	-0.948624	0.0772976	-12.2724	1.27e-34	2.07e-32
ENSG00000186591	UBE2H	protein_coding	4864.18	2.15138	0.175459	12.2614	1.46e-34	2.35e-32
ENSG00000286055	ENSG00000286055	lncRNA	41.5478	3.49269	0.285014	12.2545	1.59e-34	2.55e-32
ENSG00000204103	MAFB	protein_coding	401.472	-1.57211	0.12863	-12.222	2.37e-34	3.78e-32
ENSG00000132274	TRIM22	protein_coding	2932.34	-1.62558	0.133059	-12.217	2.52e-34	3.99e-32
ENSG00000260629	BGLT3	lncRNA	11.6653	7.34454	0.601256	12.2153	2.57e-34	4.05e-32
ENSG00000167483	NIBAN3	protein_coding	733.878	1.95661	0.160205	12.2132	2.64e-34	4.13e-32
ENSG00000133477	FAM83F	protein_coding	23.1421	3.17212	0.259957	12.2025	3.01e-34	4.68e-32
ENSG00000135114	OASL	protein_coding	595.679	-2.81945	0.231296	-12.1898	3.52e-34	5.44e-32
ENSG00000076043	REXO2	protein_coding	485.554	2.20581	0.181228	12.1715	4.41e-34	6.77e-32
ENSG00000205726	ITSN1	protein_coding	346.041	2.43849	0.200859	12.1403	6.46e-34	9.86e-32
ENSG00000124766	SOX4	protein_coding	172.964	1.70125	0.140207	12.1338	6.99e-34	1.06e-31
ENSG00000137965	IFI44	protein_coding	392.577	-3.20712	0.264827	-12.1102	9.32e-34	1.41e-31
ENSG00000101412	E2F1	protein_coding	119.44	1.99565	0.164848	12.106	9.82e-34	1.47e-31
ENSG00000168280	KIF5C	protein_coding	22.4222	-3.63193	0.300226	-12.0973	1.09e-33	1.63e-31
ENSG00000143224	PPOX	protein_coding	354.185	1.69568	0.140194	12.0952	1.12e-33	1.66e-31
ENSG00000135899	SP110	protein_coding	2034.35	-1.16416	0.0962675	-12.093	1.15e-33	1.7e-31
ENSG00000143479	DYRK3	protein_coding	183.495	2.99774	0.248124	12.0816	1.32e-33	1.94e-31
ENSG00000144354	CDCA7	protein_coding	77.0958	2.40539	0.199742	12.0425	2.12e-33	3.09e-31
ENSG00000112782	CLIC5	protein_coding	21.7829	-3.66733	0.305507	-12.0041	3.38e-33	4.88e-31
ENSG00000170074	FAM153A	protein_coding	36.961	-3.33604	0.277913	-12.0039	3.39e-33	4.88e-31
ENSG00000186184	POLR1D	protein_coding	2851.76	1.96279	0.163663	11.9929	3.87e-33	5.55e-31
ENSG00000112294	ALDH5A1	protein_coding	709.128	2.25051	0.188018	11.9697	5.12e-33	7.3e-31
ENSG00000265972	TXNIP	protein_coding	23767.9	-1.02024	0.0853152	-11.9585	5.86e-33	8.3e-31
ENSG00000278195	SSTR3	protein_coding	187.269	2.05079	0.171716	11.9429	7.07e-33	9.97e-31
ENSG00000178038	ALS2CL	protein_coding	146.413	1.93817	0.162581	11.9213	9.17e-33	1.29e-30
ENSG00000124191	TOX2	protein_coding	43.3883	2.26301	0.189961	11.913	1.01e-32	1.41e-30
ENSG00000088882	CPXM1	protein_coding	24.0277	3.54707	0.29779	11.9113	1.03e-32	1.43e-30
ENSG00000243156	MICAL3	protein_coding	142.243	1.64792	0.138516	11.897	1.23e-32	1.69e-30
ENSG00000177311	ZBTB38	protein_coding	216.788	-2.17186	0.18271	-11.8869	1.38e-32	1.9e-30
ENSG00000160785	SLC25A44	protein_coding	956.846	-1.23695	0.104152	-11.8764	1.57e-32	2.13e-30
ENSG00000161217	PCYT1A	protein_coding	975.602	-0.885537	0.0745627	-11.8764	1.57e-32	2.13e-30
ENSG00000136261	BZW2	protein_coding	242.567	1.16111	0.0979503	11.8541	2.05e-32	2.77e-30
ENSG00000266338	NBPF15	protein_coding	134.395	-1.73705	0.146697	-11.841	2.39e-32	3.22e-30
ENSG00000153574	RPIA	protein_coding	1459.84	1.97087	0.16645	11.8406	2.41e-32	3.22e-30
ENSG00000106771	TMEM245	protein_coding	736.572	1.72248	0.145686	11.8232	2.96e-32	3.94e-30
ENSG00000271503	CCL5	protein_coding	3476.72	-2.41267	0.204536	-11.7959	4.1e-32	5.42e-30
ENSG00000159023	EPB41	protein_coding	10573.8	1.97787	0.167751	11.7905	4.37e-32	5.75e-30
ENSG00000139323	POC1B	protein_coding	801.145	2.12441	0.180204	11.7889	4.45e-32	5.83e-30
ENSG00000112293	GPLD1	protein_coding	29.8345	2.57668	0.218973	11.7671	5.77e-32	7.51e-30
ENSG00000150687	PRSS23	protein_coding	128.369	-3.10801	0.264473	-11.7517	6.92e-32	8.97e-30
ENSG00000164176	EDIL3	protein_coding	112.971	5.66722	0.482922	11.7353	8.4e-32	1.08e-29
ENSG00000120158	RCL1	protein_coding	89.6304	1.13	0.0962976	11.7345	8.48e-32	1.09e-29
ENSG00000198892	SHISA4	protein_coding	39.868	-4.04719	0.345234	-11.723	9.71e-32	1.24e-29
ENSG00000138835	RGS3	protein_coding	688.138	-1.27935	0.109178	-11.718	1.03e-31	1.31e-29
ENSG00000173193	PARP14	protein_coding	2412.98	-1.62199	0.138432	-11.7169	1.04e-31	1.32e-29
ENSG00000172671	ZFAND4	protein_coding	208.861	1.64493	0.140445	11.7123	1.1e-31	1.39e-29
ENSG00000285509	TBCEL-TECTA	protein_coding	33.9901	3.19493	0.273118	11.698	1.31e-31	1.63e-29
ENSG00000198836	OPA1	protein_coding	1248.47	2.21818	0.190251	11.6592	2.06e-31	2.57e-29
ENSG00000253483	ENSG00000253483	processed_pseudogene	27.2362	3.86431	0.332044	11.638	2.64e-31	3.28e-29
ENSG00000164010	ERMAP	protein_coding	436.855	1.84306	0.158385	11.6366	2.69e-31	3.31e-29
ENSG00000196954	CASP4	protein_coding	2803.37	-1.25413	0.107815	-11.6322	2.83e-31	3.47e-29
ENSG00000197536	IRF1-AS1	lncRNA	256.267	-1.67282	0.143815	-11.6317	2.84e-31	3.48e-29
ENSG00000116663	FBXO6	protein_coding	109.188	-1.74241	0.150204	-11.6003	4.11e-31	4.99e-29
ENSG00000137752	CASP1	protein_coding	2740.66	-1.21876	0.105134	-11.5925	4.5e-31	5.45e-29
ENSG00000138646	HERC5	protein_coding	687.366	-2.75561	0.237812	-11.5873	4.78e-31	5.76e-29
ENSG00000115363	EVA1A	protein_coding	12.2565	5.09578	0.43985	11.5853	4.89e-31	5.87e-29
ENSG00000057935	MTA3	protein_coding	172.914	1.3499	0.116629	11.5743	5.56e-31	6.64e-29
ENSG00000004846	ABCB5	protein_coding	15.107	5.26068	0.45463	11.5714	5.76e-31	6.84e-29
ENSG00000256269	HMBS	protein_coding	1548.4	2.80467	0.242389	11.571	5.78e-31	6.84e-29
ENSG00000121691	CAT	protein_coding	5229.64	1.67257	0.144621	11.5652	6.18e-31	7.28e-29
ENSG00000155926	SLA	protein_coding	4116.43	-1.17827	0.101951	-11.5572	6.79e-31	7.96e-29
ENSG00000232021	LEF1-AS1	lncRNA	53.6572	2.3786	0.205852	11.5549	6.97e-31	8.13e-29
ENSG00000100612	DHRS7	protein_coding	1262.91	-1.05305	0.0912922	-11.5349	8.79e-31	1.02e-28
ENSG00000173801	JUP	protein_coding	293.147	2.05479	0.178237	11.5284	9.49e-31	1.1e-28
ENSG00000161381	PLXDC1	protein_coding	152.191	1.82973	0.158728	11.5275	9.59e-31	1.1e-28
ENSG00000169871	TRIM56	protein_coding	2217.63	-0.730852	0.0634873	-11.5118	1.15e-30	1.32e-28
ENSG00000168062	BATF2	protein_coding	92.6405	-3.25167	0.282478	-11.5113	1.16e-30	1.32e-28
ENSG00000106624	AEBP1	protein_coding	137.858	2.1821	0.189686	11.5037	1.26e-30	1.44e-28
ENSG00000204613	TRIM10	protein_coding	802.658	2.57843	0.22427	11.497	1.37e-30	1.54e-28
ENSG00000068878	PSME4	protein_coding	1745.06	1.63827	0.142555	11.4923	1.44e-30	1.63e-28
ENSG00000287860	ENSG00000287860	lncRNA	49.6792	3.32724	0.289559	11.4907	1.47e-30	1.65e-28
ENSG00000117322	CR2	protein_coding	114.742	2.11214	0.18387	11.4872	1.53e-30	1.71e-28
ENSG00000168394	TAP1	protein_coding	2750.87	-1.53824	0.133917	-11.4865	1.54e-30	1.71e-28
ENSG00000234518	PTGES3P1	processed_pseudogene	150.614	-1.25601	0.10955	-11.4652	1.97e-30	2.18e-28
ENSG00000057657	PRDM1	protein_coding	338.959	-1.69412	0.148048	-11.4431	2.55e-30	2.81e-28
ENSG00000155090	KLF10	protein_coding	237.618	-1.82062	0.159156	-11.4393	2.66e-30	2.92e-28
ENSG00000129355	CDKN2D	protein_coding	4151.3	1.91701	0.167783	11.4255	3.12e-30	3.41e-28
ENSG00000136514	RTP4	protein_coding	107.902	-1.15335	0.101175	-11.3995	4.2e-30	4.57e-28
ENSG00000138795	LEF1	protein_coding	1498.92	1.48902	0.130683	11.3942	4.47e-30	4.84e-28
ENSG00000148218	ALAD	protein_coding	857.393	1.2278	0.107791	11.3906	4.66e-30	5.03e-28
ENSG00000110881	ASIC1	protein_coding	42.4989	3.24316	0.284756	11.3893	4.73e-30	5.08e-28
ENSG00000153898	MCOLN2	protein_coding	62.016	-2.43083	0.213928	-11.3628	6.4e-30	6.85e-28
ENSG00000162543	UBXN10	protein_coding	61.3404	2.43549	0.214539	11.3522	7.23e-30	7.71e-28
ENSG00000088826	SMOX	protein_coding	2572.62	3.278	0.28917	11.3359	8.71e-30	9.25e-28
ENSG00000143502	SUSD4	protein_coding	64.2765	2.26227	0.199623	11.3327	9.03e-30	9.55e-28
ENSG00000090013	BLVRB	protein_coding	11306.4	2.52039	0.22273	11.3159	1.09e-29	1.15e-27
ENSG00000197442	MAP3K5	protein_coding	804.018	-1.18272	0.10457	-11.3103	1.17e-29	1.22e-27
ENSG00000214517	PPME1	protein_coding	406.51	1.67121	0.147833	11.3047	1.24e-29	1.3e-27
ENSG00000185339	TCN2	protein_coding	92.4008	-2.13272	0.188841	-11.2938	1.41e-29	1.47e-27
ENSG00000183486	MX2	protein_coding	3540.07	-1.53534	0.136051	-11.285	1.56e-29	1.61e-27
ENSG00000163508	EOMES	protein_coding	243.02	-1.93382	0.171387	-11.2834	1.59e-29	1.64e-27
ENSG00000173821	RNF213	protein_coding	5466.82	-1.33162	0.118037	-11.2814	1.62e-29	1.67e-27
ENSG00000263465	SRSF8	protein_coding	1205.64	1.65606	0.146801	11.281	1.63e-29	1.67e-27
ENSG00000113389	NPR3	protein_coding	23.9513	3.29436	0.29248	11.2636	1.99e-29	2.02e-27
ENSG00000059378	PARP12	protein_coding	749.378	-0.876515	0.0778286	-11.2621	2.02e-29	2.05e-27
ENSG00000111726	CMAS	protein_coding	662.342	1.97079	0.175033	11.2595	2.08e-29	2.1e-27
ENSG00000140853	NLRC5	protein_coding	2256.79	-1.03685	0.0921947	-11.2463	2.41e-29	2.43e-27
ENSG00000205683	DPF3	protein_coding	29.1813	2.08616	0.185506	11.2458	2.43e-29	2.44e-27
ENSG00000214113	LYRM4	protein_coding	132.096	1.14094	0.101662	11.2229	3.15e-29	3.15e-27
ENSG00000134539	KLRD1	protein_coding	716.063	-2.44054	0.217758	-11.2075	3.74e-29	3.73e-27
ENSG00000133056	PIK3C2B	protein_coding	250.767	1.03793	0.0926604	11.2014	4.01e-29	3.98e-27
ENSG00000151726	ACSL1	protein_coding	11281.6	-1.78895	0.159828	-11.193	4.41e-29	4.36e-27
ENSG00000144136	SLC20A1	protein_coding	836.964	-0.808284	0.0722762	-11.1833	4.92e-29	4.85e-27
ENSG00000115993	TRAK2	protein_coding	1736.51	1.85655	0.166055	11.1804	5.09e-29	4.99e-27
ENSG00000129472	RAB2B	protein_coding	1440.84	2.66651	0.238514	11.1797	5.13e-29	5.01e-27
ENSG00000228794	LINC01128	lncRNA	208.757	1.40298	0.125497	11.1794	5.15e-29	5.01e-27
ENSG00000132386	SERPINF1	protein_coding	150.033	1.62956	0.145826	11.1747	5.42e-29	5.26e-27
ENSG00000120217	CD274	protein_coding	172.868	-2.50254	0.224038	-11.1701	5.71e-29	5.52e-27
ENSG00000171408	PDE7B	protein_coding	18.2189	2.6954	0.241754	11.1493	7.21e-29	6.94e-27
ENSG00000096996	IL12RB1	protein_coding	414.592	-1.63256	0.146474	-11.1457	7.51e-29	7.2e-27
ENSG00000133106	EPSTI1	protein_coding	773.984	-1.90986	0.171461	-11.1387	8.13e-29	7.76e-27
ENSG00000158715	SLC45A3	protein_coding	63.133	2.1343	0.191621	11.1381	8.18e-29	7.79e-27
ENSG00000175061	SNHG29	lncRNA	1352.84	1.40885	0.126598	11.1286	9.11e-29	8.63e-27
ENSG00000111801	BTN3A3	protein_coding	886.676	-1.13885	0.102388	-11.1229	9.7e-29	9.17e-27
ENSG00000282851	BISPR	lncRNA	130.269	-1.0912	0.0981409	-11.1187	1.02e-28	9.58e-27
ENSG00000290577	ENSG00000290577	lncRNA	76.5423	1.73923	0.156682	11.1004	1.25e-28	1.17e-26
ENSG00000158481	CD1C	protein_coding	211.9	1.5397	0.138753	11.0967	1.3e-28	1.22e-26
ENSG00000197312	DDI2	protein_coding	554.855	1.17929	0.106295	11.0944	1.33e-28	1.24e-26
ENSG00000289731	FAM153B	lncRNA	22.7554	-3.7469	0.337775	-11.0929	1.36e-28	1.26e-26
ENSG00000287632	ENSG00000287632	lncRNA	114.236	2.76466	0.249324	11.0886	1.42e-28	1.32e-26
ENSG00000166793	YPEL4	protein_coding	219.317	2.9007	0.261732	11.0827	1.52e-28	1.4e-26
ENSG00000157551	KCNJ15	protein_coding	3125.24	-1.61876	0.146372	-11.0592	1.98e-28	1.82e-26
ENSG00000165209	STRBP	protein_coding	196.961	1.44404	0.130669	11.0512	2.16e-28	1.98e-26
ENSG00000143727	ACP1	protein_coding	1334.12	1.62603	0.14723	11.0441	2.34e-28	2.13e-26
ENSG00000150337	FCGR1A	protein_coding	792.103	-1.99855	0.181144	-11.0329	2.65e-28	2.41e-26
ENSG00000177868	SVBP	protein_coding	142.75	1.54456	0.140017	11.0313	2.7e-28	2.44e-26
ENSG00000047597	XK	protein_coding	1811.93	2.72652	0.247209	11.0292	2.76e-28	2.49e-26
ENSG00000196586	MYO6	protein_coding	25.0914	-3.47207	0.316272	-10.9781	4.87e-28	4.38e-26
ENSG00000135144	DTX1	protein_coding	134.544	1.83805	0.167589	10.9676	5.47e-28	4.9e-26
ENSG00000164398	ACSL6	protein_coding	267.521	2.37055	0.216512	10.9488	6.73e-28	6.01e-26
ENSG00000078596	ITM2A	protein_coding	686.209	1.44341	0.132072	10.9289	8.38e-28	7.45e-26
ENSG00000289536	ENSG00000289536	lncRNA	14.4179	4.21996	0.386206	10.9267	8.59e-28	7.61e-26
ENSG00000101052	IFT52	protein_coding	289.681	1.42679	0.130611	10.9239	8.86e-28	7.83e-26
ENSG00000236901	MIR600HG	lncRNA	135.835	1.54813	0.141763	10.9205	9.2e-28	8.1e-26
ENSG00000123130	ACOT9	protein_coding	507.021	-0.946337	0.0867283	-10.9115	1.02e-27	8.91e-26
ENSG00000150961	SEC24D	protein_coding	289.423	-1.0599	0.0971388	-10.9112	1.02e-27	8.91e-26
ENSG00000123454	DBH	protein_coding	23.9337	3.09983	0.284176	10.9081	1.05e-27	9.19e-26
ENSG00000103647	CORO2B	protein_coding	35.2597	2.86078	0.26231	10.9061	1.08e-27	9.36e-26
ENSG00000163162	RNF149	protein_coding	5591.76	-1.33283	0.122424	-10.887	1.33e-27	1.15e-25
ENSG00000116667	C1orf21	protein_coding	148.529	-2.17261	0.199563	-10.8868	1.33e-27	1.15e-25
ENSG00000134470	IL15RA	protein_coding	98.6877	-1.76069	0.162254	-10.8515	1.96e-27	1.69e-25
ENSG00000069702	TGFBR3	protein_coding	151.616	-2.74387	0.252966	-10.8468	2.07e-27	1.77e-25
ENSG00000127328	RAB3IP	protein_coding	212.622	1.65848	0.153002	10.8396	2.23e-27	1.91e-25
ENSG00000182518	FAM104B	protein_coding	167.699	1.84111	0.170037	10.8277	2.55e-27	2.17e-25
ENSG00000198692	EIF1AY	protein_coding	1647.49	10.3111	0.952443	10.826	2.59e-27	2.2e-25
ENSG00000187010	RHD	protein_coding	618.716	1.80083	0.166501	10.8157	2.9e-27	2.45e-25
ENSG00000198805	PNP	protein_coding	2190.6	1.94381	0.179795	10.8113	3.04e-27	2.57e-25
ENSG00000112343	TRIM38	protein_coding	1238.34	-0.765417	0.0708596	-10.8019	3.37e-27	2.83e-25
ENSG00000163536	SERPINI1	protein_coding	97.1827	2.95077	0.273371	10.794	3.67e-27	3.08e-25
ENSG00000128284	APOL3	protein_coding	1148.64	-1.33635	0.123945	-10.7818	4.2e-27	3.5e-25
ENSG00000157240	FZD1	protein_coding	75.662	-1.94202	0.18088	-10.7365	6.86e-27	5.7e-25
ENSG00000110324	IL10RA	protein_coding	2152.06	-1.04099	0.0969906	-10.7329	7.14e-27	5.92e-25
ENSG00000117090	SLAMF1	protein_coding	149.856	-1.17866	0.109833	-10.7314	7.25e-27	6e-25
ENSG00000177409	SAMD9L	protein_coding	1352.29	-1.71227	0.159737	-10.7193	8.26e-27	6.81e-25
ENSG00000163565	IFI16	protein_coding	3796.94	-1.13453	0.106154	-10.6876	1.16e-26	9.56e-25
ENSG00000125257	ABCC4	protein_coding	329.923	1.80204	0.168657	10.6846	1.2e-26	9.84e-25
ENSG00000176293	ZNF135	protein_coding	23.5494	2.41661	0.226252	10.6811	1.25e-26	1.02e-24
ENSG00000288960	ENSG00000288960	lncRNA	19.3181	2.3169	0.217293	10.6626	1.52e-26	1.24e-24
ENSG00000134986	NREP	protein_coding	32.9403	2.2473	0.210964	10.6526	1.7e-26	1.38e-24
ENSG00000127325	BEST3	protein_coding	16.2238	3.31879	0.311778	10.6447	1.85e-26	1.49e-24
ENSG00000156587	UBE2L6	protein_coding	1652.26	-1.39287	0.130971	-10.6349	2.05e-26	1.65e-24
ENSG00000111339	ART4	protein_coding	24.7782	4.5525	0.429243	10.6059	2.8e-26	2.25e-24
ENSG00000099204	ABLIM1	protein_coding	1734.6	1.2636	0.119346	10.5876	3.4e-26	2.72e-24
ENSG00000101076	HNF4A	protein_coding	17.0531	6.71014	0.634222	10.5801	3.69e-26	2.94e-24
ENSG00000082397	EPB41L3	protein_coding	271.234	-1.38274	0.131032	-10.5527	4.94e-26	3.93e-24
ENSG00000126775	ATG14	protein_coding	278.223	1.19213	0.113223	10.5291	6.35e-26	5.04e-24
ENSG00000141469	SLC14A1	protein_coding	2755.99	2.61377	0.248363	10.524	6.7e-26	5.3e-24
ENSG00000291003	ENSG00000291003	lncRNA	164.937	1.30054	0.123582	10.5237	6.72e-26	5.3e-24
ENSG00000080561	MID2	protein_coding	16.3961	-5.4108	0.514357	-10.5195	7.02e-26	5.52e-24
ENSG00000139083	ETV6	protein_coding	788.631	-0.930192	0.088428	-10.5192	7.05e-26	5.52e-24
ENSG00000214548	MEG3	lncRNA	68.0068	4.43883	0.422271	10.5118	7.62e-26	5.96e-24
ENSG00000065491	TBC1D22B	protein_coding	492.291	1.53157	0.145709	10.5112	7.67e-26	5.98e-24
ENSG00000169855	ROBO1	protein_coding	28.551	2.45965	0.234211	10.5019	8.47e-26	6.58e-24
ENSG00000225313	ENSG00000225313	lncRNA	162.248	-1.62572	0.155028	-10.4866	9.95e-26	7.71e-24
ENSG00000173598	NUDT4	protein_coding	1350.02	1.77709	0.169549	10.4813	1.05e-25	8.13e-24
ENSG00000010030	ETV7	protein_coding	65.4771	-3.60486	0.344225	-10.4724	1.16e-25	8.91e-24
ENSG00000136156	ITM2B	protein_coding	19217.7	-1.01968	0.097526	-10.4554	1.38e-25	1.06e-23
ENSG00000106327	TFR2	protein_coding	359.313	2.73169	0.261294	10.4545	1.4e-25	1.07e-23
ENSG00000110987	BCL7A	protein_coding	127.993	1.79519	0.17175	10.4523	1.43e-25	1.09e-23
ENSG00000140403	DNAJA4	protein_coding	920.387	1.75191	0.167671	10.4485	1.49e-25	1.13e-23
ENSG00000107242	PIP5K1B	protein_coding	252.597	1.83442	0.175713	10.4399	1.63e-25	1.24e-23
ENSG00000224397	PELATON	lncRNA	1749.55	-1.42712	0.136775	-10.4341	1.73e-25	1.31e-23
ENSG00000160219	GAB3	protein_coding	526.889	-0.966001	0.0926053	-10.4314	1.78e-25	1.34e-23
ENSG00000100453	GZMB	protein_coding	766.887	-2.6724	0.256522	-10.4179	2.06e-25	1.55e-23
ENSG00000162104	ADCY9	protein_coding	73.6674	-1.91069	0.183413	-10.4174	2.06e-25	1.55e-23
ENSG00000174130	TLR6	protein_coding	1340.18	-1.56566	0.150435	-10.4075	2.29e-25	1.71e-23
ENSG00000128050	PAICS	protein_coding	288.275	0.982199	0.0943936	10.4054	2.34e-25	1.75e-23
ENSG00000240065	PSMB9	protein_coding	2090.89	-1.41226	0.135969	-10.3866	2.85e-25	2.12e-23
ENSG00000182463	TSHZ2	protein_coding	14.6958	-5.82976	0.561339	-10.3854	2.89e-25	2.14e-23
ENSG00000145335	SNCA	protein_coding	21925.9	2.36165	0.227464	10.3825	2.98e-25	2.2e-23
ENSG00000120129	DUSP1	protein_coding	2280.04	-1.3472	0.129779	-10.3807	3.03e-25	2.24e-23
ENSG00000006555	TTC22	protein_coding	103.039	-1.71087	0.164953	-10.3718	3.33e-25	2.45e-23
ENSG00000166770	ZNF667-AS1	lncRNA	42.582	2.26471	0.218488	10.3654	3.56e-25	2.61e-23
ENSG00000121060	TRIM25	protein_coding	2748.04	-1.44269	0.139188	-10.3651	3.57e-25	2.61e-23
ENSG00000101782	RIOK3	protein_coding	6601.06	2.23341	0.215581	10.36	3.77e-25	2.75e-23
ENSG00000078304	PPP2R5C	protein_coding	1616.58	-0.672909	0.0650272	-10.3481	4.27e-25	3.1e-23
ENSG00000185745	IFIT1	protein_coding	1260.73	-2.71699	0.26259	-10.3469	4.32e-25	3.13e-23
ENSG00000173258	ZNF483	protein_coding	21.4896	-2.89533	0.280582	-10.319	5.78e-25	4.18e-23
ENSG00000146021	KLHL3	protein_coding	96.9788	1.27334	0.123419	10.3172	5.89e-25	4.24e-23
ENSG00000278318	ZNF229	protein_coding	17.4	2.81073	0.272595	10.311	6.28e-25	4.51e-23
ENSG00000197818	SLC9A8	protein_coding	892.449	-1.15855	0.112382	-10.309	6.42e-25	4.6e-23
ENSG00000092841	MYL6	protein_coding	10747.6	1.56924	0.15227	10.3057	6.64e-25	4.75e-23
ENSG00000263961	RHEX	protein_coding	19.3348	3.71761	0.360786	10.3042	6.75e-25	4.81e-23
ENSG00000135362	PRR5L	protein_coding	291.43	-1.952	0.18952	-10.2997	7.07e-25	5.02e-23
ENSG00000164251	F2RL1	protein_coding	286.039	-1.86945	0.181624	-10.293	7.58e-25	5.37e-23
ENSG00000112053	SLC26A8	protein_coding	116.01	-1.77512	0.172464	-10.2927	7.6e-25	5.37e-23
ENSG00000075340	ADD2	protein_coding	234.436	1.80721	0.175585	10.2925	7.62e-25	5.37e-23
ENSG00000108424	KPNB1	protein_coding	3251.51	-0.952992	0.0926057	-10.2909	7.75e-25	5.44e-23
ENSG00000126583	PRKCG	protein_coding	9.77874	4.19209	0.408442	10.2636	1.03e-24	7.2e-23
ENSG00000186462	NAP1L2	protein_coding	14.5898	-5.82659	0.568561	-10.248	1.21e-24	8.45e-23
ENSG00000013374	NUB1	protein_coding	1124.35	-0.839523	0.0820315	-10.2341	1.39e-24	9.72e-23
ENSG00000211695	TRGV9	TR_V_gene	68.5921	-2.93562	0.286979	-10.2294	1.46e-24	1.02e-22
ENSG00000062524	LTK	protein_coding	50.4895	-2.91829	0.285307	-10.2286	1.48e-24	1.02e-22
ENSG00000005381	MPO	protein_coding	1647.4	4.46644	0.436671	10.2284	1.48e-24	1.02e-22
ENSG00000180739	S1PR5	protein_coding	486.956	-2.81841	0.27562	-10.2257	1.52e-24	1.05e-22
ENSG00000118777	ABCG2	protein_coding	191.758	3.00642	0.294147	10.2208	1.6e-24	1.1e-22
ENSG00000054654	SYNE2	protein_coding	838.537	-1.08905	0.106553	-10.2207	1.6e-24	1.1e-22
ENSG00000147234	FRMPD3	protein_coding	20.3335	-4.97259	0.486621	-10.2186	1.64e-24	1.12e-22
ENSG00000226252	ENSG00000226252	lncRNA	11.7595	3.24288	0.317402	10.217	1.66e-24	1.14e-22
ENSG00000271736	LINC02772	lncRNA	424.451	3.02983	0.297059	10.1994	1.99e-24	1.36e-22
ENSG00000137441	FGFBP2	protein_coding	482.611	-2.77452	0.272171	-10.194	2.11e-24	1.43e-22
ENSG00000161929	SCIMP	protein_coding	521.285	-1.05956	0.103965	-10.1915	2.16e-24	1.46e-22
ENSG00000104738	MCM4	protein_coding	166.462	1.25981	0.123678	10.1862	2.28e-24	1.54e-22
ENSG00000148175	STOM	protein_coding	4219.75	1.59181	0.156369	10.1798	2.44e-24	1.64e-22
ENSG00000203867	RBM20	protein_coding	11.5971	3.59782	0.353461	10.1788	2.46e-24	1.66e-22
ENSG00000198876	DCAF12	protein_coding	22084.7	2.16736	0.213016	10.1746	2.57e-24	1.72e-22
ENSG00000211896	IGHG1	IG_C_gene	389.567	-4.36703	0.429818	-10.1602	2.99e-24	1.99e-22
ENSG00000243317	STMP1	protein_coding	1455.93	1.63358	0.160818	10.1579	3.05e-24	2.04e-22
ENSG00000167900	TK1	protein_coding	117.449	2.05933	0.202748	10.1571	3.08e-24	2.05e-22
ENSG00000267508	ZNF285	protein_coding	26.7336	1.98048	0.195013	10.1557	3.13e-24	2.07e-22
ENSG00000115657	ABCB6	protein_coding	16.7741	2.88638	0.284286	10.1531	3.21e-24	2.12e-22
ENSG00000146859	TMEM140	protein_coding	1309.49	-1.51156	0.148919	-10.1502	3.31e-24	2.18e-22
ENSG00000155966	AFF2	protein_coding	63.6705	2.35359	0.232187	10.1366	3.8e-24	2.5e-22
ENSG00000103569	AQP9	protein_coding	9154.04	-1.50355	0.14839	-10.1324	3.97e-24	2.6e-22
ENSG00000101057	MYBL2	protein_coding	111.36	2.05442	0.202789	10.1308	4.03e-24	2.64e-22
ENSG00000142945	KIF2C	protein_coding	41.5398	1.6016	0.158109	10.1297	4.08e-24	2.66e-22
ENSG00000135916	ITM2C	protein_coding	603.88	1.43213	0.141394	10.1286	4.12e-24	2.69e-22
ENSG00000198885	ITPRIPL1	protein_coding	64.3295	-2.03526	0.201079	-10.1217	4.43e-24	2.87e-22
ENSG00000133069	TMCC2	protein_coding	5398.94	3.35895	0.331861	10.1215	4.43e-24	2.87e-22
ENSG00000167414	GNG8	protein_coding	21.9645	2.82897	0.279604	10.1178	4.61e-24	2.98e-22
ENSG00000001084	GCLC	protein_coding	544.258	1.64799	0.163131	10.1023	5.4e-24	3.48e-22
ENSG00000182022	CHST15	protein_coding	2509.59	-1.48546	0.147078	-10.0998	5.53e-24	3.56e-22
ENSG00000282024	ENSG00000282024	lncRNA	62.3896	3.17161	0.314228	10.0933	5.91e-24	3.79e-22
ENSG00000133193	FAM104A	protein_coding	1544.27	1.73038	0.171479	10.0909	6.06e-24	3.88e-22
ENSG00000162923	WDR26	protein_coding	4288.12	1.37518	0.136616	10.066	7.81e-24	4.98e-22
ENSG00000075426	FOSL2	protein_coding	1689.97	-1.27305	0.126693	-10.0483	9.35e-24	5.95e-22
ENSG00000111843	TMEM14C	protein_coding	306.648	1.403	0.139715	10.0418	9.98e-24	6.34e-22
ENSG00000166341	DCHS1	protein_coding	112.199	2.03435	0.202713	10.0356	1.06e-23	6.74e-22
ENSG00000153395	LPCAT1	protein_coding	1775.32	-0.777564	0.0775155	-10.0311	1.11e-23	7.04e-22
ENSG00000149534	MS4A2	protein_coding	22.1213	3.19102	0.318287	10.0256	1.18e-23	7.42e-22
ENSG00000128487	SPECC1	protein_coding	537.898	1.2221	0.121933	10.0227	1.21e-23	7.62e-22
ENSG00000142168	SOD1	protein_coding	1136.27	1.38987	0.138681	10.022	1.22e-23	7.65e-22
ENSG00000099968	BCL2L13	protein_coding	963.405	1.08911	0.108736	10.0161	1.3e-23	8.11e-22
ENSG00000196415	PRTN3	protein_coding	477.794	5.28656	0.528033	10.0118	1.35e-23	8.45e-22
ENSG00000064012	CASP8	protein_coding	1518.06	-0.964572	0.0963567	-10.0104	1.37e-23	8.54e-22
ENSG00000160710	ADAR	protein_coding	7231.26	-1.02593	0.102526	-10.0066	1.43e-23	8.86e-22
ENSG00000126709	IFI6	protein_coding	1554.6	-2.19409	0.21932	-10.004	1.46e-23	9.07e-22
ENSG00000196684	HSH2D	protein_coding	1853.21	-1.06731	0.106748	-9.99841	1.55e-23	9.58e-22
ENSG00000161981	SNRNP25	protein_coding	123.991	1.19715	0.119821	9.99113	1.67e-23	1.03e-21
ENSG00000170485	NPAS2	protein_coding	28.2069	2.19004	0.219477	9.97844	1.89e-23	1.17e-21
ENSG00000157985	AGAP1	protein_coding	29.6523	-3.38425	0.339308	-9.97397	1.98e-23	1.22e-21
ENSG00000239713	APOBEC3G	protein_coding	609.333	-1.3376	0.134146	-9.97126	2.04e-23	1.25e-21
ENSG00000171843	MLLT3	protein_coding	186.512	0.930466	0.0934107	9.96102	2.26e-23	1.38e-21
ENSG00000183255	PTTG1IP	protein_coding	1997.22	-0.693388	0.0696246	-9.95895	2.3e-23	1.41e-21
ENSG00000146007	ZMAT2	protein_coding	3898.77	1.64386	0.165069	9.95864	2.31e-23	1.41e-21
ENSG00000173868	PHOSPHO1	protein_coding	18205.7	2.21905	0.222926	9.95421	2.42e-23	1.47e-21
ENSG00000183508	TENT5C	protein_coding	17705.9	2.74881	0.276162	9.95363	2.43e-23	1.47e-21
ENSG00000145247	OCIAD2	protein_coding	187.876	1.33149	0.133789	9.95222	2.47e-23	1.49e-21
ENSG00000112146	FBXO9	protein_coding	3587.92	1.80315	0.181225	9.94978	2.53e-23	1.52e-21
ENSG00000144290	SLC4A10	protein_coding	35.7098	-3.83768	0.385758	-9.94842	2.56e-23	1.54e-21
ENSG00000136542	GALNT5	protein_coding	54.1567	3.10694	0.31233	9.94763	2.58e-23	1.55e-21
ENSG00000133943	DGLUCY	protein_coding	964.108	-0.922949	0.0928199	-9.94345	2.69e-23	1.61e-21
ENSG00000181847	TIGIT	protein_coding	202.989	-2.00884	0.202355	-9.92729	3.17e-23	1.89e-21
ENSG00000135956	TMEM127	protein_coding	1869.09	-1.07933	0.108734	-9.92631	3.2e-23	1.91e-21
ENSG00000154978	VOPP1	protein_coding	934.273	-0.796641	0.0802695	-9.92458	3.25e-23	1.93e-21
ENSG00000072274	TFRC	protein_coding	697.072	1.94392	0.19587	9.92456	3.26e-23	1.93e-21
ENSG00000089127	OAS1	protein_coding	1092.86	-1.49755	0.150912	-9.92335	3.29e-23	1.95e-21
ENSG00000101846	STS	protein_coding	98.2549	-1.30074	0.131087	-9.92272	3.32e-23	1.96e-21
ENSG00000105737	GRIK5	protein_coding	18.4171	2.86738	0.289141	9.91687	3.52e-23	2.07e-21
ENSG00000166510	CCDC68	protein_coding	14.1632	4.57688	0.461721	9.91265	3.67e-23	2.15e-21
ENSG00000175643	RMI2	protein_coding	59.7173	1.46619	0.147958	9.90944	3.79e-23	2.22e-21
ENSG00000113721	PDGFRB	protein_coding	51.4247	-3.53864	0.357402	-9.90101	4.12e-23	2.41e-21
ENSG00000100307	CBX7	protein_coding	791.079	-0.83687	0.0845395	-9.89916	4.2e-23	2.45e-21
ENSG00000121858	TNFSF10	protein_coding	2614.39	-1.33258	0.134671	-9.89504	4.37e-23	2.55e-21
ENSG00000168824	NSG1	protein_coding	79.707	-1.89142	0.191242	-9.89018	4.59e-23	2.67e-21
ENSG00000059377	TBXAS1	protein_coding	1933.69	-1.005	0.10166	-9.88584	4.8e-23	2.78e-21
ENSG00000139187	KLRG1	protein_coding	183.902	-1.74404	0.176463	-9.8833	4.92e-23	2.84e-21
ENSG00000111181	SLC6A12	protein_coding	42.0593	-2.23576	0.22627	-9.88095	5.04e-23	2.91e-21
ENSG00000153029	MR1	protein_coding	705.933	-0.868818	0.0880515	-9.86715	5.78e-23	3.33e-21
ENSG00000168404	MLKL	protein_coding	839.995	-0.874396	0.0886187	-9.86695	5.79e-23	3.33e-21
ENSG00000155380	SLC16A1	protein_coding	190.23	1.76844	0.179508	9.85159	6.75e-23	3.87e-21
ENSG00000133488	SEC14L4	protein_coding	67.5802	2.21029	0.224611	9.84052	7.53e-23	4.31e-21
ENSG00000103257	SLC7A5	protein_coding	1445.47	2.55197	0.259533	9.83292	8.12e-23	4.63e-21
ENSG00000232677	LINC00665	lncRNA	72.328	1.71704	0.174665	9.83045	8.32e-23	4.74e-21
ENSG00000156711	MAPK13	protein_coding	768.714	-1.12778	0.11482	-9.8221	9.04e-23	5.14e-21
ENSG00000233387	IATPR	lncRNA	12.2477	-4.04053	0.41156	-9.8176	9.46e-23	5.36e-21
ENSG00000171793	CTPS1	protein_coding	148.65	0.920202	0.0939554	9.79404	1.19e-22	6.75e-21
ENSG00000264066	ENSG00000264066	lncRNA	9.6862	5.25295	0.5365	9.79114	1.23e-22	6.94e-21
ENSG00000165996	HACD1	protein_coding	21.7673	2.46226	0.2515	9.7903	1.24e-22	6.98e-21
ENSG00000196465	MYL6B	protein_coding	53.158	1.43155	0.146244	9.78873	1.26e-22	7.07e-21
ENSG00000073861	TBX21	protein_coding	518.732	-2.31984	0.237235	-9.77864	1.39e-22	7.79e-21
ENSG00000172216	CEBPB	protein_coding	3199.7	-1.29601	0.132537	-9.77848	1.39e-22	7.79e-21
ENSG00000115306	SPTBN1	protein_coding	913.314	0.955474	0.0977407	9.7756	1.43e-22	8e-21
ENSG00000287958	ENSG00000287958	lncRNA	26.4962	-2.58023	0.26409	-9.77026	1.51e-22	8.41e-21
ENSG00000059915	PSD	protein_coding	41.5716	1.6485	0.168766	9.76791	1.55e-22	8.59e-21
ENSG00000138760	SCARB2	protein_coding	458.769	-0.777942	0.0796977	-9.76116	1.65e-22	9.17e-21
ENSG00000185527	PDE6G	protein_coding	47.3621	2.15094	0.220423	9.75825	1.7e-22	9.41e-21
ENSG00000141574	SECTM1	protein_coding	3057.7	-1.85437	0.190042	-9.75768	1.71e-22	9.44e-21
ENSG00000167513	CDT1	protein_coding	58.7358	2.33265	0.239198	9.75198	1.81e-22	9.97e-21
ENSG00000133606	MKRN1	protein_coding	18372.5	1.83133	0.187876	9.74753	1.89e-22	1.04e-20
ENSG00000005189	REXO5	protein_coding	25.6741	2.10881	0.216343	9.74753	1.89e-22	1.04e-20
ENSG00000012232	EXTL3	protein_coding	774.23	-1.06743	0.109555	-9.7433	1.97e-22	1.08e-20
ENSG00000180644	PRF1	protein_coding	1976.67	-2.65595	0.272917	-9.73172	2.21e-22	1.21e-20
ENSG00000197142	ACSL5	protein_coding	412.742	-0.855475	0.0879145	-9.73076	2.23e-22	1.22e-20
ENSG00000115457	IGFBP2	protein_coding	34.6073	2.52928	0.259938	9.7303	2.24e-22	1.22e-20
ENSG00000004139	SARM1	protein_coding	56.8155	-1.41767	0.145779	-9.72478	2.36e-22	1.28e-20
ENSG00000112212	TSPO2	protein_coding	123.726	2.64434	0.271927	9.72445	2.37e-22	1.29e-20
ENSG00000211892	IGHG4	IG_C_gene	51.0529	-6.63459	0.682362	-9.72297	2.41e-22	1.3e-20
ENSG00000184545	DUSP8	protein_coding	24.6429	-2.13432	0.219517	-9.7228	2.41e-22	1.3e-20
ENSG00000166908	PIP4K2C	protein_coding	266.415	-0.834826	0.0858953	-9.7191	2.5e-22	1.35e-20
ENSG00000132530	XAF1	protein_coding	318.014	-1.84274	0.189631	-9.71752	2.54e-22	1.36e-20
ENSG00000131355	ADGRE3	protein_coding	1142.29	-1.27123	0.13082	-9.71744	2.54e-22	1.36e-20
ENSG00000059728	MXD1	protein_coding	7356.1	-1.32585	0.136609	-9.70544	2.86e-22	1.53e-20
ENSG00000182732	RGS6	protein_coding	296.11	2.39882	0.24745	9.69417	3.19e-22	1.7e-20
ENSG00000165626	BEND7	protein_coding	27.774	-3.19263	0.329417	-9.69176	3.27e-22	1.74e-20
ENSG00000043462	LCP2	protein_coding	2898.44	-0.711949	0.0734626	-9.69132	3.28e-22	1.75e-20
ENSG00000101307	SIRPB1	protein_coding	1980.08	-1.30698	0.134913	-9.68756	3.41e-22	1.8e-20
ENSG00000184271	POU6F1	protein_coding	65.3721	-1.67845	0.17333	-9.6836	3.54e-22	1.87e-20
ENSG00000236213	ENSG00000236213	lncRNA	11.5374	-3.37475	0.348503	-9.68356	3.54e-22	1.87e-20
ENSG00000185697	MYBL1	protein_coding	206.997	-2.43051	0.251143	-9.67779	3.75e-22	1.97e-20
ENSG00000186642	PDE2A	protein_coding	59.3804	2.51669	0.260128	9.67481	3.86e-22	2.03e-20
ENSG00000119138	KLF9	protein_coding	112.489	-1.4298	0.147998	-9.66092	4.42e-22	2.32e-20
ENSG00000217416	ISCA1P1	processed_pseudogene	26.9537	2.57907	0.26706	9.65729	4.58e-22	2.4e-20
ENSG00000113269	RNF130	protein_coding	2621.06	-0.788138	0.0816612	-9.65132	4.85e-22	2.53e-20
ENSG00000164611	PTTG1	protein_coding	104.248	1.5201	0.157559	9.64782	5.02e-22	2.62e-20
ENSG00000130560	UBAC1	protein_coding	716.709	1.3241	0.137276	9.64549	5.14e-22	2.67e-20
ENSG00000182378	PLCXD1	protein_coding	204.973	1.02717	0.106532	9.64186	5.32e-22	2.76e-20
ENSG00000177732	SOX12	protein_coding	130.034	1.33012	0.137971	9.64058	5.39e-22	2.79e-20
ENSG00000100554	ATP6V1D	protein_coding	1103.34	1.56649	0.162739	9.62579	6.22e-22	3.22e-20
ENSG00000105642	KCNN1	protein_coding	8.62947	5.41865	0.563564	9.61497	6.91e-22	3.57e-20
ENSG00000130589	HELZ2	protein_coding	1212.78	-1.54364	0.160931	-9.59195	8.64e-22	4.45e-20
ENSG00000206344	HCG27	lncRNA	794.26	-1.54464	0.161132	-9.58616	9.14e-22	4.7e-20
ENSG00000188582	PAQR9	protein_coding	55.0029	3.21205	0.335212	9.58216	9.5e-22	4.87e-20
ENSG00000173064	HECTD4	protein_coding	920.518	1.30028	0.135787	9.57587	1.01e-21	5.17e-20
ENSG00000173757	STAT5B	protein_coding	4360.45	-0.941418	0.0983174	-9.5753	1.02e-21	5.19e-20
ENSG00000138756	BMP2K	protein_coding	772.055	1.49838	0.156539	9.57192	1.05e-21	5.35e-20
ENSG00000289976	ENSG00000289976	lncRNA	11.9	3.03031	0.316699	9.5684	1.09e-21	5.52e-20
ENSG00000135451	TROAP	protein_coding	30.4471	2.41227	0.252776	9.54314	1.39e-21	7.04e-20
ENSG00000163818	LZTFL1	protein_coding	129.226	1.53348	0.160811	9.53591	1.49e-21	7.53e-20
ENSG00000164512	ANKRD55	protein_coding	80.4951	1.46165	0.153283	9.53561	1.49e-21	7.54e-20
ENSG00000106785	TRIM14	protein_coding	716.406	-0.775732	0.081371	-9.53327	1.52e-21	7.69e-20
ENSG00000120254	MTHFD1L	protein_coding	77.7903	1.63328	0.171604	9.51774	1.77e-21	8.92e-20
ENSG00000109572	CLCN3	protein_coding	626.376	1.29645	0.136275	9.51353	1.84e-21	9.27e-20
ENSG00000181873	IBA57	protein_coding	337.803	2.23484	0.235138	9.50436	2.01e-21	1.01e-19
ENSG00000121053	EPX	protein_coding	50.9303	5.0708	0.533677	9.50162	2.07e-21	1.03e-19
ENSG00000179639	FCER1A	protein_coding	139.352	2.01179	0.211917	9.4933	2.24e-21	1.12e-19
ENSG00000174059	CD34	protein_coding	47.6687	3.4671	0.365299	9.49113	2.29e-21	1.14e-19
ENSG00000104972	LILRB1	protein_coding	714.258	-1.46131	0.154	-9.48902	2.33e-21	1.16e-19
ENSG00000229474	PATL2	protein_coding	183.994	-1.38105	0.145599	-9.48532	2.42e-21	1.2e-19
ENSG00000167664	TMIGD2	protein_coding	215.949	1.54915	0.163331	9.48475	2.43e-21	1.21e-19
ENSG00000224000	ENSG00000224000	lncRNA	10.1284	4.04351	0.426543	9.47972	2.55e-21	1.26e-19
ENSG00000146425	DYNLT1	protein_coding	635.451	-0.907726	0.0957986	-9.47536	2.66e-21	1.31e-19
ENSG00000247092	SNHG10	lncRNA	53.9765	1.31242	0.138539	9.47329	2.71e-21	1.34e-19
ENSG00000291173	CASP4LP	lncRNA	18.9297	-3.14572	0.332095	-9.47235	2.74e-21	1.35e-19
ENSG00000067840	PDZD4	protein_coding	178.109	-2.72119	0.287305	-9.47145	2.76e-21	1.36e-19
ENSG00000166501	PRKCB	protein_coding	2961.1	-0.732008	0.0773581	-9.46259	3e-21	1.47e-19
ENSG00000234261	ENSG00000234261	lncRNA	16.2781	2.75369	0.291246	9.45487	3.23e-21	1.58e-19
ENSG00000101347	SAMHD1	protein_coding	4579.65	-0.611541	0.0647051	-9.4512	3.35e-21	1.64e-19
ENSG00000109927	TECTA	protein_coding	25.5647	2.41371	0.255438	9.44928	3.41e-21	1.66e-19
ENSG00000119669	IRF2BPL	protein_coding	450.109	-1.10113	0.116544	-9.44818	3.45e-21	1.68e-19
ENSG00000215811	BTNL10P	transcribed_unitary_pseudogene	46.872	2.90228	0.307389	9.44172	3.67e-21	1.78e-19
ENSG00000128512	DOCK4	protein_coding	141.879	-2.23225	0.236487	-9.43919	3.76e-21	1.82e-19
ENSG00000120594	PLXDC2	protein_coding	1085.94	-1.22317	0.129641	-9.43499	3.91e-21	1.89e-19
ENSG00000178694	NSUN3	protein_coding	515.806	1.53627	0.162931	9.42895	4.14e-21	2e-19
ENSG00000119655	NPC2	protein_coding	1161.28	-1.10471	0.117235	-9.42305	4.38e-21	2.11e-19
ENSG00000116717	GADD45A	protein_coding	472.499	1.86457	0.197921	9.42081	4.48e-21	2.15e-19
ENSG00000117226	GBP3	protein_coding	268.977	-1.72045	0.182639	-9.41997	4.51e-21	2.17e-19
ENSG00000072163	LIMS2	protein_coding	136.16	2.84648	0.302599	9.40678	5.12e-21	2.45e-19
ENSG00000100298	APOBEC3H	protein_coding	20.0662	-2.53811	0.269823	-9.40659	5.13e-21	2.45e-19
ENSG00000182885	ADGRG3	protein_coding	2472.39	-1.43109	0.152289	-9.39716	5.61e-21	2.68e-19
ENSG00000130066	SAT1	protein_coding	4142.78	-1.00856	0.1074	-9.39069	5.96e-21	2.84e-19
ENSG00000142949	PTPRF	protein_coding	120.751	2.44504	0.260466	9.38717	6.16e-21	2.93e-19
ENSG00000119714	GPR68	protein_coding	107.192	-1.72297	0.183603	-9.38422	6.34e-21	3.01e-19
ENSG00000137275	RIPK1	protein_coding	763.827	-0.640002	0.0683288	-9.3665	7.5e-21	3.55e-19
ENSG00000291135	FCGR1BP	lncRNA	122.77	-1.73823	0.185718	-9.35948	8.01e-21	3.79e-19
ENSG00000174485	DENND4A	protein_coding	683.604	1.04024	0.111158	9.35819	8.11e-21	3.83e-19
ENSG00000123485	HJURP	protein_coding	34.9018	1.94518	0.207925	9.35518	8.35e-21	3.93e-19
ENSG00000152785	BMP3	protein_coding	9.11427	5.00702	0.535309	9.35353	8.48e-21	3.99e-19
ENSG00000189238	LINC00943	lncRNA	6.69059	-5.68232	0.60801	-9.34577	9.12e-21	4.29e-19
ENSG00000081059	TCF7	protein_coding	2628.95	1.06602	0.114103	9.34265	9.4e-21	4.41e-19
ENSG00000143919	CAMKMT	protein_coding	58.3528	1.18425	0.126795	9.33994	9.64e-21	4.51e-19
ENSG00000182541	LIMK2	protein_coding	3123.67	-1.23727	0.132477	-9.33947	9.68e-21	4.52e-19
ENSG00000171051	FPR1	protein_coding	12725.7	-1.33602	0.143054	-9.33929	9.7e-21	4.52e-19
ENSG00000235169	SMIM1	protein_coding	413.125	3.1947	0.342091	9.33875	9.75e-21	4.54e-19
ENSG00000077157	PPP1R12B	protein_coding	617.081	-1.49078	0.159715	-9.33401	1.02e-20	4.74e-19
ENSG00000112394	SLC16A10	protein_coding	58.4387	2.02785	0.217274	9.33315	1.03e-20	4.77e-19
ENSG00000077984	CST7	protein_coding	2801.44	-1.55933	0.167133	-9.32988	1.06e-20	4.91e-19
ENSG00000120337	TNFSF18	protein_coding	11.2849	5.39198	0.578263	9.32445	1.12e-20	5.16e-19
ENSG00000165434	PGM2L1	protein_coding	171.944	1.53416	0.165034	9.29608	1.46e-20	6.72e-19
ENSG00000115523	GNLY	protein_coding	1993.55	-2.67761	0.288058	-9.29538	1.47e-20	6.76e-19
ENSG00000035720	STAP1	protein_coding	120.072	1.54754	0.166491	9.29501	1.47e-20	6.77e-19
ENSG00000118985	ELL2	protein_coding	341.379	1.54938	0.1668	9.28885	1.56e-20	7.16e-19
ENSG00000287263	ENSG00000287263	lncRNA	297.879	-1.17644	0.126703	-9.28501	1.62e-20	7.41e-19
ENSG00000189067	LITAF	protein_coding	11718.4	-1.47307	0.158801	-9.27617	1.76e-20	8.03e-19
ENSG00000160191	PDE9A	protein_coding	41.5708	2.39804	0.25873	9.26853	1.89e-20	8.61e-19
ENSG00000126262	FFAR2	protein_coding	3534.48	-1.35336	0.146056	-9.266	1.93e-20	8.81e-19
ENSG00000146555	SDK1	protein_coding	13.3011	3.46605	0.374301	9.26007	2.04e-20	9.29e-19
ENSG00000099194	SCD	protein_coding	199.814	1.68919	0.182426	9.25959	2.05e-20	9.32e-19
ENSG00000140455	USP3	protein_coding	747.491	-0.594177	0.0641933	-9.25607	2.12e-20	9.61e-19
ENSG00000106484	MEST	protein_coding	46.0969	1.72485	0.186372	9.25485	2.15e-20	9.71e-19
ENSG00000187764	SEMA4D	protein_coding	3063.08	-0.811464	0.0876924	-9.25353	2.17e-20	9.81e-19
ENSG00000086730	LAT2	protein_coding	2477.58	-0.94549	0.102211	-9.25041	2.24e-20	1.01e-18
ENSG00000115107	STEAP3	protein_coding	96.7383	1.40643	0.152216	9.23967	2.47e-20	1.11e-18
ENSG00000287312	ENSG00000287312	lncRNA	13.4096	3.41859	0.370078	9.23749	2.52e-20	1.13e-18
ENSG00000066294	CD84	protein_coding	423.04	-1.13461	0.122903	-9.23176	2.66e-20	1.19e-18
ENSG00000186187	ZNRF1	protein_coding	82.5918	1.35533	0.146829	9.23064	2.69e-20	1.2e-18
ENSG00000179010	MRFAP1	protein_coding	2355.15	0.806743	0.0874085	9.22956	2.72e-20	1.21e-18
ENSG00000289514	ENSG00000289514	lncRNA	111.302	2.13736	0.231724	9.22375	2.87e-20	1.28e-18
ENSG00000248323	LUCAT1	lncRNA	814.115	-1.64007	0.17783	-9.22267	2.9e-20	1.29e-18
ENSG00000196169	KIF19	protein_coding	24.5022	-4.3059	0.466902	-9.22228	2.91e-20	1.29e-18
ENSG00000112182	BACH2	protein_coding	338.399	1.25495	0.136194	9.21436	3.13e-20	1.39e-18
ENSG00000157045	NTAN1	protein_coding	459.661	1.52829	0.165911	9.21155	3.21e-20	1.42e-18
ENSG00000204592	HLA-E	protein_coding	42003.8	-0.919768	0.0998816	-9.20859	3.3e-20	1.46e-18
ENSG00000147416	ATP6V1B2	protein_coding	5590.76	-0.858492	0.0933246	-9.19899	3.61e-20	1.6e-18
ENSG00000147231	RADX	protein_coding	13.7345	-3.68352	0.40047	-9.19798	3.65e-20	1.61e-18
ENSG00000062716	VMP1	protein_coding	4325.19	-1.05348	0.114627	-9.19049	3.91e-20	1.72e-18
ENSG00000116771	AGMAT	protein_coding	77.7987	1.26782	0.13805	9.18378	4.16e-20	1.83e-18
ENSG00000161267	BDH1	protein_coding	149.081	1.02687	0.111838	9.18174	4.24e-20	1.86e-18
ENSG00000124098	FAM210B	protein_coding	17576.5	2.1519	0.234458	9.17819	4.38e-20	1.92e-18
ENSG00000111335	OAS2	protein_coding	1244.91	-1.17977	0.128589	-9.17478	4.53e-20	1.98e-18
ENSG00000198554	WDHD1	protein_coding	45.5694	1.30802	0.142617	9.17158	4.66e-20	2.03e-18
ENSG00000117399	CDC20	protein_coding	39.0134	2.0304	0.221459	9.16829	4.81e-20	2.09e-18
ENSG00000156970	BUB1B	protein_coding	23.4538	2.01875	0.220325	9.1626	5.07e-20	2.2e-18
ENSG00000166046	TCP11L2	protein_coding	1141.4	1.45374	0.158768	9.15634	5.37e-20	2.33e-18
ENSG00000115267	IFIH1	protein_coding	474.456	-1.20492	0.131649	-9.15252	5.56e-20	2.41e-18
ENSG00000175449	RFESD	protein_coding	30.6247	2.21581	0.242232	9.14748	5.83e-20	2.52e-18
ENSG00000082146	STRADB	protein_coding	12345.7	2.08294	0.227713	9.14718	5.84e-20	2.52e-18
ENSG00000103363	ELOB	protein_coding	2193.61	1.4815	0.161964	9.14713	5.85e-20	2.52e-18
ENSG00000178573	MAF	protein_coding	247.022	-1.69617	0.185445	-9.14645	5.88e-20	2.53e-18
ENSG00000181061	HIGD1A	protein_coding	323.784	1.79215	0.195947	9.14605	5.91e-20	2.54e-18
ENSG00000096060	FKBP5	protein_coding	1860.23	-1.36381	0.149176	-9.1423	6.11e-20	2.62e-18
ENSG00000132185	FCRLA	protein_coding	283.567	1.82949	0.200165	9.13991	6.25e-20	2.68e-18
ENSG00000133067	LGR6	protein_coding	70.4088	-2.90236	0.317565	-9.13941	6.28e-20	2.69e-18
ENSG00000099860	GADD45B	protein_coding	719.4	-1.21184	0.132608	-9.1385	6.33e-20	2.7e-18
ENSG00000122952	ZWINT	protein_coding	50.3549	1.61088	0.176297	9.13731	6.4e-20	2.73e-18
ENSG00000101290	CDS2	protein_coding	1165.21	-0.861298	0.0942727	-9.13624	6.47e-20	2.75e-18
ENSG00000136869	TLR4	protein_coding	2392.9	-1.39194	0.152358	-9.136	6.48e-20	2.75e-18
ENSG00000115155	OTOF	protein_coding	16.9078	-3.23355	0.354164	-9.13008	6.85e-20	2.9e-18
ENSG00000132698	RAB25	protein_coding	11.5693	2.79394	0.306066	9.12855	6.94e-20	2.94e-18
ENSG00000138623	SEMA7A	protein_coding	228.309	1.36148	0.149194	9.12558	7.14e-20	3.02e-18
ENSG00000197081	IGF2R	protein_coding	4895.39	-1.42631	0.156349	-9.12256	7.34e-20	3.1e-18
ENSG00000113088	GZMK	protein_coding	113.448	-1.51981	0.166772	-9.11312	8e-20	3.37e-18
ENSG00000111186	WNT5B	protein_coding	37.6774	1.9097	0.209679	9.1077	8.41e-20	3.54e-18
ENSG00000033327	GAB2	protein_coding	1650.54	-1.35342	0.148605	-9.10756	8.43e-20	3.54e-18
ENSG00000107779	BMPR1A	protein_coding	18.0489	-2.43658	0.267657	-9.10337	8.76e-20	3.67e-18
ENSG00000136147	PHF11	protein_coding	573.698	-0.900639	0.0989598	-9.10106	8.95e-20	3.75e-18
ENSG00000198734	F5	protein_coding	517.805	-1.76067	0.193517	-9.09825	9.18e-20	3.84e-18
ENSG00000196724	ZNF418	protein_coding	44.3256	1.58571	0.174329	9.09608	9.37e-20	3.91e-18
ENSG00000162772	ATF3	protein_coding	29.245	-1.93816	0.213183	-9.09151	9.77e-20	4.07e-18
ENSG00000256128	LINC00944	lncRNA	7.74807	-5.28797	0.581803	-9.08894	1e-19	4.16e-18
ENSG00000129244	ATP1B2	protein_coding	37.655	2.38829	0.262915	9.08387	1.05e-19	4.35e-18
ENSG00000198046	ZNF667	protein_coding	20.2208	2.69702	0.296997	9.08096	1.08e-19	4.46e-18
ENSG00000225079	FTH1P22	processed_pseudogene	12.333	-3.98621	0.439466	-9.07057	1.18e-19	4.9e-18
ENSG00000251301	LINC02384	lncRNA	69.4774	-2.32277	0.256262	-9.06405	1.26e-19	5.2e-18
ENSG00000055332	EIF2AK2	protein_coding	1251.66	-1.34378	0.148294	-9.06159	1.29e-19	5.31e-18
ENSG00000254470	AP5B1	protein_coding	2188.31	-1.24431	0.137329	-9.06076	1.3e-19	5.34e-18
ENSG00000100336	APOL4	protein_coding	68.592	-3.8019	0.419754	-9.05745	1.34e-19	5.49e-18
ENSG00000163219	ARHGAP25	protein_coding	2988.46	-0.853023	0.09424	-9.05159	1.41e-19	5.79e-18
ENSG00000261971	MMP25-AS1	lncRNA	1702.94	-1.36089	0.150367	-9.05046	1.42e-19	5.84e-18
ENSG00000149131	SERPING1	protein_coding	342.799	-2.08128	0.230243	-9.0395	1.57e-19	6.44e-18
ENSG00000198832	SELENOM	protein_coding	24.4578	-2.56175	0.283488	-9.03655	1.62e-19	6.61e-18
ENSG00000119333	DYNC2I2	protein_coding	80.8975	1.5828	0.175205	9.034	1.66e-19	6.75e-18
ENSG00000147457	CHMP7	protein_coding	1144.16	0.713166	0.078946	9.03359	1.66e-19	6.77e-18
ENSG00000165617	DACT1	protein_coding	59.5284	2.21266	0.245015	9.0307	1.71e-19	6.93e-18
ENSG00000008952	SEC62	protein_coding	2978.57	1.59149	0.176244	9.03006	1.72e-19	6.96e-18
ENSG00000285486	ENSG00000285486	lncRNA	16.4731	3.60048	0.398847	9.02723	1.76e-19	7.13e-18
ENSG00000076770	MBNL3	protein_coding	5250.77	2.01448	0.2232	9.02546	1.79e-19	7.23e-18
ENSG00000143376	SNX27	protein_coding	837.211	-0.852882	0.094593	-9.01633	1.95e-19	7.85e-18
ENSG00000177989	ODF3B	protein_coding	567.474	-1.45297	0.161246	-9.01091	2.04e-19	8.23e-18
ENSG00000137101	CD72	protein_coding	199.512	1.46603	0.16277	9.00674	2.12e-19	8.54e-18
ENSG00000198814	GK	protein_coding	1063.58	-1.57165	0.174601	-9.00136	2.23e-19	8.96e-18
ENSG00000130638	ATXN10	protein_coding	467.203	0.736747	0.081931	8.99228	2.42e-19	9.71e-18
ENSG00000275395	FCGBP	protein_coding	309.776	1.96295	0.218442	8.98615	2.56e-19	1.03e-17
ENSG00000205336	ADGRG1	protein_coding	622.021	-2.61312	0.290997	-8.97986	2.71e-19	1.08e-17
ENSG00000132359	RAP1GAP2	protein_coding	1127.87	-1.0283	0.114557	-8.97631	2.8e-19	1.12e-17
ENSG00000235105	ENSG00000235105	processed_pseudogene	896.703	1.98856	0.221588	8.97411	2.86e-19	1.14e-17
ENSG00000005187	ACSM3	protein_coding	84.9198	1.11019	0.123718	8.97353	2.87e-19	1.14e-17
ENSG00000198353	HOXC4	protein_coding	12.4224	-3.94121	0.439247	-8.97266	2.89e-19	1.15e-17
ENSG00000164342	TLR3	protein_coding	13.0898	-3.21924	0.358932	-8.96894	2.99e-19	1.19e-17
ENSG00000163131	CTSS	protein_coding	18799.6	-1.00492	0.112127	-8.96227	3.18e-19	1.26e-17
ENSG00000115604	IL18R1	protein_coding	225.806	-1.67799	0.187302	-8.95871	3.28e-19	1.3e-17
ENSG00000213928	IRF9	protein_coding	286.132	-1.15587	0.129066	-8.95566	3.38e-19	1.33e-17
ENSG00000167986	DDB1	protein_coding	2285.76	1.19324	0.133261	8.9542	3.42e-19	1.35e-17
ENSG00000124731	TREM1	protein_coding	3271.47	-1.26261	0.141036	-8.95244	3.48e-19	1.37e-17
ENSG00000136167	LCP1	protein_coding	24272	-0.934273	0.104367	-8.95178	3.5e-19	1.38e-17
ENSG00000135776	ABCB10	protein_coding	360.864	1.79901	0.201027	8.94909	3.58e-19	1.41e-17
ENSG00000062282	DGAT2	protein_coding	1827.98	-1.351	0.151014	-8.94621	3.68e-19	1.44e-17
ENSG00000128322	IGLL1	protein_coding	12.2166	4.3416	0.485451	8.94343	3.77e-19	1.48e-17
ENSG00000135828	RNASEL	protein_coding	502.804	-1.09056	0.121943	-8.94316	3.78e-19	1.48e-17
ENSG00000119682	AREL1	protein_coding	829.109	-0.797479	0.0891812	-8.94223	3.81e-19	1.49e-17
ENSG00000167641	PPP1R14A	protein_coding	36.1982	2.06413	0.230899	8.93952	3.91e-19	1.52e-17
ENSG00000260455	NBAT1	lncRNA	3.6634	5.47055	0.612058	8.93797	3.96e-19	1.54e-17
ENSG00000070018	LRP6	protein_coding	29.7425	1.62255	0.181596	8.9349	4.08e-19	1.58e-17
ENSG00000167460	TPM4	protein_coding	2215.97	-0.672845	0.0753064	-8.93477	4.08e-19	1.58e-17
ENSG00000102524	TNFSF13B	protein_coding	1170	-1.54143	0.172525	-8.93452	4.09e-19	1.58e-17
ENSG00000137266	SLC22A23	protein_coding	160.901	1.50844	0.169046	8.92326	4.53e-19	1.75e-17
ENSG00000198258	UBL5	protein_coding	864.638	1.31111	0.146937	8.9229	4.54e-19	1.75e-17
ENSG00000116106	EPHA4	protein_coding	71.5152	1.2171	0.136456	8.91934	4.69e-19	1.81e-17
ENSG00000100154	TTC28	protein_coding	27.9972	1.73329	0.194497	8.91168	5.03e-19	1.93e-17
ENSG00000181215	C4orf50	protein_coding	6.51063	-5.64192	0.6335	-8.90595	5.29e-19	2.03e-17
ENSG00000151136	ABTB3	protein_coding	161.048	0.865327	0.0971693	8.90536	5.32e-19	2.04e-17
ENSG00000170525	PFKFB3	protein_coding	1266.49	-1.24917	0.140316	-8.90253	5.46e-19	2.09e-17
ENSG00000100968	NFATC4	protein_coding	8.21205	4.43635	0.498357	8.90196	5.49e-19	2.1e-17
ENSG00000258102	MAP1LC3B2	protein_coding	225.161	1.13416	0.127407	8.90187	5.49e-19	2.1e-17
ENSG00000211898	IGHD	IG_C_gene	649.697	1.84735	0.20758	8.89947	5.61e-19	2.14e-17
ENSG00000254087	LYN	protein_coding	5936.99	-1.07283	0.120558	-8.89892	5.64e-19	2.15e-17
ENSG00000144218	AFF3	protein_coding	155.857	1.60532	0.180637	8.88699	6.28e-19	2.39e-17
ENSG00000154102	C16orf74	protein_coding	43.1562	1.67692	0.188725	8.88551	6.36e-19	2.42e-17
ENSG00000166947	EPB42	protein_coding	5408.75	2.33427	0.262804	8.88216	6.56e-19	2.49e-17
ENSG00000181856	SLC2A4	protein_coding	36.1909	2.7601	0.310838	8.87955	6.71e-19	2.54e-17
ENSG00000173660	UQCRH	protein_coding	631.984	1.11675	0.125818	8.8759	6.94e-19	2.62e-17
ENSG00000214253	FIS1	protein_coding	2505.27	1.74559	0.196689	8.87485	7e-19	2.64e-17
ENSG00000163634	THOC7	protein_coding	425.114	1.22501	0.138034	8.87468	7.01e-19	2.64e-17
ENSG00000165895	ARHGAP42	protein_coding	26.9499	2.50059	0.281929	8.8696	7.34e-19	2.76e-17
ENSG00000089157	RPLP0	protein_coding	9717.93	1.07713	0.12162	8.85656	8.25e-19	3.1e-17
ENSG00000175931	UBE2O	protein_coding	2210.47	1.99979	0.226074	8.84574	9.09e-19	3.41e-17
ENSG00000179909	ZNF154	protein_coding	98.7182	1.65528	0.187314	8.83696	9.84e-19	3.69e-17
ENSG00000186063	AIDA	protein_coding	603.294	1.39644	0.158025	8.83679	9.85e-19	3.69e-17
ENSG00000136997	MYC	protein_coding	628.451	0.891902	0.100935	8.83642	9.88e-19	3.69e-17
ENSG00000137628	DDX60	protein_coding	497.025	-1.45929	0.165189	-8.83408	1.01e-18	3.77e-17
ENSG00000264920	SP2-DT	lncRNA	31.1689	1.95107	0.220944	8.83062	1.04e-18	3.88e-17
ENSG00000204934	ATP6V0E2-AS1	lncRNA	31.7421	1.69452	0.191953	8.82777	1.07e-18	3.97e-17
ENSG00000185920	PTCH1	protein_coding	92.3392	-1.88731	0.214018	-8.81844	1.16e-18	4.31e-17
ENSG00000235621	LINC00494	lncRNA	34.9244	1.68971	0.191617	8.81815	1.16e-18	4.32e-17
ENSG00000112655	PTK7	protein_coding	56.4308	2.14173	0.242999	8.81376	1.21e-18	4.48e-17
ENSG00000094804	CDC6	protein_coding	29.5995	1.48793	0.168999	8.80438	1.32e-18	4.87e-17
ENSG00000011028	MRC2	protein_coding	1008.51	2.04258	0.232018	8.80353	1.33e-18	4.9e-17
ENSG00000287642	ENSG00000287642	lncRNA	71.0188	2.72119	0.309119	8.80305	1.33e-18	4.91e-17
ENSG00000156804	FBXO32	protein_coding	108.842	-1.11726	0.126975	-8.79903	1.38e-18	5.08e-17
ENSG00000142686	C1orf216	protein_coding	82.2704	-1.16105	0.131983	-8.79693	1.41e-18	5.17e-17
ENSG00000172765	TMCC1	protein_coding	456.148	-0.900108	0.102342	-8.79513	1.43e-18	5.25e-17
ENSG00000183597	TANGO2	protein_coding	1621.84	1.41884	0.161415	8.79	1.5e-18	5.49e-17
ENSG00000160712	IL6R	protein_coding	4937.02	-0.995178	0.113366	-8.77845	1.66e-18	6.07e-17
ENSG00000126353	CCR7	protein_coding	2060.05	1.35454	0.154344	8.77613	1.69e-18	6.19e-17
ENSG00000115590	IL1R2	protein_coding	710.681	-1.44295	0.164439	-8.775	1.71e-18	6.24e-17
ENSG00000139278	GLIPR1	protein_coding	1361.32	-0.931287	0.106147	-8.77357	1.73e-18	6.31e-17
ENSG00000105339	DENND3	protein_coding	3610.82	-1.02542	0.116959	-8.76735	1.83e-18	6.66e-17
ENSG00000169087	HSPBAP1	protein_coding	349.412	-0.828867	0.0945494	-8.7665	1.84e-18	6.7e-17
ENSG00000176641	RNF152	protein_coding	24.0734	3.38945	0.386755	8.76382	1.89e-18	6.86e-17
ENSG00000161405	IKZF3	protein_coding	1171.73	-1.02524	0.117004	-8.76245	1.91e-18	6.93e-17
ENSG00000143365	RORC	protein_coding	36.2989	-2.13674	0.243896	-8.76086	1.94e-18	7.02e-17
ENSG00000079691	CARMIL1	protein_coding	45.3099	1.4274	0.162958	8.75927	1.97e-18	7.11e-17
ENSG00000231167	YBX1P2	processed_pseudogene	93.3904	1.46049	0.166842	8.75375	2.06e-18	7.45e-17
ENSG00000267369	TAF5LP1	processed_pseudogene	161.139	-1.38018	0.157727	-8.75043	2.13e-18	7.67e-17
ENSG00000181381	DDX60L	protein_coding	1748.98	-1.72001	0.196573	-8.74998	2.13e-18	7.69e-17
ENSG00000165349	SLC7A3	protein_coding	7.33368	4.06218	0.464615	8.7431	2.27e-18	8.16e-17
ENSG00000155962	CLIC2	protein_coding	171.661	2.06842	0.236905	8.73102	2.52e-18	9.07e-17
ENSG00000104131	EIF3J	protein_coding	593.251	1.2141	0.139156	8.72475	2.67e-18	9.57e-17
ENSG00000100346	CACNA1I	protein_coding	57.3704	-2.07465	0.238095	-8.71353	2.95e-18	1.06e-16
ENSG00000253982	CLN8-AS1	lncRNA	1270.1	1.927	0.221201	8.7115	3e-18	1.07e-16
ENSG00000173372	C1QA	protein_coding	31.0742	-3.76706	0.432929	-8.70135	3.28e-18	1.17e-16
ENSG00000110079	MS4A4A	protein_coding	57.2333	-1.59641	0.183472	-8.7011	3.29e-18	1.17e-16
ENSG00000164877	MICALL2	protein_coding	98.4685	1.88392	0.21655	8.69972	3.33e-18	1.19e-16
ENSG00000289271	ENSG00000289271	lncRNA	29.8652	2.18998	0.251818	8.69668	3.42e-18	1.22e-16
ENSG00000174718	RESF1	protein_coding	3012.95	-1.4743	0.169557	-8.69503	3.47e-18	1.23e-16
ENSG00000166224	SGPL1	protein_coding	353.744	-0.62571	0.0719844	-8.6923	3.55e-18	1.26e-16
ENSG00000165507	DEPP1	protein_coding	30.8882	2.80397	0.322837	8.6854	3.77e-18	1.34e-16
ENSG00000068079	IFI35	protein_coding	637.614	-1.29846	0.149581	-8.68061	3.94e-18	1.39e-16
ENSG00000124357	NAGK	protein_coding	2393.72	-1.00051	0.115277	-8.67914	3.99e-18	1.41e-16
ENSG00000135074	ADAM19	protein_coding	1202.62	-1.0775	0.124159	-8.67844	4.01e-18	1.42e-16
ENSG00000182796	TMEM198B	transcribed_unitary_pseudogene	136.534	1.01167	0.116576	8.67821	4.02e-18	1.42e-16
ENSG00000136068	FLNB	protein_coding	391.288	1.08447	0.124982	8.67701	4.06e-18	1.43e-16
ENSG00000024526	DEPDC1	protein_coding	16.0933	2.62449	0.302661	8.67136	4.27e-18	1.5e-16
ENSG00000166278	C2	protein_coding	21.276	-2.57663	0.297389	-8.66417	4.55e-18	1.6e-16
ENSG00000152778	IFIT5	protein_coding	447.229	-1.83378	0.211751	-8.66005	4.72e-18	1.65e-16
ENSG00000148143	ZNF462	protein_coding	10.8523	2.35881	0.272449	8.65778	4.81e-18	1.68e-16
ENSG00000168329	CX3CR1	protein_coding	1882.05	-1.26217	0.145816	-8.65591	4.89e-18	1.71e-16
ENSG00000188690	UROS	protein_coding	339.288	0.899256	0.103938	8.65183	5.07e-18	1.77e-16
ENSG00000140563	MCTP2	protein_coding	1099.75	-1.24211	0.143655	-8.64646	5.31e-18	1.85e-16
ENSG00000136816	TOR1B	protein_coding	533.252	-0.879555	0.101734	-8.6456	5.35e-18	1.86e-16
ENSG00000100911	PSME2	protein_coding	1252.64	-1.09168	0.126378	-8.63822	5.71e-18	1.98e-16
ENSG00000261150	EPPK1	protein_coding	34.7779	2.03868	0.236074	8.63576	5.83e-18	2.02e-16
ENSG00000124126	PREX1	protein_coding	5187.14	-1.157	0.134015	-8.63332	5.96e-18	2.07e-16
ENSG00000100731	PCNX1	protein_coding	1400.11	-1.06003	0.122795	-8.63249	6e-18	2.08e-16
ENSG00000057757	PITHD1	protein_coding	1812.96	1.82042	0.210918	8.63092	6.09e-18	2.1e-16
ENSG00000254999	BRK1	protein_coding	1619.2	0.935734	0.10845	8.62822	6.23e-18	2.15e-16
ENSG00000164929	BAALC	protein_coding	13.0499	3.20871	0.37192	8.62742	6.28e-18	2.16e-16
ENSG00000288771	ENSG00000288771	lncRNA	100.787	1.59376	0.184733	8.62739	6.28e-18	2.16e-16
ENSG00000205639	MFSD2B	protein_coding	546.532	2.02129	0.234302	8.62686	6.31e-18	2.17e-16
ENSG00000134285	FKBP11	protein_coding	211.372	-1.10027	0.127556	-8.6258	6.36e-18	2.19e-16
ENSG00000166002	SMCO4	protein_coding	217.836	-0.970687	0.112576	-8.62248	6.55e-18	2.25e-16
ENSG00000164674	SYTL3	protein_coding	381.947	-1.04673	0.12152	-8.61371	7.07e-18	2.42e-16
ENSG00000159915	ZNF233	protein_coding	11.4205	2.18443	0.253722	8.60954	7.34e-18	2.51e-16
ENSG00000140332	TLE3	protein_coding	2705.63	-1.1932	0.138648	-8.60598	7.57e-18	2.58e-16
ENSG00000231711	LINC00899	lncRNA	17.2879	-2.65813	0.308905	-8.605	7.63e-18	2.6e-16
ENSG00000286546	ENSG00000286546	lncRNA	9.2468	3.01886	0.350913	8.60288	7.77e-18	2.65e-16
ENSG00000125779	PANK2	protein_coding	530.645	-0.640497	0.0744525	-8.60277	7.78e-18	2.65e-16
ENSG00000174125	TLR1	protein_coding	1368.89	-1.37331	0.15966	-8.60143	7.87e-18	2.68e-16
ENSG00000135604	STX11	protein_coding	1277.42	-1.10884	0.128926	-8.60064	7.93e-18	2.69e-16
ENSG00000088827	SIGLEC1	protein_coding	205.787	-2.3715	0.275936	-8.59439	8.37e-18	2.84e-16
ENSG00000132109	TRIM21	protein_coding	979.193	-1.02403	0.119202	-8.59075	8.64e-18	2.92e-16
ENSG00000089159	PXN	protein_coding	2537.12	-1.00181	0.116661	-8.58739	8.9e-18	3.01e-16
ENSG00000140057	AK7	protein_coding	11.8329	3.39235	0.395559	8.57609	9.82e-18	3.31e-16
ENSG00000109685	NSD2	protein_coding	319.458	0.625869	0.072981	8.57578	9.84e-18	3.32e-16
ENSG00000152082	MZT2B	protein_coding	241.971	1.4089	0.164434	8.56823	1.05e-17	3.54e-16
ENSG00000288961	ENSG00000288961	lncRNA	36.4181	1.84232	0.21504	8.56731	1.06e-17	3.56e-16
ENSG00000134046	MBD2	protein_coding	1094.82	-0.673145	0.0786129	-8.56277	1.1e-17	3.7e-16
ENSG00000111859	NEDD9	protein_coding	821.395	-0.94117	0.110023	-8.55427	1.19e-17	3.98e-16
ENSG00000089685	BIRC5	protein_coding	45.487	1.55087	0.181412	8.54885	1.24e-17	4.16e-16
ENSG00000197948	FCHSD1	protein_coding	374.564	-1.14303	0.133848	-8.53978	1.34e-17	4.5e-16
ENSG00000113719	ERGIC1	protein_coding	2660.27	-0.918591	0.107592	-8.53775	1.37e-17	4.57e-16
ENSG00000101150	TPD52L2	protein_coding	1672.3	-0.709307	0.083089	-8.53672	1.38e-17	4.61e-16
ENSG00000164136	IL15	protein_coding	69.6519	-1.54585	0.181136	-8.53421	1.41e-17	4.7e-16
ENSG00000238269	PAGE2B	protein_coding	141.642	2.35785	0.2764	8.53058	1.46e-17	4.85e-16
ENSG00000054356	PTPRN	protein_coding	113.556	3.8021	0.446214	8.5208	1.58e-17	5.27e-16
ENSG00000134830	C5AR2	protein_coding	1168.8	-1.03556	0.121628	-8.51413	1.68e-17	5.57e-16
ENSG00000163617	CCDC191	protein_coding	84.5854	1.18539	0.139263	8.51192	1.71e-17	5.67e-16
ENSG00000111199	TRPV4	protein_coding	10.3191	-3.99646	0.469521	-8.51178	1.71e-17	5.67e-16
ENSG00000163827	LRRC2	protein_coding	34.7058	2.83083	0.332729	8.50792	1.77e-17	5.85e-16
ENSG00000171914	TLN2	protein_coding	40.6849	2.20369	0.259114	8.50471	1.82e-17	6.01e-16
ENSG00000133321	PLAAT4	protein_coding	610.658	-1.26988	0.14934	-8.50327	1.84e-17	6.08e-16
ENSG00000186567	CEACAM19	protein_coding	34.0096	2.05239	0.241528	8.49753	1.94e-17	6.38e-16
ENSG00000007062	PROM1	protein_coding	11.4605	3.29788	0.388113	8.49722	1.94e-17	6.39e-16
ENSG00000178860	MSC	protein_coding	19.4959	-3.65042	0.42974	-8.49448	1.99e-17	6.53e-16
ENSG00000132541	RIDA	protein_coding	68.3281	2.04722	0.241164	8.48891	2.09e-17	6.84e-16
ENSG00000123975	CKS2	protein_coding	62.3109	1.85075	0.218157	8.48357	2.18e-17	7.16e-16
ENSG00000188175	HEPACAM2	protein_coding	96.8434	2.64773	0.31215	8.48225	2.21e-17	7.23e-16
ENSG00000128594	LRRC4	protein_coding	549.227	-1.18567	0.139789	-8.48184	2.22e-17	7.25e-16
ENSG00000067066	SP100	protein_coding	2199.45	-0.738496	0.0871486	-8.47399	2.37e-17	7.74e-16
ENSG00000092621	PHGDH	protein_coding	61.9268	1.56589	0.184861	8.47067	2.44e-17	7.95e-16
ENSG00000197859	ADAMTSL2	protein_coding	7.87605	4.006	0.472953	8.47018	2.45e-17	7.98e-16
ENSG00000213420	GPC2	protein_coding	43.2346	1.49109	0.176086	8.46793	2.5e-17	8.12e-16
ENSG00000138642	HERC6	protein_coding	231.472	-1.29443	0.153005	-8.46003	2.67e-17	8.68e-16
ENSG00000107833	NPM3	protein_coding	77.4825	1.1584	0.136962	8.45783	2.72e-17	8.84e-16
ENSG00000116793	PHTF1	protein_coding	167.21	-1.16863	0.13818	-8.45729	2.74e-17	8.87e-16
ENSG00000059804	SLC2A3	protein_coding	4432.77	-1.26179	0.149217	-8.45606	2.77e-17	8.95e-16
ENSG00000167315	ACAA2	protein_coding	256.482	-0.882011	0.104311	-8.45559	2.78e-17	8.97e-16
ENSG00000163444	TMEM183A	protein_coding	1166.17	0.884139	0.104634	8.44979	2.92e-17	9.41e-16
ENSG00000124201	ZNFX1	protein_coding	1689.97	-1.03799	0.122843	-8.44973	2.92e-17	9.41e-16
ENSG00000134376	CRB1	protein_coding	12.8619	3.31511	0.392382	8.44867	2.95e-17	9.49e-16
ENSG00000067141	NEO1	protein_coding	28.6369	-1.97843	0.234178	-8.44838	2.95e-17	9.5e-16
ENSG00000140743	CDR2	protein_coding	343.656	0.844194	0.0999622	8.44513	3.04e-17	9.75e-16
ENSG00000100448	CTSG	protein_coding	440.969	4.17968	0.49496	8.44447	3.05e-17	9.8e-16
ENSG00000157456	CCNB2	protein_coding	40.0183	1.80022	0.213225	8.44282	3.1e-17	9.92e-16
ENSG00000002587	HS3ST1	protein_coding	18.5399	2.0342	0.240941	8.44273	3.1e-17	9.92e-16
ENSG00000169398	PTK2	protein_coding	124.232	0.994125	0.117759	8.44206	3.12e-17	9.96e-16
ENSG00000096063	SRPK1	protein_coding	584.633	-1.09825	0.130278	-8.43002	3.46e-17	1.1e-15
ENSG00000172264	MACROD2	protein_coding	35.4969	2.45444	0.291178	8.42933	3.48e-17	1.11e-15
ENSG00000122783	CYREN	protein_coding	404.135	-1.13514	0.134811	-8.42023	3.76e-17	1.2e-15
ENSG00000157601	MX1	protein_coding	1925.28	-2.07383	0.246451	-8.41477	3.94e-17	1.25e-15
ENSG00000172936	MYD88	protein_coding	3025.51	-1.00983	0.120009	-8.41462	3.94e-17	1.25e-15
ENSG00000057252	SOAT1	protein_coding	627.747	-0.950485	0.113048	-8.4078	4.18e-17	1.33e-15
ENSG00000088325	TPX2	protein_coding	85.7439	1.7301	0.205778	8.40758	4.19e-17	1.33e-15
ENSG00000181982	CCDC149	protein_coding	103.132	-1.03877	0.123607	-8.4038	4.32e-17	1.37e-15
ENSG00000085514	PILRA	protein_coding	1517.19	-1.06484	0.126775	-8.39942	4.49e-17	1.42e-15
ENSG00000147459	DOCK5	protein_coding	1884.98	-1.29179	0.153805	-8.39888	4.51e-17	1.42e-15
ENSG00000118900	UBN1	protein_coding	1780.93	-0.976219	0.116244	-8.39801	4.54e-17	1.43e-15
ENSG00000121807	CCR2	protein_coding	1074.53	-1.06708	0.127077	-8.39708	4.58e-17	1.44e-15
ENSG00000100225	FBXO7	protein_coding	28019	1.66226	0.197996	8.39541	4.64e-17	1.46e-15
ENSG00000170345	FOS	protein_coding	728.715	-1.21379	0.144583	-8.39511	4.65e-17	1.46e-15
ENSG00000167995	BEST1	protein_coding	537.4	-1.10067	0.131129	-8.39376	4.71e-17	1.48e-15
ENSG00000134909	ARHGAP32	protein_coding	65.3103	1.14316	0.136206	8.39291	4.74e-17	1.49e-15
ENSG00000067992	PDK3	protein_coding	797.551	-0.86836	0.103506	-8.38951	4.88e-17	1.53e-15
ENSG00000143158	MPC2	protein_coding	281.34	1.40267	0.167308	8.38373	5.13e-17	1.6e-15
ENSG00000182923	CEP63	protein_coding	386.883	-1.25146	0.149289	-8.38276	5.17e-17	1.61e-15
ENSG00000131153	GINS2	protein_coding	36.9166	1.82496	0.217728	8.38182	5.21e-17	1.63e-15
ENSG00000137942	FNBP1L	protein_coding	58.1167	1.84193	0.21978	8.3808	5.26e-17	1.64e-15
ENSG00000130703	OSBPL2	protein_coding	1122.91	-0.75488	0.0900815	-8.37997	5.29e-17	1.65e-15
ENSG00000138119	MYOF	protein_coding	262.801	-1.65132	0.197158	-8.37562	5.49e-17	1.71e-15
ENSG00000125827	TMX4	protein_coding	1379.12	-1.04665	0.124987	-8.37409	5.57e-17	1.73e-15
ENSG00000136161	RCBTB2	protein_coding	609.368	-1.18075	0.141057	-8.37074	5.73e-17	1.77e-15
ENSG00000149212	SESN3	protein_coding	2749.36	1.54159	0.184264	8.36616	5.95e-17	1.84e-15
ENSG00000173535	TNFRSF10C	protein_coding	3381.04	-1.32661	0.15861	-8.36396	6.06e-17	1.88e-15
ENSG00000037280	FLT4	protein_coding	16.8115	-3.01079	0.36008	-8.36142	6.2e-17	1.91e-15
ENSG00000163947	ARHGEF3	protein_coding	794.342	-0.879506	0.105231	-8.35789	6.39e-17	1.97e-15
ENSG00000175104	TRAF6	protein_coding	260.871	-0.58925	0.0705154	-8.35633	6.47e-17	1.99e-15
ENSG00000134057	CCNB1	protein_coding	53.409	1.49093	0.178424	8.35611	6.48e-17	1.99e-15
ENSG00000100380	ST13	protein_coding	2637.57	1.01614	0.12162	8.35502	6.54e-17	2.01e-15
ENSG00000173083	HPSE	protein_coding	475.134	-1.11152	0.133061	-8.35341	6.63e-17	2.04e-15
ENSG00000117394	SLC2A1	protein_coding	1868.97	1.91896	0.229848	8.34884	6.89e-17	2.11e-15
ENSG00000260220	CCDC187	protein_coding	8.94094	3.59184	0.430225	8.34874	6.9e-17	2.11e-15
ENSG00000165775	FUNDC2	protein_coding	1037.49	1.34127	0.160656	8.3487	6.9e-17	2.11e-15
ENSG00000170312	CDK1	protein_coding	42.0863	1.95802	0.234532	8.34864	6.91e-17	2.11e-15
ENSG00000291052	ABCC13	lncRNA	54.5978	2.83013	0.339145	8.3449	7.13e-17	2.18e-15
ENSG00000237649	KIFC1	protein_coding	44.082	1.78654	0.214107	8.34414	7.17e-17	2.19e-15
ENSG00000119535	CSF3R	protein_coding	45339.6	-1.2279	0.147178	-8.343	7.24e-17	2.21e-15
ENSG00000198520	ARMH1	protein_coding	258.07	1.43087	0.171619	8.33751	7.59e-17	2.31e-15
ENSG00000215114	UBXN2B	protein_coding	1078.06	-1.05879	0.12701	-8.33626	7.67e-17	2.33e-15
ENSG00000063854	HAGH	protein_coding	4883.35	1.80491	0.216546	8.33498	7.75e-17	2.35e-15
ENSG00000168610	STAT3	protein_coding	3532.29	-0.789665	0.0947574	-8.33355	7.85e-17	2.38e-15
ENSG00000085831	TTC39A	protein_coding	56.5641	1.96192	0.235532	8.32973	8.1e-17	2.45e-15
ENSG00000105835	NAMPT	protein_coding	20376.4	-1.58736	0.190683	-8.3246	8.46e-17	2.56e-15
ENSG00000142303	ADAMTS10	protein_coding	214.349	1.46574	0.176097	8.32347	8.54e-17	2.58e-15
ENSG00000165406	MARCHF8	protein_coding	11374.5	1.90266	0.228616	8.32251	8.61e-17	2.6e-15
ENSG00000231868	ENSG00000231868	lncRNA	3.20917	5.65769	0.680223	8.31741	8.99e-17	2.71e-15
ENSG00000065154	OAT	protein_coding	771.35	1.24492	0.14981	8.31001	9.57e-17	2.88e-15
ENSG00000135378	PRRG4	protein_coding	360.21	-1.5584	0.18758	-8.30794	9.74e-17	2.93e-15
ENSG00000147394	ZNF185	protein_coding	485.493	-1.12259	0.135125	-8.3078	9.75e-17	2.93e-15
ENSG00000075218	GTSE1	protein_coding	25.7338	1.62598	0.195781	8.30512	9.97e-17	2.99e-15
ENSG00000166446	CDYL2	protein_coding	64.9269	-1.20962	0.145682	-8.30314	1.01e-16	3.04e-15
ENSG00000145911	N4BP3	protein_coding	69.7234	1.31769	0.158762	8.2998	1.04e-16	3.12e-15
ENSG00000235823	OLMALINC	lncRNA	25.5956	1.75506	0.211524	8.29724	1.07e-16	3.18e-15
ENSG00000073111	MCM2	protein_coding	112.809	1.54561	0.186394	8.29218	1.11e-16	3.32e-15
ENSG00000132964	CDK8	protein_coding	204.091	1.4305	0.172685	8.28391	1.19e-16	3.55e-15
ENSG00000027869	SH2D2A	protein_coding	246.887	-1.83306	0.221347	-8.28139	1.22e-16	3.63e-15
ENSG00000119865	CNRIP1	protein_coding	14.5994	2.55887	0.309186	8.27616	1.27e-16	3.78e-15
ENSG00000249215	NCOA4P4	processed_pseudogene	47.448	2.1612	0.261194	8.27431	1.29e-16	3.84e-15
ENSG00000288015	ENSG00000288015	lncRNA	4.41315	6.10624	0.738094	8.27298	1.31e-16	3.88e-15
ENSG00000135116	HRK	protein_coding	39.2199	3.00362	0.363189	8.27014	1.34e-16	3.97e-15
ENSG00000137193	PIM1	protein_coding	7080.82	1.32574	0.160342	8.2682	1.36e-16	4.03e-15
ENSG00000167768	KRT1	protein_coding	6468.06	3.30525	0.399806	8.26714	1.37e-16	4.06e-15
ENSG00000143333	RGS16	protein_coding	25.356	2.31804	0.280439	8.26577	1.39e-16	4.1e-15
ENSG00000165806	CASP7	protein_coding	164.456	-1.19259	0.14432	-8.26351	1.41e-16	4.17e-15
ENSG00000118473	SGIP1	protein_coding	107.595	3.1224	0.377876	8.26302	1.42e-16	4.19e-15
ENSG00000286010	ENSG00000286010	lncRNA	17.1508	-3.03682	0.367796	-8.25682	1.5e-16	4.4e-15
ENSG00000267440	LINC02594	lncRNA	6.2324	4.57652	0.554279	8.25671	1.5e-16	4.4e-15
ENSG00000141127	PRPSAP2	protein_coding	344.693	0.785063	0.0951006	8.25508	1.52e-16	4.46e-15
ENSG00000205531	NAP1L4	protein_coding	1813.42	0.703401	0.0852167	8.25426	1.53e-16	4.48e-15
ENSG00000253154	ENSG00000253154	lncRNA	16.3893	3.50644	0.424897	8.25246	1.55e-16	4.55e-15
ENSG00000114166	KAT2B	protein_coding	2593.83	1.43079	0.173388	8.25196	1.56e-16	4.56e-15
ENSG00000224144	ASH2LP1	processed_pseudogene	5.33921	5.41885	0.656949	8.24851	1.6e-16	4.69e-15
ENSG00000104904	OAZ1	protein_coding	31343.7	1.38278	0.167709	8.24517	1.65e-16	4.82e-15
ENSG00000183621	ZNF438	protein_coding	316.12	-1.14813	0.139303	-8.24196	1.69e-16	4.94e-15
ENSG00000257495	KRT73-AS1	lncRNA	26.1007	2.50046	0.303438	8.24043	1.72e-16	5e-15
ENSG00000160299	PCNT	protein_coding	551.822	1.05207	0.127684	8.23962	1.73e-16	5.03e-15
ENSG00000196517	SLC6A9	protein_coding	272.586	2.55653	0.310281	8.23941	1.73e-16	5.03e-15
ENSG00000259144	RANBP20P	processed_pseudogene	57.2745	-1.44645	0.175595	-8.23744	1.76e-16	5.11e-15
ENSG00000177374	HIC1	protein_coding	51.9594	-1.51334	0.183774	-8.23478	1.8e-16	5.22e-15
ENSG00000087586	AURKA	protein_coding	55.319	1.75836	0.213566	8.23336	1.82e-16	5.28e-15
ENSG00000149554	CHEK1	protein_coding	27.5706	1.50568	0.182905	8.23202	1.84e-16	5.33e-15
ENSG00000104341	LAPTM4B	protein_coding	86.2896	1.48774	0.180727	8.23195	1.84e-16	5.33e-15
ENSG00000288524	ENSG00000288524	lncRNA	44.5505	4.17805	0.50755	8.23179	1.84e-16	5.33e-15
ENSG00000112335	SNX3	protein_coding	4081.13	1.28006	0.155506	8.23159	1.85e-16	5.33e-15
ENSG00000111817	DSE	protein_coding	368.479	-1.24582	0.151458	-8.22553	1.94e-16	5.6e-15
ENSG00000144668	ITGA9	protein_coding	49.5723	2.57237	0.31281	8.22342	1.98e-16	5.69e-15
ENSG00000203747	FCGR3A	protein_coding	6320.48	-1.83694	0.223398	-8.22275	1.99e-16	5.72e-15
ENSG00000043093	DCUN1D1	protein_coding	1000.66	1.47872	0.179911	8.21919	2.05e-16	5.88e-15
ENSG00000128383	APOBEC3A	protein_coding	2284.55	-1.48116	0.180234	-8.21796	2.07e-16	5.94e-15
ENSG00000127954	STEAP4	protein_coding	2919.31	-1.50916	0.183687	-8.21596	2.1e-16	6.03e-15
ENSG00000166900	STX3	protein_coding	1957.45	-1.15775	0.140953	-8.21375	2.14e-16	6.14e-15
ENSG00000179978	NAIPP2	unprocessed_pseudogene	75.3494	-1.53341	0.186712	-8.21274	2.16e-16	6.18e-15
ENSG00000176890	TYMS	protein_coding	39.3204	1.79018	0.218014	8.21127	2.19e-16	6.25e-15
ENSG00000198909	MAP3K3	protein_coding	1828.98	-0.807948	0.0984837	-8.20387	2.33e-16	6.64e-15
ENSG00000173542	MOB1B	protein_coding	427.299	1.76326	0.214948	8.20319	2.34e-16	6.67e-15
ENSG00000213553	RPLP0P6	processed_pseudogene	555.664	1.08272	0.132013	8.20163	2.37e-16	6.75e-15
ENSG00000228956	SATB1-AS1	lncRNA	137.877	1.45397	0.177302	8.20049	2.39e-16	6.81e-15
ENSG00000103342	GSPT1	protein_coding	10203.9	1.87624	0.228846	8.1987	2.43e-16	6.9e-15
ENSG00000135749	PCNX2	protein_coding	116.679	-0.937424	0.114367	-8.19662	2.47e-16	7.01e-15
ENSG00000067048	DDX3Y	protein_coding	168.473	8.51387	1.03897	8.19452	2.52e-16	7.13e-15
ENSG00000204264	PSMB8	protein_coding	1946.53	-0.806199	0.0984022	-8.1929	2.55e-16	7.22e-15
ENSG00000187621	TCL6	lncRNA	61.3724	2.09027	0.255172	8.1916	2.58e-16	7.29e-15
ENSG00000171302	CANT1	protein_coding	1359.11	-0.809007	0.0987771	-8.19023	2.61e-16	7.36e-15
ENSG00000091490	SEL1L3	protein_coding	368.728	-1.05939	0.129365	-8.1892	2.63e-16	7.42e-15
ENSG00000225492	GBP1P1	transcribed_unprocessed_pseudogene	10.665	-4.20808	0.513886	-8.18875	2.64e-16	7.44e-15
ENSG00000168899	VAMP5	protein_coding	283.318	-1.48989	0.182178	-8.1782	2.88e-16	8.11e-15
ENSG00000153561	RMND5A	protein_coding	1827.27	1.19377	0.146022	8.17527	2.95e-16	8.3e-15
ENSG00000123096	SSPN	protein_coding	11.7654	-3.5109	0.429471	-8.17494	2.96e-16	8.32e-15
ENSG00000160593	JAML	protein_coding	11268.8	-0.879386	0.107627	-8.17065	3.07e-16	8.61e-15
ENSG00000226026	RWDD3-DT	lncRNA	11.1373	2.60067	0.318398	8.168	3.14e-16	8.79e-15
ENSG00000254802	ENSG00000254802	lncRNA	5.08906	-4.85712	0.594896	-8.16466	3.22e-16	9.03e-15
ENSG00000159217	IGF2BP1	protein_coding	12.8888	3.84317	0.470931	8.1608	3.33e-16	9.31e-15
ENSG00000173559	NABP1	protein_coding	1684.55	-1.77301	0.21727	-8.16039	3.34e-16	9.33e-15
ENSG00000151725	CENPU	protein_coding	31.5408	1.59535	0.195547	8.15838	3.4e-16	9.48e-15
ENSG00000093134	VNN3P	transcribed_unitary_pseudogene	521.074	-1.30034	0.159399	-8.15777	3.41e-16	9.52e-15
ENSG00000223969	ENSG00000223969	lncRNA	21.4286	-2.48533	0.304743	-8.1555	3.48e-16	9.68e-15
ENSG00000131747	TOP2A	protein_coding	109.137	1.53582	0.188355	8.15388	3.52e-16	9.8e-15
ENSG00000116199	FAM20B	protein_coding	602.987	1.07818	0.132251	8.15255	3.56e-16	9.9e-15
ENSG00000131242	RAB11FIP4	protein_coding	1046.21	-0.710798	0.0872481	-8.14687	3.73e-16	1.04e-14
ENSG00000196700	ZNF512B	protein_coding	185.756	1.06942	0.131278	8.14624	3.75e-16	1.04e-14
ENSG00000143891	GALM	protein_coding	147.139	-1.215	0.149171	-8.14502	3.79e-16	1.05e-14
ENSG00000091513	TF	protein_coding	44.4354	4.8693	0.597906	8.14393	3.83e-16	1.06e-14
ENSG00000126945	HNRNPH2	protein_coding	1377.8	-0.667597	0.081998	-8.14163	3.9e-16	1.08e-14
ENSG00000227191	TRGC2	TR_C_gene	322.599	-1.51933	0.186627	-8.14102	3.92e-16	1.08e-14
ENSG00000075420	FNDC3B	protein_coding	630.012	-1.25832	0.154706	-8.13364	4.17e-16	1.15e-14
ENSG00000187474	FPR3	protein_coding	17.4684	-3.08293	0.379122	-8.13177	4.23e-16	1.16e-14
ENSG00000135018	UBQLN1	protein_coding	1475.1	0.826136	0.101609	8.13057	4.27e-16	1.17e-14
ENSG00000170956	CEACAM3	protein_coding	1458.08	-1.07555	0.132326	-8.12804	4.36e-16	1.2e-14
ENSG00000161888	SPC24	protein_coding	21.8256	2.2947	0.282461	8.12397	4.51e-16	1.24e-14
ENSG00000076108	BAZ2A	protein_coding	1795.14	-0.754913	0.0929922	-8.11803	4.74e-16	1.3e-14
ENSG00000284543	LINC01226	lncRNA	8.87297	2.49946	0.308011	8.11484	4.86e-16	1.33e-14
ENSG00000290652	ENSG00000290652	lncRNA	4.09256	5.78477	0.712998	8.11331	4.93e-16	1.35e-14
ENSG00000186834	HEXIM1	protein_coding	1111.4	1.02324	0.126125	8.11288	4.94e-16	1.35e-14
ENSG00000281100	ENSG00000281100	TEC	23.149	-1.43558	0.176985	-8.1113	5.01e-16	1.37e-14
ENSG00000233030	ENSG00000233030	lncRNA	47.6752	-2.40069	0.296064	-8.1087	5.12e-16	1.39e-14
ENSG00000127540	UQCR11	protein_coding	141.03	0.942533	0.116255	8.1075	5.17e-16	1.41e-14
ENSG00000124788	ATXN1	protein_coding	615.965	-0.997261	0.123008	-8.10731	5.18e-16	1.41e-14
ENSG00000110841	PPFIBP1	protein_coding	26.878	1.65831	0.204546	8.10727	5.18e-16	1.41e-14
ENSG00000143416	SELENBP1	protein_coding	13686.7	2.21801	0.273621	8.10613	5.23e-16	1.42e-14
ENSG00000214922	HLA-F-AS1	lncRNA	17.4447	-2.25154	0.277834	-8.10388	5.32e-16	1.44e-14
ENSG00000197852	INKA2	protein_coding	1923.31	-0.972435	0.120021	-8.10219	5.4e-16	1.46e-14
ENSG00000118564	FBXL5	protein_coding	3246.19	-0.939791	0.116056	-8.09773	5.6e-16	1.52e-14
ENSG00000112062	MAPK14	protein_coding	2554.2	-0.938024	0.115843	-8.0974	5.61e-16	1.52e-14
ENSG00000185753	CXorf38	protein_coding	699.369	-0.728	0.089927	-8.09546	5.7e-16	1.54e-14
ENSG00000116044	NFE2L2	protein_coding	929.416	-0.682941	0.084395	-8.0922	5.86e-16	1.58e-14
ENSG00000143167	GPA33	protein_coding	127.945	1.46034	0.180506	8.09023	5.96e-16	1.6e-14
ENSG00000165801	ARHGEF40	protein_coding	879.992	-1.09431	0.135268	-8.08993	5.97e-16	1.61e-14
ENSG00000180539	LINC02908	lncRNA	325.65	-1.02555	0.126878	-8.08293	6.32e-16	1.7e-14
ENSG00000073921	PICALM	protein_coding	4154.57	-1.00247	0.124052	-8.08106	6.42e-16	1.72e-14
ENSG00000244649	LINC02086	lncRNA	5.41396	-5.36541	0.664164	-8.07844	6.56e-16	1.76e-14
ENSG00000188070	ZFTA	protein_coding	69.9766	1.05289	0.130373	8.07593	6.7e-16	1.8e-14
ENSG00000084234	APLP2	protein_coding	5334.86	-0.77009	0.0953667	-8.07504	6.75e-16	1.81e-14
ENSG00000152495	CAMK4	protein_coding	638.644	1.24096	0.153691	8.07441	6.78e-16	1.81e-14
ENSG00000161643	SIGLEC16	protein_coding	51.7213	-1.62699	0.20159	-8.07078	6.98e-16	1.87e-14
ENSG00000100938	GMPR2	protein_coding	470.617	-0.68781	0.0852323	-8.06983	7.04e-16	1.88e-14
ENSG00000007402	CACNA2D2	protein_coding	52.8712	-1.83101	0.226908	-8.0694	7.06e-16	1.88e-14
ENSG00000091409	ITGA6	protein_coding	508.718	1.03307	0.128035	8.06865	7.11e-16	1.89e-14
ENSG00000234465	PINLYP	protein_coding	11.0322	2.18278	0.270642	8.06519	7.31e-16	1.95e-14
ENSG00000144331	ZNF385B	protein_coding	6.95748	3.63996	0.451584	8.06043	7.6e-16	2.02e-14
ENSG00000130830	MPP1	protein_coding	8320.93	1.62079	0.20112	8.05881	7.7e-16	2.05e-14
ENSG00000203710	CR1	protein_coding	1976.8	-1.30369	0.161778	-8.05847	7.73e-16	2.05e-14
ENSG00000179271	GADD45GIP1	protein_coding	328.822	1.56745	0.194531	8.05758	7.78e-16	2.06e-14
ENSG00000163755	HPS3	protein_coding	256.231	-0.588619	0.0730531	-8.05741	7.79e-16	2.06e-14
ENSG00000239219	ENSG00000239219	lncRNA	15.1464	2.91674	0.362128	8.05443	7.98e-16	2.11e-14
ENSG00000279884	ENSG00000279884	TEC	52.0955	-1.34604	0.167201	-8.05044	8.25e-16	2.18e-14
ENSG00000255197	ENSG00000255197	lncRNA	1152.24	-1.04712	0.130074	-8.05018	8.27e-16	2.18e-14
ENSG00000112425	EPM2A	protein_coding	86.3181	1.62242	0.201577	8.04864	8.37e-16	2.21e-14
ENSG00000240403	KIR3DL2	protein_coding	24.5124	-3.43007	0.42626	-8.0469	8.49e-16	2.24e-14
ENSG00000166889	PATL1	protein_coding	600.428	-0.701324	0.0872284	-8.04009	8.98e-16	2.36e-14
ENSG00000276136	ENSG00000276136	lncRNA	82.2209	-1.76206	0.219162	-8.04	8.98e-16	2.36e-14
ENSG00000115935	WIPF1	protein_coding	5311.74	-0.790718	0.0983719	-8.03805	9.13e-16	2.39e-14
ENSG00000102760	RGCC	protein_coding	683.557	1.62618	0.202312	8.03798	9.13e-16	2.39e-14
ENSG00000171954	CYP4F22	protein_coding	17.6325	-2.86326	0.356217	-8.03797	9.13e-16	2.39e-14
ENSG00000012817	KDM5D	protein_coding	175.612	9.26362	1.15255	8.03747	9.17e-16	2.4e-14
ENSG00000076513	ANKRD13A	protein_coding	1956.78	-0.686393	0.0854043	-8.03698	9.21e-16	2.41e-14
ENSG00000146592	CREB5	protein_coding	2094.42	-1.70863	0.212814	-8.02871	9.85e-16	2.57e-14
ENSG00000057704	TMCC3	protein_coding	643.332	-1.12869	0.140587	-8.02842	9.87e-16	2.57e-14
ENSG00000197283	SYNGAP1	protein_coding	342.845	0.870295	0.108407	8.02802	9.91e-16	2.58e-14
ENSG00000176485	PLAAT3	protein_coding	79.0759	-1.55798	0.194127	-8.0256	1.01e-15	2.63e-14
ENSG00000225506	CYP4A22-AS1	lncRNA	9.01609	2.96312	0.36947	8.01994	1.06e-15	2.75e-14
ENSG00000011590	ZBTB32	protein_coding	12.0804	-2.60313	0.324583	-8.0199	1.06e-15	2.75e-14
ENSG00000174358	SLC6A19	protein_coding	88.132	4.18835	0.522335	8.01851	1.07e-15	2.78e-14
ENSG00000160360	GPSM1	protein_coding	57.2266	1.6345	0.204123	8.00743	1.17e-15	3.04e-14
ENSG00000004939	SLC4A1	protein_coding	43420.1	2.02281	0.252625	8.00717	1.17e-15	3.04e-14
ENSG00000223749	MIR503HG	lncRNA	13.466	2.59073	0.323559	8.007	1.18e-15	3.04e-14
ENSG00000105088	OLFM2	protein_coding	109.772	1.16788	0.145876	8.00592	1.19e-15	3.06e-14
ENSG00000172965	MIR4435-2HG	lncRNA	226.707	-1.03254	0.129015	-8.0033	1.21e-15	3.13e-14
ENSG00000183111	ARHGEF37	protein_coding	130.544	2.28204	0.285202	8.00148	1.23e-15	3.17e-14
ENSG00000122694	GLIPR2	protein_coding	2828.97	-0.768397	0.0960372	-8.00103	1.23e-15	3.18e-14
ENSG00000068784	SRBD1	protein_coding	168.829	-0.924423	0.115539	-8.00099	1.23e-15	3.18e-14
ENSG00000149177	PTPRJ	protein_coding	3610.2	-0.981537	0.122686	-8.00038	1.24e-15	3.19e-14
ENSG00000179044	EXOC3L1	protein_coding	20.2636	-2.43443	0.304389	-7.99774	1.27e-15	3.26e-14
ENSG00000130600	H19	lncRNA	103.813	4.30176	0.537999	7.99586	1.29e-15	3.3e-14
ENSG00000204160	ZDHHC18	protein_coding	4716.91	-1.02803	0.128587	-7.99486	1.3e-15	3.33e-14
ENSG00000083223	TUT7	protein_coding	1376.64	-1.10892	0.138862	-7.9858	1.4e-15	3.57e-14
ENSG00000251129	LINC02506	lncRNA	56.985	3.96654	0.496704	7.98573	1.4e-15	3.57e-14
ENSG00000169180	XPO6	protein_coding	8088.45	-1.09689	0.137384	-7.98409	1.42e-15	3.62e-14
ENSG00000269404	SPIB	protein_coding	155.662	1.48448	0.18599	7.98149	1.45e-15	3.69e-14
ENSG00000136040	PLXNC1	protein_coding	3542.18	-1.39	0.174202	-7.97921	1.47e-15	3.76e-14
ENSG00000204642	HLA-F	protein_coding	2245.86	-1.28429	0.16099	-7.97741	1.49e-15	3.81e-14
ENSG00000180628	PCGF5	protein_coding	4430.19	1.35447	0.169802	7.97673	1.5e-15	3.83e-14
ENSG00000122966	CIT	protein_coding	31.3837	1.70077	0.213235	7.97603	1.51e-15	3.84e-14
ENSG00000183765	CHEK2	protein_coding	61.4565	0.977193	0.122582	7.97177	1.56e-15	3.97e-14
ENSG00000171916	LGALS9C	protein_coding	55.0877	-2.46944	0.309835	-7.9702	1.58e-15	4.02e-14
ENSG00000173153	ESRRA	protein_coding	556.971	-0.692561	0.0869253	-7.96731	1.62e-15	4.11e-14
ENSG00000125462	MIR9-1HG	lncRNA	9.64534	-3.51778	0.441531	-7.96723	1.62e-15	4.11e-14
ENSG00000267278	MAP3K14-AS1	lncRNA	65.6118	1.05174	0.132019	7.96662	1.63e-15	4.13e-14
ENSG00000003402	CFLAR	protein_coding	6178.71	-0.968278	0.121561	-7.9654	1.65e-15	4.16e-14
ENSG00000117758	STX12	protein_coding	390.257	-0.738968	0.0927744	-7.96522	1.65e-15	4.17e-14
ENSG00000103005	USB1	protein_coding	1178.13	-1.02022	0.128118	-7.96314	1.68e-15	4.23e-14
ENSG00000109118	PHF12	protein_coding	1052.28	-0.739332	0.0928454	-7.96304	1.68e-15	4.23e-14
ENSG00000162512	SDC3	protein_coding	49.1239	-1.95424	0.245513	-7.9598	1.72e-15	4.34e-14
ENSG00000268119	ENSG00000268119	lncRNA	65.3831	2.25216	0.282979	7.95876	1.74e-15	4.37e-14
ENSG00000187017	ESPN	protein_coding	864.836	2.36966	0.297777	7.95784	1.75e-15	4.4e-14
ENSG00000232368	FTLP2	processed_pseudogene	78.9187	1.45071	0.182338	7.95615	1.77e-15	4.46e-14
ENSG00000256262	USP30-AS1	lncRNA	11.5874	-2.50566	0.315092	-7.95214	1.83e-15	4.6e-14
ENSG00000065978	YBX1	protein_coding	17674.1	1.33444	0.167893	7.9482	1.89e-15	4.74e-14
ENSG00000164715	LMTK2	protein_coding	400.769	-1.16026	0.145997	-7.9472	1.91e-15	4.78e-14
ENSG00000005238	ATOSB	protein_coding	2178.68	1.13671	0.143056	7.94592	1.93e-15	4.82e-14
ENSG00000118689	FOXO3	protein_coding	3183.94	1.44868	0.182357	7.94419	1.95e-15	4.88e-14
ENSG00000169083	AR	protein_coding	7.55499	2.50469	0.315294	7.94397	1.96e-15	4.89e-14
ENSG00000183943	PRKX	protein_coding	534.391	-0.863426	0.108719	-7.94181	1.99e-15	4.97e-14
ENSG00000171502	COL24A1	protein_coding	12.2311	2.59193	0.326382	7.94142	2e-15	4.98e-14
ENSG00000204178	MACO1	protein_coding	416.174	1.08408	0.136547	7.93923	2.03e-15	5.06e-14
ENSG00000234614	C2CD4D-AS1	lncRNA	7.67129	-3.49045	0.439687	-7.93848	2.05e-15	5.09e-14
ENSG00000163106	HPGDS	protein_coding	9.97838	2.91242	0.367305	7.92917	2.21e-15	5.48e-14
ENSG00000166508	MCM7	protein_coding	874.53	0.860072	0.10855	7.92329	2.31e-15	5.74e-14
ENSG00000187535	IFT140	protein_coding	69.1383	1.29433	0.163404	7.92108	2.35e-15	5.84e-14
ENSG00000165568	AKR1E2	protein_coding	13.4051	2.19497	0.27733	7.91465	2.48e-15	6.14e-14
ENSG00000197622	CDC42SE1	protein_coding	6617.62	-0.709138	0.0896111	-7.91351	2.5e-15	6.19e-14
ENSG00000196358	NTNG2	protein_coding	458.143	-1.40768	0.177956	-7.91024	2.57e-15	6.35e-14
ENSG00000223629	DEFA8P	unprocessed_pseudogene	30.4512	4.42079	0.559	7.90839	2.61e-15	6.44e-14
ENSG00000133687	TMTC1	protein_coding	46.7463	-3.18554	0.402884	-7.90684	2.64e-15	6.51e-14
ENSG00000187266	EPOR	protein_coding	312.919	1.13206	0.143175	7.90681	2.64e-15	6.51e-14
ENSG00000223298	RNY3P8	misc_RNA	7.76288	3.02316	0.382471	7.90429	2.69e-15	6.64e-14
ENSG00000133454	MYO18B	protein_coding	11.9188	3.22393	0.408027	7.90127	2.76e-15	6.79e-14
ENSG00000139517	LNX2	protein_coding	161.621	1.57666	0.199553	7.90095	2.77e-15	6.8e-14
ENSG00000140941	MAP1LC3B	protein_coding	2309.11	0.918523	0.116271	7.89985	2.79e-15	6.85e-14
ENSG00000168028	RPSA	protein_coding	7925.75	0.844319	0.106892	7.89878	2.82e-15	6.9e-14
ENSG00000026559	KCNG1	protein_coding	10.2838	-4.91989	0.622911	-7.89822	2.83e-15	6.93e-14
ENSG00000257108	NHLRC4	protein_coding	36.1772	1.82954	0.231677	7.89696	2.86e-15	6.99e-14
ENSG00000129824	RPS4Y1	protein_coding	259.651	9.29806	1.17747	7.89664	2.87e-15	7e-14
ENSG00000007312	CD79B	protein_coding	492.003	1.46742	0.185851	7.89571	2.89e-15	7.05e-14
ENSG00000163545	NUAK2	protein_coding	1131.99	-0.880684	0.11156	-7.89427	2.92e-15	7.13e-14
ENSG00000246363	LINC02458	lncRNA	10.977	2.47584	0.313658	7.89344	2.94e-15	7.17e-14
ENSG00000198959	TGM2	protein_coding	705.673	1.70675	0.216257	7.89225	2.97e-15	7.23e-14
ENSG00000088930	XRN2	protein_coding	1452.71	-0.598346	0.0758288	-7.89074	3e-15	7.31e-14
ENSG00000070526	ST6GALNAC1	protein_coding	17.8228	2.23024	0.282655	7.89033	3.01e-15	7.33e-14
ENSG00000279161	ENSG00000279161	TEC	15.2349	2.404	0.304736	7.88881	3.05e-15	7.4e-14
ENSG00000136379	ABHD17C	protein_coding	19.2906	-1.74479	0.221174	-7.88879	3.05e-15	7.4e-14
ENSG00000151883	PARP8	protein_coding	1612.18	-0.996381	0.126317	-7.88796	3.07e-15	7.45e-14
ENSG00000281501	SEPSECS-AS1	lncRNA	68.457	1.60603	0.203754	7.88223	3.22e-15	7.78e-14
ENSG00000154122	ANKH	protein_coding	2400.88	1.58736	0.201447	7.8798	3.28e-15	7.93e-14
ENSG00000142937	RPS8	protein_coding	5920.82	0.821967	0.104326	7.87886	3.3e-15	7.98e-14
ENSG00000122085	MTERF4	protein_coding	360.134	0.635755	0.080742	7.87391	3.44e-15	8.29e-14
ENSG00000161533	ACOX1	protein_coding	1098.73	-0.963004	0.122369	-7.86968	3.56e-15	8.57e-14
ENSG00000184481	FOXO4	protein_coding	5379.32	1.50864	0.191716	7.86914	3.57e-15	8.6e-14
ENSG00000203797	DDO	protein_coding	9.51679	-3.34518	0.425212	-7.86709	3.63e-15	8.73e-14
ENSG00000127951	FGL2	protein_coding	6614.26	-1.35764	0.172581	-7.86671	3.64e-15	8.75e-14
ENSG00000169679	BUB1	protein_coding	47.1258	1.32442	0.168517	7.8593	3.86e-15	9.28e-14
ENSG00000242265	PEG10	protein_coding	26.6561	2.19345	0.279152	7.85756	3.92e-15	9.4e-14
ENSG00000171552	BCL2L1	protein_coding	19608.6	1.98402	0.252523	7.85678	3.94e-15	9.45e-14
ENSG00000160318	CLDND2	protein_coding	70.5546	-2.10221	0.267619	-7.85522	3.99e-15	9.56e-14
ENSG00000198216	CACNA1E	protein_coding	124.303	-2.15339	0.274149	-7.85483	4e-15	9.58e-14
ENSG00000169744	LDB2	protein_coding	12.9028	2.29386	0.29209	7.85329	4.05e-15	9.69e-14
ENSG00000237484	LINC01684	lncRNA	4.44826	-4.89805	0.624072	-7.84853	4.21e-15	1.01e-13
ENSG00000143627	PKLR	protein_coding	5.34314	4.30344	0.548493	7.84594	4.3e-15	1.03e-13
ENSG00000143226	FCGR2A	protein_coding	6012.2	-1.2029	0.153389	-7.84216	4.43e-15	1.06e-13
ENSG00000162367	TAL1	protein_coding	1275.21	1.90144	0.242531	7.83999	4.51e-15	1.07e-13
ENSG00000080819	CPOX	protein_coding	274.729	1.22539	0.156307	7.83965	4.52e-15	1.07e-13
ENSG00000166669	ATF7IP2	protein_coding	173.815	1.10931	0.141502	7.83954	4.52e-15	1.07e-13
ENSG00000148411	NACC2	protein_coding	701.817	-0.962568	0.122832	-7.83647	4.63e-15	1.1e-13
ENSG00000273824	ENSG00000273824	lncRNA	16.1566	-2.52513	0.322357	-7.83332	4.75e-15	1.13e-13
ENSG00000141551	CSNK1D	protein_coding	1969.63	-0.650034	0.0830154	-7.83029	4.87e-15	1.15e-13
ENSG00000157303	SUSD3	protein_coding	365.317	1.30076	0.166183	7.82727	4.99e-15	1.18e-13
ENSG00000287385	ENSG00000287385	lncRNA	15.9093	1.46344	0.186986	7.82648	5.02e-15	1.19e-13
ENSG00000163659	TIPARP	protein_coding	276.518	-0.770983	0.0985186	-7.82576	5.05e-15	1.19e-13
ENSG00000139318	DUSP6	protein_coding	993.888	-0.898325	0.114857	-7.82126	5.23e-15	1.24e-13
ENSG00000197561	ELANE	protein_coding	628.392	3.82285	0.488917	7.81902	5.32e-15	1.26e-13
ENSG00000197535	MYO5A	protein_coding	538.092	-1.05977	0.135605	-7.81515	5.49e-15	1.29e-13
ENSG00000186529	CYP4F3	protein_coding	1605.51	-1.55091	0.198507	-7.81288	5.59e-15	1.32e-13
ENSG00000259097	ENSG00000259097	lncRNA	19.6864	2.85517	0.365506	7.81154	5.65e-15	1.33e-13
ENSG00000198967	OR10Z1	protein_coding	7.46756	4.73748	0.606498	7.81121	5.66e-15	1.33e-13
ENSG00000261371	PECAM1	protein_coding	6767.66	-0.862709	0.110458	-7.81025	5.71e-15	1.34e-13
ENSG00000116741	RGS2	protein_coding	5677.14	-1.22798	0.157312	-7.80602	5.9e-15	1.39e-13
ENSG00000231160	KLF3-AS1	lncRNA	51.4276	1.38279	0.177158	7.80541	5.93e-15	1.39e-13
ENSG00000025708	TYMP	protein_coding	4220.69	-1.37225	0.175824	-7.80464	5.97e-15	1.4e-13
ENSG00000110934	BIN2	protein_coding	4769.93	-0.661422	0.0847486	-7.80451	5.97e-15	1.4e-13
ENSG00000205089	CCNI2	protein_coding	18.4252	1.5741	0.201714	7.80363	6.02e-15	1.41e-13
ENSG00000177383	MAGEF1	protein_coding	96.1671	0.788696	0.101088	7.80211	6.09e-15	1.42e-13
ENSG00000101928	MOSPD1	protein_coding	176.176	1.6643	0.213366	7.8002	6.18e-15	1.44e-13
ENSG00000172889	EGFL7	protein_coding	77.4433	1.96163	0.251499	7.79972	6.2e-15	1.45e-13
ENSG00000154655	L3MBTL4	protein_coding	8.29965	-3.84589	0.493097	-7.79946	6.22e-15	1.45e-13
ENSG00000168310	IRF2	protein_coding	1494.16	-0.640806	0.0822109	-7.79466	6.46e-15	1.5e-13
ENSG00000166226	CCT2	protein_coding	577.101	0.879583	0.112889	7.79158	6.62e-15	1.54e-13
ENSG00000232022	FAAHP1	transcribed_unprocessed_pseudogene	4.96925	-4.63218	0.594553	-7.79104	6.65e-15	1.54e-13
ENSG00000163823	CCR1	protein_coding	1626.23	-1.24309	0.159584	-7.78957	6.72e-15	1.56e-13
ENSG00000237977	EIF4HP2	processed_pseudogene	20.0273	2.207	0.283394	7.78773	6.82e-15	1.58e-13
ENSG00000173369	C1QB	protein_coding	62.6835	-3.94098	0.506084	-7.78721	6.85e-15	1.59e-13
ENSG00000186827	TNFRSF4	protein_coding	31.5451	-1.86053	0.239164	-7.7793	7.29e-15	1.69e-13
ENSG00000172348	RCAN2	protein_coding	6.83937	-4.6692	0.600638	-7.77374	7.62e-15	1.76e-13
ENSG00000173898	SPTBN2	protein_coding	16.1774	2.16004	0.277904	7.77261	7.69e-15	1.78e-13
ENSG00000129691	ASH2L	protein_coding	765.428	0.783613	0.100831	7.77155	7.75e-15	1.79e-13
ENSG00000172878	METAP1D	protein_coding	42.3399	1.08634	0.139793	7.77109	7.78e-15	1.79e-13
ENSG00000148926	ADM	protein_coding	692.714	-1.53597	0.197666	-7.77054	7.82e-15	1.8e-13
ENSG00000230615	ENSG00000230615	lncRNA	199.046	1.83625	0.236368	7.76861	7.94e-15	1.83e-13
ENSG00000241990	PRR34-AS1	lncRNA	9.96559	-3.00333	0.38661	-7.76836	7.95e-15	1.83e-13
ENSG00000118257	NRP2	protein_coding	19.2521	1.9875	0.255899	7.76672	8.05e-15	1.85e-13
ENSG00000160932	LY6E	protein_coding	1607.06	-1.62834	0.209675	-7.76602	8.1e-15	1.86e-13
ENSG00000137462	TLR2	protein_coding	2857.26	-1.1234	0.144752	-7.76084	8.44e-15	1.94e-13
ENSG00000173110	HSPA6	protein_coding	2058.97	-1.18653	0.152913	-7.75948	8.53e-15	1.95e-13
ENSG00000008130	NADK	protein_coding	4852.6	-0.866166	0.111637	-7.75875	8.58e-15	1.96e-13
ENSG00000241886	ENSG00000241886	lncRNA	35.231	-1.833	0.236262	-7.75835	8.6e-15	1.97e-13
ENSG00000136002	ARHGEF4	protein_coding	30.2771	1.60727	0.207199	7.75714	8.69e-15	1.99e-13
ENSG00000225342	LRRK2-DT	lncRNA	79.1975	-1.39933	0.180452	-7.75462	8.86e-15	2.02e-13
ENSG00000118217	ATF6	protein_coding	1142.93	-0.828313	0.106828	-7.75373	8.92e-15	2.04e-13
ENSG00000288700	ENSG00000288700	lncRNA	72.2658	-1.49029	0.192329	-7.74863	9.29e-15	2.12e-13
ENSG00000095002	MSH2	protein_coding	217.757	0.918601	0.118566	7.74761	9.36e-15	2.13e-13
ENSG00000160013	PTGIR	protein_coding	247.495	1.35855	0.175559	7.73845	1.01e-14	2.29e-13
ENSG00000067182	TNFRSF1A	protein_coding	4043.14	-1.05068	0.135781	-7.73805	1.01e-14	2.3e-13
ENSG00000172270	BSG	protein_coding	24592.8	1.79429	0.232044	7.73255	1.05e-14	2.4e-13
ENSG00000140416	TPM1	protein_coding	330.065	1.21054	0.156564	7.73193	1.06e-14	2.4e-13
ENSG00000215788	TNFRSF25	protein_coding	645.552	1.01253	0.130973	7.7308	1.07e-14	2.42e-13
ENSG00000049860	HEXB	protein_coding	802.9	-0.67722	0.0876098	-7.72996	1.08e-14	2.44e-13
ENSG00000269887	ENSG00000269887	lncRNA	60.8744	2.59235	0.335415	7.72878	1.09e-14	2.46e-13
ENSG00000153044	CENPH	protein_coding	42.5006	1.24283	0.160815	7.72833	1.09e-14	2.47e-13
ENSG00000124006	OBSL1	protein_coding	11.2304	2.52877	0.327313	7.72585	1.11e-14	2.51e-13
ENSG00000160298	C21orf58	protein_coding	70.8586	1.30009	0.168286	7.72546	1.11e-14	2.52e-13
ENSG00000134323	MYCN	protein_coding	8.62126	3.11962	0.404062	7.72065	1.16e-14	2.61e-13
ENSG00000147432	CHRNB3	protein_coding	3.06895	4.79355	0.620963	7.71953	1.17e-14	2.63e-13
ENSG00000272282	LINC02084	lncRNA	34.527	-2.08398	0.270038	-7.71734	1.19e-14	2.67e-13
ENSG00000173281	PPP1R3B	protein_coding	1565.89	-1.45088	0.188003	-7.71731	1.19e-14	2.67e-13
ENSG00000165698	SPACA9	protein_coding	23.402	1.53188	0.198513	7.7168	1.19e-14	2.68e-13
ENSG00000287100	ENSG00000287100	lncRNA	42.0715	1.95546	0.253663	7.70891	1.27e-14	2.85e-13
ENSG00000255101	ENSG00000255101	lncRNA	5.17993	4.28341	0.555702	7.70812	1.28e-14	2.86e-13
ENSG00000085840	ORC1	protein_coding	27.9462	1.49527	0.194063	7.70507	1.31e-14	2.93e-13
ENSG00000291144	ENSG00000291144	lncRNA	95.1733	-1.38275	0.179461	-7.70502	1.31e-14	2.93e-13
ENSG00000182557	SPNS3	protein_coding	120.194	1.64781	0.213868	7.70479	1.31e-14	2.93e-13
ENSG00000183762	KREMEN1	protein_coding	821.345	-1.71719	0.223064	-7.69822	1.38e-14	3.08e-13
ENSG00000197646	PDCD1LG2	protein_coding	12.1145	-3.31703	0.430998	-7.69616	1.4e-14	3.13e-13
ENSG00000229056	HECW2-AS1	lncRNA	16.7232	2.2595	0.293752	7.69187	1.45e-14	3.23e-13
ENSG00000170954	ZNF415	protein_coding	17.7091	2.07848	0.270399	7.68672	1.51e-14	3.36e-13
ENSG00000181104	F2R	protein_coding	135.603	-1.60458	0.208769	-7.68589	1.52e-14	3.38e-13
ENSG00000134905	CARS2	protein_coding	1090.6	-0.690607	0.0898645	-7.68499	1.53e-14	3.4e-13
ENSG00000099725	PRKY	transcribed_unitary_pseudogene	117.451	6.74224	0.877512	7.68336	1.55e-14	3.44e-13
ENSG00000249437	NAIP	protein_coding	347.456	-1.5249	0.19847	-7.6833	1.55e-14	3.44e-13
ENSG00000105656	ELL	protein_coding	701.932	-1.00425	0.130752	-7.68056	1.58e-14	3.51e-13
ENSG00000226312	CFLAR-AS1	lncRNA	46.4089	-1.46294	0.190508	-7.67912	1.6e-14	3.55e-13
ENSG00000162383	SLC1A7	protein_coding	18.958	-3.91414	0.509866	-7.6768	1.63e-14	3.61e-13
ENSG00000143476	DTL	protein_coding	27.2345	1.61257	0.21009	7.67559	1.65e-14	3.64e-13
ENSG00000231528	FAM225A	lncRNA	10.4426	-3.08274	0.401673	-7.67477	1.66e-14	3.66e-13
ENSG00000115687	PASK	protein_coding	330.378	1.52732	0.199101	7.6711	1.71e-14	3.77e-13
ENSG00000196968	FUT11	protein_coding	200.601	-1.02347	0.133437	-7.67009	1.72e-14	3.79e-13
ENSG00000171049	FPR2	protein_coding	3296.68	-1.21962	0.159026	-7.66935	1.73e-14	3.81e-13
ENSG00000214456	PLIN5	protein_coding	279.57	-1.3029	0.169905	-7.6684	1.74e-14	3.84e-13
ENSG00000152291	TGOLN2	protein_coding	3307.06	-0.753455	0.0982928	-7.66541	1.78e-14	3.92e-13
ENSG00000196141	SPATS2L	protein_coding	48.3272	-1.51222	0.197373	-7.66173	1.83e-14	4.03e-13
ENSG00000249245	NCOA4P3	processed_pseudogene	32.7439	2.00014	0.26116	7.6587	1.88e-14	4.13e-13
ENSG00000176014	TUBB6	protein_coding	128.484	1.77787	0.232177	7.65738	1.9e-14	4.17e-13
ENSG00000213468	FIRRE	lncRNA	21.2927	2.05136	0.267944	7.65593	1.92e-14	4.21e-13
ENSG00000232815	DUX4L50	unprocessed_pseudogene	114.984	-1.09953	0.143664	-7.65348	1.96e-14	4.29e-13
ENSG00000162738	VANGL2	protein_coding	6.34619	2.96184	0.387023	7.65287	1.97e-14	4.3e-13
ENSG00000039068	CDH1	protein_coding	33.5902	2.17774	0.284584	7.65234	1.97e-14	4.32e-13
ENSG00000184221	OLIG1	protein_coding	231.266	1.41592	0.185331	7.63999	2.17e-14	4.75e-13
ENSG00000141298	SSH2	protein_coding	3897.89	-1.03237	0.135289	-7.63086	2.33e-14	5.09e-13
ENSG00000265531	FCGR1CP	unprocessed_pseudogene	111.45	-2.09341	0.274356	-7.63028	2.34e-14	5.11e-13
ENSG00000087157	PGS1	protein_coding	1301.26	-1.10187	0.144444	-7.62835	2.38e-14	5.18e-13
ENSG00000130303	BST2	protein_coding	1065.07	-1.24311	0.162984	-7.62721	2.4e-14	5.23e-13
ENSG00000117560	FASLG	protein_coding	85.7593	-2.11572	0.277402	-7.62693	2.4e-14	5.23e-13
ENSG00000274173	LINC02967	lncRNA	91.036	-1.97308	0.2588	-7.62398	2.46e-14	5.35e-13
ENSG00000163412	EIF4E3	protein_coding	983.574	-1.11978	0.14688	-7.62379	2.46e-14	5.35e-13
ENSG00000277586	NEFL	protein_coding	6.98536	-4.53904	0.59557	-7.62132	2.51e-14	5.45e-13
ENSG00000141337	ARSG	protein_coding	187.005	-0.830715	0.10904	-7.61841	2.57e-14	5.57e-13
ENSG00000166347	CYB5A	protein_coding	151.479	1.07822	0.141543	7.61761	2.58e-14	5.6e-13
ENSG00000150093	ITGB1	protein_coding	1439.34	-0.927533	0.121807	-7.61476	2.64e-14	5.72e-13
ENSG00000211710	TRBV4-1	TR_V_gene	72.8895	1.45434	0.19123	7.60519	2.84e-14	6.15e-13
ENSG00000099985	OSM	protein_coding	80.7477	-1.56839	0.20625	-7.60433	2.86e-14	6.19e-13
ENSG00000089063	TMEM230	protein_coding	724.551	0.652506	0.085828	7.60248	2.91e-14	6.27e-13
ENSG00000029993	HMGB3	protein_coding	57.3685	1.55584	0.204652	7.60237	2.91e-14	6.27e-13
ENSG00000141570	CBX8	protein_coding	73.7941	0.859158	0.113059	7.59921	2.98e-14	6.42e-13
ENSG00000008516	MMP25	protein_coding	5014.96	-1.16339	0.153101	-7.59881	2.99e-14	6.43e-13
ENSG00000185862	EVI2B	protein_coding	6068.76	-0.887396	0.116834	-7.59536	3.07e-14	6.6e-13
ENSG00000196220	SRGAP3	protein_coding	21.3822	1.90036	0.25024	7.59417	3.1e-14	6.66e-13
ENSG00000103111	MON1B	protein_coding	676.969	-0.605768	0.0797843	-7.59257	3.14e-14	6.73e-13
ENSG00000130779	CLIP1	protein_coding	600.358	-0.895686	0.117975	-7.59216	3.15e-14	6.75e-13
ENSG00000197721	CR1L	protein_coding	95.8873	1.85159	0.243952	7.58997	3.2e-14	6.86e-13
ENSG00000259803	SLC22A31	protein_coding	8.44802	3.29842	0.434629	7.58904	3.22e-14	6.9e-13
ENSG00000197763	TXNRD3	protein_coding	17.1827	1.67911	0.221297	7.58759	3.26e-14	6.98e-13
ENSG00000131979	GCH1	protein_coding	465.159	-1.15989	0.152927	-7.58458	3.34e-14	7.13e-13
ENSG00000170776	AKAP13	protein_coding	2480.33	-0.687777	0.0906898	-7.58384	3.35e-14	7.17e-13
ENSG00000243646	IL10RB	protein_coding	99.227	-1.31465	0.173394	-7.58188	3.41e-14	7.27e-13
ENSG00000270379	HEATR9	protein_coding	9.41776	-3.31435	0.437339	-7.57845	3.5e-14	7.46e-13
ENSG00000105393	BABAM1	protein_coding	554.652	1.45002	0.191469	7.57315	3.64e-14	7.76e-13
ENSG00000288531	ENSG00000288531	lncRNA	6.68384	3.56992	0.471395	7.57309	3.64e-14	7.76e-13
ENSG00000169228	RAB24	protein_coding	353.847	-0.933906	0.123332	-7.57228	3.67e-14	7.8e-13
ENSG00000144401	METTL21A	protein_coding	138.084	0.812281	0.107279	7.57165	3.69e-14	7.84e-13
ENSG00000121297	TSHZ3	protein_coding	117.943	-1.23998	0.163815	-7.56937	3.75e-14	7.97e-13
ENSG00000102034	ELF4	protein_coding	1319.2	-0.836588	0.11056	-7.56686	3.82e-14	8.12e-13
ENSG00000180198	RCC1	protein_coding	195.2	0.738918	0.097694	7.5636	3.92e-14	8.32e-13
ENSG00000004660	CAMKK1	protein_coding	286.169	-1.00809	0.133294	-7.56291	3.94e-14	8.35e-13
ENSG00000164684	ZNF704	protein_coding	7.39144	2.9258	0.386907	7.56202	3.97e-14	8.4e-13
ENSG00000133961	NUMB	protein_coding	2282.86	-0.94819	0.125434	-7.55926	4.05e-14	8.58e-13
ENSG00000256043	CTSO	protein_coding	303.588	-0.72738	0.0962293	-7.55882	4.07e-14	8.6e-13
ENSG00000100647	SUSD6	protein_coding	1554.74	-1.01241	0.133945	-7.55842	4.08e-14	8.62e-13
ENSG00000127955	GNAI1	protein_coding	25.1114	1.99553	0.264105	7.55579	4.16e-14	8.79e-13
ENSG00000117280	RAB29	protein_coding	621.122	-0.670702	0.0887756	-7.55502	4.19e-14	8.83e-13
ENSG00000132334	PTPRE	protein_coding	1751.59	-0.945091	0.125193	-7.54909	4.38e-14	9.23e-13
ENSG00000291048	ENSG00000291048	lncRNA	178.27	-0.899763	0.119209	-7.54781	4.43e-14	9.31e-13
ENSG00000136842	TMOD1	protein_coding	1241	1.84532	0.244491	7.54761	4.43e-14	9.32e-13
ENSG00000229644	NAMPTP1	processed_pseudogene	3240.88	-1.57653	0.208934	-7.54556	4.5e-14	9.46e-13
ENSG00000114784	EIF1B	protein_coding	1518.05	1.24232	0.164718	7.54211	4.62e-14	9.7e-13
ENSG00000087086	FTL	protein_coding	82622.6	1.34702	0.178683	7.53861	4.75e-14	9.96e-13
ENSG00000175040	CHST2	protein_coding	825.051	1.18344	0.157075	7.53428	4.91e-14	1.03e-12
ENSG00000100505	TRIM9	protein_coding	29.936	-1.94688	0.258436	-7.53331	4.95e-14	1.04e-12
ENSG00000161681	SHANK1	protein_coding	10.1739	2.45392	0.325764	7.53281	4.97e-14	1.04e-12
ENSG00000114268	PFKFB4	protein_coding	987.892	-0.974542	0.129375	-7.53268	4.97e-14	1.04e-12
ENSG00000224950	ENSG00000224950	lncRNA	49.8174	-1.18636	0.157568	-7.52917	5.11e-14	1.07e-12
ENSG00000101447	FAM83D	protein_coding	25.0198	2.09401	0.278183	7.52747	5.17e-14	1.08e-12
ENSG00000231925	TAPBP	protein_coding	1696.55	-0.896682	0.119172	-7.52427	5.3e-14	1.11e-12
ENSG00000152990	ADGRA3	protein_coding	32.6431	1.86134	0.247454	7.52197	5.4e-14	1.12e-12
ENSG00000141506	PIK3R5	protein_coding	2404.35	-0.741394	0.0985728	-7.52128	5.42e-14	1.13e-12
ENSG00000180089	TMEM86B	protein_coding	277.686	1.94582	0.258783	7.51912	5.51e-14	1.15e-12
ENSG00000188021	UBQLN2	protein_coding	470.205	-0.758766	0.100931	-7.51764	5.58e-14	1.16e-12
ENSG00000146674	IGFBP3	protein_coding	28.7864	-2.05654	0.273569	-7.51745	5.59e-14	1.16e-12
ENSG00000184226	PCDH9	protein_coding	61.9696	2.25454	0.299911	7.51734	5.59e-14	1.16e-12
ENSG00000188822	CNR2	protein_coding	148.742	1.10302	0.146821	7.51273	5.79e-14	1.2e-12
ENSG00000087237	CETP	protein_coding	47.2892	-1.5513	0.206525	-7.51148	5.85e-14	1.21e-12
ENSG00000166167	BTRC	protein_coding	195.713	0.76636	0.10204	7.51039	5.9e-14	1.22e-12
ENSG00000196116	TDRD7	protein_coding	325.168	-0.792316	0.105515	-7.50901	5.96e-14	1.23e-12
ENSG00000232229	LINC00865	lncRNA	16.8479	1.89306	0.252191	7.50645	6.08e-14	1.26e-12
ENSG00000102699	PARP4	protein_coding	1338.91	-0.745542	0.099321	-7.50639	6.08e-14	1.26e-12
ENSG00000090097	PCBP4	protein_coding	58.1325	-1.62763	0.216888	-7.50446	6.17e-14	1.27e-12
ENSG00000172197	MBOAT1	protein_coding	349.689	-0.863008	0.115107	-7.49743	6.51e-14	1.34e-12
ENSG00000136694	IL36A	protein_coding	3.83148	4.04207	0.539134	7.49734	6.51e-14	1.34e-12
ENSG00000110080	ST3GAL4	protein_coding	469.74	-1.22992	0.164185	-7.49108	6.83e-14	1.41e-12
ENSG00000235576	LINC01871	lncRNA	31.3023	-2.13304	0.284812	-7.48928	6.93e-14	1.42e-12
ENSG00000290735	ENSG00000290735	lncRNA	20.0759	-2.21633	0.296057	-7.48618	7.09e-14	1.46e-12
ENSG00000162739	SLAMF6	protein_coding	537.095	-0.968644	0.129397	-7.48581	7.11e-14	1.46e-12
ENSG00000154165	GPR15	protein_coding	31.7798	-1.84566	0.246612	-7.48403	7.21e-14	1.48e-12
ENSG00000183496	MEX3B	protein_coding	14.6831	2.09982	0.280622	7.48272	7.28e-14	1.49e-12
ENSG00000211899	IGHM	IG_C_gene	4927.64	1.55505	0.207848	7.48168	7.34e-14	1.5e-12
ENSG00000004897	CDC27	protein_coding	573.564	0.948241	0.126773	7.47985	7.44e-14	1.52e-12
ENSG00000165879	FRAT1	protein_coding	1360.5	-0.859315	0.114907	-7.47835	7.53e-14	1.54e-12
ENSG00000162415	ZSWIM5	protein_coding	9.0146	-2.73377	0.365939	-7.47057	7.99e-14	1.63e-12
ENSG00000111666	CHPT1	protein_coding	2149.28	1.54042	0.206213	7.47007	8.02e-14	1.64e-12
ENSG00000116701	NCF2	protein_coding	10945.9	-0.920626	0.123333	-7.46454	8.36e-14	1.71e-12
ENSG00000103994	ZNF106	protein_coding	1423.83	-0.884465	0.118496	-7.4641	8.39e-14	1.71e-12
ENSG00000186792	HYAL3	protein_coding	80.5811	1.73724	0.232795	7.46251	8.49e-14	1.73e-12
ENSG00000232818	RPS2P32	processed_pseudogene	17.4846	2.08842	0.279914	7.46094	8.59e-14	1.75e-12
ENSG00000170540	ARL6IP1	protein_coding	1274.98	0.843516	0.113102	7.45804	8.78e-14	1.79e-12
ENSG00000171033	PKIA	protein_coding	109.055	1.34199	0.179952	7.45748	8.82e-14	1.79e-12
ENSG00000180992	MRPL14	protein_coding	167.484	0.957809	0.128448	7.45676	8.87e-14	1.8e-12
ENSG00000215475	SIAH3	protein_coding	8.4142	3.74004	0.501656	7.45539	8.96e-14	1.82e-12
ENSG00000128218	VPREB3	protein_coding	113.846	1.98013	0.265634	7.45433	9.03e-14	1.83e-12
ENSG00000166979	EVA1C	protein_coding	28.4336	-1.9589	0.262827	-7.4532	9.11e-14	1.85e-12
ENSG00000141858	SAMD1	protein_coding	217.097	0.963867	0.129327	7.45293	9.13e-14	1.85e-12
ENSG00000108771	DHX58	protein_coding	282.699	-1.03118	0.138451	-7.44794	9.48e-14	1.92e-12
ENSG00000235750	KIAA0040	protein_coding	1831.32	-0.756438	0.101578	-7.44686	9.56e-14	1.93e-12
ENSG00000128040	SPINK2	protein_coding	13.8815	2.40598	0.323112	7.44629	9.6e-14	1.94e-12
ENSG00000170891	CYTL1	protein_coding	8.64914	2.61872	0.351706	7.44575	9.64e-14	1.95e-12
ENSG00000156575	PRG3	protein_coding	39.8127	6.11185	0.821608	7.43888	1.02e-13	2.05e-12
ENSG00000104324	CPQ	protein_coding	681.616	-1.07759	0.144878	-7.43792	1.02e-13	2.06e-12
ENSG00000125735	TNFSF14	protein_coding	778.343	-0.983397	0.132267	-7.43493	1.05e-13	2.1e-12
ENSG00000261804	ENSG00000261804	lncRNA	32.5549	-1.94919	0.262343	-7.42992	1.09e-13	2.18e-12
ENSG00000247095	MIR210HG	lncRNA	12.0149	2.73955	0.368737	7.42954	1.09e-13	2.19e-12
ENSG00000134686	PHC2	protein_coding	3414.31	-1.06632	0.143545	-7.42845	1.1e-13	2.21e-12
ENSG00000130177	CDC16	protein_coding	578.311	0.814972	0.109734	7.42677	1.11e-13	2.23e-12
ENSG00000132475	H3-3B	protein_coding	9500.84	-0.753321	0.101463	-7.42461	1.13e-13	2.27e-12
ENSG00000170892	TSEN34	protein_coding	1074.46	-0.945199	0.127361	-7.42142	1.16e-13	2.32e-12
ENSG00000103313	MEFV	protein_coding	2108.04	-0.952185	0.128354	-7.41841	1.19e-13	2.37e-12
ENSG00000142089	IFITM3	protein_coding	7314	-1.59572	0.215129	-7.4175	1.19e-13	2.38e-12
ENSG00000115138	POMC	protein_coding	35.7302	2.09956	0.283247	7.4125	1.24e-13	2.47e-12
ENSG00000203780	FANK1	protein_coding	17.7894	2.32078	0.313145	7.41121	1.25e-13	2.5e-12
ENSG00000196914	ARHGEF12	protein_coding	1353.33	1.64429	0.221893	7.41026	1.26e-13	2.51e-12
ENSG00000271821	ENSG00000271821	lncRNA	32.9614	-1.83624	0.247845	-7.40882	1.27e-13	2.54e-12
ENSG00000289300	ENSG00000289300	lncRNA	6.32182	5.61571	0.758069	7.40791	1.28e-13	2.55e-12
ENSG00000126787	DLGAP5	protein_coding	39.6531	1.88397	0.254323	7.4078	1.28e-13	2.55e-12
ENSG00000232434	AJM1	protein_coding	62.2535	-1.98914	0.268632	-7.40471	1.31e-13	2.61e-12
ENSG00000172059	KLF11	protein_coding	119.32	-1.04471	0.141089	-7.40461	1.32e-13	2.61e-12
ENSG00000151893	CACUL1	protein_coding	741.885	-0.841588	0.113736	-7.39948	1.37e-13	2.71e-12
ENSG00000204516	MICB	protein_coding	230.248	-0.761009	0.102857	-7.39868	1.38e-13	2.73e-12
ENSG00000178935	ZNF552	protein_coding	143.858	-0.818325	0.110609	-7.39835	1.38e-13	2.73e-12
ENSG00000138311	ZNF365	protein_coding	5.62675	-4.61417	0.623791	-7.39698	1.39e-13	2.76e-12
ENSG00000236449	ENSG00000236449	lncRNA	59.7448	-1.37381	0.185798	-7.39409	1.42e-13	2.82e-12
ENSG00000160888	IER2	protein_coding	889.104	-0.88052	0.119099	-7.39316	1.43e-13	2.83e-12
ENSG00000146828	SLC12A9	protein_coding	2758.94	-0.907652	0.122785	-7.3922	1.44e-13	2.85e-12
ENSG00000197993	KEL	protein_coding	383.278	1.98948	0.269185	7.39074	1.46e-13	2.88e-12
ENSG00000138172	CALHM2	protein_coding	338.499	-1.04874	0.142012	-7.38489	1.53e-13	3.01e-12
ENSG00000102934	PLLP	protein_coding	37.164	1.02334	0.138664	7.37999	1.58e-13	3.12e-12
ENSG00000287261	HPS1-AS1	lncRNA	12.8234	1.95765	0.265281	7.37951	1.59e-13	3.13e-12
ENSG00000132825	PPP1R3D	protein_coding	383.58	-0.945081	0.128174	-7.37343	1.66e-13	3.27e-12
ENSG00000167851	CD300A	protein_coding	2289.3	-0.980191	0.132968	-7.3716	1.69e-13	3.31e-12
ENSG00000170379	TCAF2	protein_coding	83.4126	-0.948879	0.128736	-7.37072	1.7e-13	3.33e-12
ENSG00000147180	ZNF711	protein_coding	24.7237	2.04329	0.277265	7.36946	1.71e-13	3.36e-12
ENSG00000145386	CCNA2	protein_coding	46.6649	1.44591	0.196212	7.36913	1.72e-13	3.37e-12
ENSG00000154889	MPPE1	protein_coding	618.044	-0.881548	0.119678	-7.36598	1.76e-13	3.45e-12
ENSG00000086232	EIF2AK1	protein_coding	4858.22	1.34377	0.182504	7.36297	1.8e-13	3.52e-12
ENSG00000188906	LRRK2	protein_coding	4370.5	-1.46719	0.199315	-7.36115	1.82e-13	3.57e-12
ENSG00000108582	CPD	protein_coding	1441.15	-1.10312	0.149906	-7.35879	1.86e-13	3.62e-12
ENSG00000254995	STX16-NPEPL1	protein_coding	48.8216	-1.43233	0.19473	-7.3555	1.9e-13	3.71e-12
ENSG00000155363	MOV10	protein_coding	370.45	-1.04914	0.142668	-7.35375	1.93e-13	3.76e-12
ENSG00000132470	ITGB4	protein_coding	51.5986	-1.83638	0.249728	-7.3535	1.93e-13	3.76e-12
ENSG00000181751	MACIR	protein_coding	73.0851	1.05536	0.143549	7.35191	1.95e-13	3.8e-12
ENSG00000234912	SNHG20	lncRNA	81.6514	0.780612	0.106202	7.35022	1.98e-13	3.85e-12
ENSG00000289251	ENSG00000289251	lncRNA	60.736	-1.22269	0.16637	-7.34919	1.99e-13	3.88e-12
ENSG00000143653	SCCPDH	protein_coding	133.138	0.868594	0.118213	7.3477	2.02e-13	3.92e-12
ENSG00000258511	LINC02295	lncRNA	34.2333	1.50354	0.204637	7.34737	2.02e-13	3.92e-12
ENSG00000136250	AOAH	protein_coding	1966.08	-0.886179	0.120619	-7.3469	2.03e-13	3.93e-12
ENSG00000246100	LINC00900	lncRNA	5.43174	-4.34182	0.591023	-7.34628	2.04e-13	3.95e-12
ENSG00000172232	AZU1	protein_coding	502.47	3.55593	0.484082	7.34572	2.05e-13	3.96e-12
ENSG00000166582	CENPV	protein_coding	62.1637	0.894351	0.121785	7.34371	2.08e-13	4.02e-12
ENSG00000101003	GINS1	protein_coding	23.7999	1.48337	0.202163	7.33753	2.18e-13	4.21e-12
ENSG00000087589	CASS4	protein_coding	408.821	-1.08589	0.148042	-7.33497	2.22e-13	4.28e-12
ENSG00000233392	UICLM	lncRNA	19.2509	-2.68034	0.365508	-7.3332	2.25e-13	4.34e-12
ENSG00000107736	CDH23	protein_coding	345.694	-0.960006	0.130973	-7.32979	2.31e-13	4.45e-12
ENSG00000152969	JAKMIP1	protein_coding	7.24244	-4.39729	0.600098	-7.32762	2.34e-13	4.52e-12
ENSG00000187775	DNAH17	protein_coding	408.462	-1.22533	0.167285	-7.32482	2.39e-13	4.61e-12
ENSG00000220008	LINGO3	protein_coding	224.935	-0.910456	0.124353	-7.32153	2.45e-13	4.72e-12
ENSG00000145868	FBXO38	protein_coding	614.126	-0.672633	0.0918711	-7.32149	2.45e-13	4.72e-12
ENSG00000253824	ENSG00000253824	lncRNA	3.77172	5.50838	0.75248	7.32031	2.47e-13	4.75e-12
ENSG00000167037	SGSM1	protein_coding	14.1253	-3.04477	0.416062	-7.31806	2.52e-13	4.83e-12
ENSG00000272908	ENSG00000272908	lncRNA	63.7467	-1.4003	0.191374	-7.31712	2.53e-13	4.86e-12
ENSG00000035664	DAPK2	protein_coding	516.554	-1.0594	0.14479	-7.31682	2.54e-13	4.87e-12
ENSG00000251322	SHANK3	protein_coding	9.89565	2.91536	0.39848	7.3162	2.55e-13	4.89e-12
ENSG00000156136	DCK	protein_coding	872.623	1.46097	0.199705	7.31568	2.56e-13	4.9e-12
ENSG00000090889	KIF4A	protein_coding	25.2423	1.78231	0.243638	7.31538	2.57e-13	4.91e-12
ENSG00000119950	MXI1	protein_coding	6579.13	1.69641	0.23192	7.31462	2.58e-13	4.93e-12
ENSG00000140678	ITGAX	protein_coding	6814.69	-1.06092	0.145052	-7.31407	2.59e-13	4.95e-12
ENSG00000165821	SALL2	protein_coding	27.7849	1.3411	0.183396	7.31257	2.62e-13	5e-12
ENSG00000197353	LYPD2	protein_coding	19.6392	-5.31604	0.726975	-7.31255	2.62e-13	5e-12
ENSG00000188389	PDCD1	protein_coding	42.2048	-1.92638	0.263623	-7.30734	2.72e-13	5.19e-12
ENSG00000258128	MKRN9P	transcribed_processed_pseudogene	73.2016	1.76781	0.241944	7.30669	2.74e-13	5.22e-12
ENSG00000139174	PRICKLE1	protein_coding	36.5027	1.20849	0.165412	7.30594	2.75e-13	5.24e-12
ENSG00000214872	SMTNL1	protein_coding	30.0865	-2.53264	0.346685	-7.30529	2.77e-13	5.26e-12
ENSG00000102048	ASB9	protein_coding	5.9301	3.22677	0.441709	7.30519	2.77e-13	5.26e-12
ENSG00000120913	PDLIM2	protein_coding	651.148	-0.666827	0.0912868	-7.30475	2.78e-13	5.28e-12
ENSG00000187862	TTC24	protein_coding	70.5496	1.5472	0.211827	7.30406	2.79e-13	5.3e-12
ENSG00000166855	CLPX	protein_coding	602.717	0.786664	0.107746	7.30113	2.85e-13	5.41e-12
ENSG00000020577	SAMD4A	protein_coding	63.1104	-1.52553	0.209014	-7.2987	2.91e-13	5.51e-12
ENSG00000187753	C9orf153	protein_coding	7.23381	3.53234	0.484215	7.295	2.99e-13	5.66e-12
ENSG00000075234	TTC38	protein_coding	320.735	-1.47054	0.201789	-7.28754	3.16e-13	5.97e-12
ENSG00000124102	PI3	protein_coding	456.101	-2.19889	0.301734	-7.2875	3.16e-13	5.97e-12
ENSG00000247934	ENSG00000247934	lncRNA	27.9845	1.82534	0.250516	7.28632	3.19e-13	6.01e-12
ENSG00000186185	KIF18B	protein_coding	22.9908	1.91179	0.262413	7.28544	3.21e-13	6.05e-12
ENSG00000265666	RARA-AS1	lncRNA	122.245	-1.06408	0.146079	-7.28424	3.23e-13	6.1e-12
ENSG00000198176	TFDP1	protein_coding	1997.29	1.46796	0.20164	7.28012	3.34e-13	6.28e-12
ENSG00000175130	MARCKSL1	protein_coding	755.698	0.902609	0.124021	7.27789	3.39e-13	6.38e-12
ENSG00000116668	SWT1	protein_coding	191.471	1.19009	0.163616	7.27366	3.5e-13	6.58e-12
ENSG00000185885	IFITM1	protein_coding	5126	-1.04418	0.143621	-7.27037	3.59e-13	6.73e-12
ENSG00000130775	THEMIS2	protein_coding	4036.94	-0.894854	0.123135	-7.26725	3.67e-13	6.88e-12
ENSG00000146409	SLC18B1	protein_coding	238.157	0.860586	0.118439	7.26606	3.7e-13	6.94e-12
ENSG00000187601	MAGEH1	protein_coding	94.4304	0.955626	0.131598	7.26172	3.82e-13	7.16e-12
ENSG00000144468	RHBDD1	protein_coding	253.051	0.630385	0.0868193	7.26089	3.85e-13	7.2e-12
ENSG00000245552	LNCRNA-IUR	lncRNA	369.983	1.5299	0.210753	7.25919	3.89e-13	7.28e-12
ENSG00000169575	VPREB1	protein_coding	4.63784	5.35896	0.738294	7.25857	3.91e-13	7.31e-12
ENSG00000082014	SMARCD3	protein_coding	200.329	-1.06894	0.147288	-7.25751	3.94e-13	7.36e-12
ENSG00000147400	CETN2	protein_coding	313.301	1.20906	0.166608	7.25687	3.96e-13	7.39e-12
ENSG00000135924	DNAJB2	protein_coding	3850.08	1.50004	0.206735	7.25583	3.99e-13	7.44e-12
ENSG00000196712	NF1	protein_coding	243.09	-0.797284	0.109885	-7.25565	4e-13	7.45e-12
ENSG00000148090	AUH	protein_coding	130.601	1.07808	0.148657	7.25214	4.1e-13	7.63e-12
ENSG00000073060	SCARB1	protein_coding	145.371	1.01065	0.139441	7.24785	4.23e-13	7.87e-12
ENSG00000111602	TIMELESS	protein_coding	116.612	0.877741	0.121134	7.24602	4.29e-13	7.98e-12
ENSG00000123700	KCNJ2	protein_coding	1237.21	-1.71722	0.23704	-7.24444	4.34e-13	8.06e-12
ENSG00000012983	MAP4K5	protein_coding	352.324	1.14847	0.158533	7.24433	4.35e-13	8.06e-12
ENSG00000181481	RNF135	protein_coding	379.443	-0.767655	0.105969	-7.24418	4.35e-13	8.07e-12
ENSG00000198417	MT1F	protein_coding	27.9393	-1.54968	0.213978	-7.24224	4.41e-13	8.18e-12
ENSG00000290242	ENSG00000290242	lncRNA	19.3189	4.45802	0.615653	7.24113	4.45e-13	8.24e-12
ENSG00000112234	FBXL4	protein_coding	268.339	0.889813	0.122896	7.24039	4.47e-13	8.28e-12
ENSG00000115295	CLIP4	protein_coding	180.407	-1.17654	0.162542	-7.23835	4.54e-13	8.4e-12
ENSG00000198785	GRIN3A	protein_coding	22.0386	-1.57599	0.217738	-7.23801	4.55e-13	8.41e-12
ENSG00000137414	FAM8A1	protein_coding	1140.89	-1.4651	0.202444	-7.23705	4.59e-13	8.47e-12
ENSG00000232810	TNF	protein_coding	63.1784	-0.837084	0.115815	-7.22776	4.91e-13	9.06e-12
ENSG00000152689	RASGRP3	protein_coding	99.4269	0.966831	0.133769	7.22761	4.92e-13	9.06e-12
ENSG00000270164	LINC01480	lncRNA	25.1234	1.4106	0.195175	7.22736	4.92e-13	9.07e-12
ENSG00000165678	GHITM	protein_coding	2847.69	0.730111	0.10103	7.22666	4.95e-13	9.11e-12
ENSG00000140030	GPR65	protein_coding	530.356	-1.01295	0.140179	-7.22613	4.97e-13	9.14e-12
ENSG00000170522	ELOVL6	protein_coding	174.401	1.70978	0.236898	7.21737	5.3e-13	9.74e-12
ENSG00000112763	BTN2A1	protein_coding	860.83	-0.855179	0.118493	-7.21715	5.31e-13	9.75e-12
ENSG00000198792	TMEM184B	protein_coding	596.896	-0.883729	0.122479	-7.21538	5.38e-13	9.87e-12
ENSG00000170364	SETMAR	protein_coding	56.1316	0.880421	0.122039	7.21424	5.42e-13	9.95e-12
ENSG00000162373	BEND5	protein_coding	27.3248	1.59694	0.221432	7.21185	5.52e-13	1.01e-11
ENSG00000289137	ENSG00000289137	lncRNA	22.5361	-2.23585	0.310061	-7.21101	5.55e-13	1.02e-11
ENSG00000131389	SLC6A6	protein_coding	3932.59	-1.25465	0.17401	-7.21024	5.59e-13	1.02e-11
ENSG00000213866	YBX1P10	processed_pseudogene	451.89	1.25294	0.173831	7.20781	5.69e-13	1.04e-11
ENSG00000131016	AKAP12	protein_coding	25.6214	2.33207	0.323579	7.20711	5.72e-13	1.04e-11
ENSG00000163082	SGPP2	protein_coding	21.8658	-1.44875	0.2011	-7.20415	5.84e-13	1.07e-11
ENSG00000277301	ENSG00000277301	lncRNA	16.688	1.68473	0.233891	7.20306	5.89e-13	1.07e-11
ENSG00000158106	RHPN1	protein_coding	132.264	1.52253	0.2116	7.19532	6.23e-13	1.14e-11
ENSG00000073150	PANX2	protein_coding	209.812	-1.50389	0.209043	-7.19415	6.29e-13	1.15e-11
ENSG00000074319	TSG101	protein_coding	997.897	0.734233	0.102089	7.19212	6.38e-13	1.16e-11
ENSG00000182512	GLRX5	protein_coding	4821.23	1.72568	0.239963	7.19145	6.41e-13	1.17e-11
ENSG00000165283	STOML2	protein_coding	499.109	1.00008	0.139157	7.1867	6.64e-13	1.21e-11
ENSG00000103202	NME4	protein_coding	464.599	1.49822	0.208499	7.18574	6.68e-13	1.21e-11
ENSG00000055130	CUL1	protein_coding	515.331	-0.592204	0.0824293	-7.18438	6.75e-13	1.23e-11
ENSG00000065882	TBC1D1	protein_coding	1089.78	-0.842755	0.117325	-7.18306	6.82e-13	1.24e-11
ENSG00000280832	GSEC	lncRNA	142.633	-1.24983	0.174077	-7.17972	6.99e-13	1.27e-11
ENSG00000144648	ACKR2	protein_coding	19.7312	2.53446	0.353041	7.17892	7.03e-13	1.27e-11
ENSG00000205045	SLFN12L	protein_coding	498.42	-1.69833	0.236587	-7.17846	7.05e-13	1.28e-11
ENSG00000197872	CYRIA	protein_coding	946.066	-0.670968	0.0935472	-7.1725	7.36e-13	1.33e-11
ENSG00000173207	CKS1B	protein_coding	71.5779	0.930953	0.129903	7.16652	7.69e-13	1.39e-11
ENSG00000035862	TIMP2	protein_coding	1671.19	-0.837744	0.116923	-7.16492	7.78e-13	1.41e-11
ENSG00000083750	RRAGB	protein_coding	116.82	1.12015	0.156354	7.16416	7.83e-13	1.41e-11
ENSG00000173581	CCDC106	protein_coding	52.9243	1.30644	0.182452	7.16045	8.04e-13	1.45e-11
ENSG00000129116	PALLD	protein_coding	76.5962	-1.11794	0.156136	-7.16004	8.07e-13	1.45e-11
ENSG00000163564	PYHIN1	protein_coding	292.93	-1.15725	0.161674	-7.15793	8.19e-13	1.48e-11
ENSG00000174132	FAM174A	protein_coding	105.432	-1.05909	0.147972	-7.15739	8.22e-13	1.48e-11
ENSG00000259129	LINC00648	lncRNA	3.22778	5.6559	0.790394	7.1558	8.32e-13	1.5e-11
ENSG00000149516	MS4A3	protein_coding	527.804	3.29747	0.460874	7.15483	8.38e-13	1.51e-11
ENSG00000134698	AGO4	protein_coding	1764.78	-0.990227	0.138408	-7.15439	8.4e-13	1.51e-11
ENSG00000282572	FAM157D	lncRNA	165.712	-1.80902	0.252884	-7.15356	8.46e-13	1.52e-11
ENSG00000224831	TMEM183BP	processed_pseudogene	76.4411	1.04239	0.145734	7.1527	8.51e-13	1.53e-11
ENSG00000289946	ENSG00000289946	lncRNA	6.20477	3.79949	0.531597	7.14731	8.85e-13	1.59e-11
ENSG00000198937	CCDC167	protein_coding	87.7542	0.980383	0.1372	7.14567	8.96e-13	1.6e-11
ENSG00000180543	TSPYL5	protein_coding	37.7668	1.44057	0.201605	7.14551	8.97e-13	1.6e-11
ENSG00000100003	SEC14L2	protein_coding	21.1528	1.56106	0.218534	7.14331	9.11e-13	1.63e-11
ENSG00000157600	TMEM164	protein_coding	1530.21	-0.978902	0.137088	-7.14069	9.29e-13	1.66e-11
ENSG00000162490	DRAXIN	protein_coding	32.5677	-2.15624	0.302029	-7.13916	9.39e-13	1.68e-11
ENSG00000141458	NPC1	protein_coding	237.135	-0.932461	0.130755	-7.13134	9.94e-13	1.77e-11
ENSG00000149547	EI24	protein_coding	272.613	0.588254	0.082494	7.13087	9.97e-13	1.78e-11
ENSG00000132640	BTBD3	protein_coding	48.9755	1.04903	0.147129	7.13001	1e-12	1.79e-11
ENSG00000197256	KANK2	protein_coding	376.182	1.86824	0.262042	7.12952	1.01e-12	1.79e-11
ENSG00000262001	DLGAP1-AS2	lncRNA	32.0298	-1.46691	0.20579	-7.1282	1.02e-12	1.81e-11
ENSG00000137642	SORL1	protein_coding	9997.57	-1.06114	0.148941	-7.12461	1.04e-12	1.85e-11
ENSG00000159128	IFNGR2	protein_coding	1996.8	-0.68943	0.096769	-7.12449	1.04e-12	1.85e-11
ENSG00000140264	SERF2	protein_coding	5090.41	1.33216	0.187157	7.11787	1.1e-12	1.94e-11
ENSG00000171208	NETO2	protein_coding	45.9811	-1.28288	0.18035	-7.11331	1.13e-12	2.01e-11
ENSG00000285103	ENSG00000285103	lncRNA	78.4005	-1.6346	0.229823	-7.11244	1.14e-12	2.02e-11
ENSG00000011422	PLAUR	protein_coding	877.521	-0.870042	0.122342	-7.11158	1.15e-12	2.03e-11
ENSG00000259675	ENSG00000259675	lncRNA	2.64124	5.18566	0.729263	7.11082	1.15e-12	2.04e-11
ENSG00000019169	MARCO	protein_coding	121.042	-1.93648	0.272427	-7.10824	1.18e-12	2.08e-11
ENSG00000159733	ZFYVE28	protein_coding	87.4875	-1.59382	0.224237	-7.10774	1.18e-12	2.08e-11
ENSG00000272734	ADIRF-AS1	lncRNA	10.4587	-2.46781	0.347319	-7.10529	1.2e-12	2.12e-11
ENSG00000183607	GKN2	protein_coding	4.6989	5.0317	0.70819	7.10501	1.2e-12	2.12e-11
ENSG00000107099	DOCK8	protein_coding	3203.08	-0.703615	0.0990511	-7.10356	1.22e-12	2.14e-11
ENSG00000188820	CALHM6	protein_coding	132.677	-1.92946	0.271637	-7.10308	1.22e-12	2.15e-11
ENSG00000186074	CD300LF	protein_coding	805.998	-0.818408	0.115225	-7.10271	1.22e-12	2.15e-11
ENSG00000168807	SNTB2	protein_coding	233.313	-1.07384	0.151245	-7.10002	1.25e-12	2.19e-11
ENSG00000232912	RERE-AS1	lncRNA	48.8456	-1.14262	0.160934	-7.09994	1.25e-12	2.19e-11
ENSG00000235288	ENSG00000235288	lncRNA	5.4855	2.87731	0.405295	7.0993	1.25e-12	2.2e-11
ENSG00000167972	ABCA3	protein_coding	35.1594	-1.98899	0.280284	-7.09636	1.28e-12	2.25e-11
ENSG00000122026	RPL21	protein_coding	7081.67	1.28239	0.180738	7.0953	1.29e-12	2.26e-11
ENSG00000080854	IGSF9B	protein_coding	154.619	1.12512	0.158676	7.09067	1.33e-12	2.34e-11
ENSG00000196189	SEMA4A	protein_coding	1158.52	-1.06364	0.150016	-7.09019	1.34e-12	2.35e-11
ENSG00000134954	ETS1	protein_coding	5783.52	0.750572	0.105883	7.0887	1.35e-12	2.37e-11
ENSG00000164821	DEFA4	protein_coding	1075.05	3.4201	0.482646	7.08613	1.38e-12	2.41e-11
ENSG00000287315	ENSG00000287315	lncRNA	17.1052	1.457	0.205805	7.07952	1.45e-12	2.53e-11
ENSG00000112742	TTK	protein_coding	16.6137	1.57695	0.222812	7.07749	1.47e-12	2.56e-11
ENSG00000246526	LINC02481	lncRNA	49.766	-1.60013	0.226107	-7.07686	1.47e-12	2.57e-11
ENSG00000226004	LINC02528	lncRNA	7.50905	-3.49521	0.493972	-7.07573	1.49e-12	2.59e-11
ENSG00000132613	MTSS2	protein_coding	16.6185	2.20417	0.311532	7.07528	1.49e-12	2.6e-11
ENSG00000166825	ANPEP	protein_coding	3476.83	-1.27202	0.179824	-7.07368	1.51e-12	2.63e-11
ENSG00000183878	UTY	protein_coding	78.709	10.0978	1.42773	7.07263	1.52e-12	2.65e-11
ENSG00000145741	BTF3	protein_coding	5452.85	0.982682	0.138945	7.07246	1.52e-12	2.65e-11
ENSG00000168421	RHOH	protein_coding	578.89	0.68734	0.0971942	7.07183	1.53e-12	2.66e-11
ENSG00000180891	CUEDC1	protein_coding	273.249	-0.864091	0.12221	-7.07056	1.54e-12	2.68e-11
ENSG00000188641	DPYD	protein_coding	1060.9	-0.650964	0.0920932	-7.06854	1.57e-12	2.72e-11
ENSG00000168993	CPLX1	protein_coding	5.7102	2.9873	0.422641	7.06818	1.57e-12	2.72e-11
ENSG00000224041	IGKV3D-15	IG_V_gene	8.40787	-4.58288	0.648422	-7.06774	1.57e-12	2.73e-11
ENSG00000180815	MAP3K15	protein_coding	14.7512	2.10849	0.298542	7.06263	1.63e-12	2.83e-11
ENSG00000286181	ENSG00000286181	lncRNA	4.92576	2.84535	0.402991	7.06058	1.66e-12	2.87e-11
ENSG00000211821	TRDV2	TR_V_gene	69.9705	-3.17177	0.449245	-7.06023	1.66e-12	2.88e-11
ENSG00000137288	UQCC2	protein_coding	118.173	0.717427	0.101616	7.06014	1.66e-12	2.88e-11
ENSG00000139178	C1RL	protein_coding	1099.32	-0.732	0.103724	-7.05717	1.7e-12	2.94e-11
ENSG00000065328	MCM10	protein_coding	14.1062	1.81018	0.256516	7.0568	1.7e-12	2.94e-11
ENSG00000256574	OR13A1	protein_coding	8.22028	2.79137	0.395629	7.05553	1.72e-12	2.97e-11
ENSG00000154153	RETREG1	protein_coding	184.2	1.26999	0.180044	7.05377	1.74e-12	3e-11
ENSG00000290541	CYP4F29P	lncRNA	26.7311	-5.63381	0.799173	-7.04955	1.79e-12	3.09e-11
ENSG00000170915	PAQR8	protein_coding	359.294	0.622245	0.0882768	7.0488	1.8e-12	3.11e-11
ENSG00000011426	ANLN	protein_coding	39.0227	2.0363	0.289054	7.04472	1.86e-12	3.2e-11
ENSG00000197405	C5AR1	protein_coding	4879.05	-0.946896	0.134417	-7.04446	1.86e-12	3.2e-11
ENSG00000213205	STRADBP1	processed_pseudogene	138.802	1.9473	0.276435	7.04434	1.86e-12	3.2e-11
ENSG00000145708	CRHBP	protein_coding	10.9057	2.14838	0.30501	7.04364	1.87e-12	3.22e-11
ENSG00000115758	ODC1	protein_coding	1448.1	1.22606	0.174148	7.04036	1.92e-12	3.29e-11
ENSG00000236975	LINC02814	lncRNA	7.83186	4.75215	0.6751	7.03918	1.93e-12	3.32e-11
ENSG00000229484	LINC02766	lncRNA	5.50053	2.40733	0.342117	7.03657	1.97e-12	3.38e-11
ENSG00000168209	DDIT4	protein_coding	383.337	-1.2061	0.171411	-7.03633	1.97e-12	3.38e-11
ENSG00000177455	CD19	protein_coding	174.571	1.36789	0.194436	7.0352	1.99e-12	3.41e-11
ENSG00000028137	TNFRSF1B	protein_coding	7574.66	-0.94583	0.134478	-7.03335	2.02e-12	3.45e-11
ENSG00000151474	FRMD4A	protein_coding	208.17	1.29526	0.184182	7.03249	2.03e-12	3.47e-11
ENSG00000166428	PLD4	protein_coding	287.247	1.53316	0.21808	7.03028	2.06e-12	3.52e-11
ENSG00000135048	CEMIP2	protein_coding	851.641	-0.784027	0.111588	-7.02609	2.12e-12	3.62e-11
ENSG00000159784	FAM131B	protein_coding	13.4399	-1.98302	0.282239	-7.02604	2.12e-12	3.62e-11
ENSG00000101350	KIF3B	protein_coding	224.643	-0.604559	0.0860457	-7.02603	2.12e-12	3.62e-11
ENSG00000157734	SNX22	protein_coding	151.911	1.36819	0.194755	7.02519	2.14e-12	3.64e-11
ENSG00000270426	ENSG00000270426	lncRNA	18.2169	-1.54789	0.22038	-7.02376	2.16e-12	3.68e-11
ENSG00000260528	FAM157C	lncRNA	540.172	-1.75745	0.250259	-7.02253	2.18e-12	3.71e-11
ENSG00000181585	TMIE	protein_coding	11.9112	1.9486	0.277605	7.01933	2.23e-12	3.79e-11
ENSG00000178921	PFAS	protein_coding	135.099	0.968014	0.137953	7.01699	2.27e-12	3.85e-11
ENSG00000167208	SNX20	protein_coding	1211.03	-0.622784	0.0887702	-7.01569	2.29e-12	3.88e-11
ENSG00000214826	DDX12P	unprocessed_pseudogene	36.6814	1.06301	0.151543	7.01459	2.31e-12	3.91e-11
ENSG00000084112	SSH1	protein_coding	562.027	-0.806414	0.11499	-7.01289	2.33e-12	3.96e-11
ENSG00000265612	MIR4539	miRNA	48.1124	1.65474	0.235961	7.01275	2.34e-12	3.96e-11
ENSG00000137177	KIF13A	protein_coding	519.68	-0.904509	0.128997	-7.01186	2.35e-12	3.98e-11
ENSG00000116514	RNF19B	protein_coding	1219.48	-0.925284	0.132036	-7.00783	2.42e-12	4.1e-11
ENSG00000153207	AHCTF1	protein_coding	769.511	-0.942481	0.134559	-7.00423	2.48e-12	4.2e-11
ENSG00000135862	LAMC1	protein_coding	61.6681	1.56282	0.223132	7.00399	2.49e-12	4.2e-11
ENSG00000180871	CXCR2	protein_coding	12799.5	-1.17652	0.168009	-7.00271	2.51e-12	4.24e-11
ENSG00000141497	ZMYND15	protein_coding	36.471	-1.687	0.240988	-7.00035	2.55e-12	4.31e-11
ENSG00000181274	FRAT2	protein_coding	3715.69	-0.975705	0.139402	-6.99919	2.57e-12	4.34e-11
ENSG00000135636	DYSF	protein_coding	4384.13	-1.17944	0.168539	-6.99801	2.6e-12	4.38e-11
ENSG00000125148	MT2A	protein_coding	290.523	-1.59378	0.227756	-6.99774	2.6e-12	4.38e-11
ENSG00000169249	ZRSR2	protein_coding	360.464	-0.691552	0.0989022	-6.99228	2.7e-12	4.55e-11
ENSG00000224861	YBX1P1	processed_pseudogene	397.248	1.31227	0.187707	6.99105	2.73e-12	4.59e-11
ENSG00000250366	TUNAR	protein_coding	4.85133	3.95751	0.566087	6.99099	2.73e-12	4.59e-11
ENSG00000185483	ROR1	protein_coding	2.99206	4.57448	0.654646	6.98771	2.79e-12	4.69e-11
ENSG00000111266	DUSP16	protein_coding	257.723	-0.73504	0.10519	-6.98771	2.79e-12	4.69e-11
ENSG00000254338	MAFA-AS1	lncRNA	2.57969	4.87389	0.697734	6.98532	2.84e-12	4.77e-11
ENSG00000141540	TTYH2	protein_coding	196.429	-0.804139	0.115121	-6.98514	2.85e-12	4.77e-11
ENSG00000179528	LBX2	protein_coding	9.12036	-2.41526	0.345838	-6.98377	2.87e-12	4.81e-11
ENSG00000184602	SNN	protein_coding	2118.79	-0.768989	0.110114	-6.98358	2.88e-12	4.81e-11
ENSG00000163600	ICOS	protein_coding	156.035	1.08308	0.155091	6.98354	2.88e-12	4.81e-11
ENSG00000174600	CMKLR1	protein_coding	211.188	-1.45128	0.207841	-6.98265	2.9e-12	4.84e-11
ENSG00000139508	SLC46A3	protein_coding	278.039	-0.647216	0.0926997	-6.98185	2.91e-12	4.86e-11
ENSG00000169224	GCSAML	protein_coding	17.147	2.09011	0.299444	6.97997	2.95e-12	4.93e-11
ENSG00000165030	NFIL3	protein_coding	678.646	-1.02953	0.147503	-6.97974	2.96e-12	4.93e-11
ENSG00000101596	SMCHD1	protein_coding	4019.37	-1.39744	0.200227	-6.97927	2.97e-12	4.94e-11
ENSG00000141526	SLC16A3	protein_coding	3318.73	-1.04262	0.149427	-6.97741	3.01e-12	5.01e-11
ENSG00000291033	TXLNGY	lncRNA	76.1953	8.65886	1.24161	6.97389	3.08e-12	5.13e-11
ENSG00000089639	GMIP	protein_coding	2683.4	-0.800047	0.114721	-6.97384	3.08e-12	5.13e-11
ENSG00000171236	LRG1	protein_coding	2197.46	-1.26504	0.181403	-6.97363	3.09e-12	5.13e-11
ENSG00000167106	FAM102A	protein_coding	1344.44	0.994148	0.142655	6.96889	3.19e-12	5.31e-11
ENSG00000145012	LPP	protein_coding	472.559	-0.951576	0.136623	-6.965	3.28e-12	5.45e-11
ENSG00000005893	LAMP2	protein_coding	2904.13	-0.886957	0.127465	-6.95842	3.44e-12	5.7e-11
ENSG00000183010	PYCR1	protein_coding	17.7351	2.0595	0.296067	6.9562	3.5e-12	5.79e-11
ENSG00000106868	SUSD1	protein_coding	313.62	-0.73807	0.106123	-6.95484	3.53e-12	5.84e-11
ENSG00000088305	DNMT3B	protein_coding	15.2636	2.03924	0.293246	6.95403	3.55e-12	5.87e-11
ENSG00000142634	EFHD2	protein_coding	8403.69	-0.869645	0.125064	-6.95361	3.56e-12	5.89e-11
ENSG00000111261	MANSC1	protein_coding	521.701	-1.07131	0.154069	-6.95346	3.56e-12	5.89e-11
ENSG00000234745	HLA-B	protein_coding	39281.1	-1.02385	0.147249	-6.95317	3.57e-12	5.9e-11
ENSG00000124440	HIF3A	protein_coding	5.84911	5.3317	0.766807	6.95313	3.57e-12	5.9e-11
ENSG00000131171	SH3BGRL	protein_coding	3112.46	0.826737	0.118949	6.95034	3.64e-12	6.01e-11
ENSG00000183734	ASCL2	protein_coding	90.1404	-1.67756	0.241382	-6.94981	3.66e-12	6.03e-11
ENSG00000106780	MEGF9	protein_coding	3447.02	-1.12834	0.162404	-6.94772	3.71e-12	6.11e-11
ENSG00000147526	TACC1	protein_coding	1243.97	-0.839586	0.120866	-6.9464	3.75e-12	6.17e-11
ENSG00000185630	PBX1	protein_coding	424.543	1.75547	0.252738	6.94583	3.76e-12	6.19e-11
ENSG00000289485	ENSG00000289485	lncRNA	11.6718	-3.38972	0.488043	-6.94552	3.77e-12	6.2e-11
ENSG00000170542	SERPINB9	protein_coding	798.329	-0.717882	0.103366	-6.94503	3.78e-12	6.22e-11
ENSG00000041880	PARP3	protein_coding	65.3129	-1.2257	0.17653	-6.94328	3.83e-12	6.29e-11
ENSG00000147174	GCNA	protein_coding	57.172	1.12491	0.16202	6.94302	3.84e-12	6.3e-11
ENSG00000260467	ENSG00000260467	lncRNA	56.0902	-1.7029	0.245292	-6.94233	3.86e-12	6.32e-11
ENSG00000121413	ZSCAN18	protein_coding	121.73	0.842742	0.121443	6.93937	3.94e-12	6.45e-11
ENSG00000093009	CDC45	protein_coding	19.2421	1.53455	0.221176	6.93814	3.97e-12	6.51e-11
ENSG00000137509	PRCP	protein_coding	1363.81	-0.625194	0.0901287	-6.93668	4.01e-12	6.57e-11
ENSG00000138160	KIF11	protein_coding	72.8356	1.23473	0.178019	6.93596	4.03e-12	6.6e-11
ENSG00000261884	ENSG00000261884	protein_coding	93.6759	-0.981204	0.141496	-6.93448	4.08e-12	6.66e-11
ENSG00000185022	MAFF	protein_coding	78.0119	-0.987936	0.142489	-6.93344	4.11e-12	6.71e-11
ENSG00000167207	NOD2	protein_coding	829.31	-1.18052	0.170297	-6.93213	4.15e-12	6.77e-11
ENSG00000168785	TSPAN5	protein_coding	2632.57	1.68956	0.243847	6.92875	4.25e-12	6.93e-11
ENSG00000158195	WASF2	protein_coding	7273.65	0.996985	0.143975	6.9247	4.37e-12	7.12e-11
ENSG00000089012	SIRPG	protein_coding	284.198	1.09797	0.158591	6.92326	4.41e-12	7.19e-11
ENSG00000279320	ENSG00000279320	TEC	51.0756	-1.4141	0.204323	-6.92089	4.49e-12	7.3e-11
ENSG00000183307	TMEM121B	protein_coding	214.985	-1.43825	0.207876	-6.91882	4.55e-12	7.41e-11
ENSG00000101916	TLR8	protein_coding	1601.58	-1.10334	0.159488	-6.91803	4.58e-12	7.44e-11
ENSG00000235532	LINC00402	lncRNA	19.9697	-1.87664	0.27128	-6.91772	4.59e-12	7.45e-11
ENSG00000154783	FGD5	protein_coding	6.44575	2.87709	0.415955	6.91683	4.62e-12	7.5e-11
ENSG00000267074	ENSG00000267074	lncRNA	59.2818	-1.58511	0.229238	-6.91469	4.69e-12	7.61e-11
ENSG00000103175	WFDC1	protein_coding	6.09416	3.94055	0.56989	6.91458	4.69e-12	7.61e-11
ENSG00000162545	CAMK2N1	protein_coding	10.0024	-2.49675	0.361237	-6.91165	4.79e-12	7.76e-11
ENSG00000148773	MKI67	protein_coding	153.206	1.47999	0.214144	6.9112	4.81e-12	7.78e-11
ENSG00000185361	TNFAIP8L1	protein_coding	181.544	0.830479	0.120184	6.91005	4.84e-12	7.83e-11
ENSG00000188153	COL4A5	protein_coding	5.67479	3.27872	0.474631	6.90794	4.92e-12	7.95e-11
ENSG00000167393	PPP2R3B	protein_coding	177.322	0.967605	0.140076	6.90771	4.93e-12	7.95e-11
ENSG00000160588	MPZL3	protein_coding	1124.62	-0.957007	0.138544	-6.90762	4.93e-12	7.95e-11
ENSG00000181220	ZNF746	protein_coding	782.542	-0.71887	0.10408	-6.90689	4.95e-12	7.99e-11
ENSG00000124172	ATP5F1E	protein_coding	5011.73	1.22533	0.177441	6.90555	5e-12	8.06e-11
ENSG00000166405	RIC3	protein_coding	44.3154	-1.48313	0.214799	-6.90471	5.03e-12	8.1e-11
ENSG00000003436	TFPI	protein_coding	20.8335	1.85346	0.268463	6.90396	5.06e-12	8.14e-11
ENSG00000100266	PACSIN2	protein_coding	2051.15	-0.689573	0.0998871	-6.90353	5.07e-12	8.16e-11
ENSG00000145220	LYAR	protein_coding	226.007	-0.717162	0.103914	-6.90149	5.15e-12	8.27e-11
ENSG00000103196	CRISPLD2	protein_coding	865.003	-1.26532	0.183384	-6.89985	5.21e-12	8.37e-11
ENSG00000079277	MKNK1	protein_coding	1071.09	-0.898322	0.130224	-6.8983	5.26e-12	8.45e-11
ENSG00000143842	SOX13	protein_coding	37.2736	-1.65959	0.240608	-6.89748	5.29e-12	8.49e-11
ENSG00000197555	SIPA1L1	protein_coding	785.665	-0.92126	0.133622	-6.89452	5.4e-12	8.66e-11
ENSG00000163820	FYCO1	protein_coding	243.015	-0.732964	0.106327	-6.89347	5.44e-12	8.72e-11
ENSG00000189369	GSPT2	protein_coding	85.5553	0.705072	0.102294	6.89258	5.48e-12	8.77e-11
ENSG00000105369	CD79A	protein_coding	1056.78	1.44792	0.210242	6.88694	5.7e-12	9.11e-11
ENSG00000112414	ADGRG6	protein_coding	10.8705	2.0941	0.304132	6.8855	5.76e-12	9.2e-11
ENSG00000235568	NFAM1	protein_coding	7851.58	-0.954607	0.138703	-6.8824	5.89e-12	9.39e-11
ENSG00000006638	TBXA2R	protein_coding	60.8355	1.46061	0.212275	6.88074	5.95e-12	9.5e-11
ENSG00000163464	CXCR1	protein_coding	9212.93	-1.22037	0.177381	-6.87993	5.99e-12	9.54e-11
ENSG00000120709	FAM53C	protein_coding	1409.11	-0.7872	0.114428	-6.87946	6.01e-12	9.57e-11
ENSG00000291127	ANKRD36BP2	lncRNA	22.7215	2.18775	0.318018	6.87934	6.01e-12	9.57e-11
ENSG00000067445	TRO	protein_coding	12.4328	2.0309	0.295232	6.87899	6.03e-12	9.59e-11
ENSG00000118513	MYB	protein_coding	112.547	1.83086	0.266165	6.87867	6.04e-12	9.61e-11
ENSG00000115828	QPCT	protein_coding	1733.14	-0.896904	0.13047	-6.87443	6.22e-12	9.89e-11
ENSG00000112624	BICRAL	protein_coding	448.094	-0.654825	0.0952804	-6.87261	6.3e-12	1e-10
ENSG00000204577	LILRB3	protein_coding	3685.64	-1.02945	0.14992	-6.86664	6.57e-12	1.04e-10
ENSG00000204525	HLA-C	protein_coding	53958.3	-1.12121	0.163367	-6.86316	6.74e-12	1.07e-10
ENSG00000238062	SPATA3-AS1	lncRNA	3.36777	-4.69114	0.683544	-6.86296	6.74e-12	1.07e-10
ENSG00000156738	MS4A1	protein_coding	1099.1	1.37797	0.200809	6.86209	6.79e-12	1.07e-10
ENSG00000107317	PTGDS	protein_coding	34.3352	-2.26572	0.330283	-6.85993	6.89e-12	1.09e-10
ENSG00000242247	ARFGAP3	protein_coding	458.145	-0.611627	0.0891977	-6.85698	7.03e-12	1.11e-10
ENSG00000117450	PRDX1	protein_coding	866.534	0.749253	0.109304	6.85474	7.14e-12	1.13e-10
ENSG00000137575	SDCBP	protein_coding	7340.77	-0.849851	0.124071	-6.84974	7.4e-12	1.17e-10
ENSG00000177301	KCNA2	protein_coding	6.79214	-4.15066	0.606103	-6.8481	7.48e-12	1.18e-10
ENSG00000136213	CHST12	protein_coding	348.748	-1.13227	0.165351	-6.84765	7.51e-12	1.18e-10
ENSG00000148908	RGS10	protein_coding	1893.35	1.29568	0.189429	6.83992	7.92e-12	1.25e-10
ENSG00000143786	CNIH3	protein_coding	50.8884	1.86856	0.273252	6.83824	8.02e-12	1.26e-10
ENSG00000117650	NEK2	protein_coding	15.1115	1.71154	0.250302	6.8379	8.04e-12	1.26e-10
ENSG00000111913	RIPOR2	protein_coding	8236.43	-0.688175	0.100649	-6.83738	8.07e-12	1.27e-10
ENSG00000125375	DMAC2L	protein_coding	79.5912	1.14333	0.167234	6.83671	8.1e-12	1.27e-10
ENSG00000048740	CELF2	protein_coding	3268.33	-0.793241	0.116043	-6.83574	8.16e-12	1.28e-10
ENSG00000162694	EXTL2	protein_coding	31.3876	1.36941	0.200348	6.83515	8.19e-12	1.29e-10
ENSG00000132256	TRIM5	protein_coding	296.064	-0.682453	0.099847	-6.83498	8.2e-12	1.29e-10
ENSG00000135426	TESPA1	protein_coding	781.887	0.834805	0.122238	6.82933	8.53e-12	1.34e-10
ENSG00000113532	ST8SIA4	protein_coding	1204.94	-1.16686	0.17088	-6.82853	8.58e-12	1.34e-10
ENSG00000238121	LINC00426	lncRNA	68.8213	-1.06691	0.156275	-6.82712	8.66e-12	1.36e-10
ENSG00000214706	IFRD2	protein_coding	303.737	1.17603	0.172267	6.82681	8.68e-12	1.36e-10
ENSG00000136938	ANP32B	protein_coding	3824.88	1.05778	0.154964	6.826	8.73e-12	1.37e-10
ENSG00000170962	PDGFD	protein_coding	47.806	-1.6302	0.238898	-6.82385	8.86e-12	1.39e-10
ENSG00000225194	LINC00092	lncRNA	9.85802	-2.63563	0.386244	-6.82374	8.87e-12	1.39e-10
ENSG00000165716	DIPK1B	protein_coding	42.4725	1.59303	0.23356	6.82065	9.06e-12	1.41e-10
ENSG00000228162	ENSG00000228162	lncRNA	24.6617	1.30073	0.190754	6.81888	9.18e-12	1.43e-10
ENSG00000102287	GABRE	protein_coding	8.42018	3.86255	0.566723	6.81559	9.39e-12	1.46e-10
ENSG00000172057	ORMDL3	protein_coding	2002.14	0.999027	0.146729	6.80867	9.85e-12	1.54e-10
ENSG00000163625	WDFY3	protein_coding	921.659	-1.25187	0.183901	-6.80732	9.94e-12	1.55e-10
ENSG00000070501	POLB	protein_coding	235.525	-0.597842	0.0878648	-6.80411	1.02e-11	1.58e-10
ENSG00000084676	NCOA1	protein_coding	1045.58	-0.739407	0.108686	-6.80316	1.02e-11	1.59e-10
ENSG00000141034	GID4	protein_coding	472.374	1.24463	0.182955	6.80294	1.03e-11	1.59e-10
ENSG00000131462	TUBG1	protein_coding	95.3275	1.2599	0.185345	6.7976	1.06e-11	1.65e-10
ENSG00000262714	ENSG00000262714	lncRNA	69.8848	-1.93077	0.284056	-6.79715	1.07e-11	1.66e-10
ENSG00000114812	VIPR1	protein_coding	267.567	0.940707	0.138423	6.7959	1.08e-11	1.67e-10
ENSG00000142347	MYO1F	protein_coding	12749.1	-0.973515	0.143299	-6.79358	1.09e-11	1.7e-10
ENSG00000169884	WNT10B	protein_coding	29.98	-1.53748	0.226376	-6.79168	1.11e-11	1.72e-10
ENSG00000243055	GK-AS1	lncRNA	33.8767	-1.851	0.272595	-6.79028	1.12e-11	1.73e-10
ENSG00000170837	GPR27	protein_coding	336.105	-1.10834	0.163229	-6.79008	1.12e-11	1.73e-10
ENSG00000173585	CCR9	protein_coding	34.0095	1.68686	0.248451	6.78951	1.13e-11	1.74e-10
ENSG00000112695	COX7A2	protein_coding	476.799	1.03852	0.152961	6.78945	1.13e-11	1.74e-10
ENSG00000225886	ENSG00000225886	lncRNA	10.7836	-2.9726	0.437876	-6.78868	1.13e-11	1.75e-10
ENSG00000060237	WNK1	protein_coding	4743.4	1.09592	0.161436	6.78861	1.13e-11	1.75e-10
ENSG00000073331	ALPK1	protein_coding	1508.9	-0.90168	0.13285	-6.78719	1.14e-11	1.76e-10
ENSG00000253364	COPDA1	lncRNA	9.53938	-2.90055	0.427389	-6.78666	1.15e-11	1.77e-10
ENSG00000138430	OLA1	protein_coding	353.476	0.631558	0.0930613	6.78647	1.15e-11	1.77e-10
ENSG00000073910	FRY	protein_coding	559.057	-0.956935	0.141106	-6.78169	1.19e-11	1.83e-10
ENSG00000008441	NFIX	protein_coding	1714.38	1.65902	0.244669	6.78068	1.2e-11	1.84e-10
ENSG00000101236	RNF24	protein_coding	1190.97	-1.31263	0.193608	-6.77987	1.2e-11	1.85e-10
ENSG00000221869	CEBPD	protein_coding	1877.35	-0.877334	0.129436	-6.77814	1.22e-11	1.87e-10
ENSG00000244300	GATA2-AS1	lncRNA	4.95598	3.18041	0.469219	6.77809	1.22e-11	1.87e-10
ENSG00000261644	CYLD-AS1	lncRNA	77.9454	-0.902887	0.133233	-6.77676	1.23e-11	1.89e-10
ENSG00000211897	IGHG3	IG_C_gene	67.8716	-2.73727	0.404122	-6.77337	1.26e-11	1.93e-10
ENSG00000184060	ADAP2	protein_coding	163.239	-0.857121	0.126569	-6.77199	1.27e-11	1.95e-10
ENSG00000112297	CRYBG1	protein_coding	1034.46	-0.620819	0.0916833	-6.77134	1.28e-11	1.96e-10
ENSG00000008513	ST3GAL1	protein_coding	2518.24	0.859052	0.126873	6.77095	1.28e-11	1.96e-10
ENSG00000104714	ERICH1	protein_coding	399.314	-0.623529	0.0921406	-6.76715	1.31e-11	2.01e-10
ENSG00000051180	RAD51	protein_coding	27.3333	1.57608	0.232905	6.76704	1.31e-11	2.01e-10
ENSG00000073737	DHRS9	protein_coding	228.781	-1.13615	0.167906	-6.76656	1.32e-11	2.02e-10
ENSG00000186998	EMID1	protein_coding	98.7654	2.08259	0.307819	6.76563	1.33e-11	2.03e-10
ENSG00000289497	ENSG00000289497	lncRNA	3.83664	3.96026	0.585427	6.76473	1.34e-11	2.04e-10
ENSG00000258227	CLEC5A	protein_coding	185.865	1.57459	0.232931	6.75989	1.38e-11	2.11e-10
ENSG00000170458	CD14	protein_coding	3401.8	-1.15446	0.17081	-6.75872	1.39e-11	2.12e-10
ENSG00000171596	NMUR1	protein_coding	111.374	-2.25198	0.333244	-6.75777	1.4e-11	2.14e-10
ENSG00000054983	GALC	protein_coding	401.243	-0.784514	0.116092	-6.7577	1.4e-11	2.14e-10
ENSG00000125864	BFSP1	protein_coding	12.5974	-2.77793	0.411187	-6.75589	1.42e-11	2.16e-10
ENSG00000005102	MEOX1	protein_coding	35.2634	2.08949	0.309328	6.75491	1.43e-11	2.17e-10
ENSG00000147883	CDKN2B	protein_coding	28.5902	-1.47312	0.218157	-6.75255	1.45e-11	2.21e-10
ENSG00000111796	KLRB1	protein_coding	250.399	-1.22759	0.181817	-6.75182	1.46e-11	2.22e-10
ENSG00000133794	BMAL1	protein_coding	446.135	-0.851907	0.126186	-6.7512	1.47e-11	2.23e-10
ENSG00000137812	KNL1	protein_coding	27.8573	1.51996	0.225182	6.74993	1.48e-11	2.25e-10
ENSG00000073792	IGF2BP2	protein_coding	1562.29	1.79676	0.266288	6.74742	1.5e-11	2.28e-10
ENSG00000269378	ITGB1P1	processed_pseudogene	69.167	-0.988096	0.146442	-6.74736	1.51e-11	2.28e-10
ENSG00000145685	LHFPL2	protein_coding	152.58	-0.873238	0.129422	-6.74722	1.51e-11	2.28e-10
ENSG00000119686	FLVCR2	protein_coding	95.0216	-0.87235	0.129316	-6.74588	1.52e-11	2.3e-10
ENSG00000247134	ENSG00000247134	lncRNA	13.9696	1.57769	0.233895	6.7453	1.53e-11	2.31e-10
ENSG00000167419	LPO	protein_coding	10.5673	3.91321	0.580188	6.74473	1.53e-11	2.32e-10
ENSG00000274376	ADAMTS7P1	transcribed_unprocessed_pseudogene	20.6124	1.94999	0.28919	6.74295	1.55e-11	2.35e-10
ENSG00000164045	CDC25A	protein_coding	19.8914	1.98808	0.294865	6.74231	1.56e-11	2.36e-10
ENSG00000183742	MACC1	protein_coding	10.9717	1.81452	0.269147	6.74173	1.57e-11	2.36e-10
ENSG00000248019	FAM13A-AS1	lncRNA	372.204	-0.970351	0.144077	-6.73494	1.64e-11	2.47e-10
ENSG00000072571	HMMR	protein_coding	24.7289	1.69968	0.252369	6.73488	1.64e-11	2.47e-10
ENSG00000162747	FCGR3B	protein_coding	29705.7	-1.49294	0.221723	-6.73333	1.66e-11	2.5e-10
ENSG00000171848	RRM2	protein_coding	131.154	1.43788	0.213574	6.7325	1.67e-11	2.51e-10
ENSG00000167470	MIDN	protein_coding	2014.76	-0.882855	0.13116	-6.73112	1.68e-11	2.53e-10
ENSG00000108932	SLC16A6	protein_coding	200.594	-1.00297	0.149034	-6.72985	1.7e-11	2.56e-10
ENSG00000070413	DGCR2	protein_coding	1338.11	-0.831461	0.123623	-6.72579	1.75e-11	2.63e-10
ENSG00000136404	TM6SF1	protein_coding	125.204	-1.0299	0.153182	-6.7234	1.78e-11	2.67e-10
ENSG00000235531	MSC-AS1	lncRNA	7.16745	-2.65166	0.394451	-6.72241	1.79e-11	2.68e-10
ENSG00000119711	ALDH6A1	protein_coding	85.9808	0.756722	0.112609	6.71988	1.82e-11	2.73e-10
ENSG00000235194	PPP1R3E	protein_coding	248.234	0.705776	0.10504	6.71909	1.83e-11	2.74e-10
ENSG00000198933	TBKBP1	protein_coding	501.893	-1.46418	0.218033	-6.71541	1.88e-11	2.81e-10
ENSG00000029534	ANK1	protein_coding	2864.7	1.75752	0.261767	6.71408	1.89e-11	2.84e-10
ENSG00000206561	COLQ	protein_coding	76.4808	-1.39833	0.208295	-6.71321	1.9e-11	2.85e-10
ENSG00000189350	TOGARAM2	protein_coding	44.8593	-1.58217	0.235684	-6.71312	1.91e-11	2.85e-10
ENSG00000185760	KCNQ5	protein_coding	31.9455	1.13717	0.169427	6.71186	1.92e-11	2.87e-10
ENSG00000069667	RORA	protein_coding	429.565	-1.34699	0.200736	-6.71028	1.94e-11	2.9e-10
ENSG00000101194	SLC17A9	protein_coding	98.6895	1.09432	0.163088	6.70998	1.95e-11	2.91e-10
ENSG00000184792	OSBP2	protein_coding	4313.42	1.79789	0.267964	6.70944	1.95e-11	2.92e-10
ENSG00000101265	RASSF2	protein_coding	7044.68	-0.733872	0.109461	-6.70442	2.02e-11	3.02e-10
ENSG00000108950	FAM20A	protein_coding	19.6345	-2.12059	0.316314	-6.70407	2.03e-11	3.02e-10
ENSG00000105374	NKG7	protein_coding	2470.61	-1.73209	0.25838	-6.70368	2.03e-11	3.03e-10
ENSG00000067248	DHX29	protein_coding	335.48	0.752733	0.112347	6.7001	2.08e-11	3.1e-10
ENSG00000286602	ENSG00000286602	lncRNA	11.5209	3.00256	0.448291	6.69778	2.12e-11	3.15e-10
ENSG00000204131	NHSL2	protein_coding	1441.91	-0.856705	0.12794	-6.69614	2.14e-11	3.18e-10
ENSG00000289582	ENSG00000289582	lncRNA	7.50472	-3.08667	0.460974	-6.69596	2.14e-11	3.19e-10
ENSG00000174444	RPL4	protein_coding	12234.6	0.652563	0.0974727	6.69483	2.16e-11	3.21e-10
ENSG00000185591	SP1	protein_coding	2228.52	-0.65488	0.0978336	-6.69382	2.17e-11	3.23e-10
ENSG00000177885	GRB2	protein_coding	5037.12	-0.592139	0.0885754	-6.68514	2.31e-11	3.43e-10
ENSG00000139832	RAB20	protein_coding	206.922	-1.18638	0.17756	-6.68156	2.36e-11	3.51e-10
ENSG00000114013	CD86	protein_coding	505.553	-0.617149	0.0924091	-6.67845	2.41e-11	3.58e-10
ENSG00000120659	TNFSF11	protein_coding	4.15667	3.34171	0.500381	6.67834	2.42e-11	3.58e-10
ENSG00000223552	CCR5AS	lncRNA	93.5236	1.61609	0.242078	6.67592	2.46e-11	3.64e-10
ENSG00000182985	CADM1	protein_coding	12.2999	-2.49941	0.374434	-6.67516	2.47e-11	3.65e-10
ENSG00000174348	PODN	protein_coding	9.2227	-3.56573	0.534391	-6.67252	2.51e-11	3.72e-10
ENSG00000173531	MST1	protein_coding	57.9794	1.36101	0.204032	6.67059	2.55e-11	3.77e-10
ENSG00000198585	NUDT16	protein_coding	753.29	-0.659306	0.0988451	-6.67009	2.56e-11	3.78e-10
ENSG00000290585	ENSG00000290585	lncRNA	80.0439	-1.85263	0.277773	-6.66958	2.57e-11	3.79e-10
ENSG00000162976	SLC66A3	protein_coding	330.476	-0.744809	0.111681	-6.66908	2.57e-11	3.8e-10
ENSG00000172183	ISG20	protein_coding	1320.48	-0.695079	0.104225	-6.66905	2.57e-11	3.8e-10
ENSG00000149273	RPS3	protein_coding	8182.85	0.642054	0.0962791	6.66868	2.58e-11	3.8e-10
ENSG00000272941	ENSG00000272941	lncRNA	19.1971	-1.54115	0.231118	-6.66822	2.59e-11	3.81e-10
ENSG00000166965	RCCD1	protein_coding	52.8613	1.08669	0.162971	6.668	2.59e-11	3.82e-10
ENSG00000143858	SYT2	protein_coding	26.2317	-1.79872	0.269757	-6.66793	2.59e-11	3.82e-10
ENSG00000174233	ADCY6	protein_coding	15.0606	2.20033	0.330036	6.66695	2.61e-11	3.84e-10
ENSG00000146670	CDCA5	protein_coding	40.0194	1.65001	0.247498	6.66675	2.62e-11	3.84e-10
ENSG00000186648	CARMIL3	protein_coding	24.8568	-2.06953	0.310451	-6.6662	2.63e-11	3.86e-10
ENSG00000146733	PSPH	protein_coding	46.3743	0.992233	0.148866	6.66529	2.64e-11	3.88e-10
ENSG00000225964	NRIR	lncRNA	91.5786	1.04197	0.156341	6.6647	2.65e-11	3.89e-10
ENSG00000111665	CDCA3	protein_coding	20.1649	1.91071	0.286717	6.6641	2.66e-11	3.9e-10
ENSG00000283041	ENSG00000283041	processed_pseudogene	1683.32	0.697252	0.10463	6.66395	2.67e-11	3.91e-10
ENSG00000184515	BEX5	protein_coding	5.54217	-3.64618	0.547283	-6.66233	2.7e-11	3.95e-10
ENSG00000229425	ENSG00000229425	lncRNA	6.70156	2.62041	0.393418	6.66063	2.73e-11	3.99e-10
ENSG00000119326	CTNNAL1	protein_coding	210.8	1.93894	0.291133	6.65996	2.74e-11	4.01e-10
ENSG00000082996	RNF13	protein_coding	976.741	-1.0316	0.154948	-6.65775	2.78e-11	4.07e-10
ENSG00000197380	DACT3	protein_coding	5.70845	2.98822	0.448887	6.65695	2.8e-11	4.09e-10
ENSG00000142599	RERE	protein_coding	1830.31	-0.827229	0.124269	-6.65675	2.8e-11	4.09e-10
ENSG00000164068	RNF123	protein_coding	1589.74	1.42821	0.214639	6.65401	2.85e-11	4.16e-10
ENSG00000238222	MKRN4P	processed_pseudogene	91.6246	1.57255	0.236349	6.6535	2.86e-11	4.17e-10
ENSG00000084693	AGBL5	protein_coding	166.378	0.775009	0.116547	6.64978	2.94e-11	4.28e-10
ENSG00000135476	ESPL1	protein_coding	28.5056	1.54873	0.232938	6.64867	2.96e-11	4.31e-10
ENSG00000072786	STK10	protein_coding	4096.06	-0.739415	0.111243	-6.64683	2.99e-11	4.36e-10
ENSG00000130821	SLC6A8	protein_coding	3124.46	1.72043	0.258871	6.64591	3.01e-11	4.39e-10
ENSG00000107331	ABCA2	protein_coding	709.491	-1.19997	0.180622	-6.64353	3.06e-11	4.45e-10
ENSG00000180155	LYNX1	protein_coding	28.3571	-2.48621	0.374309	-6.64214	3.09e-11	4.49e-10
ENSG00000095585	BLNK	protein_coding	128.263	1.08007	0.162646	6.64064	3.12e-11	4.54e-10
ENSG00000125084	WNT1	protein_coding	11.1072	-2.34721	0.353478	-6.64033	3.13e-11	4.55e-10
ENSG00000135842	NIBAN1	protein_coding	6673.53	-1.20679	0.181745	-6.64001	3.14e-11	4.55e-10
ENSG00000129932	DOHH	protein_coding	187.477	1.55143	0.233691	6.63879	3.16e-11	4.59e-10
ENSG00000185722	ANKFY1	protein_coding	590.227	-0.628327	0.0946661	-6.6373	3.19e-11	4.63e-10
ENSG00000130150	MOSPD2	protein_coding	710.305	-1.21356	0.182883	-6.6357	3.23e-11	4.68e-10
ENSG00000142611	PRDM16	protein_coding	3.32667	4.29057	0.646629	6.63528	3.24e-11	4.69e-10
ENSG00000104490	NCALD	protein_coding	152.664	-0.874381	0.131802	-6.63405	3.27e-11	4.73e-10
ENSG00000162630	B3GALT2	protein_coding	7.07522	-3.71378	0.559904	-6.63289	3.29e-11	4.76e-10
ENSG00000255545	B3GAT1-DT	lncRNA	4.39026	-4.65772	0.702363	-6.63149	3.32e-11	4.8e-10
ENSG00000106066	CPVL	protein_coding	1987.9	-0.736657	0.111115	-6.62969	3.36e-11	4.86e-10
ENSG00000285557	ENSG00000285557	lncRNA	5.88049	2.93343	0.442502	6.62919	3.38e-11	4.87e-10
ENSG00000168734	PKIG	protein_coding	79.7834	1.1545	0.174175	6.62844	3.39e-11	4.9e-10
ENSG00000130766	SESN2	protein_coding	163.125	-0.949265	0.143218	-6.62811	3.4e-11	4.9e-10
ENSG00000123612	ACVR1C	protein_coding	8.42628	-3.74956	0.565792	-6.6271	3.42e-11	4.94e-10
ENSG00000196407	THEM5	protein_coding	173.749	2.10594	0.317817	6.62629	3.44e-11	4.96e-10
ENSG00000213903	LTB4R	protein_coding	1121.55	-0.813968	0.122908	-6.62255	3.53e-11	5.08e-10
ENSG00000145819	ARHGAP26	protein_coding	1813.23	-0.838953	0.126696	-6.62178	3.55e-11	5.11e-10
ENSG00000174891	RSRC1	protein_coding	199.058	1.00939	0.152515	6.61832	3.63e-11	5.23e-10
ENSG00000125505	MBOAT7	protein_coding	4810.22	-1.11939	0.169139	-6.61815	3.64e-11	5.23e-10
ENSG00000242324	ENSG00000242324	unprocessed_pseudogene	15.5068	-1.68481	0.254607	-6.61729	3.66e-11	5.26e-10
ENSG00000011201	ANOS1	protein_coding	6.40259	-3.44388	0.52047	-6.61687	3.67e-11	5.27e-10
ENSG00000138463	SLC49A4	protein_coding	143.777	-0.984473	0.148801	-6.61603	3.69e-11	5.3e-10
ENSG00000112303	VNN2	protein_coding	9905.13	-1.12867	0.170603	-6.61578	3.7e-11	5.3e-10
ENSG00000289019	ENSG00000289019	lncRNA	7.52761	2.70197	0.408567	6.61328	3.76e-11	5.39e-10
ENSG00000043143	JADE2	protein_coding	788.723	-0.710607	0.107479	-6.61159	3.8e-11	5.45e-10
ENSG00000111344	RASAL1	protein_coding	4.37178	3.5825	0.541909	6.61089	3.82e-11	5.47e-10
ENSG00000183166	CALN1	protein_coding	2.91184	4.38587	0.663488	6.61032	3.83e-11	5.49e-10
ENSG00000116729	WLS	protein_coding	472.584	-1.3604	0.205834	-6.60918	3.86e-11	5.53e-10
ENSG00000140464	PML	protein_coding	714.95	-0.995485	0.150667	-6.60719	3.92e-11	5.6e-10
ENSG00000080845	DLGAP4	protein_coding	377.648	-0.690047	0.104468	-6.60537	3.97e-11	5.67e-10
ENSG00000115607	IL18RAP	protein_coding	685.394	-1.68787	0.255576	-6.60419	4e-11	5.71e-10
ENSG00000241839	PLEKHO2	protein_coding	2411.43	-0.908205	0.137525	-6.60393	4e-11	5.71e-10
ENSG00000122034	GTF3A	protein_coding	1145.71	0.609399	0.0923176	6.60112	4.08e-11	5.82e-10
ENSG00000117602	RCAN3	protein_coding	680.034	0.885119	0.134098	6.60056	4.1e-11	5.84e-10
ENSG00000022840	RNF10	protein_coding	18606.4	1.44445	0.218915	6.59823	4.16e-11	5.93e-10
ENSG00000179855	GIPC3	protein_coding	40.9915	1.61538	0.244881	6.59659	4.21e-11	5.99e-10
ENSG00000286672	ENSG00000286672	lncRNA	9.47912	2.24391	0.340229	6.59529	4.24e-11	6.04e-10
ENSG00000130813	SHFL	protein_coding	357.025	-0.765633	0.11609	-6.5952	4.25e-11	6.04e-10
ENSG00000213719	CLIC1	protein_coding	5262.52	-0.619318	0.0939062	-6.59507	4.25e-11	6.04e-10
ENSG00000130449	ZSWIM6	protein_coding	290.918	-1.04989	0.15923	-6.59352	4.3e-11	6.1e-10
ENSG00000184986	TMEM121	protein_coding	10.7866	1.91738	0.290983	6.58931	4.42e-11	6.27e-10
ENSG00000163328	GPR155	protein_coding	526.314	-0.999308	0.151712	-6.58687	4.49e-11	6.37e-10
ENSG00000106477	CEP41	protein_coding	82.5232	0.83481	0.126743	6.58665	4.5e-11	6.38e-10
ENSG00000175489	LRRC25	protein_coding	2611.19	-0.892413	0.135614	-6.58055	4.69e-11	6.64e-10
ENSG00000249978	TRGV7	TR_V_pseudogene	30.8971	-1.90657	0.289786	-6.57923	4.73e-11	6.69e-10
ENSG00000160796	NBEAL2	protein_coding	4564.15	-1.02792	0.156251	-6.57862	4.75e-11	6.71e-10
ENSG00000244198	ARHGEF35-AS1	lncRNA	52.6476	1.49763	0.227675	6.57794	4.77e-11	6.74e-10
ENSG00000088538	DOCK3	protein_coding	6.57087	-2.79877	0.42551	-6.57745	4.79e-11	6.76e-10
ENSG00000237424	FOXD2-AS1	lncRNA	22.5481	-1.58645	0.241315	-6.5742	4.89e-11	6.9e-10
ENSG00000186197	EDARADD	protein_coding	7.69352	-2.20387	0.335371	-6.57144	4.98e-11	7.03e-10
ENSG00000256862	PARP11-AS1	lncRNA	52.6587	1.73139	0.263492	6.57093	5e-11	7.05e-10
ENSG00000100234	TIMP3	protein_coding	21.7962	2.71579	0.413423	6.56903	5.06e-11	7.13e-10
ENSG00000136908	DPM2	protein_coding	2221.56	1.67413	0.254912	6.56749	5.12e-11	7.2e-10
ENSG00000129465	RIPK3	protein_coding	245.48	-0.779263	0.118678	-6.56618	5.16e-11	7.26e-10
ENSG00000092010	PSME1	protein_coding	2963.82	-0.762575	0.116216	-6.56173	5.32e-11	7.48e-10
ENSG00000125384	PTGER2	protein_coding	440.929	-0.758904	0.115668	-6.56108	5.34e-11	7.5e-10
ENSG00000165511	ZNF22-AS1	lncRNA	13.6491	1.49984	0.228713	6.55775	5.46e-11	7.67e-10
ENSG00000238000	PSME2P1	processed_pseudogene	29.8941	-1.24802	0.190354	-6.55633	5.51e-11	7.74e-10
ENSG00000236753	MKLN1-AS	lncRNA	59.2889	1.24401	0.18976	6.55571	5.54e-11	7.77e-10
ENSG00000131042	LILRB2	protein_coding	3372.89	-0.855126	0.130484	-6.55347	5.62e-11	7.88e-10
ENSG00000154328	NEIL2	protein_coding	132.356	0.668578	0.102051	6.55139	5.7e-11	7.99e-10
ENSG00000130165	ELOF1	protein_coding	1332.44	1.30531	0.199327	6.54856	5.81e-11	8.13e-10
ENSG00000107201	RIGI	protein_coding	31.1047	-1.3547	0.206885	-6.54811	5.83e-11	8.15e-10
ENSG00000197746	PSAP	protein_coding	27098.4	-0.76082	0.116196	-6.54776	5.84e-11	8.17e-10
ENSG00000197753	LHFPL5	protein_coding	58.2266	-1.64957	0.251956	-6.54704	5.87e-11	8.2e-10
ENSG00000135677	GNS	protein_coding	2237.23	-0.662499	0.101215	-6.54546	5.93e-11	8.29e-10
ENSG00000185271	KLHL33	protein_coding	14.9434	2.01777	0.308411	6.54248	6.05e-11	8.45e-10
ENSG00000137038	DMAC1	protein_coding	191.955	0.921268	0.140834	6.5415	6.09e-11	8.49e-10
ENSG00000283787	PRR33	protein_coding	939.748	-0.761835	0.116466	-6.54129	6.1e-11	8.5e-10
ENSG00000226121	AHCTF1P1	processed_pseudogene	71.5285	-1.13098	0.172993	-6.5377	6.25e-11	8.7e-10
ENSG00000136738	STAM	protein_coding	178.692	0.706656	0.108093	6.5375	6.26e-11	8.71e-10
ENSG00000050327	ARHGEF5	protein_coding	41.8941	1.23566	0.189064	6.53564	6.33e-11	8.82e-10
ENSG00000230724	LINC01001	lncRNA	223.879	-1.57562	0.241283	-6.53017	6.57e-11	9.14e-10
ENSG00000119636	BBOF1	protein_coding	350.057	1.59637	0.244612	6.52615	6.75e-11	9.38e-10
ENSG00000111424	VDR	protein_coding	305.386	-0.829211	0.12709	-6.52459	6.82e-11	9.47e-10
ENSG00000140932	CMTM2	protein_coding	1196.13	-1.05384	0.161549	-6.52338	6.87e-11	9.55e-10
ENSG00000120278	PLEKHG1	protein_coding	74.7461	1.26593	0.19414	6.5207	7e-11	9.71e-10
ENSG00000233184	DPH5-DT	lncRNA	105.902	1.24029	0.190247	6.51936	7.06e-11	9.8e-10
ENSG00000183696	UPP1	protein_coding	835.366	-0.741105	0.113688	-6.51874	7.09e-11	9.83e-10
ENSG00000187608	ISG15	protein_coding	634.816	-1.37758	0.211347	-6.51808	7.12e-11	9.87e-10
ENSG00000080573	COL5A3	protein_coding	6.55746	-4.2335	0.649546	-6.51763	7.14e-11	9.89e-10
ENSG00000158470	B4GALT5	protein_coding	2086.84	-0.974379	0.149517	-6.51684	7.18e-11	9.94e-10
ENSG00000065615	CYB5R4	protein_coding	942.951	-0.895736	0.137458	-6.51642	7.2e-11	9.96e-10
ENSG00000162511	LAPTM5	protein_coding	9821.29	-0.786916	0.120783	-6.51513	7.26e-11	1e-09
ENSG00000149054	ZNF215	protein_coding	8.08376	3.30456	0.507258	6.51456	7.29e-11	1.01e-09
ENSG00000164867	NOS3	protein_coding	20.989	1.43672	0.22063	6.51189	7.42e-11	1.03e-09
ENSG00000189430	NCR1	protein_coding	75.9908	-1.44036	0.221254	-6.50998	7.52e-11	1.04e-09
ENSG00000184979	USP18	protein_coding	38.8789	-1.2581	0.193296	-6.50868	7.58e-11	1.05e-09
ENSG00000130702	LAMA5	protein_coding	31.372	1.45312	0.223411	6.50424	7.81e-11	1.08e-09
ENSG00000158525	CPA5	protein_coding	9.34046	2.90437	0.446562	6.50383	7.83e-11	1.08e-09
ENSG00000159055	MIS18A	protein_coding	53.0061	0.839463	0.129074	6.50372	7.84e-11	1.08e-09
ENSG00000102098	SCML2	protein_coding	13.3385	1.77199	0.272463	6.50359	7.84e-11	1.08e-09
ENSG00000185090	MANEAL	protein_coding	6.09789	-2.85138	0.438785	-6.49835	8.12e-11	1.12e-09
ENSG00000165516	KLHDC2	protein_coding	323.047	0.734669	0.1131	6.49572	8.26e-11	1.14e-09
ENSG00000113761	ZNF346	protein_coding	247.803	0.758602	0.116833	6.49307	8.41e-11	1.16e-09
ENSG00000103534	TMC5	protein_coding	62.8786	1.61696	0.249099	6.49121	8.52e-11	1.17e-09
ENSG00000289172	ENSG00000289172	lncRNA	273.852	-1.89268	0.291662	-6.48931	8.62e-11	1.18e-09
ENSG00000070404	FSTL3	protein_coding	129.79	1.60227	0.246965	6.48782	8.71e-11	1.2e-09
ENSG00000086967	MYBPC2	protein_coding	5.82531	3.12624	0.481932	6.48689	8.76e-11	1.2e-09
ENSG00000077420	APBB1IP	protein_coding	3893.55	-0.900708	0.138863	-6.48633	8.8e-11	1.21e-09
ENSG00000273033	LINC02035	lncRNA	272.814	-1.02573	0.15815	-6.48581	8.83e-11	1.21e-09
ENSG00000159958	TNFRSF13C	protein_coding	218.137	1.14672	0.176818	6.48532	8.85e-11	1.21e-09
ENSG00000104974	LILRA1	protein_coding	1092.16	-0.838419	0.129317	-6.48343	8.97e-11	1.23e-09
ENSG00000088881	EBF4	protein_coding	9.51507	-2.65179	0.409025	-6.4832	8.98e-11	1.23e-09
ENSG00000267534	S1PR2	protein_coding	34.3825	-1.22893	0.189581	-6.48232	9.03e-11	1.24e-09
ENSG00000290385	ENSG00000290385	lncRNA	186.989	-1.59617	0.24627	-6.48141	9.09e-11	1.24e-09
ENSG00000287566	ENSG00000287566	lncRNA	1.76958	4.67708	0.721675	6.48087	9.12e-11	1.25e-09
ENSG00000167461	RAB8A	protein_coding	524.343	-0.603506	0.093179	-6.47684	9.37e-11	1.28e-09
ENSG00000179262	RAD23A	protein_coding	1888.14	1.34687	0.208016	6.47486	9.49e-11	1.29e-09
ENSG00000254363	ENSG00000254363	lncRNA	5.82179	-3.47013	0.535982	-6.47434	9.52e-11	1.3e-09
ENSG00000110876	SELPLG	protein_coding	6433.03	-0.969059	0.149708	-6.47301	9.61e-11	1.31e-09
ENSG00000115944	COX7A2L	protein_coding	624.219	0.760998	0.117574	6.4725	9.64e-11	1.31e-09
ENSG00000178996	SNX18	protein_coding	912.144	-0.947349	0.14637	-6.47231	9.65e-11	1.31e-09
ENSG00000246223	LINC01550	lncRNA	73.583	0.837555	0.129424	6.47143	9.71e-11	1.32e-09
ENSG00000166987	MBD6	protein_coding	1021.17	-0.898054	0.138862	-6.46723	9.98e-11	1.36e-09
ENSG00000204308	RNF5	protein_coding	536.182	0.820481	0.126898	6.46569	1.01e-10	1.37e-09
ENSG00000075399	VPS9D1	protein_coding	351.834	-1.1859	0.183517	-6.46208	1.03e-10	1.4e-09
ENSG00000184611	KCNH7	protein_coding	53.2878	-1.68252	0.260384	-6.46167	1.04e-10	1.4e-09
ENSG00000159110	IFNAR2	protein_coding	243.605	-1.18868	0.183994	-6.46045	1.04e-10	1.42e-09
ENSG00000115661	STK16	protein_coding	330.178	0.749095	0.115953	6.46035	1.04e-10	1.42e-09
ENSG00000165416	SUGT1	protein_coding	359.727	0.63077	0.0976734	6.45795	1.06e-10	1.44e-09
ENSG00000013364	MVP	protein_coding	2779.98	-1.00334	0.155375	-6.45753	1.06e-10	1.44e-09
ENSG00000197457	STMN3	protein_coding	505.105	1.01631	0.157442	6.45512	1.08e-10	1.46e-09
ENSG00000155749	FLACC1	protein_coding	36.2057	1.30527	0.20234	6.45085	1.11e-10	1.5e-09
ENSG00000197461	PDGFA	protein_coding	18.8676	1.62071	0.251324	6.44872	1.13e-10	1.52e-09
ENSG00000139631	CSAD	protein_coding	363.346	-0.807014	0.12515	-6.44837	1.13e-10	1.53e-09
ENSG00000101109	STK4	protein_coding	3019.86	-0.59774	0.0927079	-6.44756	1.14e-10	1.53e-09
ENSG00000087258	GNAO1	protein_coding	25.2315	-1.71847	0.266592	-6.44607	1.15e-10	1.55e-09
ENSG00000172247	C1QTNF4	protein_coding	15.4704	3.22104	0.499751	6.44529	1.15e-10	1.56e-09
ENSG00000153944	MSI2	protein_coding	602.544	0.676744	0.105026	6.4436	1.17e-10	1.57e-09
ENSG00000144824	PHLDB2	protein_coding	31.6672	-1.34086	0.20813	-6.4424	1.18e-10	1.58e-09
ENSG00000159314	ARHGAP27	protein_coding	2750.17	-0.813622	0.126333	-6.44031	1.19e-10	1.6e-09
ENSG00000171714	ANO5	protein_coding	7.63647	-3.10667	0.482446	-6.43943	1.2e-10	1.61e-09
ENSG00000267750	RUNDC3A-AS1	lncRNA	17.4378	1.95131	0.303091	6.43805	1.21e-10	1.63e-09
ENSG00000033800	PIAS1	protein_coding	858.715	-0.605678	0.094104	-6.43626	1.22e-10	1.65e-09
ENSG00000185129	PURA	protein_coding	181.124	-0.891241	0.138592	-6.43069	1.27e-10	1.71e-09
ENSG00000163041	H3-3A	protein_coding	12006.3	-0.695944	0.108276	-6.4275	1.3e-10	1.74e-09
ENSG00000197705	KLHL14	protein_coding	39.9073	1.65794	0.257949	6.42739	1.3e-10	1.74e-09
ENSG00000149328	GLB1L2	protein_coding	14.2113	-3.09222	0.481145	-6.42679	1.3e-10	1.75e-09
ENSG00000249992	TMEM158	protein_coding	494.08	2.6064	0.405771	6.42333	1.33e-10	1.79e-09
ENSG00000222041	CYTOR	lncRNA	107.045	-0.815928	0.127034	-6.42289	1.34e-10	1.79e-09
ENSG00000010278	CD9	protein_coding	245.844	1.12099	0.174545	6.42233	1.34e-10	1.8e-09
ENSG00000162722	TRIM58	protein_coding	13732.8	1.70525	0.265686	6.41827	1.38e-10	1.84e-09
ENSG00000289135	ENSG00000289135	lncRNA	121.636	1.23474	0.192427	6.41666	1.39e-10	1.86e-09
ENSG00000148498	PARD3	protein_coding	32.9759	1.31567	0.205059	6.41606	1.4e-10	1.87e-09
ENSG00000135245	HILPDA	protein_coding	20.703	1.27216	0.198302	6.41528	1.41e-10	1.88e-09
ENSG00000107738	VSIR	protein_coding	11274.4	-0.906156	0.141343	-6.41105	1.45e-10	1.93e-09
ENSG00000159882	ZNF230	protein_coding	121.68	-1.0392	0.16212	-6.41009	1.45e-10	1.94e-09
ENSG00000268833	ENSG00000268833	lncRNA	27.4203	2.31227	0.360735	6.40988	1.46e-10	1.94e-09
ENSG00000106605	BLVRA	protein_coding	344.855	-1.05576	0.164722	-6.40932	1.46e-10	1.95e-09
ENSG00000175711	B3GNTL1	protein_coding	215.363	-0.811374	0.126603	-6.40882	1.47e-10	1.95e-09
ENSG00000144711	IQSEC1	protein_coding	3036.52	-0.645995	0.100802	-6.40855	1.47e-10	1.96e-09
ENSG00000172995	ARPP21	protein_coding	5.25969	3.16758	0.494291	6.40832	1.47e-10	1.96e-09
ENSG00000135365	PHF21A	protein_coding	1689.77	-0.689463	0.107657	-6.40428	1.51e-10	2.01e-09
ENSG00000228168	HNRNPA1P21	processed_pseudogene	7.63467	-2.67831	0.418226	-6.40397	1.51e-10	2.01e-09
ENSG00000019995	ZRANB1	protein_coding	348.765	0.944399	0.147496	6.40286	1.52e-10	2.03e-09
ENSG00000164054	SHISA5	protein_coding	3807.27	-0.903211	0.141092	-6.40156	1.54e-10	2.04e-09
ENSG00000167633	KIR3DL1	protein_coding	29.5058	-3.4883	0.544917	-6.40151	1.54e-10	2.04e-09
ENSG00000186517	ARHGAP30	protein_coding	8946.71	-0.616499	0.0963152	-6.40085	1.55e-10	2.05e-09
ENSG00000157827	FMNL2	protein_coding	45.11	-1.23862	0.193544	-6.39969	1.56e-10	2.06e-09
ENSG00000058799	YIPF1	protein_coding	502.649	-0.773747	0.120929	-6.39837	1.57e-10	2.08e-09
ENSG00000223482	NUTM2A-AS1	lncRNA	489.968	0.940726	0.147071	6.39639	1.59e-10	2.11e-09
ENSG00000248893	FAM138E	lncRNA	4.74942	3.34142	0.52265	6.39322	1.62e-10	2.15e-09
ENSG00000100823	APEX1	protein_coding	984.918	0.655207	0.102578	6.38742	1.69e-10	2.23e-09
ENSG00000167676	PLIN4	protein_coding	327.299	-1.27445	0.199531	-6.38722	1.69e-10	2.23e-09
ENSG00000070614	NDST1	protein_coding	683.382	-1.04129	0.163055	-6.38612	1.7e-10	2.25e-09
ENSG00000168010	ATG16L2	protein_coding	5237.43	-0.767813	0.120235	-6.38592	1.7e-10	2.25e-09
ENSG00000205581	HMGN1	protein_coding	1300.78	0.610298	0.0955709	6.38581	1.7e-10	2.25e-09
ENSG00000271751	ENSG00000271751	lncRNA	6.41202	2.14877	0.336524	6.38519	1.71e-10	2.26e-09
ENSG00000138185	ENTPD1	protein_coding	993.544	-0.724015	0.113392	-6.38509	1.71e-10	2.26e-09
ENSG00000283602	ENSG00000283602	transcribed_unitary_pseudogene	43.4954	-1.16835	0.183015	-6.3839	1.73e-10	2.27e-09
ENSG00000113810	SMC4	protein_coding	324.615	1.24324	0.194947	6.37735	1.8e-10	2.37e-09
ENSG00000142166	IFNAR1	protein_coding	1675.03	-0.830692	0.130263	-6.37704	1.81e-10	2.38e-09
ENSG00000105221	AKT2	protein_coding	2367.79	0.896452	0.140577	6.37695	1.81e-10	2.38e-09
ENSG00000171984	SHLD1	protein_coding	221.638	1.7393	0.272808	6.37553	1.82e-10	2.4e-09
ENSG00000131724	IL13RA1	protein_coding	2078.44	-0.966299	0.151643	-6.37218	1.86e-10	2.45e-09
ENSG00000100385	IL2RB	protein_coding	986.509	-1.38183	0.217036	-6.36683	1.93e-10	2.54e-09
ENSG00000118200	CAMSAP2	protein_coding	35.3871	1.21278	0.19061	6.36261	1.98e-10	2.6e-09
ENSG00000184014	DENND5A	protein_coding	2524.02	-0.747189	0.117635	-6.35174	2.13e-10	2.79e-09
ENSG00000116678	LEPR	protein_coding	86.1647	1.47899	0.232881	6.35084	2.14e-10	2.81e-09
ENSG00000180573	H2AC6	protein_coding	1784.92	-0.771946	0.12156	-6.35032	2.15e-10	2.82e-09
ENSG00000257252	ENSG00000257252	lncRNA	9.67851	2.66863	0.420317	6.34909	2.17e-10	2.84e-09
ENSG00000137841	PLCB2	protein_coding	3191.08	-0.636275	0.100253	-6.34668	2.2e-10	2.88e-09
ENSG00000187735	TCEA1	protein_coding	837.596	0.796287	0.125477	6.34607	2.21e-10	2.89e-09
ENSG00000135919	SERPINE2	protein_coding	34.316	1.27228	0.200556	6.34375	2.24e-10	2.93e-09
ENSG00000224307	LINC02975	lncRNA	153.117	-1.19861	0.188951	-6.34349	2.25e-10	2.94e-09
ENSG00000101336	HCK	protein_coding	7509.5	-0.854538	0.134737	-6.34229	2.26e-10	2.96e-09
ENSG00000257878	ENSG00000257878	lncRNA	34.7144	-1.39166	0.219442	-6.34179	2.27e-10	2.97e-09
ENSG00000254750	CASP1P2	unprocessed_pseudogene	5.8976	-2.86778	0.452263	-6.34096	2.28e-10	2.98e-09
ENSG00000154646	TMPRSS15	protein_coding	1.84123	4.83196	0.762446	6.33745	2.34e-10	3.05e-09
ENSG00000115919	KYNU	protein_coding	204.472	-0.77306	0.122004	-6.33636	2.35e-10	3.07e-09
ENSG00000257267	ZNF271P	transcribed_unitary_pseudogene	255.096	0.702997	0.110957	6.33576	2.36e-10	3.08e-09
ENSG00000198106	ENSG00000198106	lncRNA	25.612	1.60038	0.252627	6.33495	2.37e-10	3.09e-09
ENSG00000275302	CCL4	protein_coding	192.765	-1.48838	0.235009	-6.33331	2.4e-10	3.12e-09
ENSG00000251546	IGKV1D-39	IG_V_gene	21.9665	-3.61067	0.570125	-6.33313	2.4e-10	3.12e-09
ENSG00000198682	PAPSS2	protein_coding	44.158	-1.02086	0.161231	-6.33162	2.43e-10	3.15e-09
ENSG00000182580	EPHB3	protein_coding	22.9643	1.9748	0.31196	6.3303	2.45e-10	3.18e-09
ENSG00000133816	MICAL2	protein_coding	4090.96	1.21678	0.192261	6.32881	2.47e-10	3.21e-09
ENSG00000110218	PANX1	protein_coding	61.9532	-0.943591	0.149106	-6.32832	2.48e-10	3.22e-09
ENSG00000136003	ISCU	protein_coding	1688.23	0.820398	0.129661	6.32727	2.5e-10	3.24e-09
ENSG00000179632	MAF1	protein_coding	4242.23	1.3468	0.212867	6.32696	2.5e-10	3.24e-09
ENSG00000132405	TBC1D14	protein_coding	470.552	-1.08344	0.171292	-6.32511	2.53e-10	3.28e-09
ENSG00000105699	LSR	protein_coding	56.2994	-1.22363	0.193457	-6.32506	2.53e-10	3.28e-09
ENSG00000180611	MB21D2	protein_coding	14.0065	-1.65694	0.261968	-6.32496	2.53e-10	3.28e-09
ENSG00000148841	ITPRIP	protein_coding	1108.24	-0.84371	0.133401	-6.32461	2.54e-10	3.28e-09
ENSG00000148484	RSU1	protein_coding	1299.64	0.763251	0.120681	6.32456	2.54e-10	3.28e-09
ENSG00000233609	RPL10P19	transcribed_processed_pseudogene	16.3386	-1.85006	0.292633	-6.32212	2.58e-10	3.33e-09
ENSG00000213231	TCL1B	protein_coding	4.39404	3.54232	0.560416	6.32088	2.6e-10	3.36e-09
ENSG00000137393	RNF144B	protein_coding	562.075	-0.971017	0.153646	-6.31983	2.62e-10	3.38e-09
ENSG00000233236	LINC02573	lncRNA	7.96032	3.85419	0.609909	6.3193	2.63e-10	3.39e-09
ENSG00000228716	DHFR	protein_coding	208.391	1.07148	0.169566	6.31896	2.63e-10	3.4e-09
ENSG00000067646	ZFY	protein_coding	30.3142	7.89819	1.25002	6.31843	2.64e-10	3.41e-09
ENSG00000182957	SPATA13	protein_coding	856.063	-0.882957	0.139783	-6.31662	2.67e-10	3.44e-09
ENSG00000275393	ENSG00000275393	lncRNA	5.11827	2.58132	0.408812	6.31419	2.72e-10	3.49e-09
ENSG00000278918	ENSG00000278918	TEC	72.2982	-1.10769	0.17549	-6.31198	2.75e-10	3.54e-09
ENSG00000154845	PPP4R1	protein_coding	1073.48	-0.917049	0.145292	-6.31177	2.76e-10	3.55e-09
ENSG00000047644	WWC3	protein_coding	1046.46	-0.709427	0.112411	-6.31098	2.77e-10	3.56e-09
ENSG00000123374	CDK2	protein_coding	109.269	0.667602	0.105788	6.31074	2.78e-10	3.57e-09
ENSG00000166896	ATP23	protein_coding	31.7372	1.13884	0.180515	6.30887	2.81e-10	3.61e-09
ENSG00000149557	FEZ1	protein_coding	21.1225	-1.69194	0.268298	-6.30618	2.86e-10	3.67e-09
ENSG00000105610	KLF1	protein_coding	1306.16	1.82735	0.289785	6.30588	2.87e-10	3.67e-09
ENSG00000097033	SH3GLB1	protein_coding	1868.01	-0.73551	0.116669	-6.30425	2.9e-10	3.71e-09
ENSG00000285884	ENSG00000285884	lncRNA	9.26353	1.9212	0.304764	6.3039	2.9e-10	3.72e-09
ENSG00000290933	ENSG00000290933	lncRNA	13.4352	-2.85876	0.453655	-6.30161	2.95e-10	3.77e-09
ENSG00000107521	HPS1	protein_coding	889.976	1.10129	0.174815	6.29971	2.98e-10	3.82e-09
ENSG00000146094	DOK3	protein_coding	3310.72	-1.09619	0.174081	-6.29702	3.03e-10	3.88e-09
ENSG00000149418	ST14	protein_coding	205.767	-1.38412	0.219889	-6.29463	3.08e-10	3.94e-09
ENSG00000168502	MTCL1	protein_coding	10.9724	1.97838	0.314339	6.2938	3.1e-10	3.96e-09
ENSG00000188559	RALGAPA2	protein_coding	664.861	-0.75834	0.120522	-6.29212	3.13e-10	4e-09
ENSG00000163635	ATXN7	protein_coding	598.25	-0.951591	0.151242	-6.29186	3.14e-10	4e-09
ENSG00000131495	NDUFA2	protein_coding	465.706	0.860446	0.136789	6.29031	3.17e-10	4.04e-09
ENSG00000178789	CD300LB	protein_coding	601.876	-0.770989	0.122624	-6.2874	3.23e-10	4.12e-09
ENSG00000176533	GNG7	protein_coding	278.273	0.999929	0.159055	6.28668	3.24e-10	4.13e-09
ENSG00000092036	HAUS4	protein_coding	264.72	-0.776088	0.123463	-6.28598	3.26e-10	4.15e-09
ENSG00000259448	LINC02352	lncRNA	130.329	1.00744	0.160272	6.28582	3.26e-10	4.15e-09
ENSG00000095739	BAMBI	protein_coding	15.027	1.89473	0.301592	6.28242	3.33e-10	4.24e-09
ENSG00000185432	METTL7A	protein_coding	785.871	0.887284	0.141297	6.27955	3.4e-10	4.32e-09
ENSG00000136478	TEX2	protein_coding	208.474	0.681468	0.1086	6.27504	3.5e-10	4.44e-09
ENSG00000110046	ATG2A	protein_coding	729.491	-0.990931	0.158011	-6.27128	3.58e-10	4.55e-09
ENSG00000155659	VSIG4	protein_coding	42.0025	-1.64052	0.261596	-6.2712	3.58e-10	4.55e-09
ENSG00000112339	HBS1L	protein_coding	303.882	0.718924	0.114706	6.26751	3.67e-10	4.65e-09
ENSG00000100664	EIF5	protein_coding	2014.06	0.923984	0.147439	6.2669	3.68e-10	4.67e-09
ENSG00000137309	HMGA1	protein_coding	958.391	0.930531	0.148576	6.263	3.78e-10	4.79e-09
ENSG00000183963	SMTN	protein_coding	43.7034	1.09534	0.174923	6.26184	3.8e-10	4.82e-09
ENSG00000102710	SUPT20H	protein_coding	386.171	-0.613711	0.0980162	-6.26133	3.82e-10	4.83e-09
ENSG00000089169	RPH3A	protein_coding	105.133	-2.49505	0.398567	-6.26006	3.85e-10	4.87e-09
ENSG00000280734	LINC01232	lncRNA	65.1684	-1.04596	0.167113	-6.25903	3.87e-10	4.9e-09
ENSG00000112984	KIF20A	protein_coding	19.2386	1.90439	0.304294	6.25837	3.89e-10	4.92e-09
ENSG00000156535	CD109	protein_coding	21.5304	1.74082	0.278159	6.25837	3.89e-10	4.92e-09
ENSG00000224429	LINC00539	lncRNA	27.6102	1.23628	0.197558	6.25784	3.9e-10	4.93e-09
ENSG00000264304	ENSG00000264304	lncRNA	47.7125	-1.11748	0.178608	-6.25663	3.93e-10	4.97e-09
ENSG00000253842	ENSG00000253842	lncRNA	2.95539	3.8283	0.612028	6.25509	3.97e-10	5.01e-09
ENSG00000115904	SOS1	protein_coding	466.034	-0.714759	0.11427	-6.25499	3.98e-10	5.01e-09
ENSG00000100104	SRRD	protein_coding	485.974	1.09702	0.175434	6.25317	4.02e-10	5.07e-09
ENSG00000181690	PLAG1	protein_coding	63.6712	1.53488	0.245642	6.24845	4.15e-10	5.22e-09
ENSG00000103642	LACTB	protein_coding	382.398	-0.6476	0.103653	-6.24778	4.16e-10	5.24e-09
ENSG00000148572	NRBF2	protein_coding	1050.91	-0.813401	0.130199	-6.24739	4.17e-10	5.25e-09
[truncated: 4,727 more rows]

## Sheet: Table S7
Table S7. Differentially expressed genes (DEGs) in cord blood compared with maternal venous blood (C vs M) in HUU group
Ensembl	Symbol	Type	baseMean	log2FoldChange	lfcSE	stat	pvalue	padj
ENSG00000149516	MS4A3	protein_coding	482.202	4.77126	0.360132	13.2487	4.59e-40	9.05e-36
ENSG00000164821	DEFA4	protein_coding	833.403	5.89602	0.540027	10.918	9.45e-28	9.32e-24
ENSG00000005381	MPO	protein_coding	1342.64	5.61639	0.520146	10.7977	3.53e-27	2.32e-23
ENSG00000197561	ELANE	protein_coding	610.361	6.07387	0.567512	10.7026	9.89e-27	4.87e-23
ENSG00000196415	PRTN3	protein_coding	476.589	7.52579	0.707967	10.6302	2.16e-26	7.62e-23
ENSG00000110090	CPT1A	protein_coding	399.578	-2.47758	0.233218	-10.6234	2.32e-26	7.62e-23
ENSG00000136929	HEMGN	protein_coding	3099.09	4.71765	0.462175	10.2075	1.84e-24	4.52e-21
ENSG00000205726	ITSN1	protein_coding	277.296	2.81821	0.276094	10.2075	1.84e-24	4.52e-21
ENSG00000167244	IGF2	protein_coding	542.736	7.55293	0.74249	10.1724	2.63e-24	5.76e-21
ENSG00000239920	ENSG00000239920	protein_coding	130.831	6.33729	0.647245	9.79118	1.23e-22	2.42e-19
ENSG00000072163	LIMS2	protein_coding	153.971	3.32107	0.3437	9.6627	4.34e-22	7.78e-19
ENSG00000135114	OASL	protein_coding	311.397	-2.88675	0.300785	-9.59738	8.2e-22	1.35e-18
ENSG00000100448	CTSG	protein_coding	507.492	6.54207	0.688407	9.50319	2.04e-21	3.09e-18
ENSG00000236320	SLFN14	protein_coding	367.917	3.8071	0.401207	9.48911	2.33e-21	3.28e-18
ENSG00000172232	AZU1	protein_coding	442.371	5.46082	0.581318	9.39386	5.78e-21	7.6e-18
ENSG00000066926	FECH	protein_coding	4513.91	3.9496	0.422332	9.35188	8.61e-21	1.06e-17
ENSG00000065618	COL17A1	protein_coding	104.818	4.06908	0.441938	9.20735	3.34e-20	3.87e-17
ENSG00000179869	ABCA13	protein_coding	97.7181	4.22159	0.460483	9.16774	4.83e-20	5.29e-17
ENSG00000164176	EDIL3	protein_coding	165.027	7.14791	0.782388	9.13602	6.48e-20	6.72e-17
ENSG00000170180	GYPA	protein_coding	599.856	5.6435	0.626059	9.01434	1.98e-19	1.95e-16
ENSG00000086548	CEACAM6	protein_coding	378.949	4.85012	0.542007	8.94846	3.6e-19	3.38e-16
ENSG00000102837	OLFM4	protein_coding	1659.55	4.36348	0.488357	8.93502	4.07e-19	3.65e-16
ENSG00000173391	OLR1	protein_coding	143.211	3.8727	0.434741	8.90807	5.19e-19	4.45e-16
ENSG00000157554	ERG	protein_coding	50.7528	4.12615	0.464786	8.87752	6.84e-19	5.61e-16
ENSG00000239839	DEFA3	protein_coding	11951.4	5.84191	0.662797	8.81402	1.21e-18	9.52e-16
ENSG00000282024	ENSG00000282024	lncRNA	65.8863	4.50943	0.517609	8.71204	2.98e-18	2.26e-15
ENSG00000124469	CEACAM8	protein_coding	636.626	4.34056	0.504059	8.61121	7.23e-18	5.28e-15
ENSG00000187997	C17orf99	protein_coding	216.951	4.62849	0.543832	8.51088	1.73e-17	1.21e-14
ENSG00000064886	CHI3L2	protein_coding	342.161	2.64973	0.313731	8.44588	3.02e-17	2.05e-14
ENSG00000266412	NCOA4	protein_coding	36395.9	2.73711	0.325098	8.41934	3.79e-17	2.49e-14
ENSG00000181704	YIPF6	protein_coding	883.025	2.20909	0.266063	8.30286	1.02e-16	6.46e-14
ENSG00000104765	BNIP3L	protein_coding	17955.9	3.23316	0.39016	8.28676	1.16e-16	7.17e-14
ENSG00000117632	STMN1	protein_coding	632.294	2.44647	0.299386	8.17162	3.04e-16	1.82e-13
ENSG00000152484	USP12	protein_coding	2755.48	3.41417	0.422029	8.0899	5.97e-16	3.46e-13
ENSG00000204010	IFIT1B	protein_coding	7370.45	5.14778	0.640579	8.03613	9.27e-16	5.22e-13
ENSG00000096006	CRISP3	protein_coding	474.942	3.59041	0.450863	7.96342	1.67e-15	9.16e-13
ENSG00000164649	CDCA7L	protein_coding	219.251	1.86201	0.236921	7.85922	3.87e-15	2.03e-12
ENSG00000133069	TMCC2	protein_coding	5214.85	3.99493	0.508413	7.85766	3.91e-15	2.03e-12
ENSG00000223629	DEFA8P	unprocessed_pseudogene	53.2611	9.02617	1.15091	7.8426	4.41e-15	2.23e-12
ENSG00000225783	MIAT	lncRNA	671.743	-2.84884	0.36449	-7.81597	5.45e-15	2.69e-12
ENSG00000180667	YOD1	protein_coding	1818.99	3.00391	0.384809	7.80624	5.89e-15	2.83e-12
ENSG00000118113	MMP8	protein_coding	1172.78	3.8731	0.496824	7.79572	6.4e-15	2.96e-12
ENSG00000160791	CCR5	protein_coding	277.7	-2.97539	0.381717	-7.79475	6.45e-15	2.96e-12
ENSG00000007968	E2F2	protein_coding	1437.43	3.2906	0.423953	7.7617	8.38e-15	3.75e-12
ENSG00000154114	TBCEL	protein_coding	672.097	3.20729	0.418173	7.66978	1.72e-14	7.55e-12
ENSG00000198836	OPA1	protein_coding	1134.1	2.23819	0.292348	7.65593	1.92e-14	8.22e-12
ENSG00000103257	SLC7A5	protein_coding	1429.63	3.23894	0.425317	7.61537	2.63e-14	1.1e-11
ENSG00000250361	GYPB	protein_coding	2085.48	4.93754	0.648663	7.61187	2.7e-14	1.11e-11
ENSG00000221826	PSG3	protein_coding	179.586	25.1078	3.3837	7.42024	1.17e-13	4.7e-11
ENSG00000011426	ANLN	protein_coding	41.4699	3.4831	0.471454	7.38799	1.49e-13	5.88e-11
ENSG00000130227	XPO7	protein_coding	3107.04	2.84148	0.385081	7.37891	1.6e-13	6.08e-11
ENSG00000011028	MRC2	protein_coding	1014.53	3.04741	0.413022	7.37831	1.6e-13	6.08e-11
ENSG00000111726	CMAS	protein_coding	572.541	2.06002	0.279893	7.36004	1.84e-13	6.84e-11
ENSG00000173894	CBX2	protein_coding	38.3073	4.13838	0.566478	7.30546	2.76e-13	1.01e-10
ENSG00000283646	LINC02009	lncRNA	71.448	3.22394	0.441943	7.29493	2.99e-13	1.07e-10
ENSG00000013561	RNF14	protein_coding	871.578	2.35166	0.323167	7.27691	3.42e-13	1.2e-10
ENSG00000154451	GBP5	protein_coding	1272.2	-2.28374	0.314552	-7.26028	3.86e-13	1.33e-10
ENSG00000196549	MME	protein_coding	1886.95	-3.15563	0.434778	-7.25804	3.93e-13	1.33e-10
ENSG00000152078	TLCD4	protein_coding	496.281	4.22127	0.583193	7.23819	4.55e-13	1.52e-10
ENSG00000188672	RHCE	protein_coding	233.733	3.94129	0.544872	7.23343	4.71e-13	1.55e-10
ENSG00000287632	ENSG00000287632	lncRNA	91.634	3.258	0.452615	7.19818	6.1e-13	1.97e-10
ENSG00000206047	DEFA1	protein_coding	26.5738	6.29865	0.880712	7.15177	8.57e-13	2.72e-10
ENSG00000137460	FHDC1	protein_coding	188.609	2.6015	0.36433	7.1405	9.3e-13	2.91e-10
ENSG00000100234	TIMP3	protein_coding	27.8094	5.29576	0.742533	7.13203	9.89e-13	3.05e-10
ENSG00000172331	BPGM	protein_coding	13637.9	4.1247	0.579513	7.11752	1.1e-12	3.33e-10
ENSG00000156298	TSPAN7	protein_coding	256.385	4.74478	0.669088	7.09142	1.33e-12	3.96e-10
ENSG00000136231	IGF2BP3	protein_coding	56.0616	3.84816	0.542996	7.0869	1.37e-12	4.03e-10
ENSG00000101425	BPI	protein_coding	1145.67	4.52753	0.643643	7.03422	2e-12	5.81e-10
ENSG00000109956	B3GAT1	protein_coding	67.9715	-4.05134	0.576909	-7.0225	2.18e-12	6.22e-10
ENSG00000142583	SLC2A5	protein_coding	113.16	3.33724	0.47576	7.01454	2.31e-12	6.49e-10
ENSG00000123485	HJURP	protein_coding	49.9197	3.98249	0.57049	6.98081	2.93e-12	8.15e-10
ENSG00000148346	LCN2	protein_coding	2144.89	4.24191	0.607833	6.97874	2.98e-12	8.15e-10
ENSG00000186591	UBE2H	protein_coding	4527.19	2.0839	0.299295	6.96268	3.34e-12	9.01e-10
ENSG00000254006	ENSG00000254006	lncRNA	26.455	5.10179	0.734441	6.9465	3.74e-12	9.97e-10
ENSG00000155380	SLC16A1	protein_coding	184.345	2.19846	0.317477	6.92477	4.37e-12	1.13e-09
ENSG00000153574	RPIA	protein_coding	1428.47	2.25146	0.325142	6.92453	4.37e-12	1.13e-09
ENSG00000136542	GALNT5	protein_coding	72.3843	4.14514	0.601048	6.89652	5.33e-12	1.36e-09
ENSG00000131153	GINS2	protein_coding	35.5347	3.49637	0.507827	6.88497	5.78e-12	1.46e-09
ENSG00000122644	ARL4A	protein_coding	684	3.30972	0.481725	6.87056	6.4e-12	1.6e-09
ENSG00000163554	SPTA1	protein_coding	523.537	4.21943	0.615741	6.85259	7.25e-12	1.79e-09
ENSG00000171914	TLN2	protein_coding	43.6093	3.37613	0.49621	6.80385	1.02e-11	2.48e-09
ENSG00000012223	LTF	protein_coding	7165.3	4.65772	0.685432	6.79531	1.08e-11	2.6e-09
ENSG00000178538	CA8	protein_coding	59.0428	4.58853	0.677435	6.77339	1.26e-11	2.99e-09
ENSG00000111339	ART4	protein_coding	31.741	4.98973	0.737451	6.76618	1.32e-11	3.1e-09
ENSG00000122952	ZWINT	protein_coding	55.352	3.06264	0.45327	6.75677	1.41e-11	3.27e-09
ENSG00000042062	RIPOR3	protein_coding	211.167	3.26858	0.485675	6.72998	1.7e-11	3.89e-09
ENSG00000170312	CDK1	protein_coding	49.9907	3.60797	0.536918	6.71978	1.82e-11	4.12e-09
ENSG00000145354	CISD2	protein_coding	1211.32	2.9177	0.43496	6.70798	1.97e-11	4.42e-09
ENSG00000143476	DTL	protein_coding	25.5488	3.36864	0.504524	6.67687	2.44e-11	5.41e-09
ENSG00000260629	BGLT3	lncRNA	14.5664	7.88052	1.18112	6.67211	2.52e-11	5.52e-09
ENSG00000088826	SMOX	protein_coding	2803.32	3.61249	0.543803	6.643	3.07e-11	6.61e-09
ENSG00000155962	CLIC2	protein_coding	236.527	2.92886	0.440934	6.64241	3.09e-11	6.61e-09
ENSG00000124256	ZBP1	protein_coding	372.657	-1.87956	0.283797	-6.62291	3.52e-11	7.39e-09
ENSG00000116675	DNAJC6	protein_coding	209.904	3.91733	0.591501	6.62269	3.53e-11	7.39e-09
ENSG00000272398	CD24	protein_coding	1060.51	2.66936	0.403832	6.61006	3.84e-11	7.97e-09
ENSG00000173114	LRRN3	protein_coding	595.027	3.53467	0.535962	6.59501	4.25e-11	8.73e-09
ENSG00000166171	DPCD	protein_coding	391.756	3.24775	0.493305	6.58365	4.59e-11	9.33e-09
ENSG00000146007	ZMAT2	protein_coding	4666.57	1.65047	0.25092	6.57767	4.78e-11	9.61e-09
ENSG00000164010	ERMAP	protein_coding	393.668	1.87581	0.286121	6.55602	5.53e-11	1.1e-08
ENSG00000167513	CDT1	protein_coding	60.0378	3.55908	0.543149	6.55268	5.65e-11	1.11e-08
ENSG00000126088	UROD	protein_coding	1453.02	2.76988	0.42428	6.52842	6.65e-11	1.3e-08
ENSG00000167815	PRDX2	protein_coding	4625.88	3.34396	0.514067	6.5049	7.77e-11	1.5e-08
ENSG00000110693	SOX6	protein_coding	236.252	3.90347	0.600612	6.49917	8.08e-11	1.55e-08
ENSG00000175931	UBE2O	protein_coding	1419.97	2.62776	0.404491	6.49647	8.22e-11	1.56e-08
ENSG00000122641	INHBA	protein_coding	30.1774	4.87275	0.751627	6.48294	9e-11	1.69e-08
ENSG00000171848	RRM2	protein_coding	161.773	2.59971	0.401268	6.47874	9.25e-11	1.72e-08
ENSG00000167768	KRT1	protein_coding	5608.98	3.80002	0.587235	6.47104	9.73e-11	1.79e-08
ENSG00000163568	AIM2	protein_coding	227.331	-3.2445	0.50271	-6.45401	1.09e-10	1.99e-08
ENSG00000169877	AHSP	protein_coding	8897.36	3.83608	0.596171	6.43454	1.24e-10	2.24e-08
ENSG00000256269	HMBS	protein_coding	1920.61	3.27872	0.511122	6.41474	1.41e-10	2.53e-08
ENSG00000104738	MCM4	protein_coding	171.525	2.11825	0.331396	6.39189	1.64e-10	2.91e-08
ENSG00000196132	MYT1	protein_coding	33.5496	7.05053	1.10479	6.38179	1.75e-10	3.08e-08
ENSG00000171984	SHLD1	protein_coding	215.295	1.97391	0.309661	6.37443	1.84e-10	3.2e-08
ENSG00000165507	DEPP1	protein_coding	184.586	5.69179	0.893568	6.36973	1.89e-10	3.27e-08
ENSG00000246705	H2AJ	protein_coding	795.294	1.93195	0.303715	6.36107	2e-10	3.43e-08
ENSG00000073111	MCM2	protein_coding	94.1558	2.21938	0.348959	6.36	2.02e-10	3.43e-08
ENSG00000132718	SYT11	protein_coding	195.612	-1.66186	0.261514	-6.35477	2.09e-10	3.52e-08
ENSG00000123091	RNF11	protein_coding	4497.11	2.67914	0.421961	6.34926	2.16e-10	3.61e-08
ENSG00000240065	PSMB9	protein_coding	1509.83	-1.28692	0.202912	-6.34227	2.26e-10	3.75e-08
ENSG00000034713	GABARAPL2	protein_coding	4089.77	2.07499	0.327383	6.33813	2.33e-10	3.82e-08
ENSG00000117724	CENPF	protein_coding	74.7153	3.07629	0.485548	6.3357	2.36e-10	3.85e-08
ENSG00000142168	SOD1	protein_coding	1433.48	1.9833	0.313206	6.33224	2.42e-10	3.9e-08
ENSG00000287860	ENSG00000287860	lncRNA	55.5828	3.1093	0.491975	6.32005	2.61e-10	4.19e-08
ENSG00000132185	FCRLA	protein_coding	200.094	1.43957	0.228174	6.30909	2.81e-10	4.46e-08
ENSG00000185198	PRSS57	protein_coding	59.0917	4.08662	0.649143	6.29541	3.07e-10	4.83e-08
ENSG00000272168	CASC15	lncRNA	26.152	3.11991	0.49628	6.28659	3.25e-10	5.08e-08
ENSG00000197465	GYPE	protein_coding	81.9294	3.63725	0.579086	6.28102	3.36e-10	5.22e-08
ENSG00000214517	PPME1	protein_coding	388.446	1.96367	0.312845	6.27683	3.46e-10	5.32e-08
ENSG00000286055	ENSG00000286055	lncRNA	50.3586	4.09918	0.653212	6.27543	3.49e-10	5.33e-08
ENSG00000114948	ADAM23	protein_coding	35.1644	3.65788	0.585119	6.25152	4.06e-10	6.16e-08
ENSG00000144648	ACKR2	protein_coding	31.083	4.10592	0.657194	6.24765	4.17e-10	6.27e-08
ENSG00000161888	SPC24	protein_coding	32.0065	3.35336	0.537723	6.23623	4.48e-10	6.69e-08
ENSG00000130300	PLVAP	protein_coding	320.283	2.59851	0.41679	6.23459	4.53e-10	6.71e-08
ENSG00000113389	NPR3	protein_coding	20.7143	5.11008	0.821817	6.21802	5.03e-10	7.4e-08
ENSG00000158966	CACHD1	protein_coding	35.622	2.84164	0.457079	6.21696	5.07e-10	7.4e-08
ENSG00000166848	TERF2IP	protein_coding	2748.86	2.02678	0.327212	6.19408	5.86e-10	8.48e-08
ENSG00000137210	TMEM14B	protein_coding	459.321	1.85069	0.298829	6.19316	5.9e-10	8.48e-08
ENSG00000119917	IFIT3	protein_coding	1049.67	-2.36124	0.382022	-6.18091	6.37e-10	9.1e-08
ENSG00000165661	QSOX2	protein_coding	274.724	1.53663	0.249638	6.15543	7.49e-10	1.06e-07
ENSG00000233056	ERVH48-1	protein_coding	87.65	5.63303	0.915667	6.15183	7.66e-10	1.08e-07
ENSG00000182518	FAM104B	protein_coding	177.258	1.81077	0.294758	6.14324	8.09e-10	1.13e-07
ENSG00000155966	AFF2	protein_coding	50.8977	3.19886	0.520782	6.14242	8.13e-10	1.13e-07
ENSG00000173926	MARCHF3	protein_coding	207.098	2.31197	0.37703	6.13206	8.68e-10	1.2e-07
ENSG00000106771	TMEM245	protein_coding	601.123	1.6454	0.269445	6.10662	1.02e-09	1.39e-07
ENSG00000184292	TACSTD2	protein_coding	41.3965	3.41631	0.560444	6.09573	1.09e-09	1.48e-07
ENSG00000133606	MKRN1	protein_coding	20166.4	2.33245	0.382956	6.09064	1.12e-09	1.52e-07
ENSG00000143479	DYRK3	protein_coding	177.991	3.08441	0.507405	6.07878	1.21e-09	1.62e-07
ENSG00000133488	SEC14L4	protein_coding	58.4069	2.82138	0.464482	6.07426	1.25e-09	1.66e-07
ENSG00000090013	BLVRB	protein_coding	12091.7	2.61819	0.431295	6.07053	1.27e-09	1.69e-07
ENSG00000143333	RGS16	protein_coding	51.1921	3.54307	0.584086	6.066	1.31e-09	1.72e-07
ENSG00000183508	TENT5C	protein_coding	16511.2	3.43367	0.567014	6.0557	1.4e-09	1.82e-07
ENSG00000186185	KIF18B	protein_coding	25.8437	4.25921	0.703422	6.05499	1.4e-09	1.82e-07
ENSG00000118777	ABCG2	protein_coding	294.378	3.64044	0.603736	6.02986	1.64e-09	2.11e-07
ENSG00000164692	COL1A2	protein_coding	25.6742	6.17142	1.02403	6.02658	1.67e-09	2.14e-07
ENSG00000271503	CCL5	protein_coding	3759.85	-2.02449	0.336227	-6.0212	1.73e-09	2.2e-07
ENSG00000205683	DPF3	protein_coding	26.4037	2.97786	0.494898	6.01711	1.78e-09	2.24e-07
ENSG00000110987	BCL7A	protein_coding	98.8135	1.59922	0.265843	6.01565	1.79e-09	2.25e-07
ENSG00000173801	JUP	protein_coding	195.275	2.29243	0.381348	6.01137	1.84e-09	2.29e-07
ENSG00000127328	RAB3IP	protein_coding	253.218	2.0288	0.337787	6.00615	1.9e-09	2.35e-07
ENSG00000181873	IBA57	protein_coding	537.038	3.29152	0.549421	5.9909	2.09e-09	2.57e-07
ENSG00000166803	PCLAF	protein_coding	28.0103	3.40879	0.570066	5.97964	2.24e-09	2.74e-07
ENSG00000159023	EPB41	protein_coding	7252.49	2.11016	0.354077	5.9596	2.53e-09	3.08e-07
ENSG00000117394	SLC2A1	protein_coding	1957.02	2.02393	0.339786	5.95648	2.58e-09	3.12e-07
ENSG00000112146	FBXO9	protein_coding	3439.18	1.76946	0.297336	5.95106	2.66e-09	3.2e-07
ENSG00000162337	LRP5	protein_coding	29.5965	2.43766	0.4098	5.94842	2.71e-09	3.23e-07
ENSG00000127955	GNAI1	protein_coding	35.0358	2.67298	0.450155	5.93792	2.89e-09	3.43e-07
ENSG00000106327	TFR2	protein_coding	372.182	3.09828	0.522078	5.93451	2.95e-09	3.48e-07
ENSG00000134827	TCN1	protein_coding	624.384	3.31473	0.559307	5.92649	3.09e-09	3.63e-07
ENSG00000111665	CDCA3	protein_coding	21.1874	3.3983	0.574707	5.91311	3.36e-09	3.91e-07
ENSG00000253982	CLN8-AS1	lncRNA	1149.98	2.26818	0.383759	5.91042	3.41e-09	3.96e-07
ENSG00000145335	SNCA	protein_coding	17747.1	2.8715	0.485946	5.90908	3.44e-09	3.96e-07
ENSG00000112077	RHAG	protein_coding	299.271	4.21563	0.714458	5.90046	3.62e-09	4.15e-07
ENSG00000271736	LINC02772	lncRNA	491.585	3.19368	0.54292	5.88242	4.04e-09	4.61e-07
ENSG00000166793	YPEL4	protein_coding	273.855	3.26739	0.555626	5.88056	4.09e-09	4.61e-07
ENSG00000157456	CCNB2	protein_coding	55.8362	3.35218	0.570077	5.88022	4.1e-09	4.61e-07
ENSG00000101782	RIOK3	protein_coding	6238.46	2.33617	0.397343	5.87947	4.12e-09	4.61e-07
ENSG00000065491	TBC1D22B	protein_coding	465.64	1.64588	0.280441	5.86889	4.39e-09	4.88e-07
ENSG00000132698	RAB25	protein_coding	32.7721	4.73525	0.807134	5.86674	4.44e-09	4.92e-07
ENSG00000288700	ENSG00000288700	lncRNA	60.0228	-2.038	0.347453	-5.86553	4.48e-09	4.93e-07
ENSG00000176890	TYMS	protein_coding	48.2745	2.90898	0.496571	5.85815	4.68e-09	5.12e-07
ENSG00000179914	ITLN1	protein_coding	280.733	3.32203	0.569486	5.83339	5.43e-09	5.91e-07
ENSG00000173848	NET1	protein_coding	221.75	3.03545	0.520884	5.82749	5.63e-09	6.09e-07
ENSG00000100387	RBX1	protein_coding	1121.6	2.20915	0.381428	5.79179	6.96e-09	7.46e-07
ENSG00000172671	ZFAND4	protein_coding	170.483	1.59339	0.275113	5.79177	6.96e-09	7.46e-07
ENSG00000115363	EVA1A	protein_coding	19.8589	6.3241	1.09223	5.79006	7.04e-09	7.5e-07
ENSG00000076043	REXO2	protein_coding	552.572	2.37618	0.410582	5.78735	7.15e-09	7.58e-07
ENSG00000133193	FAM104A	protein_coding	1383.15	1.81234	0.313443	5.78203	7.38e-09	7.78e-07
ENSG00000129472	RAB2B	protein_coding	1839.85	3.05469	0.530613	5.75691	8.57e-09	8.98e-07
ENSG00000001084	GCLC	protein_coding	484.662	2.03345	0.354694	5.73297	9.87e-09	1.03e-06
ENSG00000089685	BIRC5	protein_coding	74.1864	3.01488	0.525919	5.73259	9.89e-09	1.03e-06
ENSG00000130513	GDF15	protein_coding	118.787	4.57003	0.801048	5.70506	1.16e-08	1.2e-06
ENSG00000163536	SERPINI1	protein_coding	73.6234	2.65426	0.466405	5.69091	1.26e-08	1.3e-06
ENSG00000057757	PITHD1	protein_coding	1897.26	2.32694	0.409791	5.67834	1.36e-08	1.39e-06
ENSG00000115993	TRAK2	protein_coding	1612.67	1.97383	0.347884	5.67382	1.4e-08	1.42e-06
ENSG00000107242	PIP5K1B	protein_coding	214.029	1.68338	0.297144	5.66522	1.47e-08	1.48e-06
ENSG00000103342	GSPT1	protein_coding	9176.49	2.25608	0.398364	5.66338	1.48e-08	1.49e-06
ENSG00000160117	ANKLE1	protein_coding	80.4349	2.73705	0.484769	5.6461	1.64e-08	1.64e-06
ENSG00000004846	ABCB5	protein_coding	13.3355	5.74354	1.01738	5.64542	1.65e-08	1.64e-06
ENSG00000198805	PNP	protein_coding	2264.23	2.13413	0.378054	5.64504	1.65e-08	1.64e-06
ENSG00000166510	CCDC68	protein_coding	15.5241	5.52666	0.982484	5.62519	1.85e-08	1.83e-06
ENSG00000088325	TPX2	protein_coding	112.8	2.97957	0.530906	5.61224	2e-08	1.96e-06
ENSG00000284931	ENSG00000284931	protein_coding	30278.2	7.07395	1.26288	5.60143	2.13e-08	2.07e-06
ENSG00000276085	CCL3L1	protein_coding	104.749	-2.11696	0.378093	-5.59904	2.16e-08	2.09e-06
ENSG00000178537	SLC25A20	protein_coding	277.444	-1.38895	0.248087	-5.59864	2.16e-08	2.09e-06
ENSG00000187010	RHD	protein_coding	685.013	2.01937	0.360977	5.59419	2.22e-08	2.13e-06
ENSG00000273328	ENSG00000273328	lncRNA	11.9231	7.58491	1.36007	5.57687	2.45e-08	2.34e-06
ENSG00000173598	NUDT4	protein_coding	1478.62	1.8752	0.33632	5.57563	2.47e-08	2.35e-06
ENSG00000147180	ZNF711	protein_coding	24.6034	3.03542	0.544735	5.57229	2.51e-08	2.38e-06
ENSG00000135378	PRRG4	protein_coding	349.447	-2.27775	0.410278	-5.55173	2.83e-08	2.67e-06
ENSG00000100721	TCL1A	protein_coding	490.438	1.77895	0.320491	5.55069	2.85e-08	2.67e-06
ENSG00000177469	CAVIN1	protein_coding	58.2114	4.2791	0.772515	5.53918	3.04e-08	2.84e-06
ENSG00000129951	PLPPR3	protein_coding	14.21	7.10436	1.28351	5.53512	3.11e-08	2.89e-06
ENSG00000142798	HSPG2	protein_coding	19.2994	2.77185	0.501448	5.52768	3.24e-08	3e-06
ENSG00000198959	TGM2	protein_coding	1625.64	3.94536	0.714476	5.52204	3.35e-08	3.09e-06
ENSG00000164047	CAMP	protein_coding	2444.66	3.27265	0.592858	5.52012	3.39e-08	3.11e-06
ENSG00000118257	NRP2	protein_coding	20.2932	2.77368	0.502716	5.51739	3.44e-08	3.14e-06
ENSG00000115758	ODC1	protein_coding	1193.08	1.55859	0.282661	5.51399	3.51e-08	3.19e-06
ENSG00000118689	FOXO3	protein_coding	2927.03	2.02044	0.36654	5.51218	3.54e-08	3.2e-06
ENSG00000281501	SEPSECS-AS1	lncRNA	84.1812	2.21005	0.401456	5.5051	3.69e-08	3.31e-06
ENSG00000089692	LAG3	protein_coding	54.87	-3.04824	0.553784	-5.50438	3.7e-08	3.31e-06
ENSG00000117322	CR2	protein_coding	74.2582	1.79569	0.326238	5.50424	3.71e-08	3.31e-06
ENSG00000156575	PRG3	protein_coding	9.25758	6.50658	1.18329	5.49871	3.83e-08	3.4e-06
ENSG00000128050	PAICS	protein_coding	310.45	1.46879	0.267281	5.49529	3.9e-08	3.45e-06
ENSG00000142949	PTPRF	protein_coding	114.615	3.03048	0.551547	5.49451	3.92e-08	3.45e-06
ENSG00000131747	TOP2A	protein_coding	99.0896	2.45967	0.447926	5.49125	3.99e-08	3.5e-06
ENSG00000253483	ENSG00000253483	processed_pseudogene	20.7852	3.42126	0.623371	5.48833	4.06e-08	3.54e-06
ENSG00000169083	AR	protein_coding	14.8662	3.90072	0.71181	5.48001	4.25e-08	3.69e-06
ENSG00000179348	GATA2	protein_coding	75.0546	3.03111	0.553357	5.47767	4.31e-08	3.73e-06
ENSG00000135045	C9orf40	protein_coding	292.078	2.22678	0.407211	5.46837	4.54e-08	3.91e-06
ENSG00000068878	PSME4	protein_coding	1593.47	1.83732	0.336856	5.45431	4.92e-08	4.2e-06
ENSG00000129173	E2F8	protein_coding	11.4575	4.05719	0.743878	5.45411	4.92e-08	4.2e-06
ENSG00000169855	ROBO1	protein_coding	23.9835	2.75042	0.504413	5.45271	4.96e-08	4.21e-06
ENSG00000183111	ARHGEF37	protein_coding	219.199	2.90386	0.53289	5.44926	5.06e-08	4.26e-06
ENSG00000072274	TFRC	protein_coding	742.724	2.32742	0.427134	5.44891	5.07e-08	4.26e-06
ENSG00000215811	BTNL10P	transcribed_unitary_pseudogene	54.6693	2.87414	0.527529	5.4483	5.09e-08	4.26e-06
ENSG00000064270	ATP2C2	protein_coding	30.2703	3.35307	0.615948	5.44376	5.22e-08	4.36e-06
ENSG00000153898	MCOLN2	protein_coding	64.353	-2.53018	0.465505	-5.43534	5.47e-08	4.55e-06
ENSG00000267508	ZNF285	protein_coding	26.5289	2.88019	0.530933	5.42478	5.8e-08	4.8e-06
ENSG00000035499	DEPDC1B	protein_coding	61.9972	4.45938	0.823254	5.41677	6.07e-08	5e-06
ENSG00000101057	MYBL2	protein_coding	123.869	2.77309	0.512198	5.41409	6.16e-08	5.06e-06
ENSG00000198892	SHISA4	protein_coding	83.061	-3.33399	0.616072	-5.4117	6.24e-08	5.1e-06
ENSG00000128512	DOCK4	protein_coding	103.108	-2.18724	0.404378	-5.4089	6.34e-08	5.16e-06
ENSG00000291052	ABCC13	lncRNA	54.9918	3.70227	0.684968	5.40503	6.48e-08	5.26e-06
ENSG00000178694	NSUN3	protein_coding	503.552	1.73943	0.321865	5.40421	6.51e-08	5.26e-06
ENSG00000287839	ENSG00000287839	lncRNA	118.859	-1.4751	0.273057	-5.40216	6.58e-08	5.3e-06
ENSG00000165895	ARHGAP42	protein_coding	38.5803	3.66523	0.679003	5.39796	6.74e-08	5.4e-06
ENSG00000104918	RETN	protein_coding	781.06	3.02173	0.559898	5.39693	6.78e-08	5.41e-06
ENSG00000090889	KIF4A	protein_coding	30.939	3.28458	0.610073	5.38392	7.29e-08	5.79e-06
ENSG00000162738	VANGL2	protein_coding	6.88324	6.82329	1.26804	5.38095	7.41e-08	5.86e-06
ENSG00000088986	DYNLL1	protein_coding	1508.88	1.56728	0.291623	5.37433	7.69e-08	6.06e-06
ENSG00000119866	BCL11A	protein_coding	169.441	1.29393	0.241121	5.36631	8.04e-08	6.31e-06
ENSG00000092067	CEBPE	protein_coding	265.604	2.648	0.493772	5.36279	8.19e-08	6.41e-06
ENSG00000169607	CKAP2L	protein_coding	16.5053	3.26565	0.609281	5.35984	8.33e-08	6.49e-06
ENSG00000130600	H19	lncRNA	466.073	6.16453	1.15137	5.35409	8.6e-08	6.67e-06
ENSG00000162543	UBXN10	protein_coding	58.6768	2.44993	0.457743	5.35218	8.69e-08	6.69e-06
ENSG00000165434	PGM2L1	protein_coding	191.567	1.72391	0.322095	5.35217	8.69e-08	6.69e-06
ENSG00000198216	CACNA1E	protein_coding	136.398	-2.375	0.444315	-5.34531	9.03e-08	6.92e-06
ENSG00000168394	TAP1	protein_coding	1692.48	-1.39565	0.261628	-5.3345	9.58e-08	7.32e-06
ENSG00000119922	IFIT2	protein_coding	1534.23	-2.45635	0.460699	-5.3318	9.72e-08	7.4e-06
ENSG00000085831	TTC39A	protein_coding	81.4108	2.78128	0.522185	5.32623	1e-07	7.6e-06
ENSG00000163520	FBLN2	protein_coding	81.2584	3.90221	0.733059	5.32319	1.02e-07	7.7e-06
ENSG00000072571	HMMR	protein_coding	31.9275	3.47286	0.652479	5.32255	1.02e-07	7.7e-06
ENSG00000134057	CCNB1	protein_coding	69.3676	2.43265	0.457856	5.31313	1.08e-07	8.07e-06
ENSG00000117399	CDC20	protein_coding	56.9941	3.38365	0.637036	5.31155	1.09e-07	8.11e-06
ENSG00000198336	MYL4	protein_coding	5944.04	2.70265	0.508883	5.31094	1.09e-07	8.11e-06
ENSG00000100225	FBXO7	protein_coding	28097.4	1.92407	0.362406	5.30915	1.1e-07	8.16e-06
ENSG00000180089	TMEM86B	protein_coding	339.632	2.5748	0.486918	5.28796	1.24e-07	9.13e-06
ENSG00000165685	TMEM52B	protein_coding	16.7289	3.82763	0.724297	5.28462	1.26e-07	9.26e-06
ENSG00000198087	CD2AP	protein_coding	283.696	1.38885	0.262937	5.28206	1.28e-07	9.36e-06
ENSG00000057294	PKP2	protein_coding	30.5278	2.51788	0.477008	5.27848	1.3e-07	9.51e-06
ENSG00000165406	MARCHF8	protein_coding	9738.08	2.16989	0.411343	5.27514	1.33e-07	9.65e-06
ENSG00000121691	CAT	protein_coding	4645.66	1.54544	0.293394	5.26746	1.38e-07	1e-05
ENSG00000198554	WDHD1	protein_coding	45.7293	1.93142	0.366812	5.26542	1.4e-07	1.01e-05
ENSG00000148773	MKI67	protein_coding	147.344	2.92229	0.555847	5.25738	1.46e-07	1.05e-05
ENSG00000129932	DOHH	protein_coding	188.75	2.24567	0.427295	5.25555	1.48e-07	1.06e-05
ENSG00000213928	IRF9	protein_coding	162.076	-1.31582	0.250425	-5.25437	1.49e-07	1.06e-05
ENSG00000118513	MYB	protein_coding	93.244	2.10892	0.401414	5.25373	1.49e-07	1.06e-05
ENSG00000134986	NREP	protein_coding	24.8472	2.3521	0.447966	5.25063	1.52e-07	1.07e-05
ENSG00000137193	PIM1	protein_coding	6444.27	1.38189	0.263327	5.24779	1.54e-07	1.09e-05
ENSG00000229056	HECW2-AS1	lncRNA	24.8758	2.29277	0.437751	5.2376	1.63e-07	1.14e-05
ENSG00000248323	LUCAT1	lncRNA	660.643	-2.18878	0.418083	-5.23528	1.65e-07	1.16e-05
ENSG00000278195	SSTR3	protein_coding	202.169	2.19365	0.419196	5.233	1.67e-07	1.17e-05
ENSG00000117228	GBP1	protein_coding	612.981	-2.03492	0.389189	-5.22862	1.71e-07	1.19e-05
ENSG00000100479	POLE2	protein_coding	27.4028	2.41233	0.461685	5.22506	1.74e-07	1.21e-05
ENSG00000173868	PHOSPHO1	protein_coding	19544.9	2.22025	0.424998	5.22415	1.75e-07	1.21e-05
ENSG00000167986	DDB1	protein_coding	2154.98	1.72842	0.331061	5.22086	1.78e-07	1.23e-05
ENSG00000124225	PMEPA1	protein_coding	49.2764	1.84242	0.353183	5.21661	1.82e-07	1.25e-05
ENSG00000181036	FCRL6	protein_coding	224.285	-2.38689	0.457618	-5.2159	1.83e-07	1.25e-05
ENSG00000174059	CD34	protein_coding	36.7198	3.54181	0.679784	5.21019	1.89e-07	1.29e-05
ENSG00000135919	SERPINE2	protein_coding	29.8913	2.7581	0.529418	5.20968	1.89e-07	1.29e-05
ENSG00000144668	ITGA9	protein_coding	35.3471	3.42852	0.659301	5.20023	1.99e-07	1.34e-05
ENSG00000183597	TANGO2	protein_coding	1454.32	1.57206	0.302315	5.20007	1.99e-07	1.34e-05
ENSG00000170271	FAXDC2	protein_coding	1550.95	2.06105	0.397507	5.18495	2.16e-07	1.45e-05
ENSG00000026950	BTN3A1	protein_coding	1582.08	-1.40004	0.27018	-5.18188	2.2e-07	1.47e-05
ENSG00000196517	SLC6A9	protein_coding	322.861	2.91348	0.562616	5.17845	2.24e-07	1.49e-05
ENSG00000124813	RUNX2	protein_coding	200.31	-1.60668	0.310451	-5.17533	2.28e-07	1.51e-05
ENSG00000104131	EIF3J	protein_coding	538.468	1.17827	0.228383	5.15919	2.48e-07	1.65e-05
ENSG00000269887	ENSG00000269887	lncRNA	98.5693	3.03992	0.590083	5.15169	2.58e-07	1.71e-05
ENSG00000112212	TSPO2	protein_coding	173.192	3.15452	0.612628	5.14917	2.62e-07	1.72e-05
ENSG00000057657	PRDM1	protein_coding	298.911	-1.79486	0.348844	-5.14515	2.67e-07	1.76e-05
ENSG00000263465	SRSF8	protein_coding	1171.84	1.99574	0.388087	5.1425	2.71e-07	1.78e-05
ENSG00000110881	ASIC1	protein_coding	33.2078	3.00139	0.584534	5.13467	2.83e-07	1.84e-05
ENSG00000135476	ESPL1	protein_coding	23.8533	2.69313	0.524904	5.1307	2.89e-07	1.88e-05
ENSG00000162645	GBP2	protein_coding	4142.76	-1.58444	0.308954	-5.12839	2.92e-07	1.89e-05
ENSG00000121570	DPPA4	protein_coding	26.606	3.08441	0.60186	5.1248	2.98e-07	1.92e-05
ENSG00000170801	HTRA3	protein_coding	21.2317	4.20834	0.821733	5.12131	3.03e-07	1.95e-05
ENSG00000145386	CCNA2	protein_coding	55.823	2.38824	0.466953	5.11452	3.15e-07	2.02e-05
ENSG00000122966	CIT	protein_coding	27.4528	2.47738	0.484745	5.11069	3.21e-07	2.05e-05
ENSG00000054356	PTPRN	protein_coding	108.804	3.63033	0.710381	5.1104	3.21e-07	2.05e-05
ENSG00000134376	CRB1	protein_coding	11.5128	5.08075	0.995646	5.10297	3.34e-07	2.13e-05
ENSG00000170442	KRT86	protein_coding	18.0901	7.46318	1.46509	5.09399	3.51e-07	2.22e-05
ENSG00000162367	TAL1	protein_coding	1331.25	2.35853	0.463076	5.09319	3.52e-07	2.22e-05
ENSG00000285486	ENSG00000285486	lncRNA	14.8967	4.73788	0.930351	5.09257	3.53e-07	2.22e-05
ENSG00000126787	DLGAP5	protein_coding	60.5049	3.21842	0.632188	5.09093	3.56e-07	2.24e-05
ENSG00000119333	DYNC2I2	protein_coding	85.4778	2.15629	0.423719	5.08895	3.6e-07	2.25e-05
ENSG00000114126	TFDP2	protein_coding	698.905	2.32693	0.45749	5.08629	3.65e-07	2.28e-05
ENSG00000189221	MAOA	protein_coding	283.529	5.87819	1.15607	5.08462	3.68e-07	2.29e-05
ENSG00000128322	IGLL1	protein_coding	10.6612	5.37058	1.05692	5.08134	3.75e-07	2.32e-05
ENSG00000132646	PCNA	protein_coding	438.969	1.26514	0.249736	5.06592	4.06e-07	2.51e-05
ENSG00000182923	CEP63	protein_coding	387.097	-1.59834	0.315713	-5.06265	4.13e-07	2.55e-05
ENSG00000287642	ENSG00000287642	lncRNA	85.1902	2.45494	0.485203	5.05962	4.2e-07	2.58e-05
ENSG00000184661	CDCA2	protein_coding	19.9965	3.31112	0.655063	5.05466	4.31e-07	2.64e-05
ENSG00000237649	KIFC1	protein_coding	41.9182	2.68968	0.53262	5.04991	4.42e-07	2.7e-05
ENSG00000135070	ISCA1	protein_coding	1540.18	2.29668	0.454918	5.04856	4.45e-07	2.71e-05
ENSG00000136161	RCBTB2	protein_coding	522.643	-1.74326	0.345376	-5.04744	4.48e-07	2.72e-05
ENSG00000229474	PATL2	protein_coding	174.15	-2.12816	0.423123	-5.02964	4.91e-07	2.97e-05
ENSG00000095637	SORBS1	protein_coding	68.1666	3.54409	0.704804	5.02848	4.94e-07	2.97e-05
ENSG00000224616	RTCA-AS1	lncRNA	141.196	2.11374	0.420379	5.02817	4.95e-07	2.97e-05
ENSG00000248385	TARM1	protein_coding	36.8439	3.57844	0.711709	5.02795	4.96e-07	2.97e-05
ENSG00000198876	DCAF12	protein_coding	21329.4	2.25314	0.448299	5.02598	5.01e-07	2.99e-05
ENSG00000128335	APOL2	protein_coding	1063.21	-1.54126	0.306811	-5.02349	5.07e-07	3.02e-05
ENSG00000066279	ASPM	protein_coding	42.3053	3.07549	0.612248	5.02328	5.08e-07	3.02e-05
ENSG00000158163	DZIP1L	protein_coding	13.8582	2.8181	0.561449	5.01934	5.19e-07	3.07e-05
ENSG00000198719	DLL1	protein_coding	14.5886	2.82938	0.564358	5.01345	5.35e-07	3.15e-05
ENSG00000171552	BCL2L1	protein_coding	18895.8	2.54248	0.507212	5.01265	5.37e-07	3.16e-05
ENSG00000186642	PDE2A	protein_coding	56.667	2.61092	0.521387	5.00765	5.51e-07	3.23e-05
ENSG00000105610	KLF1	protein_coding	1528.91	2.50418	0.500292	5.00544	5.57e-07	3.26e-05
ENSG00000130560	UBAC1	protein_coding	721.457	1.43746	0.287428	5.00112	5.7e-07	3.32e-05
ENSG00000106484	MEST	protein_coding	50.7607	1.84609	0.369376	4.99785	5.8e-07	3.37e-05
ENSG00000166946	CCNDBP1	protein_coding	6201.8	1.78068	0.356602	4.99347	5.93e-07	3.44e-05
ENSG00000157240	FZD1	protein_coding	36.876	-2.21159	0.443171	-4.99037	6.03e-07	3.47e-05
ENSG00000197256	KANK2	protein_coding	307.915	2.30754	0.462409	4.99025	6.03e-07	3.47e-05
ENSG00000104723	TUSC3	protein_coding	26.6256	4.95823	0.994317	4.98656	6.15e-07	3.53e-05
ENSG00000140057	AK7	protein_coding	10.9539	5.03391	1.00961	4.98601	6.16e-07	3.53e-05
ENSG00000240247	DEFA1B	protein_coding	11.3359	6.82729	1.3708	4.98051	6.34e-07	3.62e-05
ENSG00000100554	ATP6V1D	protein_coding	1185.69	1.60343	0.321974	4.98001	6.36e-07	3.62e-05
ENSG00000128487	SPECC1	protein_coding	487.488	1.59292	0.319953	4.9786	6.4e-07	3.64e-05
ENSG00000102760	RGCC	protein_coding	928.037	2.44552	0.49188	4.97179	6.63e-07	3.76e-05
ENSG00000197312	DDI2	protein_coding	403.748	1.40245	0.282709	4.96076	7.02e-07	3.97e-05
ENSG00000121053	EPX	protein_coding	16.9455	3.41673	0.690796	4.94608	7.57e-07	4.26e-05
ENSG00000135924	DNAJB2	protein_coding	4401.48	1.94554	0.394908	4.92656	8.37e-07	4.7e-05
ENSG00000100342	APOL1	protein_coding	432.617	-1.64062	0.333484	-4.91963	8.67e-07	4.85e-05
ENSG00000146670	CDCA5	protein_coding	38.6078	2.82731	0.575976	4.90873	9.17e-07	5.12e-05
ENSG00000175449	RFESD	protein_coding	38.0253	2.82322	0.575301	4.90738	9.23e-07	5.12e-05
ENSG00000134627	PIWIL4	protein_coding	55.9972	1.85538	0.378099	4.90713	9.24e-07	5.12e-05
ENSG00000197182	MIRLET7BHG	lncRNA	23.7118	-3.06025	0.623655	-4.90696	9.25e-07	5.12e-05
ENSG00000151623	NR3C2	protein_coding	22.5239	-3.81522	0.778013	-4.9038	9.4e-07	5.18e-05
ENSG00000176293	ZNF135	protein_coding	17.2136	2.94555	0.600695	4.90357	9.41e-07	5.18e-05
ENSG00000169902	TPST1	protein_coding	77.473	-3.16846	0.646948	-4.89756	9.7e-07	5.33e-05
ENSG00000123975	CKS2	protein_coding	71.9715	2.11028	0.431083	4.89529	9.82e-07	5.37e-05
ENSG00000167419	LPO	protein_coding	5.93734	6.59378	1.34994	4.88451	1.04e-06	5.66e-05
ENSG00000109805	NCAPG	protein_coding	40.7657	2.9906	0.612825	4.88002	1.06e-06	5.76e-05
ENSG00000186417	GLDN	protein_coding	55.8743	9.10362	1.86554	4.8799	1.06e-06	5.76e-05
ENSG00000149054	ZNF215	protein_coding	7.95624	6.27847	1.2886	4.87231	1.1e-06	5.97e-05
ENSG00000101447	FAM83D	protein_coding	27.1347	2.49706	0.513174	4.86591	1.14e-06	6.15e-05
ENSG00000197859	ADAMTSL2	protein_coding	8.60856	4.60807	0.947191	4.86498	1.14e-06	6.16e-05
ENSG00000162909	CAPN2	protein_coding	1201.99	-1.37535	0.282736	-4.86445	1.15e-06	6.16e-05
ENSG00000093009	CDC45	protein_coding	24.5483	2.77783	0.571118	4.86384	1.15e-06	6.17e-05
ENSG00000071539	TRIP13	protein_coding	14.4842	2.7337	0.562702	4.85816	1.18e-06	6.33e-05
ENSG00000008952	SEC62	protein_coding	3292.14	1.61637	0.333153	4.85173	1.22e-06	6.52e-05
ENSG00000280027	ENSG00000280027	TEC	46.7674	-2.8991	0.598417	-4.84461	1.27e-06	6.72e-05
ENSG00000268119	ENSG00000268119	lncRNA	76.3276	2.37335	0.489902	4.84453	1.27e-06	6.72e-05
ENSG00000101928	MOSPD1	protein_coding	206.128	1.77865	0.367653	4.83786	1.31e-06	6.92e-05
ENSG00000100427	MLC1	protein_coding	199.598	1.83239	0.378773	4.83771	1.31e-06	6.92e-05
ENSG00000008441	NFIX	protein_coding	1840.41	2.45119	0.506932	4.83534	1.33e-06	6.99e-05
ENSG00000162458	FBLIM1	protein_coding	17.5879	7.42279	1.53539	4.83447	1.34e-06	7e-05
ENSG00000166947	EPB42	protein_coding	5240.73	2.60646	0.539202	4.83391	1.34e-06	7e-05
ENSG00000290242	ENSG00000290242	lncRNA	13.2441	4.56472	0.944484	4.83303	1.34e-06	7e-05
ENSG00000162104	ADCY9	protein_coding	51.8813	-2.10308	0.435168	-4.8328	1.35e-06	7e-05
ENSG00000102796	DHRS12	protein_coding	191.617	-2.47698	0.513879	-4.82016	1.43e-06	7.44e-05
ENSG00000259097	ENSG00000259097	lncRNA	14.5349	3.34252	0.693972	4.81651	1.46e-06	7.56e-05
ENSG00000166770	ZNF667-AS1	lncRNA	42.3888	2.41937	0.502885	4.81098	1.5e-06	7.74e-05
ENSG00000203709	MIR29B2CHG	lncRNA	162.482	-1.77542	0.369085	-4.81031	1.51e-06	7.74e-05
ENSG00000215475	SIAH3	protein_coding	9.67267	5.136	1.06776	4.81007	1.51e-06	7.74e-05
ENSG00000174891	RSRC1	protein_coding	255.395	1.44272	0.300343	4.80359	1.56e-06	7.98e-05
ENSG00000148175	STOM	protein_coding	4280.67	1.77431	0.369719	4.79908	1.59e-06	8.14e-05
ENSG00000173542	MOB1B	protein_coding	458.336	1.99589	0.416332	4.794	1.63e-06	8.33e-05
ENSG00000274767	ENSG00000274767	lncRNA	74.664	-2.52407	0.527083	-4.78876	1.68e-06	8.51e-05
ENSG00000169744	LDB2	protein_coding	19.5392	3.39198	0.708402	4.78821	1.68e-06	8.51e-05
ENSG00000266338	NBPF15	protein_coding	123.686	-1.71678	0.358557	-4.78802	1.68e-06	8.51e-05
ENSG00000285509	TBCEL-TECTA	protein_coding	32.6685	3.8278	0.800129	4.78397	1.72e-06	8.66e-05
ENSG00000051180	RAD51	protein_coding	24.2404	2.54812	0.532702	4.78337	1.72e-06	8.67e-05
ENSG00000182512	GLRX5	protein_coding	4891.78	2.10958	0.441528	4.77791	1.77e-06	8.88e-05
ENSG00000108309	RUNDC3A	protein_coding	1144.88	2.13647	0.447298	4.77639	1.78e-06	8.93e-05
ENSG00000184481	FOXO4	protein_coding	4316.47	1.69025	0.354432	4.76891	1.85e-06	9.24e-05
ENSG00000196914	ARHGEF12	protein_coding	1179.8	1.97991	0.415798	4.7617	1.92e-06	9.55e-05
ENSG00000124006	OBSL1	protein_coding	30.5765	4.2834	0.901615	4.75081	2.03e-06	0.00010057
ENSG00000264066	ENSG00000264066	lncRNA	5.6827	6.54829	1.3788	4.74926	2.04e-06	0.00010109
ENSG00000100012	SEC14L3	protein_coding	56.8027	2.59768	0.547565	4.74406	2.09e-06	0.00010346
ENSG00000130821	SLC6A8	protein_coding	3123.72	2.18281	0.460526	4.73982	2.14e-06	0.00010532
ENSG00000256020	ENSG00000256020	lncRNA	147.484	3.12492	0.659346	4.73943	2.14e-06	0.00010532
ENSG00000278918	ENSG00000278918	TEC	59.9019	-1.84582	0.39073	-4.72402	2.31e-06	0.00011311
ENSG00000103647	CORO2B	protein_coding	28.2631	2.09068	0.442569	4.72396	2.31e-06	0.00011311
ENSG00000141469	SLC14A1	protein_coding	2775.35	2.7199	0.575962	4.72237	2.33e-06	0.00011371
ENSG00000100307	CBX7	protein_coding	736.106	-0.973553	0.206343	-4.71814	2.38e-06	0.00011582
ENSG00000064012	CASP8	protein_coding	1680.36	-1.74314	0.369944	-4.71189	2.45e-06	0.00011913
ENSG00000101076	HNF4A	protein_coding	12.3454	5.12567	1.08928	4.70557	2.53e-06	0.00012258
ENSG00000172379	ARNT2	protein_coding	6.92058	6.04854	1.28627	4.70238	2.57e-06	0.00012396
ENSG00000183691	NOG	protein_coding	155.657	2.45644	0.522392	4.70229	2.57e-06	0.00012396
ENSG00000259986	ENSG00000259986	lncRNA	28.2613	3.92352	0.835813	4.69426	2.68e-06	0.00012861
ENSG00000224000	ENSG00000224000	lncRNA	11.0915	4.00795	0.854079	4.69272	2.7e-06	0.00012927
ENSG00000234261	ENSG00000234261	lncRNA	21.2777	3.28385	0.699912	4.69181	2.71e-06	0.00012953
ENSG00000272636	DOC2B	protein_coding	48.9286	3.17491	0.676879	4.69052	2.73e-06	0.00013004
ENSG00000142945	KIF2C	protein_coding	46.2035	2.56311	0.546635	4.68889	2.75e-06	0.00013076
ENSG00000287166	ENSG00000287166	lncRNA	36.2822	2.72054	0.580454	4.68692	2.77e-06	0.0001317
ENSG00000117650	NEK2	protein_coding	26.352	3.39733	0.725097	4.68535	2.79e-06	0.00013218
ENSG00000172270	BSG	protein_coding	27146.4	2.10235	0.448721	4.6852	2.8e-06	0.00013218
ENSG00000169439	SDC2	protein_coding	31.0925	-2.37825	0.507699	-4.68436	2.81e-06	0.0001324
ENSG00000260455	NBAT1	lncRNA	4.43803	6.18634	1.32113	4.68261	2.83e-06	0.00013322
ENSG00000163347	CLDN1	protein_coding	16.1469	6.03815	1.29327	4.66892	3.03e-06	0.00014207
ENSG00000173898	SPTBN2	protein_coding	16.1943	3.31748	0.71108	4.66541	3.08e-06	0.00014393
ENSG00000112984	KIF20A	protein_coding	27.4497	2.95955	0.634379	4.66528	3.08e-06	0.00014393
ENSG00000107331	ABCA2	protein_coding	696.332	-1.51414	0.326032	-4.64415	3.41e-06	0.00015909
ENSG00000082146	STRADB	protein_coding	11619.4	2.10817	0.454388	4.63958	3.49e-06	0.00016216
ENSG00000166405	RIC3	protein_coding	47.5125	-2.65464	0.572245	-4.63899	3.5e-06	0.00016216
ENSG00000159423	ALDH4A1	protein_coding	88.0246	1.95325	0.421073	4.63874	3.51e-06	0.00016216
ENSG00000168496	FEN1	protein_coding	133.123	1.43125	0.308659	4.63698	3.54e-06	0.00016316
ENSG00000269404	SPIB	protein_coding	110.954	1.20866	0.260768	4.63501	3.57e-06	0.00016434
ENSG00000224940	PRRT4	protein_coding	27.1469	3.13479	0.677168	4.62926	3.67e-06	0.00016857
ENSG00000103485	QPRT	protein_coding	54.4022	2.81141	0.607729	4.62609	3.73e-06	0.00017078
ENSG00000116729	WLS	protein_coding	413.648	-1.81907	0.39369	-4.62057	3.83e-06	0.00017498
ENSG00000186063	AIDA	protein_coding	536.976	1.36168	0.295054	4.615	3.93e-06	0.00017932
ENSG00000291144	ENSG00000291144	lncRNA	83.4412	-2.22398	0.482016	-4.61392	3.95e-06	0.00017984
ENSG00000244300	GATA2-AS1	lncRNA	18.4363	5.78554	1.2548	4.61075	4.01e-06	0.00018219
ENSG00000105737	GRIK5	protein_coding	11.5324	3.24083	0.703238	4.60844	4.06e-06	0.00018363
ENSG00000024526	DEPDC1	protein_coding	20.28	3.7974	0.824062	4.60815	4.06e-06	0.00018363
ENSG00000288961	ENSG00000288961	lncRNA	48.3151	2.29104	0.497466	4.60543	4.12e-06	0.00018562
ENSG00000233429	HOTAIRM1	lncRNA	142.908	-2.08675	0.453212	-4.60436	4.14e-06	0.00018615
ENSG00000049540	ELN	protein_coding	6.56556	5.98922	1.30121	4.6028	4.17e-06	0.00018712
ENSG00000148218	ALAD	protein_coding	782.813	1.56852	0.340871	4.6015	4.19e-06	0.00018787
ENSG00000170315	UBB	protein_coding	32253	1.80921	0.393427	4.59859	4.25e-06	0.00019008
ENSG00000129244	ATP1B2	protein_coding	61.2792	3.95601	0.860416	4.59778	4.27e-06	0.00019039
ENSG00000186792	HYAL3	protein_coding	75.2703	1.88569	0.410273	4.59617	4.3e-06	0.00019143
ENSG00000179909	ZNF154	protein_coding	73.7792	1.76446	0.384226	4.59224	4.39e-06	0.00019464
ENSG00000166046	TCP11L2	protein_coding	975.437	1.49264	0.325236	4.58942	4.44e-06	0.00019684
ENSG00000026751	SLAMF7	protein_coding	507.799	-1.5799	0.344338	-4.58822	4.47e-06	0.00019753
ENSG00000004939	SLC4A1	protein_coding	41483.7	2.4044	0.524106	4.58762	4.48e-06	0.00019766
ENSG00000182795	C1orf116	protein_coding	38.982	1.9567	0.426581	4.58694	4.5e-06	0.00019785
ENSG00000165480	SKA3	protein_coding	11.0707	3.05252	0.666218	4.58187	4.61e-06	0.00020227
ENSG00000168754	FAM178B	protein_coding	16.6194	3.50128	0.764726	4.57847	4.68e-06	0.00020512
ENSG00000121621	KIF18A	protein_coding	16.3636	2.24777	0.491113	4.57689	4.72e-06	0.00020622
ENSG00000029534	ANK1	protein_coding	2559.32	2.36371	0.516716	4.57448	4.77e-06	0.00020814
ENSG00000183856	IQGAP3	protein_coding	15.5827	2.62299	0.573479	4.57382	4.79e-06	0.00020834
ENSG00000144354	CDCA7	protein_coding	56.9016	2.05756	0.449913	4.57323	4.8e-06	0.00020847
ENSG00000110237	ARHGEF17	protein_coding	23.6801	2.16653	0.474072	4.57005	4.88e-06	0.00021119
ENSG00000182732	RGS6	protein_coding	298.084	2.26815	0.496428	4.56894	4.9e-06	0.00021185
ENSG00000163818	LZTFL1	protein_coding	119.07	1.22735	0.268936	4.56375	5.02e-06	0.00021669
ENSG00000118046	STK11	protein_coding	1831.76	1.3578	0.298114	4.55463	5.25e-06	0.0002258
ENSG00000075340	ADD2	protein_coding	240.819	2.54099	0.558394	4.55053	5.35e-06	0.00022975
ENSG00000164292	RHOBTB3	protein_coding	165.678	3.81848	0.83939	4.54912	5.39e-06	0.00023011
ENSG00000272021	ENSG00000272021	lncRNA	4.24642	6.10002	1.34098	4.54893	5.39e-06	0.00023011
ENSG00000113108	APBB3	protein_coding	161.624	-1.36428	0.299919	-4.54882	5.39e-06	0.00023011
ENSG00000182492	BGN	protein_coding	32.4603	9.04267	1.98895	4.54646	5.46e-06	0.00023212
ENSG00000163808	KIF15	protein_coding	26.1095	2.79073	0.613875	4.54609	5.47e-06	0.00023212
ENSG00000177868	SVBP	protein_coding	150.878	1.30043	0.286419	4.54031	5.62e-06	0.00023805
ENSG00000077157	PPP1R12B	protein_coding	460.281	-1.63592	0.360738	-4.53493	5.76e-06	0.00024368
ENSG00000290652	ENSG00000290652	lncRNA	5.01542	6.34275	1.40054	4.52879	5.93e-06	0.00025033
ENSG00000139323	POC1B	protein_coding	760.536	1.44346	0.319039	4.52438	6.06e-06	0.00025506
ENSG00000179271	GADD45GIP1	protein_coding	341.734	1.5287	0.338923	4.51045	6.47e-06	0.00027182
ENSG00000132386	SERPINF1	protein_coding	131.349	1.81471	0.402428	4.50941	6.5e-06	0.00027258
ENSG00000175643	RMI2	protein_coding	53.4064	1.83294	0.40691	4.50455	6.65e-06	0.000278
ENSG00000163751	CPA3	protein_coding	37.5166	3.04025	0.674961	4.50433	6.66e-06	0.000278
ENSG00000012983	MAP4K5	protein_coding	340.039	1.56999	0.348679	4.50269	6.71e-06	0.00027956
ENSG00000135451	TROAP	protein_coding	41.5463	3.05974	0.679995	4.49965	6.81e-06	0.00028299
ENSG00000120337	TNFSF18	protein_coding	17.5672	6.66278	1.48106	4.49864	6.84e-06	0.00028373
ENSG00000039068	CDH1	protein_coding	31.5916	2.85184	0.634327	4.49586	6.93e-06	0.00028687
ENSG00000172867	KRT2	protein_coding	13.8731	2.96099	0.659058	4.49275	7.03e-06	0.00029003
ENSG00000288838	ENSG00000288838	lncRNA	206.674	-2.0495	0.456191	-4.49263	7.03e-06	0.00029003
ENSG00000164929	BAALC	protein_coding	11.1262	3.59849	0.801193	4.49142	7.08e-06	0.00029088
ENSG00000214253	FIS1	protein_coding	3062.18	1.89895	0.422823	4.49112	7.08e-06	0.00029088
ENSG00000203780	FANK1	protein_coding	16.7016	2.45617	0.547182	4.48877	7.16e-06	0.0002935
ENSG00000007312	CD79B	protein_coding	379.237	1.1617	0.258887	4.48728	7.21e-06	0.00029494
ENSG00000135362	PRR5L	protein_coding	205.529	-1.51787	0.338501	-4.4841	7.32e-06	0.00029876
ENSG00000104903	LYL1	protein_coding	5210.63	1.80901	0.40351	4.48319	7.35e-06	0.00029942
ENSG00000120217	CD274	protein_coding	190.578	-2.35118	0.524605	-4.4818	7.4e-06	0.00030075
ENSG00000105357	MYH14	protein_coding	5.63862	5.75926	1.28628	4.47745	7.55e-06	0.00030586
ENSG00000189060	H1-0	protein_coding	732.987	1.94425	0.434244	4.47732	7.56e-06	0.00030586
ENSG00000063854	HAGH	protein_coding	4564.24	1.98025	0.442357	4.4766	7.58e-06	0.0003061
ENSG00000112394	SLC16A10	protein_coding	50.6401	2.10065	0.469285	4.47628	7.6e-06	0.0003061
ENSG00000167664	TMIGD2	protein_coding	255.955	2.08431	0.465715	4.47552	7.62e-06	0.00030657
ENSG00000140526	ABHD2	protein_coding	1427.81	-2.01489	0.450353	-4.47402	7.68e-06	0.00030809
ENSG00000132819	RBM38	protein_coding	16779.4	2.08679	0.466494	4.47335	7.7e-06	0.00030843
ENSG00000179262	RAD23A	protein_coding	1834.1	1.84931	0.413512	4.47221	7.74e-06	0.00030946
ENSG00000214706	IFRD2	protein_coding	264.984	1.4331	0.320813	4.46709	7.93e-06	0.00031631
ENSG00000225756	DBH-AS1	lncRNA	73.0449	3.02795	0.678061	4.4656	7.98e-06	0.00031788
ENSG00000232815	DUX4L50	unprocessed_pseudogene	92.7103	-1.86786	0.418365	-4.46467	8.02e-06	0.00031861
ENSG00000160219	GAB3	protein_coding	506.4	-1.32177	0.296294	-4.461	8.16e-06	0.00032347
ENSG00000174371	EXO1	protein_coding	13.0257	3.0596	0.686362	4.45771	8.28e-06	0.00032782
ENSG00000207101	Y_RNA	misc_RNA	6.22602	5.91991	1.32818	4.45715	8.31e-06	0.00032801
ENSG00000232284	GNG12-AS1	lncRNA	5.83683	-5.43811	1.22041	-4.45596	8.35e-06	0.00032918
ENSG00000256862	PARP11-AS1	lncRNA	55.9672	1.93095	0.433388	4.45548	8.37e-06	0.00032925
ENSG00000112414	ADGRG6	protein_coding	13.6301	2.89702	0.6503	4.4549	8.39e-06	0.0003295
ENSG00000232021	LEF1-AS1	lncRNA	53.1728	2.26134	0.508379	4.44814	8.66e-06	0.00033935
ENSG00000137812	KNL1	protein_coding	24.5787	2.64546	0.595241	4.44434	8.82e-06	0.0003444
ENSG00000109674	NEIL3	protein_coding	11.1813	3.0043	0.676018	4.44411	8.83e-06	0.0003444
ENSG00000119782	FKBP1B	protein_coding	69.9133	1.94162	0.43727	4.44032	8.98e-06	0.00034984
ENSG00000204613	TRIM10	protein_coding	935.22	2.53209	0.570781	4.43619	9.16e-06	0.00035591
ENSG00000248019	FAM13A-AS1	lncRNA	298.126	-1.63922	0.369816	-4.43253	9.31e-06	0.00035999
ENSG00000127252	PLAAT1	protein_coding	8.70257	-5.2804	1.19131	-4.43243	9.32e-06	0.00035999
ENSG00000160360	GPSM1	protein_coding	49.1879	1.76795	0.398888	4.43219	9.33e-06	0.00035999
ENSG00000065328	MCM10	protein_coding	14.3689	2.91839	0.658474	4.43204	9.33e-06	0.00035999
ENSG00000062524	LTK	protein_coding	49.1057	-3.21919	0.72642	-4.43158	9.35e-06	0.00036005
ENSG00000038945	MSR1	protein_coding	56.7284	-2.20877	0.498875	-4.4275	9.53e-06	0.00036621
ENSG00000007062	PROM1	protein_coding	9.55313	5.80451	1.31214	4.4237	9.7e-06	0.00037199
ENSG00000179299	NSUN7	protein_coding	129.367	-2.72778	0.616843	-4.42216	9.77e-06	0.00037376
ENSG00000135776	ABCB10	protein_coding	309.356	1.86874	0.422615	4.42184	9.79e-06	0.00037376
ENSG00000141664	ZCCHC2	protein_coding	296.071	-1.24536	0.281741	-4.42021	9.86e-06	0.00037587
ENSG00000127423	AUNIP	protein_coding	14.1791	2.82399	0.639174	4.41819	9.95e-06	0.00037866
ENSG00000112742	TTK	protein_coding	22.8138	2.97555	0.673835	4.41585	1.01e-05	0.00038205
ENSG00000239697	TNFSF12	protein_coding	156.463	-1.25207	0.283679	-4.41368	1.02e-05	0.00038515
ENSG00000170074	FAM153A	protein_coding	37.1529	-3.07758	0.698272	-4.40742	1.05e-05	0.0003957
ENSG00000135407	AVIL	protein_coding	140.3	-1.94848	0.442222	-4.40612	1.05e-05	0.00039731
ENSG00000100490	CDKL1	protein_coding	414.455	2.2438	0.509924	4.40026	1.08e-05	0.0004074
ENSG00000173064	HECTD4	protein_coding	671.705	1.47402	0.335055	4.39932	1.09e-05	0.00040839
ENSG00000289536	ENSG00000289536	lncRNA	9.65334	4.37348	0.995087	4.39508	1.11e-05	0.00041566
ENSG00000257108	NHLRC4	protein_coding	40.7925	1.98719	0.452487	4.39171	1.12e-05	0.00042114
ENSG00000238222	MKRN4P	processed_pseudogene	102.747	2.03579	0.463584	4.39141	1.13e-05	0.00042114
ENSG00000196873	ZNG1C	protein_coding	87.2982	-1.80691	0.411662	-4.38931	1.14e-05	0.00042441
ENSG00000197093	GAL3ST4	protein_coding	143.345	1.69935	0.387353	4.38709	1.15e-05	0.00042796
ENSG00000075218	GTSE1	protein_coding	29.0657	2.34548	0.534923	4.38471	1.16e-05	0.00043185
ENSG00000102038	SMARCA1	protein_coding	13.9797	3.19003	0.728377	4.37965	1.19e-05	0.00044117
ENSG00000287958	ENSG00000287958	lncRNA	32.3501	-2.07384	0.473582	-4.37904	1.19e-05	0.00044123
ENSG00000148143	ZNF462	protein_coding	10.2072	3.25771	0.74408	4.37817	1.2e-05	0.00044123
ENSG00000156711	MAPK13	protein_coding	802.586	-1.46716	0.335118	-4.37804	1.2e-05	0.00044123
ENSG00000110324	IL10RA	protein_coding	1628.84	-1.0069	0.229991	-4.37798	1.2e-05	0.00044123
ENSG00000130830	MPP1	protein_coding	8319.55	1.64512	0.375818	4.37744	1.2e-05	0.00044151
ENSG00000173559	NABP1	protein_coding	1713.75	-2.29753	0.525135	-4.37512	1.21e-05	0.00044539
ENSG00000142208	AKT1	protein_coding	742.503	-1.16563	0.266453	-4.37462	1.22e-05	0.00044558
ENSG00000143627	PKLR	protein_coding	7.50473	5.44311	1.24469	4.37305	1.23e-05	0.00044796
ENSG00000152253	SPC25	protein_coding	13.9376	2.54885	0.582947	4.37235	1.23e-05	0.00044857
ENSG00000198734	F5	protein_coding	551.338	-2.43075	0.556402	-4.36869	1.25e-05	0.00045532
ENSG00000165029	ABCA1	protein_coding	118.658	-1.78948	0.409904	-4.3656	1.27e-05	0.00046094
ENSG00000259129	LINC00648	lncRNA	4.2262	6.11049	1.40069	4.36249	1.29e-05	0.00046669
ENSG00000214548	MEG3	lncRNA	22.8608	3.9029	0.894794	4.36178	1.29e-05	0.00046734
ENSG00000175130	MARCKSL1	protein_coding	645.571	0.932489	0.213863	4.36021	1.3e-05	0.000469
ENSG00000029993	HMGB3	protein_coding	384.127	4.9197	1.12832	4.3602	1.3e-05	0.000469
ENSG00000239906	ENSG00000239906	lncRNA	76.9513	-3.0815	0.707185	-4.35741	1.32e-05	0.00047416
ENSG00000079308	TNS1	protein_coding	3996.75	2.14607	0.492699	4.35575	1.33e-05	0.00047689
ENSG00000070526	ST6GALNAC1	protein_coding	13.8309	2.68797	0.617339	4.35413	1.34e-05	0.00047956
ENSG00000182463	TSHZ2	protein_coding	17.4384	-4.42478	1.01647	-4.35308	1.34e-05	0.00048099
ENSG00000105393	BABAM1	protein_coding	597.344	1.63523	0.376149	4.34729	1.38e-05	0.00049295
ENSG00000233387	IATPR	lncRNA	13.086	-3.68972	0.848836	-4.34679	1.38e-05	0.00049318
ENSG00000164626	KCNK5	protein_coding	22.6201	2.10728	0.485074	4.34425	1.4e-05	0.00049803
ENSG00000108465	CDK5RAP3	protein_coding	195.346	-1.27649	0.293898	-4.34332	1.4e-05	0.00049923
ENSG00000228716	DHFR	protein_coding	208.015	1.1256	0.259333	4.34038	1.42e-05	0.00050504
ENSG00000197536	IRF1-AS1	lncRNA	160.72	-1.2146	0.279873	-4.33981	1.43e-05	0.00050504
ENSG00000117450	PRDX1	protein_coding	911.377	1.04857	0.241631	4.33955	1.43e-05	0.00050504
ENSG00000143228	NUF2	protein_coding	28.9783	2.18128	0.502691	4.3392	1.43e-05	0.00050504
ENSG00000128218	VPREB3	protein_coding	88.7204	1.63214	0.376201	4.33849	1.43e-05	0.00050577
ENSG00000143727	ACP1	protein_coding	1406.75	1.72836	0.398496	4.33721	1.44e-05	0.00050782
ENSG00000114166	KAT2B	protein_coding	2417.98	1.49343	0.34451	4.33494	1.46e-05	0.00051218
ENSG00000168785	TSPAN5	protein_coding	2962.67	1.99378	0.460069	4.33364	1.47e-05	0.00051428
ENSG00000131462	TUBG1	protein_coding	119.233	1.83252	0.422915	4.33307	1.47e-05	0.00051471
ENSG00000100968	NFATC4	protein_coding	9.38473	4.78822	1.10515	4.33263	1.47e-05	0.00051482
ENSG00000173369	C1QB	protein_coding	33.7562	-2.7933	0.645627	-4.32648	1.52e-05	0.00052808
ENSG00000143167	GPA33	protein_coding	129.308	1.94746	0.45015	4.32625	1.52e-05	0.00052808
ENSG00000230257	NFE4	lncRNA	176.54	-2.39077	0.553514	-4.31926	1.57e-05	0.00054326
ENSG00000047597	XK	protein_coding	1609.76	2.63234	0.609446	4.31922	1.57e-05	0.00054326
ENSG00000275395	FCGBP	protein_coding	209.077	1.45068	0.33604	4.31698	1.58e-05	0.00054783
ENSG00000138756	BMP2K	protein_coding	805.146	1.73786	0.402642	4.31615	1.59e-05	0.00054894
ENSG00000286546	ENSG00000286546	lncRNA	9.40512	3.07243	0.712289	4.31345	1.61e-05	0.00055471
ENSG00000004468	CD38	protein_coding	225.626	1.32147	0.306405	4.31283	1.61e-05	0.00055531
ENSG00000136999	CCN3	protein_coding	40.1738	-2.44358	0.566888	-4.31051	1.63e-05	0.00055948
ENSG00000275210	ENSG00000275210	lncRNA	53.576	-2.69405	0.625011	-4.3104	1.63e-05	0.00055948
ENSG00000007541	PIGQ	protein_coding	478.479	1.98486	0.460554	4.30972	1.63e-05	0.00056023
ENSG00000129465	RIPK3	protein_coding	196.86	-1.19156	0.27653	-4.30896	1.64e-05	0.00056119
ENSG00000269564	ENSG00000269564	lncRNA	10.5643	-4.87106	1.13161	-4.30453	1.67e-05	0.00057154
ENSG00000147234	FRMPD3	protein_coding	17.0412	-3.25949	0.758613	-4.29665	1.73e-05	0.00059122
ENSG00000118200	CAMSAP2	protein_coding	64.3756	2.44578	0.569598	4.29387	1.76e-05	0.00059762
ENSG00000225313	ENSG00000225313	lncRNA	137.546	-2.0598	0.479819	-4.29287	1.76e-05	0.00059929
ENSG00000133477	FAM83F	protein_coding	38.4615	3.28077	0.764305	4.29249	1.77e-05	0.00059929
ENSG00000198835	GJC2	protein_coding	34.3012	2.03914	0.475261	4.29057	1.78e-05	0.00060282
ENSG00000067048	DDX3Y	protein_coding	104.742	8.3888	1.95524	4.29042	1.78e-05	0.00060282
ENSG00000105835	NAMPT	protein_coding	29605.1	-2.42693	0.566718	-4.28243	1.85e-05	0.00062382
ENSG00000135916	ITM2C	protein_coding	468.391	1.3808	0.322507	4.28147	1.86e-05	0.00062546
ENSG00000112294	ALDH5A1	protein_coding	716.489	2.49453	0.583013	4.27869	1.88e-05	0.00063221
ENSG00000164398	ACSL6	protein_coding	300.441	2.3762	0.555464	4.27787	1.89e-05	0.00063347
ENSG00000137965	IFI44	protein_coding	184.332	-2.03619	0.476144	-4.27642	1.9e-05	0.00063652
ENSG00000197948	FCHSD1	protein_coding	345.405	-1.29323	0.302447	-4.27587	1.9e-05	0.00063701
ENSG00000050820	BCAR1	protein_coding	20.2533	5.55701	1.30035	4.27347	1.92e-05	0.00064282
ENSG00000146592	CREB5	protein_coding	2420.42	-2.27651	0.532868	-4.27217	1.94e-05	0.00064549
ENSG00000214922	HLA-F-AS1	lncRNA	16.923	-2.94854	0.690285	-4.27149	1.94e-05	0.00064638
ENSG00000109572	CLCN3	protein_coding	545.851	1.47712	0.345946	4.26981	1.96e-05	0.00065016
ENSG00000163106	HPGDS	protein_coding	10.5925	3.62169	0.849531	4.26316	2.02e-05	0.00066868
ENSG00000103363	ELOB	protein_coding	2477.76	1.38688	0.325765	4.2573	2.07e-05	0.0006853
ENSG00000170364	SETMAR	protein_coding	56.4259	1.34563	0.316104	4.25692	2.07e-05	0.00068532
ENSG00000254802	ENSG00000254802	lncRNA	5.52728	-5.3541	1.25815	-4.25554	2.09e-05	0.0006884
ENSG00000116741	RGS2	protein_coding	8549.05	-2.39262	0.562346	-4.25472	2.09e-05	0.00068882
ENSG00000091651	ORC6	protein_coding	21.0184	2.12864	0.500307	4.25466	2.09e-05	0.00068882
ENSG00000165124	SVEP1	protein_coding	21.1393	4.99267	1.17362	4.25407	2.1e-05	0.00068949
ENSG00000210196	MT-TP	Mt_tRNA	579.331	1.92592	0.452937	4.25208	2.12e-05	0.00069449
ENSG00000130208	APOC1	protein_coding	4.36623	6.13077	1.44209	4.25131	2.13e-05	0.00069572
ENSG00000115956	PLEK	protein_coding	4205.61	-1.64741	0.387564	-4.25067	2.13e-05	0.00069654
ENSG00000288076	ENSG00000288076	lncRNA	11.1019	3.91099	0.920193	4.25019	2.14e-05	0.00069689
ENSG00000290385	ENSG00000290385	lncRNA	150.131	-2.83183	0.666679	-4.24767	2.16e-05	0.00070361
ENSG00000124490	CRISP2	protein_coding	10.7347	3.22463	0.759558	4.2454	2.18e-05	0.00070852
ENSG00000181523	SGSH	protein_coding	256.232	-1.06803	0.251575	-4.24537	2.18e-05	0.00070852
ENSG00000185527	PDE6G	protein_coding	47.5044	1.96286	0.462551	4.24355	2.2e-05	0.00071295
ENSG00000135047	CTSL	protein_coding	242.552	1.43089	0.337236	4.24299	2.21e-05	0.00071295
ENSG00000204161	TMEM273	protein_coding	177.8	-1.38911	0.327399	-4.24287	2.21e-05	0.00071295
ENSG00000187266	EPOR	protein_coding	225.434	1.19973	0.282792	4.24245	2.21e-05	0.00071309
ENSG00000116199	FAM20B	protein_coding	521.649	1.26098	0.297258	4.24204	2.21e-05	0.00071324
ENSG00000230724	LINC01001	lncRNA	215.92	-2.11006	0.498092	-4.23629	2.27e-05	0.00073055
ENSG00000099968	BCL2L13	protein_coding	816.278	1.02622	0.242307	4.2352	2.28e-05	0.0007329
ENSG00000287566	ENSG00000287566	lncRNA	4.61335	5.47267	1.2926	4.23384	2.3e-05	0.00073508
ENSG00000262714	ENSG00000262714	lncRNA	51.5206	-2.24902	0.531206	-4.2338	2.3e-05	0.00073508
ENSG00000087586	AURKA	protein_coding	53.2497	2.10361	0.497103	4.23173	2.32e-05	0.00074068
ENSG00000181856	SLC2A4	protein_coding	49.1591	2.92529	0.691932	4.22772	2.36e-05	0.0007528
ENSG00000136261	BZW2	protein_coding	486.638	2.60874	0.617363	4.22562	2.38e-05	0.00075863
ENSG00000135116	HRK	protein_coding	26.6145	2.25132	0.533386	4.22081	2.43e-05	0.00077373
ENSG00000222037	IGLC6	IG_C_pseudogene	17.3436	3.15166	0.747116	4.21844	2.46e-05	0.00078067
ENSG00000143416	SELENBP1	protein_coding	12335.5	2.60725	0.618254	4.21711	2.47e-05	0.000784
ENSG00000187753	C9orf153	protein_coding	9.1334	3.45835	0.820735	4.21373	2.51e-05	0.00079457
ENSG00000127564	PKMYT1	protein_coding	25.0555	2.31147	0.548911	4.21102	2.54e-05	0.00080288
ENSG00000139734	DIAPH3	protein_coding	10.0278	4.06458	0.965432	4.21012	2.55e-05	0.0008048
ENSG00000173531	MST1	protein_coding	71.4277	1.863	0.442594	4.20928	2.56e-05	0.00080649
ENSG00000173207	CKS1B	protein_coding	97.0548	1.99114	0.473118	4.20854	2.57e-05	0.00080785
ENSG00000197375	SLC22A5	protein_coding	77.8684	-1.40319	0.333701	-4.20495	2.61e-05	0.00081948
ENSG00000065615	CYB5R4	protein_coding	1118.79	-1.70956	0.406778	-4.20268	2.64e-05	0.00082641
ENSG00000165617	DACT1	protein_coding	58.898	2.35034	0.559324	4.20212	2.64e-05	0.00082716
ENSG00000108821	COL1A1	protein_coding	22.2494	4.37994	1.04318	4.19864	2.69e-05	0.00083865
ENSG00000143891	GALM	protein_coding	105.115	-1.09505	0.260841	-4.19814	2.69e-05	0.00083915
ENSG00000105246	EBI3	protein_coding	78.6973	6.11269	1.45623	4.19762	2.7e-05	0.00083976
ENSG00000183762	KREMEN1	protein_coding	1196.15	-2.28999	0.545875	-4.19508	2.73e-05	0.00084759
ENSG00000246273	SBF2-AS1	lncRNA	49.4176	2.20217	0.524995	4.19465	2.73e-05	0.00084759
ENSG00000132613	MTSS2	protein_coding	20.7519	2.53013	0.603251	4.19416	2.74e-05	0.00084759
ENSG00000161921	CXCL16	protein_coding	522.673	-1.89925	0.452855	-4.19394	2.74e-05	0.00084759
ENSG00000096996	IL12RB1	protein_coding	314.577	-1.17783	0.280855	-4.19373	2.74e-05	0.00084759
ENSG00000087116	ADAMTS2	protein_coding	22.4045	-5.84486	1.39552	-4.1883	2.81e-05	0.00086676
ENSG00000124102	PI3	protein_coding	465.127	-2.07056	0.494444	-4.18766	2.82e-05	0.00086786
ENSG00000117318	ID3	protein_coding	183.018	1.56855	0.374743	4.18566	2.84e-05	0.0008736
ENSG00000130165	ELOF1	protein_coding	1302.86	1.57789	0.376992	4.18546	2.85e-05	0.0008736
ENSG00000260231	KDM7A-DT	lncRNA	603.438	1.53299	0.366537	4.18235	2.89e-05	0.00088403
ENSG00000102524	TNFSF13B	protein_coding	1563.19	-2.58212	0.617428	-4.18205	2.89e-05	0.00088403
ENSG00000162722	TRIM58	protein_coding	10523.5	2.19718	0.525723	4.17935	2.92e-05	0.00089322
ENSG00000242550	SERPINB10	protein_coding	132.064	2.65103	0.634552	4.17779	2.94e-05	0.00089795
ENSG00000174718	RESF1	protein_coding	3094.96	-2.15338	0.516067	-4.17267	3.01e-05	0.00091697
ENSG00000164045	CDC25A	protein_coding	21.6656	2.27148	0.54457	4.17115	3.03e-05	0.00091971
ENSG00000115687	PASK	protein_coding	322.511	1.40735	0.337417	4.17096	3.03e-05	0.00091971
ENSG00000126775	ATG14	protein_coding	284.867	1.31911	0.316262	4.17094	3.03e-05	0.00091971
ENSG00000171408	PDE7B	protein_coding	16.273	2.59251	0.62178	4.1695	3.05e-05	0.00092412
ENSG00000177311	ZBTB38	protein_coding	191.408	-1.69242	0.406219	-4.16628	3.1e-05	0.0009358
ENSG00000168016	TRANK1	protein_coding	1187.64	-1.27527	0.306204	-4.16479	3.12e-05	0.00094048
ENSG00000156970	BUB1B	protein_coding	23.2171	2.42137	0.58181	4.16179	3.16e-05	0.00095148
ENSG00000161040	FBXL13	protein_coding	65.6063	-2.11549	0.508514	-4.16015	3.18e-05	0.0009569
ENSG00000136156	ITM2B	protein_coding	20390.4	-1.56709	0.376762	-4.15937	3.19e-05	0.00095869
ENSG00000204178	MACO1	protein_coding	382.151	1.24712	0.299924	4.15812	3.21e-05	0.00096248
ENSG00000289164	ENSG00000289164	lncRNA	27.9228	2.91484	0.701232	4.15674	3.23e-05	0.00096685
ENSG00000062716	VMP1	protein_coding	4616.53	-1.94208	0.467325	-4.15573	3.24e-05	0.00096966
ENSG00000183607	GKN2	protein_coding	9.33752	5.74565	1.38369	4.15242	3.29e-05	0.00098229
ENSG00000084110	HAL	protein_coding	757.894	-2.05246	0.494403	-4.15138	3.3e-05	0.00098528
ENSG00000140403	DNAJA4	protein_coding	841.221	1.87085	0.451064	4.14763	3.36e-05	0.00099994
ENSG00000118985	ELL2	protein_coding	398.766	1.50267	0.362324	4.14731	3.36e-05	0.00099994
ENSG00000119411	BSPRY	protein_coding	17.7551	2.45738	0.592813	4.1453	3.39e-05	0.00100724
ENSG00000178607	ERN1	protein_coding	450.562	-1.36111	0.328533	-4.14299	3.43e-05	0.0010159
ENSG00000130222	GADD45G	protein_coding	131.054	3.52905	0.852694	4.13871	3.49e-05	0.00103346
ENSG00000150093	ITGB1	protein_coding	1153.52	-1.11986	0.270637	-4.13786	3.51e-05	0.00103452
ENSG00000100162	CENPM	protein_coding	21.411	2.43048	0.587387	4.13779	3.51e-05	0.00103452
ENSG00000138496	PARP9	protein_coding	1327.89	-1.57145	0.379981	-4.1356	3.54e-05	0.00104289
ENSG00000235105	ENSG00000235105	processed_pseudogene	749.912	1.90618	0.461198	4.13311	3.58e-05	0.00105159
ENSG00000176894	PXMP2	protein_coding	15.7516	1.98826	0.481068	4.133	3.58e-05	0.00105159
ENSG00000228794	LINC01128	lncRNA	141.575	1.44711	0.350208	4.13214	3.59e-05	0.00105396
ENSG00000043093	DCUN1D1	protein_coding	1066.95	1.41468	0.342391	4.13178	3.6e-05	0.00105405
ENSG00000197818	SLC9A8	protein_coding	822.939	-1.67638	0.406473	-4.1242	3.72e-05	0.00108774
ENSG00000138061	CYP1B1	protein_coding	467.071	-2.95112	0.71573	-4.12323	3.74e-05	0.00109075
ENSG00000111802	TDP2	protein_coding	1223.64	-1.54107	0.373943	-4.12113	3.77e-05	0.00109908
ENSG00000138835	RGS3	protein_coding	652.367	-1.53128	0.371621	-4.12056	3.78e-05	0.0011002
ENSG00000170522	ELOVL6	protein_coding	267.122	2.65299	0.644106	4.11887	3.81e-05	0.00110666
ENSG00000242265	PEG10	protein_coding	45.8344	2.78976	0.677413	4.11826	3.82e-05	0.00110798
ENSG00000130635	COL5A1	protein_coding	11.4476	3.22435	0.783652	4.11452	3.88e-05	0.00112287
ENSG00000188175	HEPACAM2	protein_coding	124.556	2.70862	0.658311	4.1145	3.88e-05	0.00112287
ENSG00000115604	IL18R1	protein_coding	353.826	-2.61528	0.636045	-4.11179	3.93e-05	0.00113445
ENSG00000121152	NCAPH	protein_coding	35.0463	1.66544	0.405242	4.10975	3.96e-05	0.00114285
ENSG00000280332	ENSG00000280332	TEC	63.6858	-1.40976	0.343551	-4.10349	4.07e-05	0.0011704
ENSG00000180628	PCGF5	protein_coding	4634.47	1.69663	0.41346	4.10348	4.07e-05	0.0011704
ENSG00000284138	ATP6V0CP4	processed_pseudogene	16.4041	3.11133	0.758263	4.10323	4.07e-05	0.0011704
ENSG00000198363	ASPH	protein_coding	413.615	-2.49095	0.607547	-4.10001	4.13e-05	0.00118507
ENSG00000118473	SGIP1	protein_coding	158.825	2.63074	0.641794	4.09905	4.15e-05	0.0011883
ENSG00000185880	TRIM69	protein_coding	523.334	-1.14171	0.278585	-4.09825	4.16e-05	0.00119069
ENSG00000204103	MAFB	protein_coding	222.016	-2.20102	0.537136	-4.09769	4.17e-05	0.00119181
ENSG00000213205	STRADBP1	processed_pseudogene	119.19	2.14257	0.523134	4.09564	4.21e-05	0.00119991
ENSG00000137414	FAM8A1	protein_coding	1235.33	-2.08434	0.50894	-4.09545	4.21e-05	0.00119991
ENSG00000238113	LINC01410	lncRNA	199.608	-1.9067	0.465705	-4.09422	4.24e-05	0.00120456
ENSG00000115138	POMC	protein_coding	43.0678	2.00128	0.48912	4.0916	4.28e-05	0.00121654
ENSG00000223749	MIR503HG	lncRNA	27.0333	3.68857	0.902036	4.08916	4.33e-05	0.00122763
ENSG00000243317	STMP1	protein_coding	1774.54	1.89713	0.464009	4.08857	4.34e-05	0.00122899
ENSG00000280109	PLAC4	lncRNA	859.365	11.3615	2.78141	4.08479	4.41e-05	0.00124736
ENSG00000269982	ENSG00000269982	lncRNA	75.7754	1.5177	0.371654	4.08365	4.43e-05	0.00125172
ENSG00000188582	PAQR9	protein_coding	104.688	3.67425	0.899921	4.08286	4.45e-05	0.00125416
ENSG00000106366	SERPINE1	protein_coding	27.4453	2.59883	0.636763	4.08131	4.48e-05	0.00126073
ENSG00000163507	CIP2A	protein_coding	27.939	1.90089	0.465898	4.08007	4.5e-05	0.00126532
ENSG00000099860	GADD45B	protein_coding	702.772	-1.45485	0.356602	-4.07976	4.51e-05	0.00126532
ENSG00000186462	NAP1L2	protein_coding	13.1254	-3.65817	0.896724	-4.07948	4.51e-05	0.00126532
ENSG00000119950	MXI1	protein_coding	5847.84	1.82572	0.447799	4.07709	4.56e-05	0.00127657
ENSG00000012817	KDM5D	protein_coding	109.671	9.40615	2.30851	4.07455	4.61e-05	0.00128873
ENSG00000188761	BCL2L15	protein_coding	43.4379	1.87141	0.459348	4.07406	4.62e-05	0.00128965
ENSG00000105472	CLEC11A	protein_coding	95.2122	2.12781	0.522671	4.07103	4.68e-05	0.00130468
ENSG00000229358	DPY19L1P1	unprocessed_pseudogene	17.6675	2.24067	0.550488	4.07034	4.69e-05	0.00130669
ENSG00000033327	GAB2	protein_coding	1474.92	-2.03483	0.500008	-4.06959	4.71e-05	0.00130907
ENSG00000253824	ENSG00000253824	lncRNA	8.89113	5.67898	1.3957	4.0689	4.72e-05	0.00130955
ENSG00000113811	SELENOK	protein_coding	711.746	0.989222	0.243121	4.06885	4.72e-05	0.00130955
ENSG00000149328	GLB1L2	protein_coding	15.9828	-2.753	0.676757	-4.06792	4.74e-05	0.00131289
ENSG00000253986	ENSG00000253986	lncRNA	7.05424	4.2696	1.05034	4.06495	4.8e-05	0.00132786
ENSG00000166741	NNMT	protein_coding	6.70821	6.00363	1.47758	4.06315	4.84e-05	0.00133545
ENSG00000238269	PAGE2B	protein_coding	169.671	2.19312	0.539784	4.06297	4.85e-05	0.00133545
ENSG00000137261	KIAA0319	protein_coding	54.2974	-2.44013	0.601062	-4.05969	4.91e-05	0.00135245
ENSG00000102145	GATA1	protein_coding	1052.83	1.83557	0.452329	4.05805	4.95e-05	0.00136007
ENSG00000251322	SHANK3	protein_coding	7.29546	4.09911	1.01065	4.05593	4.99e-05	0.00137059
ENSG00000140853	NLRC5	protein_coding	1539.82	-0.898503	0.221624	-4.05418	5.03e-05	0.00137898
ENSG00000136824	SMC2	protein_coding	116.345	1.35246	0.333832	4.05131	5.09e-05	0.00139404
ENSG00000151726	ACSL1	protein_coding	16043.3	-2.54393	0.628036	-4.0506	5.11e-05	0.00139631
ENSG00000196407	THEM5	protein_coding	230.591	2.56981	0.634897	4.0476	5.17e-05	0.00141237
ENSG00000239219	ENSG00000239219	lncRNA	13.6312	3.27439	0.809288	4.04601	5.21e-05	0.00142006
ENSG00000198967	OR10Z1	protein_coding	6.68476	5.2952	1.30925	4.04446	5.24e-05	0.00142749
ENSG00000132359	RAP1GAP2	protein_coding	816.176	-1.15234	0.284999	-4.0433	5.27e-05	0.00143258
ENSG00000130733	YIPF2	protein_coding	246.781	1.45763	0.360582	4.04244	5.29e-05	0.00143592
ENSG00000211893	IGHG2	IG_C_gene	209.739	-2.9634	0.733433	-4.04046	5.33e-05	0.00144611
ENSG00000211897	IGHG3	IG_C_gene	55.6611	-2.51717	0.623629	-4.03632	5.43e-05	0.00146979
ENSG00000167994	RAB3IL1	protein_coding	220.727	2.36957	0.587235	4.03513	5.46e-05	0.00147527
ENSG00000115414	FN1	protein_coding	68.7233	3.12856	0.775479	4.03436	5.48e-05	0.00147808
ENSG00000139631	CSAD	protein_coding	284.397	-1.32649	0.328942	-4.03259	5.52e-05	0.00148719
ENSG00000105221	AKT2	protein_coding	2198.94	1.03555	0.256842	4.03187	5.53e-05	0.00148972
ENSG00000133794	BMAL1	protein_coding	416.536	-1.4891	0.369399	-4.03113	5.55e-05	0.00149238
ENSG00000229644	NAMPTP1	processed_pseudogene	4373.04	-2.14927	0.533288	-4.03022	5.57e-05	0.00149407
ENSG00000235169	SMIM1	protein_coding	445.347	2.51336	0.623637	4.03017	5.57e-05	0.00149407
ENSG00000197721	CR1L	protein_coding	100.837	2.26398	0.561794	4.02991	5.58e-05	0.00149407
ENSG00000165233	CARD19	protein_coding	335.141	-1.3262	0.32928	-4.02758	5.64e-05	0.0015069
ENSG00000154153	RETREG1	protein_coding	196.654	1.46503	0.363802	4.02699	5.65e-05	0.00150861
ENSG00000183742	MACC1	protein_coding	14.6144	2.29317	0.569693	4.02527	5.69e-05	0.0015176
ENSG00000146859	TMEM140	protein_coding	1104.56	-1.67837	0.417237	-4.02259	5.76e-05	0.00153293
ENSG00000109854	HTATIP2	protein_coding	556.46	-1.49999	0.37303	-4.02109	5.79e-05	0.00154067
ENSG00000093134	VNN3P	transcribed_unitary_pseudogene	605.03	-2.06842	0.51515	-4.01517	5.94e-05	0.0015777
ENSG00000005189	REXO5	protein_coding	27.6886	2.02488	0.504367	4.0147	5.95e-05	0.00157873
ENSG00000077942	FBLN1	protein_coding	138.772	8.54216	2.12795	4.01427	5.96e-05	0.00157897
ENSG00000100505	TRIM9	protein_coding	33.693	-2.63465	0.656422	-4.01364	5.98e-05	0.00157897
ENSG00000179862	CITED4	protein_coding	168.785	1.79884	0.448216	4.01333	5.99e-05	0.00157897
ENSG00000164251	F2RL1	protein_coding	245.804	-2.48028	0.618032	-4.01319	5.99e-05	0.00157897
ENSG00000197442	MAP3K5	protein_coding	756.172	-1.76319	0.43936	-4.01308	5.99e-05	0.00157897
ENSG00000291077	ENSG00000291077	lncRNA	33.065	2.68445	0.669046	4.01236	6.01e-05	0.00158168
ENSG00000260660	ENSG00000260660	transcribed_unitary_pseudogene	18.0057	-2.84165	0.708454	-4.01106	6.04e-05	0.00158829
ENSG00000278318	ZNF229	protein_coding	14.2996	2.20667	0.55025	4.01031	6.06e-05	0.00159013
ENSG00000224307	LINC02975	lncRNA	142.159	-2.11868	0.528327	-4.01016	6.07e-05	0.00159013
ENSG00000125347	IRF1	protein_coding	2959.02	-1.37864	0.343839	-4.00956	6.08e-05	0.00159208
ENSG00000133943	DGLUCY	protein_coding	736.993	-1.09177	0.272388	-4.00812	6.12e-05	0.00159965
ENSG00000022840	RNF10	protein_coding	16524	1.39257	0.347545	4.00687	6.15e-05	0.00160604
ENSG00000124787	RPP40	protein_coding	20.6817	2.21207	0.552179	4.00607	6.17e-05	0.00160933
ENSG00000149418	ST14	protein_coding	136.039	-1.7766	0.443528	-4.00562	6.19e-05	0.0016103
ENSG00000173193	PARP14	protein_coding	1067.24	-1.14729	0.286455	-4.00514	6.2e-05	0.00161143
ENSG00000164733	CTSB	protein_coding	9556.61	1.15024	0.287317	4.00336	6.24e-05	0.00162144
ENSG00000184792	OSBP2	protein_coding	4131.21	2.24514	0.56131	3.99982	6.34e-05	0.00164374
ENSG00000143502	SUSD4	protein_coding	57.1671	1.72897	0.432299	3.99947	6.35e-05	0.001644
ENSG00000107789	MINPP1	protein_coding	115.29	1.44408	0.361198	3.99802	6.39e-05	0.0016506
ENSG00000182481	KPNA2	protein_coding	196.584	1.21469	0.303832	3.9979	6.39e-05	0.0016506
ENSG00000288771	ENSG00000288771	lncRNA	110.621	1.76207	0.44088	3.9967	6.42e-05	0.0016568
ENSG00000091513	TF	protein_coding	20.1525	3.5874	0.898151	3.99421	6.49e-05	0.00167213
ENSG00000253276	CCDC71L	protein_coding	573.579	-2.07647	0.519926	-3.99377	6.5e-05	0.00167304
ENSG00000178075	GRAMD1C	protein_coding	25.3871	-2.23582	0.56027	-3.99061	6.59e-05	0.00169328
ENSG00000099194	SCD	protein_coding	142.002	1.94656	0.487838	3.99017	6.6e-05	0.00169425
ENSG00000141084	RANBP10	protein_coding	1655.38	1.56564	0.392527	3.98861	6.65e-05	0.00170316
ENSG00000111602	TIMELESS	protein_coding	91.5538	1.26785	0.317915	3.98803	6.66e-05	0.00170514
ENSG00000101052	IFT52	protein_coding	297.853	1.37389	0.345198	3.98001	6.89e-05	0.00176144
ENSG00000160785	SLC25A44	protein_coding	1049.57	-1.70163	0.427747	-3.97813	6.95e-05	0.00177311
ENSG00000086967	MYBPC2	protein_coding	8.02011	3.44842	0.867332	3.9759	7.01e-05	0.00178586
ENSG00000143942	CHAC2	protein_coding	40.1286	1.55847	0.391988	3.97581	7.01e-05	0.00178586
ENSG00000249992	TMEM158	protein_coding	577.105	2.47457	0.62255	3.9749	7.04e-05	0.00179039
ENSG00000102934	PLLP	protein_coding	37.618	1.52084	0.382692	3.97405	7.07e-05	0.00179448
ENSG00000137752	CASP1	protein_coding	2717.69	-1.58136	0.398676	-3.96652	7.29e-05	0.00184975
ENSG00000104365	IKBKB	protein_coding	643.511	-0.693135	0.174847	-3.96423	7.36e-05	0.00186512
ENSG00000217416	ISCA1P1	processed_pseudogene	34.5874	2.7187	0.685972	3.96328	7.39e-05	0.00187021
ENSG00000235576	LINC01871	lncRNA	49.6541	-2.0729	0.523637	-3.95865	7.54e-05	0.00190439
ENSG00000159784	FAM131B	protein_coding	15.8612	-2.71252	0.685298	-3.95816	7.55e-05	0.00190584
ENSG00000101856	PGRMC1	protein_coding	430.642	-1.82706	0.461636	-3.95779	7.56e-05	0.00190637
ENSG00000257275	ENSG00000257275	lncRNA	55.321	2.32896	0.588528	3.95726	7.58e-05	0.00190813
ENSG00000204323	SMIM5	protein_coding	446.336	2.28569	0.577741	3.95625	7.61e-05	0.00191377
ENSG00000111843	TMEM14C	protein_coding	359.328	1.54022	0.389641	3.95293	7.72e-05	0.00193676
ENSG00000144036	EXOC6B	protein_coding	117.19	1.71649	0.434249	3.95279	7.72e-05	0.00193676
ENSG00000269858	EGLN2	protein_coding	287.825	-0.983793	0.248926	-3.95215	7.75e-05	0.00193942
ENSG00000130589	HELZ2	protein_coding	663.491	-1.506	0.381213	-3.95054	7.8e-05	0.00195004
ENSG00000148908	RGS10	protein_coding	2292.62	1.41255	0.357596	3.95013	7.81e-05	0.00195095
ENSG00000100320	RBFOX2	protein_coding	12.9136	2.90912	0.736701	3.94885	7.85e-05	0.00195892
ENSG00000172322	CLEC12A	protein_coding	2307.98	-1.85162	0.469036	-3.94771	7.89e-05	0.00196576
ENSG00000118564	FBXL5	protein_coding	4229.98	-1.89401	0.479974	-3.94606	7.94e-05	0.00197688
ENSG00000223552	CCR5AS	lncRNA	108.357	1.65134	0.418758	3.94344	8.03e-05	0.00199611
ENSG00000105137	SYDE1	protein_coding	56.872	7.91293	2.00751	3.94167	8.09e-05	0.00200837
ENSG00000196684	HSH2D	protein_coding	1085.73	-0.947644	0.240457	-3.94102	8.11e-05	0.00201129
ENSG00000109118	PHF12	protein_coding	963.097	-1.33512	0.339008	-3.93831	8.21e-05	0.00203155
ENSG00000235016	SEMA3F-AS1	lncRNA	26.4361	-1.68148	0.427137	-3.93663	8.26e-05	0.00204126
ENSG00000150867	PIP4K2A	protein_coding	5203.72	1.44762	0.367736	3.93656	8.27e-05	0.00204126
ENSG00000141933	TPGS1	protein_coding	186.83	2.25041	0.57172	3.93622	8.28e-05	0.00204163
ENSG00000124126	PREX1	protein_coding	4539.36	-1.77464	0.451025	-3.93468	8.33e-05	0.0020522
ENSG00000163661	PTX3	protein_coding	35.7649	2.12998	0.541822	3.93115	8.45e-05	0.00207997
ENSG00000181938	GINS3	protein_coding	22.459	1.62374	0.413106	3.93058	8.47e-05	0.00208232
ENSG00000286025	FAM246C	protein_coding	5.5045	-5.35019	1.36177	-3.92884	8.54e-05	0.00209368
ENSG00000135018	UBQLN1	protein_coding	1389.02	0.895758	0.228005	3.92867	8.54e-05	0.00209368
ENSG00000234068	PAGE2	protein_coding	11.5295	3.54137	0.901709	3.9274	8.59e-05	0.00210217
ENSG00000237977	EIF4HP2	processed_pseudogene	19.6018	2.32577	0.59269	3.9241	8.71e-05	0.00212851
ENSG00000157600	TMEM164	protein_coding	1110.48	-1.45694	0.371376	-3.92309	8.74e-05	0.00213194
ENSG00000196976	LAGE3	protein_coding	129.646	1.31524	0.335287	3.92274	8.75e-05	0.00213194
ENSG00000172936	MYD88	protein_coding	2979.67	-1.64945	0.420489	-3.9227	8.76e-05	0.00213194
ENSG00000168116	KIAA1586	protein_coding	68.9028	1.3077	0.333383	3.92252	8.76e-05	0.00213194
ENSG00000290846	ENSG00000290846	lncRNA	7.94892	5.53397	1.41101	3.92198	8.78e-05	0.00213407
ENSG00000094804	CDC6	protein_coding	30.9909	2.16949	0.554128	3.91514	9.04e-05	0.00219277
ENSG00000105369	CD79A	protein_coding	869.724	1.19815	0.306059	3.91477	9.05e-05	0.00219351
ENSG00000051341	POLQ	protein_coding	12.78	2.71979	0.69482	3.91438	9.06e-05	0.00219436
ENSG00000291173	CASP4LP	lncRNA	14.744	-2.46625	0.630281	-3.91293	9.12e-05	0.00220247
ENSG00000289401	ENSG00000289401	lncRNA	18.7966	-2.30198	0.588306	-3.91289	9.12e-05	0.00220247
ENSG00000121060	TRIM25	protein_coding	2688.21	-1.98331	0.506946	-3.91227	9.14e-05	0.00220549
ENSG00000163219	ARHGAP25	protein_coding	2841.39	-1.38684	0.354603	-3.91096	9.19e-05	0.00221474
ENSG00000249215	NCOA4P4	processed_pseudogene	29.9745	1.79082	0.458004	3.91006	9.23e-05	0.00222028
ENSG00000115649	CNPPD1	protein_coding	5720.53	1.69848	0.434619	3.90798	9.31e-05	0.0022368
ENSG00000131389	SLC6A6	protein_coding	3500.16	-1.9773	0.506035	-3.90744	9.33e-05	0.00223907
ENSG00000188153	COL4A5	protein_coding	11.5123	3.45986	0.886442	3.90308	9.5e-05	0.00227641
ENSG00000183486	MX2	protein_coding	2571.12	-1.68953	0.432897	-3.90285	9.51e-05	0.00227641
ENSG00000124766	SOX4	protein_coding	126.536	1.52312	0.390301	3.90242	9.52e-05	0.00227772
ENSG00000188486	H2AX	protein_coding	207.316	1.35449	0.347159	3.90165	9.55e-05	0.00228218
ENSG00000113810	SMC4	protein_coding	288.239	1.52891	0.392018	3.9001	9.62e-05	0.00229403
ENSG00000203867	RBM20	protein_coding	13.4508	3.16205	0.811023	3.89884	9.67e-05	0.00230323
ENSG00000132109	TRIM21	protein_coding	789.587	-1.16873	0.299855	-3.89764	9.71e-05	0.00231191
ENSG00000196188	CTSE	protein_coding	179.896	2.24793	0.577022	3.89575	9.79e-05	0.00232719
ENSG00000134323	MYCN	protein_coding	5.26031	5.68669	1.46019	3.89447	9.84e-05	0.00233664
ENSG00000257495	KRT73-AS1	lncRNA	23.5604	2.50621	0.643947	3.89196	9.94e-05	0.00235818
ENSG00000176641	RNF152	protein_coding	27.9133	3.18851	0.81949	3.89084	9.99e-05	0.00236619
ENSG00000059728	MXD1	protein_coding	7086.78	-1.97796	0.508513	-3.88969	0.00010037	0.00237461
ENSG00000156381	ANKRD9	protein_coding	776.656	2.48786	0.639667	3.8893	0.00010054	0.0023756
ENSG00000249245	NCOA4P3	processed_pseudogene	20.3374	2.08068	0.535196	3.8877	0.0001012	0.00238673
ENSG00000279253	ENSG00000279253	TEC	71.8449	-1.23997	0.318957	-3.88758	0.00010125	0.00238673
ENSG00000152990	ADGRA3	protein_coding	23.6629	2.37771	0.612265	3.88346	0.00010298	0.00242463
ENSG00000134285	FKBP11	protein_coding	173.708	-1.09672	0.282575	-3.88114	0.00010397	0.00244496
ENSG00000205639	MFSD2B	protein_coding	508.33	1.98016	0.510581	3.87825	0.00010521	0.00247129
ENSG00000268833	ENSG00000268833	lncRNA	21.9825	3.25886	0.840408	3.87771	0.00010544	0.00247381
ENSG00000154978	VOPP1	protein_coding	790.408	-0.905304	0.233529	-3.87663	0.00010591	0.00248146
ENSG00000152760	DYNLT5	protein_coding	26.0922	2.33755	0.603024	3.87638	0.00010602	0.00248146
ENSG00000114784	EIF1B	protein_coding	1489.97	1.20868	0.311917	3.875	0.00010663	0.00249262
ENSG00000070404	FSTL3	protein_coding	124.674	1.61074	0.415796	3.87388	0.00010711	0.00249908
ENSG00000236882	LINC01554	lncRNA	16.9865	2.0745	0.535523	3.87379	0.00010716	0.00249908
ENSG00000198692	EIF1AY	protein_coding	1184.87	9.41733	2.43185	3.87249	0.00010773	0.00250943
ENSG00000214021	TTLL3	protein_coding	304.455	-1.00711	0.260098	-3.87204	0.00010793	0.00251083
ENSG00000258128	MKRN9P	transcribed_processed_pseudogene	76.346	2.15375	0.556268	3.87178	0.00010804	0.00251083
ENSG00000134824	FADS2	protein_coding	126.676	1.72426	0.44543	3.871	0.00010839	0.00251599
ENSG00000270174	ENSG00000270174	lncRNA	3.92165	5.23188	1.35191	3.87	0.00010883	0.00252328
ENSG00000159217	IGF2BP1	protein_coding	6.72937	5.27747	1.36414	3.86873	0.0001094	0.00253353
ENSG00000073792	IGF2BP2	protein_coding	1789.65	2.02304	0.523322	3.86576	0.00011074	0.00255649
ENSG00000232677	LINC00665	lncRNA	87.7952	1.4177	0.366732	3.86576	0.00011075	0.00255649
ENSG00000205426	KRT81	protein_coding	26.5075	8.7505	2.26365	3.86566	0.00011079	0.00255649
ENSG00000138646	HERC5	protein_coding	255.296	-1.83652	0.475119	-3.86538	0.00011092	0.00255649
ENSG00000132465	JCHAIN	protein_coding	387.852	-1.89171	0.489496	-3.86462	0.00011126	0.00256155
ENSG00000273604	EPOP	protein_coding	18.3735	1.71233	0.443116	3.8643	0.00011141	0.0025619
ENSG00000112303	VNN2	protein_coding	14702.4	-2.09539	0.54278	-3.86047	0.00011317	0.0025993
ENSG00000117643	MAN1C1	protein_coding	285.828	1.80429	0.467585	3.85875	0.00011397	0.00261469
ENSG00000162976	SLC66A3	protein_coding	266.464	-1.08128	0.280272	-3.85795	0.00011434	0.00262013
ENSG00000236213	ENSG00000236213	lncRNA	17.0759	-2.42066	0.627521	-3.8575	0.00011455	0.00262194
ENSG00000134508	CABLES1	protein_coding	14.1096	3.40577	0.883197	3.85618	0.00011517	0.00263309
ENSG00000289300	ENSG00000289300	lncRNA	3.65112	5.86967	1.52363	3.85243	0.00011695	0.00267029
ENSG00000138160	KIF11	protein_coding	76.4075	1.60965	0.417879	3.85195	0.00011718	0.00267029
ENSG00000105656	ELL	protein_coding	729.665	-1.57697	0.409402	-3.8519	0.00011721	0.00267029
ENSG00000134830	C5AR2	protein_coding	1102.58	-1.83308	0.475986	-3.85112	0.00011758	0.0026757
ENSG00000102871	TRADD	protein_coding	393.265	-0.809301	0.210333	-3.84772	0.00011922	0.00270997
ENSG00000142910	TINAGL1	protein_coding	8.54384	5.04083	1.31203	3.842	0.00012203	0.00277066
ENSG00000152784	PRDM8	protein_coding	74.6634	-1.61247	0.419779	-3.84123	0.00012242	0.00277619
ENSG00000130508	PXDN	protein_coding	12.8808	3.35812	0.874703	3.83915	0.00012346	0.00279658
ENSG00000185559	DLK1	protein_coding	6.33753	5.17252	1.34783	3.83768	0.0001242	0.00281022
ENSG00000289514	ENSG00000289514	lncRNA	106.442	2.01075	0.524327	3.83491	0.00012561	0.00283874
ENSG00000132334	PTPRE	protein_coding	1572.19	-1.8039	0.470531	-3.83375	0.0001262	0.00284658
ENSG00000287263	ENSG00000287263	lncRNA	275.021	-0.965873	0.251945	-3.83367	0.00012624	0.00284658
ENSG00000147257	GPC3	protein_coding	59.1432	5.65758	1.47628	3.83232	0.00012694	0.00285896
ENSG00000121858	TNFSF10	protein_coding	2272.74	-1.6914	0.441436	-3.83159	0.00012732	0.00286416
ENSG00000257252	ENSG00000257252	lncRNA	12.5481	3.71463	0.969626	3.83099	0.00012763	0.00286794
ENSG00000115590	IL1R2	protein_coding	944.134	-2.25646	0.589288	-3.82913	0.0001286	0.00288636
ENSG00000243193	PRKAR2B-AS1	lncRNA	4.96181	5.58454	1.45924	3.82702	0.0001297	0.00290793
ENSG00000198680	TUSC1	protein_coding	15.2838	3.35866	0.877683	3.82673	0.00012986	0.00290805
ENSG00000189067	LITAF	protein_coding	13720.5	-1.91366	0.500306	-3.82497	0.00013079	0.00292441
ENSG00000163827	LRRC2	protein_coding	39.7582	2.82783	0.739342	3.82479	0.00013088	0.00292441
ENSG00000070081	NUCB2	protein_coding	574.374	1.34488	0.351651	3.82448	0.00013105	0.00292482
ENSG00000167747	C19orf48	transcribed_unitary_pseudogene	128.89	1.41825	0.370961	3.82318	0.00013174	0.00293692
ENSG00000181458	TMEM45A	protein_coding	15.6658	3.03836	0.794924	3.8222	0.00013227	0.00294228
ENSG00000112667	DNPH1	protein_coding	107.651	1.19713	0.313208	3.82217	0.00013228	0.00294228
ENSG00000170345	FOS	protein_coding	748.147	-2.10078	0.54968	-3.82181	0.00013247	0.00294279
ENSG00000227533	SLC2A1-DT	lncRNA	26.1425	1.88471	0.493176	3.82157	0.0001326	0.00294279
ENSG00000151883	PARP8	protein_coding	1496.43	-1.35456	0.354581	-3.82017	0.00013336	0.00295622
ENSG00000011465	DCN	protein_coding	6.16059	5.13379	1.34409	3.81954	0.0001337	0.00296054
ENSG00000062282	DGAT2	protein_coding	2156.77	-1.88498	0.493743	-3.81774	0.00013468	0.00297886
ENSG00000106211	HSPB1	protein_coding	1476.52	2.72031	0.712682	3.81701	0.00013508	0.00298264
ENSG00000139278	GLIPR1	protein_coding	1171.71	-1.41146	0.369794	-3.81687	0.00013515	0.00298264
ENSG00000125257	ABCC4	protein_coding	351.084	1.80636	0.473412	3.81561	0.00013584	0.00299451
ENSG00000149554	CHEK1	protein_coding	30.5241	1.97696	0.518185	3.81516	0.00013609	0.00299661
ENSG00000136908	DPM2	protein_coding	2228.66	1.88322	0.493883	3.81308	0.00013725	0.00301868
ENSG00000096060	FKBP5	protein_coding	2091.33	-1.64575	0.431858	-3.81086	0.00013848	0.00304247
ENSG00000069943	PIGB	protein_coding	198.914	-1.30948	0.34389	-3.80783	0.00014019	0.00307651
ENSG00000241860	ENSG00000241860	lncRNA	25.4313	-2.49316	0.654954	-3.80662	0.00014088	0.00308826
ENSG00000138778	CENPE	protein_coding	30.8572	1.83017	0.481009	3.80486	0.00014188	0.00310676
ENSG00000130177	CDC16	protein_coding	608.686	1.11263	0.292538	3.80338	0.00014273	0.00312191
ENSG00000287312	ENSG00000287312	lncRNA	10.0314	3.77447	0.99328	3.80001	0.00014469	0.00316123
ENSG00000143224	PPOX	protein_coding	404.619	1.69758	0.446859	3.79891	0.00014534	0.00316826
ENSG00000100612	DHRS7	protein_coding	1355.95	-1.31818	0.34701	-3.79868	0.00014547	0.00316826
ENSG00000136842	TMOD1	protein_coding	969.965	2.03871	0.536695	3.79864	0.0001455	0.00316826
ENSG00000185222	TCEAL9	protein_coding	41.1955	3.20662	0.84424	3.79823	0.00014573	0.00316994
ENSG00000232022	FAAHP1	transcribed_unprocessed_pseudogene	5.00833	-5.22442	1.37565	-3.79778	0.000146	0.00317214
ENSG00000139318	DUSP6	protein_coding	919.757	-1.79118	0.47179	-3.79655	0.00014672	0.00318444
ENSG00000099804	CDC34	protein_coding	6443.93	1.67694	0.442364	3.79086	0.00015012	0.00325466
ENSG00000070731	ST6GALNAC2	protein_coding	108.766	-1.96435	0.518729	-3.78686	0.00015256	0.00330102
ENSG00000206178	HBZP1	unprocessed_pseudogene	7.58594	4.978	1.31456	3.7868	0.0001526	0.00330102
ENSG00000285693	ENSG00000285693	lncRNA	98.3699	-1.66502	0.439766	-3.78616	0.00015299	0.00330593
ENSG00000057935	MTA3	protein_coding	195.307	1.50497	0.397587	3.78524	0.00015356	0.00331453
ENSG00000035664	DAPK2	protein_coding	364.943	-1.45669	0.384914	-3.78445	0.00015405	0.00331844
ENSG00000134470	IL15RA	protein_coding	61.4649	-1.37263	0.362712	-3.78436	0.00015411	0.00331844
ENSG00000004478	FKBP4	protein_coding	473.627	1.19021	0.314526	3.78413	0.00015424	0.00331844
ENSG00000115415	STAT1	protein_coding	1979.87	-0.960553	0.253885	-3.78342	0.00015469	0.00332438
ENSG00000185753	CXorf38	protein_coding	592.271	-1.1516	0.304541	-3.78141	0.00015594	0.00334761
ENSG00000226070	LINC00951	lncRNA	7.47588	3.71593	0.982824	3.78087	0.00015628	0.00334978
ENSG00000196465	MYL6B	protein_coding	62.2625	1.57806	0.417399	3.78071	0.00015638	0.00334978
ENSG00000143119	CD53	protein_coding	6567.08	-1.2605	0.333497	-3.77966	0.00015704	0.00336027
ENSG00000238005	LNCATV	lncRNA	40.7053	-2.20999	0.584783	-3.77916	0.00015736	0.00336337
ENSG00000114054	PCCB	protein_coding	178.159	0.939913	0.248744	3.77863	0.00015769	0.00336695
ENSG00000198814	GK	protein_coding	1194.17	-2.22432	0.588795	-3.77775	0.00015825	0.00337524
ENSG00000187583	PLEKHN1	protein_coding	4.05915	-4.91692	1.30181	-3.77698	0.00015874	0.00338193
ENSG00000241878	PISD	protein_coding	1204.1	-1.48913	0.394396	-3.77573	0.00015954	0.00339535
ENSG00000132274	TRIM22	protein_coding	2073.43	-1.38325	0.366537	-3.77383	0.00016076	0.00341628
ENSG00000250366	TUNAR	protein_coding	5.13786	3.91736	1.03808	3.77366	0.00016087	0.00341628
ENSG00000180539	LINC02908	lncRNA	329.186	-1.62852	0.431643	-3.77285	0.0001614	0.00342372
ENSG00000261971	MMP25-AS1	lncRNA	1475.83	-1.81417	0.481353	-3.7689	0.00016397	0.00347454
ENSG00000213468	FIRRE	lncRNA	15.3722	2.13582	0.566796	3.76824	0.0001644	0.00348003
ENSG00000166428	PLD4	protein_coding	160.417	1.85564	0.492553	3.76738	0.00016497	0.00348492
ENSG00000139926	FRMD6	protein_coding	8.27663	3.33073	0.884105	3.76735	0.00016499	0.00348492
ENSG00000235770	LINC00607	lncRNA	69.5162	4.91909	1.30624	3.76584	0.00016599	0.00350075
ENSG00000167325	RRM1	protein_coding	184.294	1.08736	0.288754	3.76568	0.00016609	0.00350075
ENSG00000162923	WDR26	protein_coding	4614.65	1.47327	0.391329	3.76478	0.00016669	0.00350375
ENSG00000169087	HSPBAP1	protein_coding	342.332	-1.10754	0.294189	-3.76471	0.00016674	0.00350375
ENSG00000099800	TIMM13	protein_coding	207.876	1.03868	0.275903	3.76467	0.00016677	0.00350375
ENSG00000197506	SLC28A3	protein_coding	25.0909	2.48249	0.659497	3.76423	0.00016707	0.00350626
ENSG00000013306	SLC25A39	protein_coding	52357.6	1.75655	0.466799	3.76298	0.0001679	0.00351925
ENSG00000197622	CDC42SE1	protein_coding	6670.54	-1.20815	0.321079	-3.76277	0.00016804	0.00351925
ENSG00000136040	PLXNC1	protein_coding	3962.5	-2.1746	0.578018	-3.76217	0.00016845	0.00352399
ENSG00000082996	RNF13	protein_coding	1090.51	-1.91647	0.509808	-3.7592	0.00017046	0.00356231
ENSG00000111859	NEDD9	protein_coding	682.97	-1.39815	0.37198	-3.75867	0.00017082	0.00356606
ENSG00000286672	ENSG00000286672	lncRNA	5.89028	3.50435	0.932649	3.75742	0.00017167	0.00357872
ENSG00000256660	CLEC12B	protein_coding	82.8047	-2.08753	0.555601	-3.75725	0.00017179	0.00357872
ENSG00000167705	RILP	protein_coding	1595.08	1.59575	0.424844	3.75609	0.00017259	0.00359157
ENSG00000206344	HCG27	lncRNA	841.754	-1.79857	0.479379	-3.75188	0.00017551	0.00364857
ENSG00000279821	ENSG00000279821	TEC	28.6502	-1.83156	0.488222	-3.75149	0.00017579	0.00365047
ENSG00000101132	PFDN4	protein_coding	35.8511	2.03975	0.543895	3.75026	0.00017665	0.00366454
ENSG00000092421	SEMA6A	protein_coding	31.141	1.77568	0.473557	3.74967	0.00017707	0.00366653
ENSG00000259144	RANBP20P	processed_pseudogene	59.1779	-1.83073	0.488247	-3.74959	0.00017712	0.00366653
ENSG00000173821	RNF213	protein_coding	2922.55	-0.963286	0.256993	-3.7483	0.00017804	0.00368103
ENSG00000156475	PPP2R2B	protein_coding	56.0535	-2.24691	0.599482	-3.74808	0.0001782	0.00368103
ENSG00000131355	ADGRE3	protein_coding	911.972	-1.83594	0.490003	-3.74679	0.00017911	0.00369602
ENSG00000197081	IGF2R	protein_coding	3737.62	-1.78375	0.47614	-3.74627	0.00017949	0.00369992
ENSG00000236956	NF1P8	unprocessed_pseudogene	8.34911	3.29577	0.879898	3.74563	0.00017994	0.00370395
ENSG00000119865	CNRIP1	protein_coding	18.7508	3.2083	0.856581	3.74547	0.00018006	0.00370395
ENSG00000112763	BTN2A1	protein_coding	792.099	-1.46818	0.392158	-3.74384	0.00018123	0.00372411
ENSG00000235532	LINC00402	lncRNA	16.886	-2.83463	0.757198	-3.74358	0.00018142	0.00372418
ENSG00000173258	ZNF483	protein_coding	15.7477	-2.6647	0.712047	-3.74231	0.00018234	0.00373911
ENSG00000181409	AATK	protein_coding	831.992	-1.84126	0.492192	-3.74093	0.00018334	0.00375582
ENSG00000185630	PBX1	protein_coding	425.392	2.00805	0.53691	3.74001	0.00018402	0.00376514
ENSG00000165626	BEND7	protein_coding	28.0498	-2.36303	0.631864	-3.73978	0.00018418	0.00376514
ENSG00000172348	RCAN2	protein_coding	9.98726	-4.09596	1.09546	-3.73902	0.00018474	0.00377263
ENSG00000229124	VIM-AS1	lncRNA	268.997	-1.58664	0.424384	-3.73868	0.00018499	0.00377384
ENSG00000196839	ADA	protein_coding	279.853	1.06692	0.285466	3.73748	0.00018588	0.00378809
ENSG00000003436	TFPI	protein_coding	46.719	2.55022	0.682605	3.73601	0.00018697	0.00380112
ENSG00000163634	THOC7	protein_coding	531.993	1.23924	0.331713	3.73589	0.00018705	0.00380112
ENSG00000171227	TMEM37	protein_coding	7.56843	4.0744	1.09063	3.73583	0.0001871	0.00380112
ENSG00000116793	PHTF1	protein_coding	239.615	-2.00092	0.535675	-3.73532	0.00018748	0.00380496
ENSG00000181381	DDX60L	protein_coding	1706.05	-1.93044	0.516977	-3.73409	0.00018839	0.00381961
ENSG00000180992	MRPL14	protein_coding	179.316	1.1915	0.319216	3.73259	0.00018952	0.0038386
ENSG00000181045	SLC26A11	protein_coding	93.9058	-1.16838	0.31315	-3.73107	0.00019067	0.00385778
ENSG00000104904	OAZ1	protein_coding	38176	1.3153	0.352565	3.73065	0.00019099	0.00386029
ENSG00000197943	PLCG2	protein_coding	174.678	-1.53945	0.412722	-3.72999	0.00019149	0.00386185
ENSG00000290720	ZNF542P	lncRNA	55.8265	1.25754	0.337143	3.72998	0.00019149	0.00386185
ENSG00000160161	CILP2	protein_coding	2.97569	5.56438	1.49188	3.72977	0.00019165	0.00386185
ENSG00000157303	SUSD3	protein_coding	304.295	1.23056	0.329965	3.72936	0.00019197	0.0038635
ENSG00000235290	HLA-W	unprocessed_pseudogene	4.71909	-5.14194	1.37885	-3.72915	0.00019213	0.0038635
ENSG00000137266	SLC22A23	protein_coding	138.718	1.80072	0.482969	3.72844	0.00019267	0.00387048
ENSG00000167103	PIP5KL1	protein_coding	24.6337	1.98606	0.533055	3.72581	0.00019469	0.0039071
ENSG00000039560	RAI14	protein_coding	80.4516	6.53016	1.75281	3.72555	0.00019489	0.00390717
ENSG00000244265	SIAH2-AS1	lncRNA	6.96579	4.22975	1.13545	3.72519	0.00019517	0.00390874
ENSG00000134690	CDCA8	protein_coding	41.1883	1.74062	0.467464	3.72354	0.00019645	0.00393034
ENSG00000158856	DMTN	protein_coding	21333.9	1.8287	0.491288	3.72226	0.00019745	0.00394636
ENSG00000183199	HSP90AB3P	processed_pseudogene	146.742	1.03363	0.277731	3.72167	0.00019791	0.0039515
ENSG00000255571	MIR9-3HG	lncRNA	28.2878	-2.44051	0.656047	-3.72003	0.0001992	0.00396621
ENSG00000185339	TCN2	protein_coding	76.4217	-2.3638	0.635435	-3.71997	0.00019924	0.00396621
ENSG00000157703	SVOPL	protein_coding	4.96801	3.76944	1.0133	3.71997	0.00019925	0.00396621
ENSG00000163162	RNF149	protein_coding	6526.99	-1.88488	0.506887	-3.71853	0.00020038	0.00398479
ENSG00000091490	SEL1L3	protein_coding	341.747	-1.02528	0.2758	-3.71748	0.00020122	0.00399742
ENSG00000164070	HSPA4L	protein_coding	6.98865	3.63964	0.979129	3.71723	0.00020142	0.00399742
ENSG00000187017	ESPN	protein_coding	1018.78	2.62078	0.705374	3.71545	0.00020284	0.00402158
ENSG00000164877	MICALL2	protein_coding	78.9091	1.76781	0.475891	3.71475	0.00020341	0.00402871
ENSG00000166169	POLL	protein_coding	1509.88	1.49192	0.401737	3.71368	0.00020427	0.00404162
ENSG00000175061	SNHG29	lncRNA	1530.76	1.13296	0.305142	3.7129	0.00020489	0.00405
ENSG00000073921	PICALM	protein_coding	4349.81	-1.57561	0.424842	-3.70871	0.00020832	0.00411356
ENSG00000129824	RPS4Y1	protein_coding	240.649	9.26169	2.49792	3.70776	0.0002091	0.0041248
ENSG00000154845	PPP4R1	protein_coding	1264.1	-1.85991	0.501662	-3.7075	0.00020932	0.00412505
ENSG00000187735	TCEA1	protein_coding	848.685	0.870053	0.234701	3.70708	0.00020967	0.00412775
ENSG00000184226	PCDH9	protein_coding	51.1319	2.12945	0.574956	3.70367	0.0002125	0.00417942
ENSG00000276136	ENSG00000276136	lncRNA	84.6506	-1.47898	0.39944	-3.70263	0.00021338	0.0041925
ENSG00000186184	POLR1D	protein_coding	3259.16	1.72879	0.46695	3.70231	0.00021365	0.0041936
ENSG00000167900	TK1	protein_coding	151.973	2.10239	0.56831	3.69937	0.00021614	0.00423668
ENSG00000144331	ZNF385B	protein_coding	9.06541	3.87842	1.04848	3.69911	0.00021636	0.00423668
ENSG00000075426	FOSL2	protein_coding	1791.99	-2.07347	0.560556	-3.69896	0.00021649	0.00423668
ENSG00000080561	MID2	protein_coding	14.4705	-3.31152	0.895583	-3.69761	0.00021764	0.00425498
ENSG00000124172	ATP5F1E	protein_coding	5916.83	1.12973	0.305577	3.69704	0.00021813	0.00425821
ENSG00000129474	AJUBA	protein_coding	17.9685	1.98289	0.536363	3.69691	0.00021824	0.00425821
ENSG00000287100	ENSG00000287100	lncRNA	41.4835	1.82634	0.494109	3.69622	0.00021883	0.00426565
ENSG00000112053	SLC26A8	protein_coding	147.317	-2.19137	0.593281	-3.69364	0.00022107	0.00430497
ENSG00000187513	GJA4	protein_coding	3.85191	5.95977	1.61393	3.69271	0.00022188	0.00431646
ENSG00000139890	REM2	protein_coding	303.88	-1.66281	0.450457	-3.69137	0.00022304	0.00433486
ENSG00000235823	OLMALINC	lncRNA	27.6209	1.71476	0.46463	3.69059	0.00022373	0.00434395
ENSG00000165572	KBTBD6	protein_coding	89.115	1.20947	0.32776	3.6901	0.00022417	0.00434806
ENSG00000183878	UTY	protein_coding	65.6662	9.3386	2.53108	3.68956	0.00022464	0.00435298
ENSG00000137834	SMAD6	protein_coding	11.5723	3.38566	0.918446	3.6863	0.00022754	0.00440489
ENSG00000111206	FOXM1	protein_coding	40.6659	1.68843	0.458242	3.68459	0.00022907	0.00443013
ENSG00000255101	ENSG00000255101	lncRNA	2.61066	5.40555	1.46813	3.68193	0.00023147	0.00447217
ENSG00000260641	TSPAN5-DT	lncRNA	78.1254	2.1053	0.572145	3.67966	0.00023355	0.00450781
ENSG00000183496	MEX3B	protein_coding	11.6303	2.68974	0.731158	3.67874	0.00023439	0.00451966
ENSG00000179403	VWA1	protein_coding	8.41546	6.3418	1.72406	3.67841	0.00023469	0.0045211
ENSG00000171033	PKIA	protein_coding	119.172	1.53538	0.417473	3.67781	0.00023525	0.00452738
ENSG00000198937	CCDC167	protein_coding	102.057	1.3714	0.372945	3.67721	0.00023579	0.00453346
ENSG00000172380	GNG12	protein_coding	63.1098	5.84184	1.58903	3.67636	0.00023658	0.00454345
ENSG00000264920	SP2-DT	lncRNA	35.0199	1.61734	0.439954	3.67616	0.00023677	0.00454345
ENSG00000166900	STX3	protein_coding	1949.79	-1.81362	0.493408	-3.67571	0.00023719	0.00454705
ENSG00000147400	CETN2	protein_coding	332.7	1.06051	0.288638	3.67419	0.0002386	0.00456954
ENSG00000185561	TLCD2	protein_coding	16.7415	2.48368	0.676024	3.67395	0.00023883	0.00456954
ENSG00000124701	APOBEC2	protein_coding	25.4227	1.63836	0.446018	3.67331	0.00023943	0.00457655
ENSG00000163412	EIF4E3	protein_coding	1273.7	-1.8035	0.491231	-3.67139	0.00024123	0.00460652
ENSG00000118193	KIF14	protein_coding	14.1062	3.10235	0.845513	3.66919	0.00024332	0.00463788
ENSG00000197646	PDCD1LG2	protein_coding	12.7939	-3.29584	0.898253	-3.66917	0.00024334	0.00463788
ENSG00000146828	SLC12A9	protein_coding	2952.29	-1.60312	0.437006	-3.66842	0.00024406	0.0046441
ENSG00000185745	IFIT1	protein_coding	438.98	-1.83813	0.50108	-3.66833	0.00024414	0.0046441
ENSG00000148926	ADM	protein_coding	901.793	-1.94416	0.530095	-3.66758	0.00024486	0.00465329
ENSG00000173918	C1QTNF1	protein_coding	22.1531	7.05592	1.92587	3.66376	0.00024854	0.00471772
ENSG00000160191	PDE9A	protein_coding	32.6493	2.21217	0.603838	3.66352	0.00024877	0.00471772
ENSG00000132964	CDK8	protein_coding	183.588	1.5346	0.418934	3.6631	0.00024918	0.00471772
ENSG00000150337	FCGR1A	protein_coding	1089.65	-2.23298	0.609593	-3.66307	0.00024921	0.00471772
ENSG00000132541	RIDA	protein_coding	109.245	2.32745	0.635612	3.66175	0.00025049	0.00473753
ENSG00000080573	COL5A3	protein_coding	26.9091	-3.98129	1.08802	-3.6592	0.000253	0.00478034
ENSG00000229093	OR51AB1P	unprocessed_pseudogene	10.4209	2.46863	0.675059	3.65691	0.00025527	0.00481859
ENSG00000230615	ENSG00000230615	lncRNA	246.394	1.66882	0.456534	3.65541	0.00025677	0.0048422
ENSG00000161643	SIGLEC16	protein_coding	26.8252	-1.93824	0.530352	-3.65462	0.00025756	0.00485258
ENSG00000130638	ATXN10	protein_coding	490.68	0.871104	0.238439	3.65336	0.00025883	0.00487177
ENSG00000139517	LNX2	protein_coding	148.017	1.4697	0.402595	3.65057	0.00026165	0.00492026
ENSG00000136869	TLR4	protein_coding	2779.2	-2.24828	0.615992	-3.64986	0.00026238	0.00492658
ENSG00000084112	SSH1	protein_coding	535.604	-1.64018	0.449395	-3.64975	0.00026249	0.00492658
ENSG00000213906	LTB4R2	protein_coding	35.0247	-1.60993	0.441154	-3.64935	0.0002629	0.00492752
ENSG00000163840	DTX3L	protein_coding	1011.79	-1.1093	0.303984	-3.64922	0.00026304	0.00492752
ENSG00000174485	DENND4A	protein_coding	629.176	0.90776	0.248869	3.64754	0.00026476	0.0049551
ENSG00000166501	PRKCB	protein_coding	2490.5	-1.11403	0.30579	-3.64312	0.00026936	0.00503624
ENSG00000158321	AUTS2	protein_coding	128.352	1.7686	0.485625	3.64191	0.00027062	0.00505507
ENSG00000172901	LVRN	protein_coding	5.46311	4.91629	1.3504	3.64062	0.00027198	0.00507572
ENSG00000152782	PANK1	protein_coding	9.97441	2.42042	0.665105	3.63916	0.00027353	0.00509981
ENSG00000176014	TUBB6	protein_coding	130.298	1.76068	0.484206	3.63621	0.00027668	0.00515025
ENSG00000123453	SARDH	protein_coding	73.8992	2.26941	0.624126	3.63613	0.00027676	0.00515025
ENSG00000285557	ENSG00000285557	lncRNA	5.48198	3.89353	1.07086	3.63589	0.00027702	0.00515025
ENSG00000102384	CENPI	protein_coding	14.356	2.03184	0.558918	3.63531	0.00027765	0.00515279
ENSG00000165209	STRBP	protein_coding	174.952	1.0962	0.301545	3.63528	0.00027768	0.00515279
ENSG00000204267	TAP2	protein_coding	450.559	-1.1345	0.312212	-3.63374	0.00027934	0.00517865
ENSG00000106714	CNTNAP3	protein_coding	498.375	-2.58669	0.711938	-3.63331	0.00027981	0.00518252
ENSG00000213088	ACKR1	protein_coding	146.468	1.87091	0.515205	3.63139	0.0002819	0.00520729
ENSG00000143321	HDGF	protein_coding	7338.92	1.40342	0.386482	3.63126	0.00028204	0.00520729
ENSG00000042753	AP2S1	protein_coding	1385.86	1.28404	0.353617	3.63116	0.00028215	0.00520729
ENSG00000229425	ENSG00000229425	lncRNA	7.38093	3.43639	0.946374	3.63111	0.0002822	0.00520729
ENSG00000284526	ENSG00000284526	protein_coding	23.067	-2.4389	0.671783	-3.63048	0.00028289	0.00521513
ENSG00000177425	PAWR	protein_coding	53.6755	1.63194	0.449591	3.62983	0.00028361	0.00521955
ENSG00000005020	SKAP2	protein_coding	1808.55	-1.8591	0.51218	-3.62978	0.00028366	0.00521955
ENSG00000162063	CCNF	protein_coding	54.324	1.92881	0.532314	3.62345	0.0002907	0.0053424
ENSG00000169583	CLIC3	protein_coding	399.278	2.88612	0.796547	3.62329	0.00029088	0.0053424
ENSG00000237643	LINC01610	lncRNA	4.51411	5.42256	1.49683	3.62269	0.00029156	0.00534984
ENSG00000204592	HLA-E	protein_coding	40975.8	-1.21311	0.334975	-3.6215	0.0002929	0.00536938
ENSG00000172243	CLEC7A	protein_coding	1751.6	-1.8103	0.500066	-3.62012	0.00029447	0.00539319
ENSG00000254995	STX16-NPEPL1	protein_coding	32.2788	-1.71965	0.475424	-3.61708	0.00029794	0.00545061
ENSG00000160013	PTGIR	protein_coding	213.098	1.27329	0.35204	3.6169	0.00029816	0.00545061
ENSG00000163421	PROK2	protein_coding	7235.26	-2.71887	0.752418	-3.61352	0.00030207	0.0055123
ENSG00000153561	RMND5A	protein_coding	1542.34	0.980196	0.271259	3.6135	0.00030209	0.0055123
ENSG00000165449	SLC16A9	protein_coding	2.83029	5.52767	1.53015	3.6125	0.00030326	0.00552564
ENSG00000060237	WNK1	protein_coding	3800.96	1.43301	0.396693	3.6124	0.00030338	0.00552564
ENSG00000174130	TLR6	protein_coding	1093.35	-1.81055	0.501274	-3.6119	0.00030396	0.00553103
ENSG00000115163	CENPA	protein_coding	14.8694	2.69761	0.74704	3.61106	0.00030495	0.00554388
ENSG00000185920	PTCH1	protein_coding	53.0791	-1.76501	0.489008	-3.60937	0.00030694	0.00557055
ENSG00000091592	NLRP1	protein_coding	1879.74	-0.950911	0.263458	-3.60934	0.00030698	0.00557055
ENSG00000174358	SLC6A19	protein_coding	63.248	4.90679	1.35972	3.60867	0.00030777	0.0055798
ENSG00000163563	MNDA	protein_coding	22488.2	-1.69071	0.468676	-3.60741	0.00030927	0.00560184
ENSG00000183032	SLC25A21	protein_coding	3.21641	4.94824	1.37314	3.6036	0.00031384	0.00567938
ENSG00000197403	OR6N1	protein_coding	5.78495	4.03029	1.11853	3.6032	0.00031433	0.00567964
ENSG00000175711	B3GNTL1	protein_coding	232.778	-1.55817	0.432452	-3.60311	0.00031443	0.00567964
ENSG00000198909	MAP3K3	protein_coding	1443.22	-1.44398	0.400923	-3.60163	0.00031623	0.00570685
ENSG00000287926	ENSG00000287926	lncRNA	13.3391	-3.36702	0.935547	-3.59898	0.00031947	0.00575935
ENSG00000157551	KCNJ15	protein_coding	3830.14	-2.15469	0.598823	-3.59821	0.00032042	0.00575935
ENSG00000073150	PANX2	protein_coding	203.371	-2.18804	0.608099	-3.59816	0.00032047	0.00575935
ENSG00000073712	FERMT2	protein_coding	16.6622	3.9876	1.10823	3.59816	0.00032048	0.00575935
ENSG00000262580	ENSG00000262580	lncRNA	81.7383	-1.27532	0.354456	-3.59797	0.00032071	0.00575935
ENSG00000177732	SOX12	protein_coding	135.219	1.26691	0.352131	3.59782	0.00032089	0.00575935
ENSG00000166226	CCT2	protein_coding	651.908	1.04298	0.289938	3.59725	0.0003216	0.00576678
ENSG00000197753	LHFPL5	protein_coding	62.9894	-1.972	0.548395	-3.59594	0.00032322	0.0057906
ENSG00000249884	RNF103-CHMP3	protein_coding	7.77517	2.65743	0.739336	3.59435	0.0003252	0.0058209
ENSG00000286555	ENSG00000286555	lncRNA	73.6262	-1.5591	0.433836	-3.59374	0.00032596	0.00582917
ENSG00000111341	MGP	protein_coding	8.9336	2.47208	0.688008	3.59309	0.00032678	0.00583844
ENSG00000040275	SPDL1	protein_coding	53.8183	1.2204	0.339681	3.59278	0.00032717	0.00584013
ENSG00000132155	RAF1	protein_coding	1187.76	-1.45163	0.40411	-3.59216	0.00032795	0.00584799
ENSG00000251158	ENSG00000251158	unprocessed_pseudogene	20.3032	-3.23901	0.901758	-3.59188	0.0003283	0.00584799
ENSG00000115339	GALNT3	protein_coding	368.657	-1.90083	0.529224	-3.59172	0.0003285	0.00584799
ENSG00000124440	HIF3A	protein_coding	21.2761	6.45163	1.79676	3.59069	0.0003298	0.00586592
ENSG00000198176	TFDP1	protein_coding	1729.03	1.45685	0.405953	3.5887	0.00033233	0.00590548
ENSG00000120709	FAM53C	protein_coding	1470.68	-1.56991	0.437722	-3.58654	0.00033509	0.00594928
ENSG00000076003	MCM6	protein_coding	299.82	1.09638	0.305718	3.58625	0.00033547	0.00595058
ENSG00000154839	SKA1	protein_coding	18.9216	2.13774	0.596474	3.58396	0.00033843	0.00599763
ENSG00000167302	TEPSIN	protein_coding	207.987	-0.951921	0.265635	-3.58357	0.00033893	0.00600109
ENSG00000125735	TNFSF14	protein_coding	794.521	-1.64285	0.458883	-3.58011	0.00034345	0.00607574
ENSG00000142864	SERBP1	protein_coding	2261.79	0.66122	0.184779	3.57844	0.00034565	0.00610439
ENSG00000159882	ZNF230	protein_coding	153.849	-1.99449	0.557377	-3.57835	0.00034576	0.00610439
ENSG00000289976	ENSG00000289976	lncRNA	9.54152	2.92233	0.816725	3.57811	0.00034609	0.00610439
ENSG00000174792	ODAPH	protein_coding	5.21133	6.38985	1.7859	3.57794	0.00034631	0.00610439
ENSG00000148660	CAMK2G	protein_coding	1025.36	-0.97838	0.273473	-3.57762	0.00034674	0.00610653
ENSG00000105711	SCN1B	protein_coding	68.7303	-2.24426	0.627539	-3.57628	0.00034851	0.00613226
ENSG00000102098	SCML2	protein_coding	11.2868	2.32236	0.649458	3.57585	0.00034909	0.00613702
ENSG00000183765	CHEK2	protein_coding	53.8441	1.18812	0.332299	3.57544	0.00034964	0.00614107
ENSG00000119326	CTNNAL1	protein_coding	199.875	1.71539	0.480104	3.57296	0.00035297	0.00618907
ENSG00000108950	FAM20A	protein_coding	19.266	-2.79017	0.780918	-3.57294	0.000353	0.00618907
ENSG00000187775	DNAH17	protein_coding	439.897	-1.73762	0.486525	-3.5715	0.00035495	0.00621769
ENSG00000143158	MPC2	protein_coding	312.772	1.14587	0.320934	3.57043	0.00035639	0.00623746
ENSG00000137198	GMPR	protein_coding	4439.42	1.927	0.539779	3.56998	0.00035701	0.00623873
ENSG00000171714	ANO5	protein_coding	6.35831	-4.09923	1.14827	-3.56992	0.0003571	0.00623873
ENSG00000150687	PRSS23	protein_coding	90.5212	-1.81077	0.507318	-3.56931	0.00035793	0.00624769
ENSG00000167483	NIBAN3	protein_coding	487.6	1.11489	0.312502	3.56763	0.00036023	0.00628227
ENSG00000169738	DCXR	protein_coding	343.505	1.41738	0.397383	3.56679	0.00036138	0.0062969
ENSG00000188011	RTP5	protein_coding	10.5761	-3.7673	1.05691	-3.56444	0.00036463	0.00634787
ENSG00000272933	TRIM8-DT	lncRNA	146.154	-1.66321	0.466766	-3.56326	0.00036628	0.00636918
ENSG00000126583	PRKCG	protein_coding	4.96628	3.45079	0.96848	3.5631	0.0003665	0.00636918
ENSG00000284753	EEF1AKMT4	protein_coding	12.9026	2.11754	0.594612	3.56121	0.00036916	0.00640812
ENSG00000186834	HEXIM1	protein_coding	1014.89	1.03181	0.289751	3.56104	0.00036939	0.00640812
ENSG00000023734	STRAP	protein_coding	756.64	0.849722	0.238718	3.55952	0.00037153	0.00643318
ENSG00000126262	FFAR2	protein_coding	3750.64	-2.02937	0.570129	-3.5595	0.00037156	0.00643318
ENSG00000274070	CASTOR2	protein_coding	212.36	1.43202	0.402329	3.55932	0.00037182	0.00643318
ENSG00000174125	TLR1	protein_coding	1384.99	-1.85847	0.522181	-3.55906	0.00037218	0.00643381
ENSG00000147394	ZNF185	protein_coding	563.74	-2.12846	0.598378	-3.55705	0.00037505	0.00647769
ENSG00000291033	TXLNGY	lncRNA	43.8341	8.75625	2.46451	3.55294	0.00038096	0.006574
ENSG00000127954	STEAP4	protein_coding	3069.48	-2.01906	0.568364	-3.5524	0.00038173	0.00658159
ENSG00000119138	KLF9	protein_coding	100.391	-1.33023	0.374489	-3.55212	0.00038214	0.00658288
ENSG00000131238	PPT1	protein_coding	3683	-1.38893	0.39118	-3.55062	0.00038432	0.00661465
ENSG00000135899	SP110	protein_coding	1685.84	-1.2448	0.350641	-3.55006	0.00038514	0.00662297
ENSG00000119714	GPR68	protein_coding	95.7769	-1.29879	0.365907	-3.54952	0.00038594	0.00663092
ENSG00000203710	CR1	protein_coding	2366.05	-2.15818	0.608143	-3.5488	0.00038699	0.00664313
ENSG00000147894	C9orf72	protein_coding	603.438	-1.83803	0.518029	-3.54811	0.000388	0.00665477
ENSG00000152969	JAKMIP1	protein_coding	7.336	-3.63839	1.02608	-3.54591	0.00039126	0.00670481
ENSG00000172179	PRL	protein_coding	6.46904	3.36542	0.949284	3.54521	0.0003923	0.0067164
ENSG00000131370	SH3BP5	protein_coding	165.545	-1.44911	0.408775	-3.545	0.00039262	0.0067164
ENSG00000100298	APOBEC3H	protein_coding	23.9235	-1.87061	0.527767	-3.54437	0.00039355	0.00672645
ENSG00000137942	FNBP1L	protein_coding	52.1534	1.8438	0.52055	3.54203	0.00039706	0.0067802
ENSG00000101596	SMCHD1	protein_coding	3352.47	-1.62806	0.459669	-3.54182	0.00039738	0.0067802
ENSG00000137393	RNF144B	protein_coding	525.516	-1.4991	0.423296	-3.5415	0.00039785	0.00678243
ENSG00000160957	RECQL4	protein_coding	52.0906	1.45954	0.412233	3.54057	0.00039927	0.00679955
ENSG00000243646	IL10RB	protein_coding	91.2962	-1.66062	0.469059	-3.54033	0.00039963	0.00679955
ENSG00000173281	PPP1R3B	protein_coding	1891.39	-1.97723	0.558516	-3.54015	0.00039989	0.00679955
ENSG00000173757	STAT5B	protein_coding	4727.15	-1.42789	0.403452	-3.53919	0.00040136	0.0068186
ENSG00000119969	HELLS	protein_coding	46.1765	1.2801	0.361788	3.53826	0.00040277	0.00683662
ENSG00000286330	ENSG00000286330	lncRNA	11.6679	-3.00236	0.848842	-3.537	0.0004047	0.00686347
ENSG00000008283	CYB561	protein_coding	128.198	-1.5693	0.443884	-3.53538	0.00040719	0.00689987
ENSG00000066056	TIE1	protein_coding	11.5904	2.49519	0.706157	3.53348	0.00041013	0.00693814
ENSG00000088882	CPXM1	protein_coding	19.4934	3.78896	1.07231	3.53346	0.00041016	0.00693814
ENSG00000288015	ENSG00000288015	lncRNA	3.09487	4.89133	1.38465	3.53255	0.00041157	0.00695375
ENSG00000251393	ENSG00000251393	lncRNA	27.4009	-2.53879	0.718778	-3.5321	0.00041227	0.00695375
ENSG00000165801	ARHGEF40	protein_coding	1154.9	-2.25535	0.638555	-3.53195	0.0004125	0.00695375
ENSG00000187764	SEMA4D	protein_coding	2433.83	-1.06334	0.301063	-3.53194	0.00041252	0.00695375
ENSG00000177706	FAM20C	protein_coding	87.4389	-2.03059	0.574956	-3.53174	0.00041284	0.00695375
ENSG00000289731	FAM153B	lncRNA	23.1283	-3.14946	0.891834	-3.53144	0.0004133	0.00695559
ENSG00000151474	FRMD4A	protein_coding	183.611	1.46043	0.413603	3.531	0.00041399	0.00696125
ENSG00000089159	PXN	protein_coding	2576.75	-1.51403	0.428863	-3.53034	0.00041503	0.00697264
ENSG00000004897	CDC27	protein_coding	571.077	1.04588	0.29631	3.52967	0.00041608	0.0069844
ENSG00000113719	ERGIC1	protein_coding	2831.92	-1.77873	0.503999	-3.52923	0.00041677	0.00698996
ENSG00000166130	IKBIP	protein_coding	371.465	-1.70295	0.482609	-3.52863	0.00041772	0.00699998
ENSG00000189238	LINC00943	lncRNA	5.25241	-4.50711	1.27762	-3.52775	0.00041911	0.0070173
ENSG00000267366	ENSG00000267366	lncRNA	12.0065	2.44113	0.69205	3.52738	0.00041969	0.00702105
ENSG00000228956	SATB1-AS1	lncRNA	144.16	1.44708	0.410522	3.52497	0.00042353	0.00707938
ENSG00000157734	SNX22	protein_coding	124.824	1.19672	0.339573	3.52418	0.0004248	0.00709095
ENSG00000099725	PRKY	transcribed_unitary_pseudogene	81.239	7.97805	2.26386	3.52409	0.00042495	0.00709095
ENSG00000141506	PIK3R5	protein_coding	1959.78	-1.11338	0.316004	-3.5233	0.00042621	0.00710159
ENSG00000160961	ZNF333	protein_coding	241.362	-1.32866	0.377114	-3.52324	0.0004263	0.00710159
ENSG00000103569	AQP9	protein_coding	12356.6	-2.09636	0.59519	-3.52216	0.00042805	0.00712459
ENSG00000163171	CDC42EP3	protein_coding	1502.47	-1.68549	0.478729	-3.52076	0.00043031	0.00715629
ENSG00000005102	MEOX1	protein_coding	40.9362	1.98395	0.563571	3.52032	0.00043103	0.0071622
ENSG00000203999	LINC01270	lncRNA	127.443	-2.03901	0.579311	-3.51971	0.00043201	0.00717241
ENSG00000124788	ATXN1	protein_coding	584.521	-1.41981	0.40346	-3.51909	0.00043303	0.00718328
ENSG00000286067	ENSG00000286067	lncRNA	139.559	-1.73601	0.493432	-3.51824	0.00043442	0.00720021
ENSG00000145247	OCIAD2	protein_coding	215.8	1.45824	0.414526	3.51786	0.00043504	0.00720455
ENSG00000234745	HLA-B	protein_coding	39456.2	-1.24893	0.355053	-3.51759	0.00043549	0.00720586
ENSG00000105281	SLC1A5	protein_coding	1544.7	1.69556	0.482123	3.51687	0.00043666	0.00721923
ENSG00000105810	CDK6	protein_coding	296.901	1.04881	0.298369	3.51513	0.00043954	0.00726069
ENSG00000180573	H2AC6	protein_coding	2486.19	-1.81186	0.51563	-3.51388	0.00044161	0.0072888
ENSG00000173457	PPP1R14B	protein_coding	269.331	2.08352	0.593025	3.51338	0.00044244	0.00729643
ENSG00000133063	CHIT1	protein_coding	104.17	2.8081	0.799323	3.51309	0.00044293	0.00729827
ENSG00000110315	RNF141	protein_coding	1112.92	-1.74259	0.496076	-3.51274	0.00044352	0.00729846
ENSG00000150961	SEC24D	protein_coding	273.361	-1.32971	0.378549	-3.51264	0.00044368	0.00729846
ENSG00000100897	DCAF11	protein_coding	1927.18	1.05352	0.299996	3.51177	0.00044513	0.00731627
ENSG00000154928	EPHB1	protein_coding	63.4716	-2.09852	0.598079	-3.50877	0.00045018	0.00738735
ENSG00000066294	CD84	protein_coding	351.263	-1.47921	0.421578	-3.50876	0.00045021	0.00738735
ENSG00000139329	LUM	protein_coding	2.466	5.29753	1.50994	3.50844	0.00045074	0.00738998
ENSG00000173992	CCS	protein_coding	434.479	1.1699	0.333484	3.50813	0.00045127	0.00739005
ENSG00000188897	ENSG00000188897	protein_coding	750.616	-1.73207	0.493749	-3.508	0.0004515	0.00739005
ENSG00000215114	UBXN2B	protein_coding	1238.96	-1.74138	0.496538	-3.50705	0.0004531	0.00741021
ENSG00000182541	LIMK2	protein_coding	3446.48	-1.68969	0.481923	-3.50614	0.00045465	0.00742813
ENSG00000165912	PACSIN3	protein_coding	44.9901	6.00669	1.71328	3.50597	0.00045495	0.00742813
ENSG00000164611	PTTG1	protein_coding	165.484	2.17843	0.621418	3.50558	0.00045561	0.00743273
ENSG00000010295	IFFO1	protein_coding	378.674	-0.778738	0.222448	-3.50076	0.00046394	0.0075623
ENSG00000124201	ZNFX1	protein_coding	1275.53	-1.14198	0.326281	-3.49999	0.00046527	0.00757498
ENSG00000128383	APOBEC3A	protein_coding	2239.26	-1.96803	0.562315	-3.49987	0.00046548	0.00757498
ENSG00000137216	TMEM63B	protein_coding	733.239	1.56941	0.448542	3.49892	0.00046714	0.00759563
ENSG00000134571	MYBPC3	protein_coding	111.507	-1.74067	0.497607	-3.49808	0.00046862	0.00761347
ENSG00000182022	CHST15	protein_coding	2141.28	-2.02813	0.579889	-3.49745	0.00046973	0.00762175
ENSG00000054654	SYNE2	protein_coding	583.244	-1.02641	0.293482	-3.49735	0.00046991	0.00762175
ENSG00000172057	ORMDL3	protein_coding	1833.36	1.12441	0.321528	3.49709	0.00047036	0.0076229
ENSG00000137462	TLR2	protein_coding	2982.69	-1.93449	0.553279	-3.49641	0.00047157	0.00763615
ENSG00000129195	PIMREG	protein_coding	5.96487	3.98928	1.14174	3.49403	0.00047578	0.00769802
ENSG00000165349	SLC7A3	protein_coding	5.81286	3.40851	0.975605	3.49374	0.00047631	0.0077003
ENSG00000253931	LINC02990	lncRNA	2.96229	4.85798	1.39075	3.49306	0.00047751	0.00771343
ENSG00000070413	DGCR2	protein_coding	1058.03	-1.09751	0.314376	-3.49108	0.00048107	0.00776442
ENSG00000168646	AXIN2	protein_coding	81.8372	1.90003	0.544385	3.49024	0.00048259	0.00778265
ENSG00000188282	RUFY4	protein_coding	9.94252	-2.70802	0.77613	-3.48913	0.0004846	0.0078086
ENSG00000154122	ANKH	protein_coding	2375.99	1.68216	0.482169	3.48873	0.00048532	0.00781393
ENSG00000249437	NAIP	protein_coding	415.58	-2.30899	0.661943	-3.4882	0.00048628	0.00782301
ENSG00000004809	SLC22A16	protein_coding	57.4348	1.81187	0.519519	3.4876	0.00048738	0.00783429
ENSG00000259803	SLC22A31	protein_coding	4.42893	4.62292	1.32579	3.48691	0.00048864	0.0078481
ENSG00000133816	MICAL2	protein_coding	3435.72	1.23334	0.353791	3.48607	0.00049017	0.00786629
ENSG00000120129	DUSP1	protein_coding	2573.2	-1.62575	0.466492	-3.48504	0.00049206	0.0078901
ENSG00000153179	RASSF3	protein_coding	2880.87	-1.5181	0.435872	-3.48291	0.00049599	0.00794667
ENSG00000172197	MBOAT1	protein_coding	312.672	-1.56847	0.450423	-3.48221	0.00049729	0.00796109
ENSG00000153207	AHCTF1	protein_coding	704.99	-1.42916	0.410455	-3.4819	0.00049788	0.00796404
ENSG00000257878	ENSG00000257878	lncRNA	34.0098	-2.54095	0.729967	-3.48092	0.0004997	0.00798671
ENSG00000100206	DMC1	protein_coding	3.04253	4.91928	1.41335	3.48059	0.00050032	0.00799009
ENSG00000204832	ST8SIA6-AS1	lncRNA	15.1578	4.3415	1.24761	3.47985	0.00050169	0.00800547
ENSG00000167995	BEST1	protein_coding	508.108	-1.9888	0.571581	-3.47947	0.0005024	0.00801037
ENSG00000018408	WWTR1	protein_coding	27.1321	2.52845	0.727083	3.47752	0.00050608	0.00806245
ENSG00000148400	NOTCH1	protein_coding	1341.17	-1.48064	0.425805	-3.47727	0.00050655	0.00806347
ENSG00000230037	UBBP1	processed_pseudogene	48.5857	1.66872	0.479993	3.47656	0.0005079	0.00807836
ENSG00000136573	BLK	protein_coding	175.243	0.967844	0.278412	3.47631	0.00050837	0.00807943
ENSG00000254087	LYN	protein_coding	6182.97	-1.82568	0.52532	-3.47537	0.00051015	0.00810109
ENSG00000169679	BUB1	protein_coding	44.4085	1.71855	0.494577	3.47479	0.00051126	0.00811077
ENSG00000142731	PLK4	protein_coding	28.0381	1.8893	0.543744	3.47462	0.00051158	0.00811077
ENSG00000124098	FAM210B	protein_coding	17537.6	1.93047	0.555629	3.47438	0.00051203	0.00811136
ENSG00000169252	ADRB2	protein_coding	155.068	-0.96699	0.278391	-3.4735	0.00051372	0.00813166
ENSG00000197993	KEL	protein_coding	417.123	1.9109	0.550225	3.47294	0.00051479	0.00813794
ENSG00000239672	NME1	protein_coding	45.7376	1.29753	0.37362	3.47286	0.00051494	0.00813794
ENSG00000219133	ENSG00000219133	processed_pseudogene	6.73006	2.84818	0.820446	3.47151	0.00051755	0.00817252
ENSG00000168062	BATF2	protein_coding	32.0068	-2.36137	0.680322	-3.47095	0.00051862	0.00818284
ENSG00000237172	B3GNT9	protein_coding	25.118	-1.82182	0.525012	-3.47004	0.00052037	0.00820399
ENSG00000113368	LMNB1	protein_coding	2594.18	-2.15323	0.620604	-3.46958	0.00052128	0.00821054
ENSG00000163565	IFI16	protein_coding	3858.85	-1.46475	0.42219	-3.4694	0.00052162	0.00821054
ENSG00000135828	RNASEL	protein_coding	495.083	-1.51098	0.435588	-3.46883	0.00052273	0.00822137
ENSG00000204160	ZDHHC18	protein_coding	4664.18	-1.60547	0.462868	-3.46852	0.00052333	0.00822424
ENSG00000140455	USP3	protein_coding	698.698	-0.996291	0.287353	-3.46713	0.00052605	0.00826049
ENSG00000243156	MICAL3	protein_coding	100.039	1.44704	0.417449	3.4664	0.00052749	0.00827643
ENSG00000224834	BTF3P9	processed_pseudogene	47.747	1.56274	0.450863	3.46612	0.00052803	0.00827839
ENSG00000087157	PGS1	protein_coding	1484.08	-1.78609	0.515632	-3.46389	0.00053242	0.0083406
ENSG00000154027	AK5	protein_coding	110.089	1.92473	0.555721	3.46349	0.00053321	0.0083463
ENSG00000127951	FGL2	protein_coding	4000.68	-1.5902	0.459174	-3.46318	0.00053383	0.00834935
ENSG00000140264	SERF2	protein_coding	5858.3	1.1615	0.335777	3.45916	0.00054187	0.00846836
ENSG00000249669	CARMN	lncRNA	2.45849	5.34057	1.54483	3.45707	0.00054608	0.00852516
ENSG00000178860	MSC	protein_coding	21.9574	-2.52613	0.730745	-3.45693	0.00054637	0.00852516
ENSG00000156273	BACH1	protein_coding	1722.55	-1.76704	0.511311	-3.4559	0.00054846	0.00855097
ENSG00000143365	RORC	protein_coding	34.0966	-2.2186	0.642204	-3.45467	0.00055097	0.00858334
ENSG00000196668	LINC00173	lncRNA	83.254	-1.94271	0.56256	-3.45335	0.00055368	0.00861871
ENSG00000198478	SH3BGRL2	protein_coding	325.345	-1.64494	0.476439	-3.45257	0.00055527	0.00863649
ENSG00000262898	ENSG00000262898	lncRNA	5.83059	3.18135	0.921504	3.45234	0.00055574	0.00863649
ENSG00000146918	NCAPG2	protein_coding	83.9438	1.32802	0.384693	3.45215	0.00055613	0.00863649
ENSG00000166341	DCHS1	protein_coding	75.8135	1.63843	0.474702	3.45149	0.0005575	0.00865098
ENSG00000181788	SIAH2	protein_coding	4318.73	1.77275	0.513768	3.45049	0.00055957	0.00867627
ENSG00000134326	CMPK2	protein_coding	237.051	1.53878	0.44611	3.44933	0.00056198	0.00870677
ENSG00000128040	SPINK2	protein_coding	15.9534	2.76579	0.802066	3.44834	0.00056405	0.00873197
ENSG00000155090	KLF10	protein_coding	262.841	-1.37917	0.400434	-3.44419	0.00057278	0.00886011
ENSG00000181104	F2R	protein_coding	105.668	-1.36348	0.39591	-3.44391	0.00057337	0.00886229
ENSG00000272501	ENSG00000272501	lncRNA	251.487	-1.5395	0.447049	-3.44369	0.00057383	0.00886248
ENSG00000164816	DEFA5	protein_coding	4.75847	6.24846	1.8151	3.44248	0.0005764	0.0088951
ENSG00000134548	SPX	protein_coding	15.3922	-2.93529	0.852973	-3.44124	0.00057904	0.00892898
ENSG00000177030	DEAF1	protein_coding	220.711	0.820099	0.238383	3.44025	0.00058117	0.00895473
ENSG00000172922	RNASEH2C	protein_coding	498.204	1.0951	0.318606	3.43716	0.00058785	0.00905053
ENSG00000270426	ENSG00000270426	lncRNA	13.4404	-2.71004	0.788515	-3.43689	0.00058843	0.00905242
ENSG00000155093	PTPRN2	protein_coding	144.515	-1.63521	0.476016	-3.4352	0.00059212	0.00910208
ENSG00000289089	ENSG00000289089	lncRNA	4.36416	6.13118	1.78571	3.43347	0.00059591	0.00915322
ENSG00000266397	ENSG00000266397	lncRNA	2.50344	5.32769	1.55187	3.43308	0.00059676	0.00915915
ENSG00000188375	H3-5	protein_coding	307.073	-1.8002	0.524423	-3.43271	0.00059757	0.00916442
ENSG00000155659	VSIG4	protein_coding	65.0219	-2.56799	0.748139	-3.4325	0.00059803	0.00916442
ENSG00000108106	UBE2S	protein_coding	285.417	1.25457	0.365623	3.43133	0.00060062	0.00919698
ENSG00000134709	HOOK1	protein_coding	66.744	1.96158	0.571936	3.42973	0.00060419	0.00923698
ENSG00000101003	GINS1	protein_coding	24.8163	1.61374	0.470527	3.42965	0.00060437	0.00923698
ENSG00000048462	TNFRSF17	protein_coding	11.4338	-2.57714	0.751456	-3.42952	0.00060464	0.00923698
ENSG00000277978	ENSG00000277978	lncRNA	74.7179	-1.6367	0.477303	-3.42906	0.00060567	0.00924553
ENSG00000011590	ZBTB32	protein_coding	9.55895	-2.65135	0.773291	-3.42865	0.00060658	0.00925227
ENSG00000108582	CPD	protein_coding	1479.53	-1.98229	0.578209	-3.42832	0.00060732	0.00925636
ENSG00000239264	TXNDC5	protein_coding	18.0842	-2.24381	0.654722	-3.42712	0.00061001	0.00928085
ENSG00000254363	ENSG00000254363	lncRNA	9.57245	-4.26393	1.24423	-3.42697	0.00061037	0.00928085
ENSG00000097033	SH3GLB1	protein_coding	2705.25	-1.61757	0.472029	-3.42684	0.00061065	0.00928085
ENSG00000166825	ANPEP	protein_coding	2635.07	-1.64327	0.479545	-3.42673	0.0006109	0.00928085
ENSG00000197535	MYO5A	protein_coding	380.846	-1.33358	0.389204	-3.42644	0.00061155	0.00928085
ENSG00000166813	KIF7	protein_coding	7.66653	3.26173	0.951954	3.42635	0.00061175	0.00928085
ENSG00000049759	NEDD4L	protein_coding	404.871	1.67619	0.489303	3.42567	0.00061329	0.00929704
ENSG00000104267	CA2	protein_coding	369.335	1.36397	0.398253	3.42488	0.00061508	0.00930848
ENSG00000100526	CDKN3	protein_coding	20.3597	2.37289	0.692857	3.4248	0.00061526	0.00930848
ENSG00000242534	IGKV2D-28	IG_V_gene	8.47956	-3.50116	1.02232	-3.42471	0.00061546	0.00930848
ENSG00000196968	FUT11	protein_coding	160.788	-0.829635	0.242269	-3.42444	0.00061607	0.00931053
ENSG00000162129	CLPB	protein_coding	130.358	0.921507	0.269202	3.42311	0.00061909	0.0093451
ENSG00000288681	ENSG00000288681	protein_coding	29.4883	-2.13723	0.624407	-3.42281	0.00061977	0.0093451
ENSG00000226891	LINC01359	lncRNA	7.18149	-3.20366	0.935976	-3.42281	0.00061978	0.0093451
ENSG00000140995	DEF8	protein_coding	1273.72	-1.28492	0.375543	-3.4215	0.00062276	0.00938278
ENSG00000105507	CABP5	protein_coding	22.6398	-2.97045	0.86835	-3.4208	0.00062438	0.00939999
ENSG00000100450	GZMH	protein_coding	710.602	-2.22622	0.65086	-3.42044	0.00062521	0.00940528
ENSG00000166710	B2M	protein_coding	73263.6	-1.36945	0.400464	-3.41967	0.00062697	0.00941804
ENSG00000273033	LINC02035	lncRNA	275.571	-1.53863	0.449987	-3.41926	0.00062791	0.00941804
ENSG00000196954	CASP4	protein_coding	3553.34	-1.5465	0.452292	-3.41925	0.00062795	0.00941804
ENSG00000073737	DHRS9	protein_coding	207.089	-1.57897	0.461813	-3.41908	0.00062834	0.00941804
ENSG00000109881	CCDC34	protein_coding	32.5938	1.57884	0.46178	3.41903	0.00062844	0.00941804
ENSG00000100483	VCPKMT	protein_coding	215.227	-1.65138	0.483066	-3.41854	0.00062957	0.00941844
ENSG00000178573	MAF	protein_coding	171.614	-1.44124	0.4216	-3.4185	0.00062968	0.00941844
ENSG00000124731	TREM1	protein_coding	3940.33	-1.82694	0.534443	-3.4184	0.0006299	0.00941844
ENSG00000166508	MCM7	protein_coding	725.555	1.00927	0.2953	3.41777	0.00063135	0.00943297
ENSG00000162413	KLHL21	protein_coding	990.576	-1.28728	0.376724	-3.41704	0.00063307	0.00944823
ENSG00000096063	SRPK1	protein_coding	859.736	-1.87768	0.549525	-3.41692	0.00063333	0.00944823
ENSG00000144659	SLC25A38	protein_coding	845.824	1.27584	0.373435	3.4165	0.00063431	0.00945557
ENSG00000171241	SHCBP1	protein_coding	34.5106	1.8098	0.529899	3.41538	0.00063694	0.00947704
ENSG00000290577	ENSG00000290577	lncRNA	77.7215	1.56591	0.45849	3.41537	0.00063695	0.00947704
ENSG00000204308	RNF5	protein_coding	598.794	1.02627	0.300495	3.41527	0.00063719	0.00947704
ENSG00000004139	SARM1	protein_coding	45.2671	-1.83259	0.536674	-3.41471	0.00063849	0.00948921
ENSG00000289497	ENSG00000289497	lncRNA	4.43097	4.10727	1.20326	3.41346	0.00064145	0.00952599
ENSG00000181585	TMIE	protein_coding	13.3934	2.53727	0.743506	3.41258	0.00064352	0.00954956
ENSG00000115380	EFEMP1	protein_coding	4.29196	4.6219	1.35448	3.4123	0.00064418	0.00955214
ENSG00000169180	XPO6	protein_coding	8314.99	-1.63998	0.480744	-3.41134	0.00064645	0.00957871
ENSG00000105339	DENND3	protein_coding	3185.57	-1.60568	0.470736	-3.411	0.00064726	0.00958347
ENSG00000008438	PGLYRP1	protein_coding	1288.3	1.87821	0.550685	3.41068	0.00064801	0.00958734
ENSG00000204060	FOXO6	protein_coding	6.73973	3.31289	0.971562	3.40986	0.00064997	0.00960631
ENSG00000266017	MIR4477B	miRNA	65.882	-1.90714	0.559324	-3.40973	0.00065027	0.00960631
ENSG00000100731	PCNX1	protein_coding	1355.99	-1.45091	0.425921	-3.40653	0.00065795	0.00971258
ENSG00000117151	CTBS	protein_coding	522.692	-1.64977	0.484459	-3.40539	0.0006607	0.00974329
ENSG00000185947	ZNF267	protein_coding	427.492	-1.81204	0.53213	-3.40526	0.00066102	0.00974329
ENSG00000188906	LRRK2	protein_coding	3712.19	-1.81736	0.533951	-3.4036	0.00066505	0.0097953
ENSG00000198467	TPM2	protein_coding	94.3341	1.56565	0.460107	3.4028	0.00066699	0.00981655
ENSG00000164056	SPRY1	protein_coding	11.3317	2.20421	0.647895	3.40212	0.00066866	0.00983136
ENSG00000111790	FGFR1OP2	protein_coding	1343.78	0.944372	0.277595	3.40198	0.00066899	0.00983136
ENSG00000145819	ARHGAP26	protein_coding	1932.93	-1.74399	0.512765	-3.40114	0.00067104	0.00985416
ENSG00000102445	RUBCNL	protein_coding	740.078	-1.5014	0.441498	-3.4007	0.00067213	0.00986276
ENSG00000259384	GH1	protein_coding	3.82333	5.94182	1.74818	3.39887	0.00067665	0.00992162
ENSG00000164684	ZNF704	protein_coding	6.25051	3.73222	1.09826	3.3983	0.00067806	0.00993499
ENSG00000178999	AURKB	protein_coding	30.6041	1.80746	0.532327	3.39539	0.0006853	0.0100337
ENSG00000280614	ENSG00000280614	lncRNA	201.683	2.64786	0.779936	3.39497	0.00068637	0.0100382
ENSG00000117122	MFAP2	protein_coding	5.93928	5.83558	1.71895	3.39486	0.00068664	0.0100382
ENSG00000291003	ENSG00000291003	lncRNA	137.647	1.52445	0.4491	3.39447	0.00068762	0.0100452
ENSG00000141034	GID4	protein_coding	445.741	1.29539	0.381791	3.39294	0.00069148	0.010094
ENSG00000165678	GHITM	protein_coding	2650.14	0.702293	0.207001	3.3927	0.00069208	0.0100954
ENSG00000113303	BTNL8	protein_coding	358.328	-1.88368	0.555418	-3.39146	0.00069522	0.0101337
ENSG00000156239	N6AMT1	protein_coding	68.1179	1.10627	0.326234	3.39103	0.0006963	0.0101419
ENSG00000130150	MOSPD2	protein_coding	805.935	-1.71019	0.504378	-3.39069	0.00069716	0.0101469
ENSG00000144366	GULP1	protein_coding	42.1518	7.93709	2.34128	3.39007	0.00069875	0.0101626
ENSG00000140678	ITGAX	protein_coding	5966.03	-1.58438	0.467452	-3.3894	0.00070045	0.0101798
ENSG00000134871	COL4A2	protein_coding	7.83468	4.02821	1.1887	3.38876	0.00070209	0.010196
ENSG00000115935	WIPF1	protein_coding	4898.78	-1.16986	0.345271	-3.38822	0.00070347	0.0102086
ENSG00000197872	CYRIA	protein_coding	802.881	-1.15973	0.342351	-3.38754	0.00070521	0.0102264
ENSG00000232801	SDCBPP3	processed_pseudogene	33.5837	-2.14021	0.631836	-3.38728	0.00070589	0.0102286
ENSG00000108424	KPNB1	protein_coding	2983.28	-1.2655	0.373737	-3.38607	0.00070901	0.0102633
ENSG00000076604	TRAF4	protein_coding	85.6785	1.09938	0.324689	3.38595	0.00070932	0.0102633
ENSG00000159346	ADIPOR1	protein_coding	26148.5	1.24529	0.367943	3.38446	0.00071318	0.0103115
ENSG00000128274	A4GALT	protein_coding	4.85448	4.83487	1.42882	3.38383	0.00071482	0.0103277
ENSG00000010404	IDS	protein_coding	182.853	-1.55005	0.458287	-3.38226	0.00071893	0.0103765
ENSG00000134201	GSTM5	protein_coding	4.17322	6.06379	1.79289	3.38213	0.00071925	0.0103765
ENSG00000151725	CENPU	protein_coding	47.7091	1.97934	0.585448	3.38091	0.00072248	0.0104154
ENSG00000188021	UBQLN2	protein_coding	425.228	-1.2298	0.363863	-3.37984	0.00072528	0.0104481
ENSG00000173110	HSPA6	protein_coding	2365.13	-1.90286	0.563068	-3.37945	0.00072631	0.0104553
ENSG00000137309	HMGA1	protein_coding	943.2	1.17099	0.346576	3.37874	0.00072818	0.0104746
ENSG00000111647	BLTP3B	protein_coding	325.894	-1.57239	0.465505	-3.37781	0.00073065	0.0105025
ENSG00000132744	ACY3	protein_coding	7.65753	2.58997	0.76714	3.37614	0.00073511	0.0105589
ENSG00000133067	LGR6	protein_coding	52.2738	-1.83973	0.545134	-3.37482	0.00073864	0.0106018
ENSG00000119471	HSDL2	protein_coding	745.309	-1.62986	0.483073	-3.37395	0.00074099	0.0106216
ENSG00000280088	ENSG00000280088	TEC	118.38	-1.28698	0.381457	-3.37386	0.00074122	0.0106216
ENSG00000137575	SDCBP	protein_coding	9075.78	-1.75034	0.518818	-3.37371	0.00074163	0.0106216
ENSG00000111181	SLC6A12	protein_coding	26.7877	-1.81351	0.537629	-3.37316	0.00074311	0.0106351
ENSG00000089157	RPLP0	protein_coding	11382.5	1.0453	0.309922	3.37278	0.00074413	0.0106419
ENSG00000179104	TMTC2	protein_coding	38.3076	-1.40368	0.416348	-3.3714	0.00074786	0.010683
ENSG00000168010	ATG16L2	protein_coding	4190.08	-1.41483	0.419676	-3.37124	0.0007483	0.010683
ENSG00000143061	IGSF3	protein_coding	7.18246	3.52382	1.0453	3.37112	0.00074863	0.010683
ENSG00000274272	ENSG00000274272	lncRNA	85.2412	-1.06867	0.317042	-3.37076	0.0007496	0.0106891
ENSG00000012171	SEMA3B	protein_coding	55.9813	3.35262	0.994807	3.37012	0.00075135	0.0107063
ENSG00000289251	ENSG00000289251	lncRNA	66.5683	-1.66057	0.492895	-3.36901	0.00075438	0.0107418
ENSG00000149948	HMGA2	protein_coding	6.69156	2.94071	0.872943	3.36873	0.00075515	0.010745
ENSG00000107736	CDH23	protein_coding	231.649	-1.13563	0.337152	-3.3683	0.00075634	0.0107541
ENSG00000227502	MROCKI	lncRNA	6.09876	3.35457	0.996029	3.36794	0.00075733	0.0107604
ENSG00000261804	ENSG00000261804	lncRNA	24.4406	-2.11836	0.629137	-3.36709	0.00075966	0.0107858
ENSG00000119729	RHOQ	protein_coding	514.659	-0.969944	0.288361	-3.36364	0.00076921	0.0109085
ENSG00000225506	CYP4A22-AS1	lncRNA	11.8113	2.68694	0.798834	3.36357	0.00076941	0.0109085
ENSG00000107833	NPM3	protein_coding	82.9577	1.09047	0.32424	3.36317	0.00077052	0.0109164
ENSG00000047578	KATNIP	protein_coding	263.93	-1.36642	0.406488	-3.36153	0.00077511	0.0109734
ENSG00000272079	ENSG00000272079	lncRNA	32.236	-1.66035	0.494059	-3.36063	0.00077766	0.0110016
ENSG00000110079	MS4A4A	protein_coding	59.7814	-1.57928	0.470017	-3.36005	0.00077929	0.0110169
ENSG00000172247	C1QTNF4	protein_coding	12.3557	3.17668	0.945922	3.35829	0.00078427	0.0110793
ENSG00000261644	CYLD-AS1	lncRNA	50.5892	-1.39948	0.416843	-3.35734	0.00078697	0.0111095
ENSG00000166734	GOLM2	protein_coding	586.568	-1.2873	0.38346	-3.35706	0.00078777	0.0111127
ENSG00000189233	NUGGC	protein_coding	19.0902	-3.05613	0.910903	-3.35506	0.00079349	0.0111855
ENSG00000136938	ANP32B	protein_coding	5784.57	1.68294	0.501786	3.3539	0.0007968	0.0112241
ENSG00000010310	GIPR	protein_coding	24.666	-1.66182	0.495636	-3.35289	0.00079972	0.0112571
ENSG00000143226	FCGR2A	protein_coding	6175.31	-1.86848	0.557348	-3.35244	0.00080101	0.0112674
ENSG00000197057	DTHD1	protein_coding	36.9939	-1.72465	0.514718	-3.35067	0.00080616	0.011331
ENSG00000290116	ENSG00000290116	lncRNA	6.9575	-3.75858	1.1218	-3.35049	0.00080669	0.011331
ENSG00000239887	C1orf226	protein_coding	11.9949	2.15831	0.644242	3.35016	0.00080766	0.0113365
ENSG00000100938	GMPR2	protein_coding	538.885	-1.16192	0.346874	-3.34969	0.00080903	0.0113477
ENSG00000159314	ARHGAP27	protein_coding	2469.35	-1.31639	0.39302	-3.34941	0.00080983	0.0113508
ENSG00000070761	CFAP20	protein_coding	146.234	0.827376	0.247061	3.34888	0.00081139	0.0113646
ENSG00000161533	ACOX1	protein_coding	1215.27	-1.5432	0.461081	-3.34692	0.00081716	0.0114373
ENSG00000172059	KLF11	protein_coding	80.7152	-1.36857	0.409029	-3.34591	0.00082013	0.0114597
ENSG00000152082	MZT2B	protein_coding	311.48	1.61409	0.482411	3.34589	0.0008202	0.0114597
ENSG00000079277	MKNK1	protein_coding	1337.42	-1.7196	0.513961	-3.34578	0.0008205	0.0114597
ENSG00000150681	RGS18	protein_coding	1030.29	-1.95576	0.58471	-3.34483	0.00082334	0.0114912
ENSG00000269981	ENSG00000269981	processed_pseudogene	408.603	-1.97932	0.591985	-3.34353	0.00082719	0.0115295
ENSG00000116668	SWT1	protein_coding	222.981	1.01281	0.302918	3.34351	0.00082726	0.0115295
ENSG00000224660	SH3BP5-AS1	lncRNA	170.541	-1.17285	0.350823	-3.34315	0.00082834	0.0115365
ENSG00000183621	ZNF438	protein_coding	410.637	-1.75361	0.524616	-3.34265	0.00082982	0.0115411
ENSG00000155926	SLA	protein_coding	4283.87	-1.71954	0.514424	-3.34264	0.00082984	0.0115411
ENSG00000127946	HIP1	protein_coding	799.13	-1.80806	0.540948	-3.34239	0.00083062	0.0115437
ENSG00000182257	PRR34	lncRNA	4.40601	-4.27635	1.27991	-3.34113	0.00083438	0.0115837
ENSG00000178078	STAP2	protein_coding	16.9542	2.30715	0.69055	3.34103	0.00083467	0.0115837
ENSG00000125827	TMX4	protein_coding	1653.76	-1.60713	0.481128	-3.34034	0.00083675	0.0115991
ENSG00000119636	BBOF1	protein_coding	398.16	1.66422	0.498229	3.34027	0.00083696	0.0115991
ENSG00000005893	LAMP2	protein_coding	2630.18	-1.37311	0.411345	-3.33809	0.00084356	0.0116823
ENSG00000177324	BEND2	protein_coding	41.8438	-2.78153	0.833463	-3.33732	0.0008459	0.0117065
ENSG00000134909	ARHGAP32	protein_coding	48.7923	1.43237	0.429319	3.33638	0.00084876	0.0117379
ENSG00000127863	TNFRSF19	protein_coding	6.23728	2.67607	0.802391	3.33512	0.00085261	0.0117829
ENSG00000185963	BICD2	protein_coding	922.094	-1.1282	0.338304	-3.33487	0.00085339	0.0117854
ENSG00000108100	CCNY	protein_coding	1148.08	-0.944554	0.283328	-3.33378	0.00085674	0.0118234
ENSG00000126803	HSPA2	protein_coding	8.78545	2.85687	0.857057	3.33335	0.00085807	0.0118334
ENSG00000102755	FLT1	protein_coding	43.0483	1.58699	0.476221	3.33247	0.00086078	0.0118625
ENSG00000261236	BOP1	protein_coding	241.323	1.14683	0.344249	3.33139	0.00086414	0.0119005
ENSG00000122694	GLIPR2	protein_coding	3060.2	-1.37761	0.41385	-3.32876	0.00087233	0.0120048
ENSG00000205213	LGR4	protein_coding	10.4333	2.11634	0.63584	3.32842	0.00087341	0.0120114
ENSG00000170837	GPR27	protein_coding	466.977	-2.15113	0.646384	-3.32795	0.00087488	0.0120232
ENSG00000099204	ABLIM1	protein_coding	1496.76	1.33424	0.400968	3.32754	0.00087615	0.0120323
ENSG00000143207	COP1	protein_coding	928.477	-1.20548	0.362323	-3.32708	0.00087761	0.0120439
ENSG00000224177	LINC00570	lncRNA	350.468	2.03254	0.611104	3.32601	0.00088099	0.0120819
ENSG00000152495	CAMK4	protein_coding	603.83	1.39241	0.418716	3.32544	0.0008828	0.0120947
ENSG00000132475	H3-3B	protein_coding	11268.7	-1.52075	0.457325	-3.32533	0.00088315	0.0120947
ENSG00000090382	LYZ	protein_coding	23173.8	-1.32242	0.39777	-3.32457	0.00088555	0.0121183
ENSG00000204682	MIR1915HG	lncRNA	2.5779	5.36914	1.61507	3.32439	0.00088611	0.0121183
ENSG00000169189	NSMCE1	protein_coding	438.795	0.849447	0.255595	3.32342	0.00088922	0.0121513
ENSG00000121898	CPXM2	protein_coding	6.83015	4.2517	1.27938	3.32325	0.00088975	0.0121513
ENSG00000198417	MT1F	protein_coding	21.8123	-1.9687	0.592464	-3.3229	0.00089086	0.0121581
ENSG00000205531	NAP1L4	protein_coding	1944.19	0.88244	0.265653	3.32178	0.00089445	0.0121986
ENSG00000102309	PIN4	protein_coding	97.7318	1.19693	0.360669	3.31865	0.00090455	0.0123277
ENSG00000128578	STRIP2	protein_coding	19.88	1.90255	0.573447	3.31774	0.00090749	0.0123594
ENSG00000144136	SLC20A1	protein_coding	699.859	-0.62932	0.189733	-3.31688	0.0009103	0.012389
ENSG00000087589	CASS4	protein_coding	314.735	-1.68104	0.506946	-3.31602	0.0009131	0.0124185
ENSG00000076513	ANKRD13A	protein_coding	1854.05	-1.09489	0.330277	-3.31507	0.00091619	0.0124519
ENSG00000186470	BTN3A2	protein_coding	2217.67	-0.605935	0.182803	-3.31469	0.00091746	0.0124578
ENSG00000161217	PCYT1A	protein_coding	981.099	-1.26689	0.38222	-3.31456	0.00091788	0.0124578
ENSG00000110841	PPFIBP1	protein_coding	22.1307	1.6783	0.506531	3.31332	0.00092196	0.012497
ENSG00000163694	RBM47	protein_coding	1440.47	-2.00233	0.604344	-3.31323	0.00092225	0.012497
ENSG00000153046	CDYL	protein_coding	237.557	1.02544	0.30951	3.3131	0.00092267	0.012497
ENSG00000085840	ORC1	protein_coding	24.0156	1.95376	0.590182	3.31044	0.00093149	0.0126077
ENSG00000261821	ENSG00000261821	lncRNA	6.38981	5.18692	1.56704	3.31002	0.00093291	0.0126183
ENSG00000128016	ZFP36	protein_coding	2483.08	-1.58803	0.479869	-3.30929	0.00093533	0.0126424
ENSG00000157404	KIT	protein_coding	21.4571	2.22174	0.671653	3.30786	0.00094011	0.0126983
ENSG00000111247	RAD51AP1	protein_coding	17.8954	2.36295	0.714457	3.30735	0.00094185	0.0127115
ENSG00000154165	GPR15	protein_coding	17.9738	-2.2784	0.68893	-3.30716	0.00094245	0.0127115
ENSG00000076382	SPAG5	protein_coding	42.5094	1.75545	0.530831	3.307	0.00094302	0.0127115
ENSG00000137509	PRCP	protein_coding	1308.66	-1.13188	0.342403	-3.30569	0.00094742	0.012762
ENSG00000147459	DOCK5	protein_coding	1459.4	-1.62085	0.490398	-3.30517	0.00094919	0.0127771
ENSG00000139636	LMBR1L	protein_coding	375.288	-0.671578	0.203339	-3.30275	0.00095741	0.012879
ENSG00000261150	EPPK1	protein_coding	20.4616	2.19627	0.665159	3.30187	0.00096043	0.0129108
ENSG00000166987	MBD6	protein_coding	889.573	-1.44711	0.438335	-3.30138	0.00096211	0.012922
ENSG00000175556	LONRF3	protein_coding	15.6394	-2.20659	0.668412	-3.30124	0.00096258	0.012922
ENSG00000141337	ARSG	protein_coding	133.514	-1.18067	0.357786	-3.29994	0.00096706	0.0129699
ENSG00000100380	ST13	protein_coding	2866.11	1.1231	0.340352	3.29982	0.00096746	0.0129699
ENSG00000160796	NBEAL2	protein_coding	3951.09	-1.47141	0.446043	-3.29882	0.00097094	0.0130077
ENSG00000067248	DHX29	protein_coding	309.402	0.875029	0.265354	3.29759	0.00097518	0.0130556
ENSG00000229119	RPLP0P9	processed_pseudogene	116.631	1.27232	0.386034	3.29588	0.00098116	0.0131267
ENSG00000116701	NCF2	protein_coding	11685.6	-1.68707	0.512039	-3.29481	0.00098487	0.0131599
ENSG00000167767	KRT80	protein_coding	18.4486	3.60134	1.09304	3.29478	0.00098498	0.0131599
ENSG00000173535	TNFRSF10C	protein_coding	3389.84	-1.78393	0.54154	-3.29418	0.0009871	0.0131794
ENSG00000198919	DZIP3	protein_coding	177.353	1.25326	0.38056	3.29321	0.0009905	0.0132158
ENSG00000140563	MCTP2	protein_coding	1449.63	-1.94752	0.591577	-3.29208	0.0009945	0.0132569
ENSG00000136003	ISCU	protein_coding	1981.63	1.00221	0.30444	3.29196	0.00099492	0.0132569
ENSG00000261471	ENSG00000261471	lncRNA	67.1589	-1.99998	0.607683	-3.29115	0.00099779	0.0132837
ENSG00000286677	ENSG00000286677	lncRNA	4.9005	4.26681	1.2965	3.29101	0.00099828	0.0132837
ENSG00000134152	KATNBL1	protein_coding	458.611	-1.66937	0.507364	-3.29028	0.00100086	0.0132967
ENSG00000213214	ARHGEF35	protein_coding	13.7223	2.35151	0.714692	3.29024	0.00100101	0.0132967
ENSG00000118308	IRAG2	protein_coding	1057.69	-1.22315	0.371759	-3.29017	0.00100128	0.0132967
ENSG00000171320	ESCO2	protein_coding	11.9796	2.99985	0.911923	3.28958	0.00100336	0.0133153
ENSG00000186496	ZNF396	protein_coding	40.9173	-1.65151	0.502082	-3.28933	0.00100426	0.0133183
ENSG00000160710	ADAR	protein_coding	5554.24	-1.23993	0.376988	-3.28906	0.00100524	0.0133223
ENSG00000287104	ENSG00000287104	lncRNA	54.6916	1.09209	0.332107	3.28836	0.00100773	0.0133393
ENSG00000283787	PRR33	protein_coding	829.315	-0.936716	0.284862	-3.28832	0.00100787	0.0133393
ENSG00000067182	TNFRSF1A	protein_coding	3947.6	-1.5216	0.462872	-3.28729	0.00101155	0.0133718
ENSG00000027697	IFNGR1	protein_coding	3227.84	-1.59135	0.484108	-3.28719	0.00101194	0.0133718
ENSG00000103005	USB1	protein_coding	1206.86	-1.48395	0.451451	-3.28707	0.00101237	0.0133718
ENSG00000154889	MPPE1	protein_coding	453.817	-1.14792	0.349253	-3.2868	0.00101335	0.0133758
ENSG00000107521	HPS1	protein_coding	1137.33	1.40003	0.426005	3.28642	0.00101468	0.0133823
ENSG00000101290	CDS2	protein_coding	1089.67	-1.23472	0.375719	-3.28628	0.0010152	0.0133823
ENSG00000283602	ENSG00000283602	transcribed_unitary_pseudogene	59.3577	-1.86934	0.568994	-3.28533	0.00101862	0.0134184
ENSG00000019995	ZRANB1	protein_coding	317.111	0.772622	0.235192	3.28508	0.00101954	0.0134216
ENSG00000182197	EXT1	protein_coding	178.603	-1.4407	0.438633	-3.28453	0.00102151	0.0134385
ENSG00000185275	CD24P4	processed_pseudogene	10.9467	2.41148	0.734283	3.28414	0.00102296	0.0134486
ENSG00000206249	ENSG00000206249	lncRNA	3.62506	4.43544	1.35067	3.28389	0.00102384	0.0134512
ENSG00000228247	UBBP2	processed_pseudogene	8.33523	2.43714	0.742244	3.28347	0.00102536	0.0134579
ENSG00000172167	MTBP	protein_coding	20.6522	1.40905	0.429147	3.28338	0.00102571	0.0134579
ENSG00000123106	CCDC91	protein_coding	192.945	0.893616	0.272272	3.28207	0.0010305	0.0135073
ENSG00000136167	LCP1	protein_coding	23742.3	-1.30878	0.39878	-3.28197	0.00103085	0.0135073
ENSG00000236975	LINC02814	lncRNA	5.67415	4.06986	1.24016	3.28173	0.00103172	0.0135097
ENSG00000198795	ZNF521	protein_coding	6.44453	3.64945	1.11271	3.27977	0.00103891	0.0135892
ENSG00000220008	LINGO3	protein_coding	203.646	-1.47073	0.448433	-3.2797	0.00103917	0.0135892
ENSG00000129691	ASH2L	protein_coding	713.782	0.688026	0.209842	3.27878	0.00104256	0.0136153
ENSG00000170485	NPAS2	protein_coding	34.6142	1.9037	0.580652	3.27855	0.0010434	0.0136153
ENSG00000130449	ZSWIM6	protein_coding	256.059	-1.71869	0.524243	-3.27842	0.0010439	0.0136153
ENSG00000232912	RERE-AS1	lncRNA	45.3335	-1.59502	0.486522	-3.27841	0.00104393	0.0136153
ENSG00000120254	MTHFD1L	protein_coding	68.56	1.72072	0.524929	3.27801	0.00104542	0.0136196
ENSG00000167207	NOD2	protein_coding	755.129	-2.26687	0.69155	-3.27795	0.00104564	0.0136196
ENSG00000282572	FAM157D	lncRNA	126.881	-2.1649	0.660561	-3.27737	0.0010478	0.013622
ENSG00000238160	LINC02863	lncRNA	80.1094	-1.90606	0.581582	-3.27737	0.0010478	0.013622
ENSG00000172296	SPTLC3	protein_coding	63.9636	6.04055	1.84312	3.27734	0.0010479	0.013622
ENSG00000181220	ZNF746	protein_coding	764.389	-1.23486	0.377032	-3.27522	0.00105579	0.0137155
ENSG00000267440	LINC02594	lncRNA	7.20376	2.96105	0.904307	3.27438	0.00105893	0.0137472
ENSG00000180543	TSPYL5	protein_coding	32.2241	1.51631	0.463442	3.27186	0.00106844	0.0138615
ENSG00000258102	MAP1LC3B2	protein_coding	233.346	1.08162	0.330621	3.27148	0.00106985	0.0138708
ENSG00000153814	JAZF1	protein_coding	927.923	1.05055	0.321406	3.26862	0.00108072	0.0140025
ENSG00000175567	UCP2	protein_coding	4395.36	1.17738	0.360231	3.26839	0.00108163	0.014005
ENSG00000174132	FAM174A	protein_coding	113.752	-1.44885	0.443364	-3.26786	0.00108365	0.014022
ENSG00000175003	SLC22A1	protein_coding	32.8275	-1.91878	0.587235	-3.26748	0.00108509	0.0140239
ENSG00000141858	SAMD1	protein_coding	231.364	1.01313	0.310069	3.26745	0.00108522	0.0140239
ENSG00000291237	SOD2	protein_coding	21324.1	-1.67457	0.512548	-3.26715	0.00108636	0.0140294
ENSG00000230539	AOAH-IT1	lncRNA	15.1951	-2.81594	0.862244	-3.26583	0.00109144	0.0140857
ENSG00000099889	ARVCF	protein_coding	37.0776	1.6018	0.490565	3.26522	0.0010938	0.0140983
ENSG00000108932	SLC16A6	protein_coding	185.571	-1.92182	0.588576	-3.26521	0.00109384	0.0140983
ENSG00000289938	ENSG00000289938	lncRNA	11.6992	1.93332	0.592145	3.26494	0.00109486	0.0141022
ENSG00000162496	DHRS3	protein_coding	197.14	1.3528	0.414429	3.26424	0.00109758	0.0141217
ENSG00000163041	H3-3A	protein_coding	13695.4	-1.21368	0.371817	-3.26418	0.0010978	0.0141217
ENSG00000231233	CFAP58-DT	lncRNA	71.0086	-1.91748	0.587696	-3.26271	0.00110353	0.0141861
ENSG00000004799	PDK4	protein_coding	134.204	-2.46744	0.756388	-3.26214	0.00110576	0.0142055
ENSG00000072401	UBE2D1	protein_coding	1285	-1.98927	0.609889	-3.2617	0.00110748	0.0142183
ENSG00000179588	ZFPM1	protein_coding	97.9645	1.29725	0.397785	3.26117	0.00110952	0.0142352
ENSG00000138629	UBL7	protein_coding	1135.46	1.25122	0.383794	3.26014	0.00111357	0.0142779
ENSG00000113532	ST8SIA4	protein_coding	1237.25	-1.65538	0.507868	-3.25946	0.00111623	0.0143027
ENSG00000172965	MIR4435-2HG	lncRNA	248.624	-1.315	0.403475	-3.25919	0.00111731	0.0143073
ENSG00000167094	TTC16	protein_coding	132.039	-1.37714	0.422645	-3.25839	0.00112044	0.0143291
ENSG00000135519	KCNH3	protein_coding	97.722	-1.46667	0.450122	-3.25839	0.00112047	0.0143291
ENSG00000173762	CD7	protein_coding	1144.88	1.28418	0.3942	3.25768	0.00112325	0.0143554
ENSG00000019169	MARCO	protein_coding	70.7425	-2.2617	0.694465	-3.25675	0.00112697	0.0143773
ENSG00000197345	MRPL21	protein_coding	176.851	0.761208	0.233733	3.25674	0.00112701	0.0143773
ENSG00000135074	ADAM19	protein_coding	836.325	-1.46211	0.448958	-3.25669	0.00112721	0.0143773
ENSG00000170954	ZNF415	protein_coding	12.9773	2.35282	0.722496	3.25651	0.00112789	0.0143773
ENSG00000125375	DMAC2L	protein_coding	74.8348	1.04943	0.322309	3.25598	0.00113003	0.0143953
ENSG00000198353	HOXC4	protein_coding	9.44365	-2.84205	0.872958	-3.25566	0.00113128	0.0144019
ENSG00000260077	ENSG00000260077	lncRNA	23.6457	-1.60463	0.492967	-3.25505	0.00113373	0.0144238
ENSG00000213937	CLDN9	protein_coding	63.4728	-1.3837	0.425197	-3.25426	0.00113687	0.0144544
ENSG00000164068	RNF123	protein_coding	1302.36	1.50035	0.461096	3.25387	0.00113843	0.0144649
ENSG00000075420	FNDC3B	protein_coding	756.046	-1.92064	0.59033	-3.25351	0.0011399	0.0144657
ENSG00000149212	SESN3	protein_coding	3214.94	1.58049	0.485782	3.25349	0.00113996	0.0144657
ENSG00000142303	ADAMTS10	protein_coding	162.395	1.48194	0.455607	3.25268	0.00114323	0.0144899
ENSG00000267249	ENSG00000267249	lncRNA	7.64218	2.35702	0.724646	3.25265	0.00114334	0.0144899
ENSG00000179632	MAF1	protein_coding	4299.82	1.30788	0.402168	3.25207	0.00114569	0.0145103
ENSG00000172765	TMCC1	protein_coding	399.438	-1.48802	0.457616	-3.25168	0.00114726	0.0145209
ENSG00000152926	ZNF117	protein_coding	427.134	-2.15525	0.662992	-3.2508	0.00115082	0.0145566
ENSG00000231925	TAPBP	protein_coding	1276.93	-1.17677	0.362088	-3.24996	0.00115423	0.0145802
ENSG00000170892	TSEN34	protein_coding	1249.74	-1.57825	0.485632	-3.2499	0.00115447	0.0145802
ENSG00000211899	IGHM	IG_C_gene	3808.03	1.07177	0.329823	3.24955	0.00115589	0.0145802
ENSG00000156136	DCK	protein_coding	687.04	1.25134	0.385088	3.24948	0.00115615	0.0145802
ENSG00000217128	FNIP1	protein_coding	583.013	-1.59592	0.49114	-3.24943	0.00115638	0.0145802
ENSG00000135148	TRAFD1	protein_coding	898.099	-0.909757	0.280009	-3.24903	0.00115799	0.0145901
ENSG00000148411	NACC2	protein_coding	587.243	-1.65432	0.509254	-3.24852	0.00116007	0.0145901
ENSG00000197457	STMN3	protein_coding	499.174	1.13667	0.349905	3.24852	0.00116007	0.0145901
ENSG00000286481	ENSG00000286481	lncRNA	3.90375	4.4849	1.38061	3.24851	0.00116013	0.0145901
ENSG00000152785	BMP3	protein_coding	7.7185	3.23454	0.995964	3.24765	0.00116364	0.0146249
ENSG00000288524	ENSG00000288524	lncRNA	57.8147	4.18489	1.28878	3.24718	0.00116556	0.0146397
ENSG00000148341	SH3GLB2	protein_coding	1259.17	1.25079	0.385277	3.24648	0.0011684	0.014666
ENSG00000272953	ENSG00000272953	lncRNA	17.6667	-2.31187	0.712191	-3.24614	0.00116982	0.0146745
ENSG00000280832	GSEC	lncRNA	302.189	-2.13005	0.656424	-3.24492	0.00117483	0.0147271
ENSG00000178038	ALS2CL	protein_coding	120.848	1.66987	0.514653	3.24464	0.00117598	0.0147271
ENSG00000064547	LPAR2	protein_coding	1261.73	-1.48921	0.458985	-3.24458	0.00117625	0.0147271
ENSG00000126860	EVI2A	protein_coding	834.954	-1.66534	0.513322	-3.24424	0.00117766	0.0147354
ENSG00000101236	RNF24	protein_coding	1077.38	-2.02798	0.625245	-3.24349	0.00118073	0.0147644
ENSG00000057704	TMCC3	protein_coding	621.804	-1.75715	0.541788	-3.24324	0.0011818	0.0147684
ENSG00000168329	CX3CR1	protein_coding	1299.79	-0.999006	0.308097	-3.2425	0.00118485	0.0147971
ENSG00000131016	AKAP12	protein_coding	13.0016	2.72698	0.841336	3.24125	0.00119009	0.0148531
ENSG00000221930	DENND10P1	transcribed_processed_pseudogene	41.2735	-1.95359	0.603055	-3.23949	0.00119745	0.0149355
ENSG00000141551	CSNK1D	protein_coding	1734.65	-1.10031	0.339691	-3.23916	0.00119882	0.0149431
ENSG00000070444	MNT	protein_coding	398.942	-1.18163	0.364836	-3.23879	0.00120039	0.0149532
ENSG00000088992	TESC	protein_coding	3017.34	1.40036	0.432512	3.23775	0.00120478	0.0149903
ENSG00000189343	RPS2P46	processed_pseudogene	1018.02	0.776283	0.239762	3.23772	0.00120488	0.0149903
ENSG00000169116	PARM1	protein_coding	9.72559	-2.37663	0.734689	-3.23488	0.00121692	0.0151305
ENSG00000130703	OSBPL2	protein_coding	1145.72	-1.26123	0.389973	-3.23414	0.00122009	0.0151603
ENSG00000185862	EVI2B	protein_coding	6278.14	-1.43044	0.442375	-3.23355	0.00122262	0.0151815
ENSG00000135245	HILPDA	protein_coding	21.2754	1.66391	0.514604	3.23338	0.00122336	0.0151815
ENSG00000136147	PHF11	protein_coding	465.161	-0.819662	0.253514	-3.2332	0.0012241	0.0151815
ENSG00000100346	CACNA1I	protein_coding	63.9861	-1.86618	0.577379	-3.23215	0.00122862	0.0152137
ENSG00000254602	MIR130AHG	lncRNA	3.46159	4.29746	1.3296	3.23215	0.00122863	0.0152137
ENSG00000224975	INE1	lncRNA	23.3244	-1.46056	0.451899	-3.23206	0.00122902	0.0152137
ENSG00000181481	RNF135	protein_coding	423.883	-1.21024	0.374476	-3.23183	0.00123	0.0152163
ENSG00000139410	SDSL	protein_coding	48.333	1.68635	0.521847	3.23149	0.00123145	0.0152247
ENSG00000133961	NUMB	protein_coding	2260.18	-1.67421	0.518182	-3.23093	0.00123387	0.0152439
ENSG00000119669	IRF2BPL	protein_coding	499.281	-1.56239	0.483595	-3.23077	0.00123455	0.0152439
ENSG00000142507	PSMB6	protein_coding	700.822	1.00544	0.311308	3.22974	0.00123902	0.0152895
ENSG00000240809	CAP1P1	processed_pseudogene	133.129	-1.24218	0.384688	-3.22905	0.00124203	0.0153171
ENSG00000182752	PAPPA	protein_coding	68.3809	7.57954	2.34782	3.22833	0.00124516	0.0153461
ENSG00000092068	SLC7A8	protein_coding	49.3034	2.59623	0.804342	3.22777	0.0012476	0.0153665
ENSG00000289172	ENSG00000289172	lncRNA	228.224	-2.11265	0.65458	-3.22749	0.00124881	0.0153718
ENSG00000168040	FADD	protein_coding	139.206	-1.19358	0.369886	-3.2269	0.00125139	0.015394
ENSG00000275832	ARHGAP23	protein_coding	18.4522	2.1542	0.667815	3.22574	0.00125647	0.0154468
ENSG00000196724	ZNF418	protein_coding	30.5671	1.23442	0.3827	3.22556	0.00125725	0.0154468
ENSG00000080819	CPOX	protein_coding	266.272	1.43528	0.445007	3.2253	0.00125841	0.0154514
ENSG00000067082	KLF6	protein_coding	3385.58	-1.60072	0.496378	-3.2248	0.00126061	0.0154688
ENSG00000158717	RNF166	protein_coding	1442.14	-0.82775	0.25673	-3.22421	0.00126322	0.0154911
ENSG00000167851	CD300A	protein_coding	2135.39	-1.25291	0.388674	-3.22354	0.00126617	0.0155176
ENSG00000246100	LINC00900	lncRNA	3.89952	-4.09436	1.27024	-3.2233	0.00126724	0.0155211
ENSG00000279434	ENSG00000279434	TEC	26.2172	-1.47106	0.456479	-3.22262	0.00127026	0.0155484
ENSG00000070190	DAPP1	protein_coding	989.047	-1.64168	0.509489	-3.22221	0.00127208	0.015561
ENSG00000260467	ENSG00000260467	lncRNA	48.1737	-2.2621	0.702205	-3.22142	0.00127556	0.0155918
ENSG00000271821	ENSG00000271821	lncRNA	37.1943	-2.15708	0.669634	-3.22128	0.00127617	0.0155918
ENSG00000119535	CSF3R	protein_coding	43185.3	-1.66189	0.515941	-3.22109	0.00127706	0.0155929
ENSG00000232973	CYP1B1-AS1	lncRNA	58.1394	-2.11854	0.658111	-3.21912	0.00128586	0.0156907
ENSG00000188895	MSL1	protein_coding	4432.49	-1.65911	0.515495	-3.21848	0.00128871	0.0157125
ENSG00000288875	ENSG00000288875	lncRNA	78.9733	-1.85925	0.5777	-3.21836	0.00128924	0.0157125
ENSG00000286419	ENSG00000286419	lncRNA	3.7852	4.46974	1.38933	3.21719	0.00129451	0.015767
ENSG00000232368	FTLP2	processed_pseudogene	111.491	1.27886	0.397771	3.21507	0.00130411	0.015874
ENSG00000198915	RASGEF1A	protein_coding	84.1431	-1.78595	0.555743	-3.21363	0.00131067	0.0159378
ENSG00000277586	NEFL	protein_coding	3.23757	-4.58492	1.42674	-3.21357	0.00131096	0.0159378
ENSG00000228242	XPC-AS1	lncRNA	93.4689	-1.60032	0.498309	-3.2115	0.00132044	0.016043
ENSG00000146054	TRIM7	protein_coding	23.2956	-1.8798	0.585413	-3.21106	0.00132247	0.0160481
ENSG00000184602	SNN	protein_coding	1587.86	-1.28285	0.39951	-3.21106	0.00132248	0.0160481
ENSG00000122783	CYREN	protein_coding	321.665	-1.02117	0.318079	-3.21044	0.00132531	0.0160675
ENSG00000196230	TUBB	protein_coding	1798.03	0.944891	0.294326	3.21036	0.00132571	0.0160675
ENSG00000197763	TXNRD3	protein_coding	17.4403	1.90836	0.594506	3.21	0.00132735	0.0160775
ENSG00000291127	ANKRD36BP2	lncRNA	24.3318	2.17499	0.677799	3.2089	0.00133242	0.0161204
ENSG00000172264	MACROD2	protein_coding	40.6108	1.47789	0.460564	3.20888	0.00133253	0.0161204
ENSG00000087245	MMP2	protein_coding	6.25329	4.52724	1.41098	3.20859	0.00133389	0.016127
ENSG00000160050	CCDC28B	protein_coding	94.2858	1.13346	0.353352	3.20775	0.0013378	0.0161643
ENSG00000167972	ABCA3	protein_coding	34.9076	-1.56664	0.488502	-3.20703	0.00134112	0.0161945
ENSG00000141574	SECTM1	protein_coding	2654.31	-1.8336	0.571777	-3.20684	0.001342	0.0161953
ENSG00000185518	SV2B	protein_coding	2.27052	5.19259	1.62045	3.20441	0.00135337	0.0163179
ENSG00000131435	PDLIM4	protein_coding	26.601	7.32316	2.2854	3.20432	0.00135382	0.0163179
ENSG00000117411	B4GALT2	protein_coding	50.6072	1.66279	0.519051	3.20353	0.00135755	0.0163528
ENSG00000122420	PTGFR	protein_coding	3.69509	-4.79273	1.49616	-3.20335	0.0013584	0.0163531
ENSG00000265298	ENSG00000265298	unprocessed_pseudogene	103.112	-1.31872	0.411777	-3.20252	0.00136231	0.0163895
ENSG00000138119	MYOF	protein_coding	115.844	-1.32733	0.414492	-3.20231	0.00136332	0.0163895
ENSG00000005022	SLC25A5	protein_coding	1035.92	0.701476	0.219062	3.20218	0.00136392	0.0163895
ENSG00000289353	ENSG00000289353	lncRNA	435.664	-1.84868	0.577377	-3.20186	0.00136543	0.0163927
ENSG00000140284	SLC27A2	protein_coding	20.1424	1.87578	0.585895	3.20156	0.00136683	0.0163927
ENSG00000272711	HK2-DT	lncRNA	21.9304	1.32216	0.412998	3.20138	0.0013677	0.0163927
ENSG00000204366	ZBTB12	protein_coding	15.3248	1.6142	0.50424	3.20126	0.00136828	0.0163927
ENSG00000165283	STOML2	protein_coding	500.136	1.0263	0.320594	3.20125	0.00136835	0.0163927
ENSG00000247596	TWF2	protein_coding	814.02	-0.975128	0.304671	-3.20059	0.00137145	0.0164199
ENSG00000160299	PCNT	protein_coding	460.848	1.0264	0.320738	3.20012	0.00137373	0.0164372
ENSG00000113269	RNF130	protein_coding	2534.12	-1.39481	0.435896	-3.19988	0.00137487	0.0164408
ENSG00000074660	SCARF1	protein_coding	282.664	-1.24023	0.387633	-3.1995	0.00137667	0.0164524
ENSG00000227191	TRGC2	TR_C_gene	389.065	-1.42845	0.446487	-3.1993	0.00137761	0.0164537
ENSG00000162062	TEDC2	protein_coding	6.71548	2.72236	0.850986	3.19907	0.00137872	0.016457
ENSG00000182873	PRKCZ-AS1	lncRNA	54.4255	-1.00553	0.314577	-3.19647	0.0013912	0.0165958
ENSG00000142634	EFHD2	protein_coding	8402.57	-1.28285	0.401407	-3.19588	0.00139405	0.0166198
ENSG00000076864	RAP1GAP	protein_coding	1457.12	2.51682	0.787693	3.19518	0.00139745	0.0166407
ENSG00000291135	FCGR1BP	lncRNA	154.227	-2.04113	0.638819	-3.19517	0.00139749	0.0166407
ENSG00000244649	LINC02086	lncRNA	6.51375	-4.02774	1.26098	-3.19413	0.00140255	0.0166851
ENSG00000248884	ENSG00000248884	lncRNA	5.51316	3.77236	1.18106	3.19405	0.00140291	0.0166851
ENSG00000226252	ENSG00000226252	lncRNA	11.1913	2.42054	0.757892	3.19378	0.00140422	0.0166905
ENSG00000173262	SLC2A14	protein_coding	17.4735	2.78035	0.870711	3.19319	0.00140711	0.0167148
ENSG00000162878	PKDCC	protein_coding	5.31187	3.20761	1.0046	3.19294	0.00140833	0.0167192
ENSG00000287733	ENSG00000287733	lncRNA	18.7757	-1.66527	0.521601	-3.19261	0.00140992	0.0167253
ENSG00000264112	ENSG00000264112	lncRNA	144.499	-1.12214	0.351495	-3.19249	0.00141053	0.0167253
ENSG00000285444	ENSG00000285444	protein_coding	4.22928	-4.97774	1.55952	-3.19184	0.00141369	0.0167526
ENSG00000246548	LINC02288	lncRNA	17.3841	-2.68939	0.842692	-3.19142	0.00141573	0.0167667
ENSG00000106628	POLD2	protein_coding	223.99	1.08192	0.339043	3.19111	0.00141726	0.0167747
ENSG00000153044	CENPH	protein_coding	45.8333	1.15324	0.361464	3.19046	0.00142046	0.0168025
ENSG00000255477	ENSG00000255477	lncRNA	10.6653	3.24066	1.01606	3.18944	0.00142548	0.0168518
ENSG00000163131	CTSS	protein_coding	15091.3	-1.50103	0.470702	-3.18891	0.00142808	0.0168724
ENSG00000154479	CFAP210	protein_coding	4.41353	3.65375	1.14584	3.18871	0.00142908	0.0168741
ENSG00000226026	RWDD3-DT	lncRNA	11.7075	2.63905	0.82774	3.18826	0.00143131	0.0168903
ENSG00000130775	THEMIS2	protein_coding	3514.5	-1.47845	0.464046	-3.18599	0.00144259	0.0170133
ENSG00000262482	ENSG00000262482	lncRNA	5.93119	3.38389	1.06233	3.18535	0.0014458	0.0170409
ENSG00000170906	NDUFA3	protein_coding	364.556	0.860103	0.270185	3.18339	0.00145563	0.0171465
ENSG00000130203	APOE	protein_coding	7.91174	3.37475	1.06044	3.18242	0.00146051	0.0171937
ENSG00000112234	FBXL4	protein_coding	265.583	0.978203	0.307429	3.18188	0.00146324	0.0172155
ENSG00000226608	FTLP3	processed_pseudogene	1844.19	1.08558	0.341245	3.18125	0.0014664	0.0172425
ENSG00000170006	TMEM154	protein_coding	2514.01	-1.5355	0.482713	-3.18099	0.00146773	0.0172477
ENSG00000224228	ENSG00000224228	lncRNA	2.901	5.57136	1.75161	3.1807	0.0014692	0.0172548
ENSG00000026297	RNASET2	protein_coding	3865.13	-1.24067	0.390085	-3.1805	0.00147019	0.0172561
ENSG00000237441	RGL2	protein_coding	1411.91	-1.20732	0.379627	-3.18028	0.00147132	0.0172591
ENSG00000079691	CARMIL1	protein_coding	42.5859	1.60562	0.504977	3.17959	0.00147486	0.0172838
ENSG00000166483	WEE1	protein_coding	84.8418	1.22828	0.38631	3.17952	0.00147518	0.0172838
ENSG00000183638	RP1L1	protein_coding	2.69108	4.64791	1.46251	3.17803	0.00148281	0.0173628
ENSG00000145868	FBXO38	protein_coding	607.674	-1.10724	0.348503	-3.17713	0.00148742	0.0174065
ENSG00000143164	DCAF6	protein_coding	857.614	1.05122	0.330899	3.17685	0.00148884	0.0174128
ENSG00000260916	CCPG1	protein_coding	529.55	-1.5253	0.480308	-3.17567	0.00149493	0.0174736
ENSG00000128268	MGAT3	protein_coding	37.7013	1.72422	0.543095	3.1748	0.00149941	0.0175157
ENSG00000184831	APOO	protein_coding	89.8521	2.09614	0.660377	3.17415	0.00150276	0.0175274
ENSG00000070182	SPTB	protein_coding	1890.19	2.149	0.677031	3.17415	0.00150277	0.0175274
ENSG00000110934	BIN2	protein_coding	5171.26	-1.18323	0.372778	-3.17409	0.00150308	0.0175274
ENSG00000265972	TXNIP	protein_coding	25856.7	-1.11128	0.350149	-3.17374	0.00150486	0.0175378
ENSG00000112343	TRIM38	protein_coding	1013.21	-0.882136	0.27806	-3.17247	0.00151149	0.0176034
ENSG00000059804	SLC2A3	protein_coding	5841.76	-1.84032	0.580117	-3.17232	0.00151228	0.0176034
ENSG00000108509	CAMTA2	protein_coding	538.137	-1.09945	0.346607	-3.17204	0.00151374	0.01761
ENSG00000273136	NBPF26	protein_coding	191.73	-1.56037	0.492206	-3.17016	0.00152355	0.0177136
ENSG00000291215	ENSG00000291215	lncRNA	106.617	-1.31993	0.416397	-3.16987	0.00152505	0.0177206
ENSG00000225964	NRIR	lncRNA	83.1431	1.85201	0.584539	3.16833	0.00153317	0.0178045
ENSG00000188070	ZFTA	protein_coding	56.5413	1.12847	0.356223	3.16787	0.00153558	0.017822
ENSG00000288887	ENSG00000288887	lncRNA	88.4439	-1.76331	0.556797	-3.16689	0.00154079	0.0178718
ENSG00000186529	CYP4F3	protein_coding	1257.8	-1.54514	0.488049	-3.16595	0.00154577	0.0179191
ENSG00000118515	SGK1	protein_coding	515.232	-1.03017	0.325518	-3.16472	0.00155233	0.0179798
ENSG00000197653	DNAH10	protein_coding	16.0783	2.50259	0.790801	3.16462	0.00155283	0.0179798
ENSG00000213462	ERV3-1	protein_coding	151.064	-1.80337	0.570111	-3.16319	0.00156049	0.0180579
ENSG00000048740	CELF2	protein_coding	2739.07	-1.14896	0.363262	-3.1629	0.00156206	0.0180655
ENSG00000143149	ALDH9A1	protein_coding	444.134	-0.665421	0.210403	-3.16261	0.00156363	0.0180712
ENSG00000105722	ERF	protein_coding	523.143	-1.16206	0.367455	-3.16247	0.00156439	0.0180712
ENSG00000104133	SPG11	protein_coding	634.682	-0.94645	0.299321	-3.16199	0.00156693	0.0180899
ENSG00000140534	TICRR	protein_coding	8.6686	2.33561	0.738731	3.16166	0.00156872	0.0181
ENSG00000133985	TTC9	protein_coding	301.137	0.963477	0.304801	3.161	0.00157228	0.0181169
ENSG00000267679	EIF5AP2	processed_pseudogene	4.14949	4.48617	1.41926	3.16092	0.0015727	0.0181169
ENSG00000154803	FLCN	protein_coding	571.745	1.20739	0.381978	3.16088	0.00157294	0.0181169
ENSG00000163359	COL6A3	protein_coding	42.2567	2.05941	0.651635	3.16038	0.00157563	0.0181345
ENSG00000168310	IRF2	protein_coding	1341.03	-1.17338	0.371294	-3.16025	0.00157632	0.0181345
ENSG00000137502	RAB30	protein_coding	116.697	1.07136	0.339099	3.15943	0.00158076	0.018175
ENSG00000198520	ARMH1	protein_coding	257.436	1.23974	0.39255	3.15817	0.00158764	0.0182436
ENSG00000103313	MEFV	protein_coding	1798.68	-1.6049	0.508329	-3.15721	0.00159288	0.0182865
ENSG00000116106	EPHA4	protein_coding	45.4277	1.46493	0.464014	3.15707	0.00159362	0.0182865
ENSG00000075399	VPS9D1	protein_coding	399.802	-1.45872	0.462063	-3.15697	0.00159416	0.0182865
ENSG00000083845	RPS5	protein_coding	5704.27	1.06132	0.336331	3.15559	0.00160175	0.0183629
ENSG00000133687	TMTC1	protein_coding	9.80614	-3.12386	0.990443	-3.15401	0.00161044	0.0184517
ENSG00000233392	UICLM	lncRNA	5.09735	-3.75854	1.19206	-3.15298	0.00161612	0.0185061
ENSG00000142686	C1orf216	protein_coding	79.7331	-0.972477	0.308465	-3.15264	0.00161804	0.0185172
ENSG00000054967	RELT	protein_coding	372.762	-1.17331	0.372286	-3.15164	0.00162359	0.0185658
ENSG00000120913	PDLIM2	protein_coding	606.058	-0.850008	0.269715	-3.1515	0.00162434	0.0185658
ENSG00000164124	TMEM144	protein_coding	36.6126	-1.69371	0.537454	-3.15136	0.00162511	0.0185658
ENSG00000088256	GNA11	protein_coding	63.7567	1.68993	0.536349	3.1508	0.00162826	0.0185911
ENSG00000120280	TASL	protein_coding	351.534	-1.35915	0.431615	-3.14899	0.00163837	0.0186957
ENSG00000140932	CMTM2	protein_coding	1743.93	-1.57795	0.501176	-3.14849	0.00164118	0.0187071
ENSG00000154589	LY96	protein_coding	269.803	-2.02849	0.644278	-3.14847	0.00164128	0.0187071
ENSG00000076108	BAZ2A	protein_coding	1381.25	-0.95421	0.3031	-3.14817	0.00164297	0.0187156
ENSG00000185215	TNFAIP2	protein_coding	2768.66	-1.44371	0.458616	-3.14797	0.0016441	0.0187177
ENSG00000177432	NAP1L5	protein_coding	26.9289	1.47105	0.467383	3.14742	0.00164717	0.0187418
ENSG00000184451	CCR10	protein_coding	4.13439	-4.1477	1.31797	-3.14705	0.00164929	0.018755
ENSG00000225342	LRRK2-DT	lncRNA	76.3918	-1.67621	0.532721	-3.1465	0.00165238	0.0187794
ENSG00000229271	ENSG00000229271	lncRNA	2.61949	4.64699	1.47706	3.14611	0.0016546	0.0187818
ENSG00000184014	DENND5A	protein_coding	2195.63	-1.45244	0.461667	-3.14607	0.0016548	0.0187818
ENSG00000221963	APOL6	protein_coding	864.076	-0.692024	0.219987	-3.14574	0.00165665	0.0187818
ENSG00000142675	CNKSR1	protein_coding	21.5031	1.9304	0.613674	3.14565	0.0016572	0.0187818
ENSG00000008516	MMP25	protein_coding	5423.06	-1.72578	0.54863	-3.14562	0.00165736	0.0187818
ENSG00000284930	ENSG00000284930	lncRNA	65.3548	-1.85905	0.591283	-3.14409	0.00166602	0.0188691
ENSG00000135604	STX11	protein_coding	1237.57	-1.76931	0.562913	-3.14312	0.00167155	0.0189177
ENSG00000085999	RAD54L	protein_coding	11.9785	2.14155	0.681369	3.143	0.00167223	0.0189177
ENSG00000254901	BORCS8	protein_coding	207.451	-1.02162	0.32508	-3.14268	0.00167411	0.0189274
ENSG00000139187	KLRG1	protein_coding	227.298	-1.5481	0.492632	-3.14252	0.00167501	0.0189274
ENSG00000198435	NRARP	protein_coding	9.36231	2.76003	0.878388	3.14215	0.00167711	0.0189391
ENSG00000189143	CLDN4	protein_coding	14.9029	3.99386	1.27112	3.142	0.00167796	0.0189391
ENSG00000141298	SSH2	protein_coding	3112.82	-1.50253	0.478307	-3.14134	0.00168174	0.0189708
ENSG00000186187	ZNRF1	protein_coding	90.9049	1.09203	0.347746	3.14032	0.00168763	0.0190264
ENSG00000099901	RANBP1	protein_coding	442.125	0.846951	0.269728	3.14002	0.00168938	0.0190352
ENSG00000188559	RALGAPA2	protein_coding	745.309	-1.66891	0.531727	-3.13867	0.00169718	0.0191122
ENSG00000198182	ZNF607	protein_coding	29.7782	1.37935	0.439629	3.13752	0.00170384	0.0191762
ENSG00000177409	SAMD9L	protein_coding	811.991	-1.16213	0.370453	-3.13705	0.00170659	0.0191952
ENSG00000067840	PDZD4	protein_coding	143.125	-2.11219	0.673338	-3.13689	0.00170747	0.0191952
ENSG00000169126	ODAD2	protein_coding	2.77004	5.49517	1.75284	3.13502	0.00171842	0.0193072
ENSG00000165030	NFIL3	protein_coding	839.819	-1.54168	0.491994	-3.13354	0.00172711	0.0193939
ENSG00000116514	RNF19B	protein_coding	996.124	-1.29029	0.411795	-3.13334	0.00172832	0.0193963
ENSG00000124635	H2BC11	protein_coding	54.5054	-1.41398	0.451359	-3.13271	0.00173201	0.0194177
ENSG00000076685	NT5C2	protein_coding	502.761	-1.49034	0.475741	-3.13268	0.0017322	0.0194177
ENSG00000108788	MLX	protein_coding	567.717	-0.860027	0.274708	-3.1307	0.00174391	0.019538
ENSG00000183283	DAZAP2	protein_coding	6005.03	-0.992898	0.317244	-3.12976	0.00174948	0.0195841
ENSG00000291113	ENSG00000291113	lncRNA	66.149	0.932168	0.297857	3.12958	0.00175056	0.0195841
ENSG00000223722	IFITM3P2	processed_pseudogene	29.6668	-2.03886	0.651497	-3.12951	0.00175101	0.0195841
ENSG00000291048	ENSG00000291048	lncRNA	144.505	-1.52059	0.486001	-3.12877	0.0017554	0.019622
ENSG00000089639	GMIP	protein_coding	2398.08	-1.28654	0.411427	-3.12701	0.00176594	0.0197287
ENSG00000133110	POSTN	protein_coding	20.2413	7.63483	2.4419	3.1266	0.0017684	0.019745
ENSG00000086289	EPDR1	protein_coding	12.6923	1.97769	0.632613	3.12623	0.00177064	0.0197588
ENSG00000176083	ZNF683	protein_coding	53.818	-2.08007	0.665399	-3.12606	0.00177167	0.0197591
ENSG00000138336	TET1	protein_coding	10.663	2.11137	0.675552	3.12541	0.00177559	0.0197801
ENSG00000135956	TMEM127	protein_coding	1573.61	-1.29393	0.414009	-3.12537	0.0017758	0.0197801
ENSG00000182831	HAPSTR1	protein_coding	1542.55	-1.38062	0.441763	-3.12525	0.00177656	0.0197801
ENSG00000260220	CCDC187	protein_coding	4.36753	3.18629	1.01965	3.12489	0.00177871	0.0197928
ENSG00000115155	OTOF	protein_coding	4.04125	-4.14236	1.32593	-3.12411	0.00178345	0.0198318
ENSG00000135365	PHF21A	protein_coding	1795.08	-1.54573	0.494795	-3.12398	0.00178422	0.0198318
ENSG00000116815	CD58	protein_coding	335.151	-1.58318	0.506938	-3.12303	0.00179002	0.019885
ENSG00000125726	CD70	protein_coding	4.13657	-4.15294	1.32987	-3.12281	0.00179134	0.0198884
ENSG00000242324	ENSG00000242324	unprocessed_pseudogene	10.1333	-2.47396	0.792296	-3.12252	0.00179311	0.0198969
ENSG00000146376	ARHGAP18	protein_coding	144.692	-1.00863	0.323127	-3.12148	0.00179946	0.019956
ENSG00000197405	C5AR1	protein_coding	5387.01	-1.70986	0.547905	-3.12073	0.00180405	0.0199895
ENSG00000058091	CDK14	protein_coding	129.215	-1.29876	0.416184	-3.12065	0.00180454	0.0199895
ENSG00000242588	ENSG00000242588	lncRNA	693.971	-0.817753	0.262059	-3.12049	0.00180552	0.0199895
ENSG00000066735	KIF26A	protein_coding	8.33076	3.27849	1.05086	3.11982	0.00180962	0.0200143
ENSG00000180871	CXCR2	protein_coding	13340.8	-1.78946	0.573609	-3.11966	0.00181061	0.0200143
ENSG00000106443	PHF14	protein_coding	254.897	0.83965	0.269151	3.11963	0.0018108	0.0200143
ENSG00000169495	HTRA4	protein_coding	6.47011	2.65171	0.850115	3.11924	0.00181319	0.0200295
ENSG00000166025	AMOTL1	protein_coding	28.1987	2.37175	0.760719	3.11778	0.0018222	0.020107
ENSG00000005108	THSD7A	protein_coding	17.8509	7.45219	2.39023	3.11777	0.00182225	0.020107
ENSG00000077238	IL4R	protein_coding	3946.4	-1.76355	0.56572	-3.11736	0.00182478	0.0201128
ENSG00000265354	TIMM23	protein_coding	262.302	0.873686	0.280278	3.11721	0.00182569	0.0201128
ENSG00000152894	PTPRK	protein_coding	46.2673	1.37935	0.442498	3.11719	0.00182584	0.0201128
ENSG00000185361	TNFAIP8L1	protein_coding	160.411	1.10912	0.355907	3.11631	0.0018313	0.0201584
ENSG00000135842	NIBAN1	protein_coding	6883.42	-1.81604	0.582775	-3.11619	0.00183203	0.0201584
ENSG00000168078	PBK	protein_coding	10.8372	2.10435	0.675369	3.11584	0.0018342	0.020171
ENSG00000185760	KCNQ5	protein_coding	22.3301	1.65608	0.531789	3.11417	0.00184463	0.0202744
ENSG00000184515	BEX5	protein_coding	6.99218	-3.58467	1.15191	-3.11194	0.00185861	0.0204167
ENSG00000157045	NTAN1	protein_coding	491.567	1.20292	0.386576	3.11172	0.00185998	0.0204183
ENSG00000171302	CANT1	protein_coding	1373.12	-1.22239	0.392881	-3.11136	0.00186228	0.0204183
ENSG00000140287	HDC	protein_coding	29.2493	2.14135	0.688277	3.11117	0.00186349	0.0204183
ENSG00000166851	PLK1	protein_coding	52.4472	1.61531	0.519207	3.11111	0.00186387	0.0204183
ENSG00000247934	ENSG00000247934	lncRNA	28.8981	1.81392	0.583048	3.1111	0.00186393	0.0204183
ENSG00000219201	ENSG00000219201	processed_pseudogene	135.114	1.08748	0.349601	3.11064	0.00186681	0.0204384
ENSG00000163659	TIPARP	protein_coding	300.377	-1.25265	0.402913	-3.10899	0.00187726	0.0205415
ENSG00000213090	SCYL2P1	processed_pseudogene	5.87382	3.05893	0.984178	3.10811	0.00188288	0.0205916
ENSG00000173083	HPSE	protein_coding	386.375	-1.49399	0.480742	-3.10768	0.00188561	0.02061
ENSG00000138834	MAPK8IP3	protein_coding	965.914	-0.689259	0.22181	-3.10743	0.00188724	0.0206163
ENSG00000214872	SMTNL1	protein_coding	17.4952	-2.05456	0.661311	-3.1068	0.00189124	0.0206407
ENSG00000100647	SUSD6	protein_coding	1258.09	-1.54443	0.497124	-3.10674	0.00189163	0.0206407
ENSG00000161981	SNRNP25	protein_coding	110.846	1.17259	0.377454	3.10659	0.00189262	0.0206407
ENSG00000111261	MANSC1	protein_coding	612.47	-1.58066	0.508886	-3.10611	0.00189566	0.0206625
ENSG00000148572	NRBF2	protein_coding	1269.51	-1.5715	0.50604	-3.1055	0.00189961	0.020694
ENSG00000008513	ST3GAL1	protein_coding	2022.99	0.866406	0.279038	3.10498	0.00190293	0.0207188
ENSG00000115607	IL18RAP	protein_coding	1262.38	-1.83007	0.589534	-3.10427	0.00190751	0.0207573
ENSG00000255545	B3GAT1-DT	lncRNA	3.26449	-4.59813	1.48135	-3.10402	0.00190911	0.0207631
ENSG00000165138	ANKS6	protein_coding	75.8121	1.25702	0.405034	3.1035	0.00191243	0.0207878
ENSG00000092531	SNAP23	protein_coding	333.208	-1.29843	0.41842	-3.10318	0.00191456	0.0207995
ENSG00000104324	CPQ	protein_coding	624.683	-1.41932	0.457523	-3.10218	0.00192104	0.0208584
ENSG00000117519	CNN3	protein_coding	49.416	2.46518	0.795046	3.10067	0.00193081	0.0209529
ENSG00000185761	ADAMTSL5	protein_coding	5.4381	-3.87879	1.25102	-3.1005	0.00193197	0.020954
ENSG00000184271	POU6F1	protein_coding	58.0581	-1.71835	0.554292	-3.10008	0.00193467	0.0209717
ENSG00000165071	TMEM71	protein_coding	1836.05	-1.49443	0.482212	-3.09911	0.001941	0.0210287
ENSG00000168610	STAT3	protein_coding	3247.28	-1.30548	0.421317	-3.09856	0.00194461	0.0210563
ENSG00000103202	NME4	protein_coding	537.947	1.64152	0.529816	3.09829	0.00194642	0.0210643
ENSG00000160712	IL6R	protein_coding	4454.62	-1.57511	0.508542	-3.09731	0.00195288	0.0211227
ENSG00000065717	TLE2	protein_coding	82.465	1.78818	0.577392	3.09699	0.00195495	0.0211334
ENSG00000138439	FAM117B	protein_coding	346.688	0.871436	0.281442	3.09632	0.00195938	0.0211696
ENSG00000008130	NADK	protein_coding	3993.69	-1.33283	0.430535	-3.09575	0.00196314	0.0211987
ENSG00000184611	KCNH7	protein_coding	59.4412	-1.99249	0.643804	-3.09488	0.00196893	0.0212496
ENSG00000278535	DHRS11	protein_coding	28.4414	1.27528	0.412139	3.0943	0.00197281	0.0212642
ENSG00000187535	IFT140	protein_coding	56.4206	1.36068	0.439738	3.0943	0.00197281	0.0212642
ENSG00000285884	ENSG00000285884	lncRNA	13.9101	2.60309	0.841285	3.09419	0.00197352	0.0212642
ENSG00000281005	LINC00921	lncRNA	127.26	-1.14655	0.370625	-3.09355	0.00197776	0.0212982
ENSG00000140332	TLE3	protein_coding	2507.7	-1.59731	0.516455	-3.09284	0.00198251	0.0213377
ENSG00000164125	GASK1B	protein_coding	376.491	-2.02771	0.655687	-3.09249	0.00198485	0.0213512
ENSG00000160307	S100B	protein_coding	107.041	2.17471	0.703281	3.09223	0.00198657	0.021358
ENSG00000181274	FRAT2	protein_coding	4750.74	-1.69772	0.549224	-3.09112	0.00199406	0.0214204
ENSG00000228283	KATNBL1P6	transcribed_processed_pseudogene	27.8894	-1.81204	0.586241	-3.09095	0.0019952	0.0214204
ENSG00000163328	GPR155	protein_coding	474.957	-1.23074	0.398185	-3.09088	0.00199563	0.0214204
ENSG00000008226	DLEC1	protein_coding	43.0445	-1.39036	0.450027	-3.08951	0.00200489	0.0215081
ENSG00000048392	RRM2B	protein_coding	484.17	-1.51925	0.491891	-3.08858	0.00201113	0.0215571
ENSG00000153015	CWC27	protein_coding	175.292	0.825913	0.267415	3.08851	0.00201164	0.0215571
ENSG00000111199	TRPV4	protein_coding	7.50245	-2.80535	0.908393	-3.08826	0.00201332	0.0215634
ENSG00000120158	RCL1	protein_coding	92.4654	1.29533	0.419499	3.08781	0.00201635	0.021584
ENSG00000102710	SUPT20H	protein_coding	348.464	-1.17476	0.380558	-3.08693	0.00202236	0.0216366
ENSG00000253842	ENSG00000253842	lncRNA	7.20943	3.7742	1.223	3.08601	0.00202859	0.0216915
ENSG00000213293	ENSG00000213293	processed_pseudogene	48.3513	1.24784	0.404416	3.08553	0.00203189	0.021715
ENSG00000164627	KIF6	protein_coding	5.34332	4.94656	1.60338	3.08509	0.00203494	0.0217358
ENSG00000290077	ENSG00000290077	lncRNA	5.53523	3.02228	0.980193	3.08335	0.00204687	0.021849
ENSG00000096384	HSP90AB1	protein_coding	3356.83	0.869611	0.282047	3.08322	0.00204776	0.021849
ENSG00000175287	PHYHD1	protein_coding	8.88226	2.34373	0.760214	3.08299	0.00204933	0.0218539
ENSG00000151136	ABTB3	protein_coding	132.999	0.985932	0.319857	3.08242	0.00205328	0.0218842
ENSG00000162511	LAPTM5	protein_coding	8622.15	-1.11534	0.36187	-3.08216	0.00205503	0.021891
ENSG00000181016	LSMEM1	protein_coding	25.0832	-2.37403	0.770288	-3.082	0.00205617	0.0218913
ENSG00000012232	EXTL3	protein_coding	648.017	-1.29188	0.419218	-3.08164	0.00205862	0.0219056
ENSG00000197852	INKA2	protein_coding	1717.93	-1.65997	0.5388	-3.08087	0.002064	0.021951
ENSG00000198157	HMGN5	protein_coding	39.8826	1.88595	0.612295	3.08013	0.0020691	0.0219824
ENSG00000162390	ACOT11	protein_coding	10.9916	1.89928	0.616625	3.08012	0.00206918	0.0219824
ENSG00000177830	CHID1	protein_coding	358.779	1.24666	0.404792	3.07975	0.00207173	0.0219976
ENSG00000171051	FPR1	protein_coding	13683.8	-1.59244	0.517097	-3.07957	0.002073	0.0219992
ENSG00000224041	IGKV3D-15	IG_V_gene	10.2966	-3.32769	1.08067	-3.07929	0.00207496	0.0220082
ENSG00000169715	MT1E	protein_coding	8.47914	-2.69907	0.877239	-3.07677	0.00209253	0.0221827
ENSG00000134698	AGO4	protein_coding	1581.72	-1.62722	0.528974	-3.07617	0.00209676	0.0222155
ENSG00000138801	PAPSS1	protein_coding	596.691	-1.02992	0.334918	-3.07514	0.00210401	0.0222803
ENSG00000160593	JAML	protein_coding	10896.1	-1.35584	0.441006	-3.07442	0.00210911	0.0223224
ENSG00000165996	HACD1	protein_coding	33.5911	1.82349	0.593157	3.07421	0.00211064	0.0223265
ENSG00000075702	WDR62	protein_coding	19.2307	2.07733	0.675818	3.0738	0.00211352	0.0223417
ENSG00000123684	LPGAT1	protein_coding	1285.41	-1.27177	0.413761	-3.07368	0.00211434	0.0223417
ENSG00000147488	ST18	protein_coding	5.91834	4.53482	1.47579	3.07281	0.00212056	0.0223954
ENSG00000113761	ZNF346	protein_coding	273.512	0.958648	0.312126	3.07135	0.00213096	0.0224932
ENSG00000162616	DNAJB4	protein_coding	76.1217	1.42519	0.464066	3.0711	0.00213271	0.0224997
ENSG00000198848	CES1	protein_coding	72.7673	-2.40252	0.782375	-3.0708	0.00213483	0.02251
ENSG00000145287	PLAC8	protein_coding	1183.27	0.906133	0.295138	3.07021	0.00213912	0.022533
ENSG00000087086	FTL	protein_coding	102597	1.0718	0.349107	3.07012	0.00213971	0.022533
ENSG00000215717	TMEM167B	protein_coding	916.146	-1.21767	0.396641	-3.06996	0.00214089	0.022533
ENSG00000076356	PLXNA2	protein_coding	45.2737	-1.66618	0.542756	-3.06986	0.00214159	0.022533
ENSG00000088930	XRN2	protein_coding	1426.28	-1.04904	0.341785	-3.0693	0.0021456	0.022558
ENSG00000132825	PPP1R3D	protein_coding	488.512	-1.71665	0.559314	-3.06921	0.00214626	0.022558
ENSG00000185650	ZFP36L1	protein_coding	4655.51	-1.44655	0.471538	-3.06773	0.00215693	0.0226581
ENSG00000161980	POLR3K	protein_coding	147.871	1.53255	0.499656	3.06722	0.00216062	0.0226848
ENSG00000100154	TTC28	protein_coding	23.4942	1.8629	0.60741	3.06696	0.00216251	0.0226856
ENSG00000171916	LGALS9C	protein_coding	57.4509	-1.83238	0.597492	-3.06679	0.00216372	0.0226856
ENSG00000274209	ANTXRL	protein_coding	3.41492	4.98413	1.62523	3.06673	0.00216415	0.0226856
ENSG00000164674	SYTL3	protein_coding	343.597	-1.23039	0.401249	-3.06641	0.00216649	0.0226916
ENSG00000116157	GPX7	protein_coding	93.4413	1.17935	0.384621	3.06626	0.00216751	0.0226916
ENSG00000123454	DBH	protein_coding	19.1523	2.18473	0.71256	3.06602	0.00216926	0.0226916
ENSG00000224091	ENSG00000224091	lncRNA	8.10349	2.48211	0.809557	3.06601	0.00216933	0.0226916
ENSG00000106268	NUDT1	protein_coding	173.937	1.29361	0.421941	3.06585	0.00217049	0.0226917
ENSG00000123094	RASSF8	protein_coding	7.56884	3.3071	1.07924	3.06429	0.00218187	0.0227986
ENSG00000233029	ENSG00000233029	lncRNA	42.4387	-2.73494	0.892635	-3.06389	0.00218479	0.0228169
ENSG00000232818	RPS2P32	processed_pseudogene	25.2099	2.20493	0.719724	3.06358	0.00218708	0.0228288
ENSG00000269220	LINC00528	lncRNA	109.614	-1.02572	0.335	-3.06187	0.00219963	0.0229141
ENSG00000169397	RNASE3	protein_coding	231.986	3.42692	1.11924	3.06183	0.0021999	0.0229141
ENSG00000105643	ARRDC2	protein_coding	1006.57	0.901441	0.294414	3.06181	0.00220001	0.0229141
ENSG00000131669	NINJ1	protein_coding	1516.24	-1.43206	0.467715	-3.06181	0.00220003	0.0229141
ENSG00000108846	ABCC3	protein_coding	156.456	-2.53103	0.826721	-3.06152	0.00220214	0.0229141
ENSG00000171604	CXXC5	protein_coding	251.289	0.923613	0.301685	3.06151	0.00220223	0.0229141
ENSG00000171223	JUNB	protein_coding	3163.45	-1.48038	0.483581	-3.06127	0.00220397	0.0229157
ENSG00000172216	CEBPB	protein_coding	3833.45	-1.60479	0.524239	-3.06117	0.00220473	0.0229157
ENSG00000119125	GDA	protein_coding	25.7486	7.98151	2.60756	3.06091	0.00220666	0.0229157
ENSG00000198792	TMEM184B	protein_coding	451.117	-1.00142	0.32717	-3.06086	0.00220704	0.0229157
ENSG00000128594	LRRC4	protein_coding	481.114	-1.64072	0.536136	-3.06027	0.00221139	0.0229489
ENSG00000163026	WDCP	protein_coding	124.589	0.875212	0.286026	3.0599	0.00221412	0.0229543
ENSG00000160201	U2AF1	protein_coding	114.529	-1.08615	0.354964	-3.05988	0.00221425	0.0229543
ENSG00000118217	ATF6	protein_coding	1145.63	-1.41811	0.463549	-3.05924	0.00221903	0.0229918
ENSG00000255197	ENSG00000255197	lncRNA	882.495	-1.61388	0.527605	-3.05889	0.00222161	0.0229974
ENSG00000115484	CCT4	protein_coding	886.239	0.765916	0.250401	3.05876	0.00222256	0.0229974
ENSG00000154144	TBRG1	protein_coding	280.719	-0.689922	0.225568	-3.0586	0.00222375	0.0229974
ENSG00000176454	LPCAT4	protein_coding	179.859	-0.81598	0.266788	-3.05853	0.00222424	0.0229974
ENSG00000165716	DIPK1B	protein_coding	32.6392	1.64682	0.538526	3.05802	0.00222808	0.023025
ENSG00000136935	GOLGA1	protein_coding	217.424	-0.80825	0.264378	-3.05718	0.00223431	0.0230773
ENSG00000116489	CAPZA1	protein_coding	4035.49	-1.22808	0.401769	-3.05669	0.00223796	0.0231006
ENSG00000180549	FUT7	protein_coding	538.035	-1.88595	0.617016	-3.05656	0.0022389	0.0231006
ENSG00000107719	PALD1	protein_coding	7.86604	2.54719	0.833858	3.0547	0.00225287	0.0232325
ENSG00000110218	PANX1	protein_coding	37.5081	-1.44872	0.474358	-3.05407	0.00225761	0.0232692
ENSG00000163235	TGFA	protein_coding	441.545	-1.92646	0.630929	-3.05337	0.00226284	0.0233109
ENSG00000178977	LINC00324	lncRNA	117.687	-0.82541	0.270361	-3.053	0.00226568	0.0233279
ENSG00000163482	STK36	protein_coding	45.8079	-1.0621	0.347947	-3.05247	0.00226963	0.0233565
ENSG00000043462	LCP2	protein_coding	2616.59	-0.946791	0.31021	-3.0521	0.00227248	0.0233736
ENSG00000240005	STIM2-AS1	lncRNA	17.4239	2.22411	0.728822	3.05165	0.00227586	0.0233961
ENSG00000215244	LINC02649	lncRNA	79.7686	-2.19219	0.718453	-3.05126	0.00227881	0.0234052
ENSG00000234515	PPP1R2P1	transcribed_processed_pseudogene	3.65531	-4.00805	1.31359	-3.05122	0.00227916	0.0234052
ENSG00000101444	AHCY	protein_coding	431.171	1.23894	0.406069	3.05107	0.00228031	0.0234052
ENSG00000053372	MRTO4	protein_coding	175.757	0.937625	0.307353	3.05064	0.00228353	0.0234261
ENSG00000146094	DOK3	protein_coding	3540.3	-1.72426	0.565271	-3.05032	0.00228594	0.0234386
ENSG00000057252	SOAT1	protein_coding	698.798	-1.3593	0.445659	-3.05009	0.00228775	0.0234449
ENSG00000287346	ENSG00000287346	lncRNA	9.72913	2.28771	0.750142	3.04971	0.00229064	0.0234624
ENSG00000234436	ENSG00000234436	unprocessed_pseudogene	15.9032	-2.08674	0.684454	-3.04876	0.00229785	0.023511
ENSG00000188643	S100A16	protein_coding	11.3627	4.09989	1.34478	3.04874	0.00229804	0.023511
ENSG00000131759	RARA	protein_coding	1636.82	-1.47832	0.484924	-3.04856	0.00229943	0.023511
ENSG00000137648	TMPRSS4	protein_coding	9.01001	3.13255	1.02758	3.04846	0.00230016	0.023511
ENSG00000131724	IL13RA1	protein_coding	1964.66	-1.5989	0.524757	-3.04694	0.00231187	0.0236184
ENSG00000267480	LINC02979	lncRNA	18.7811	-1.76421	0.579095	-3.0465	0.00231522	0.0236405
ENSG00000139132	FGD4	protein_coding	320.841	-1.7879	0.587089	-3.04536	0.00232403	0.0237181
ENSG00000160200	CBS	protein_coding	7.65843	-2.92869	0.961887	-3.04474	0.00232881	0.0237546
ENSG00000138795	LEF1	protein_coding	1479.31	1.46664	0.481749	3.0444	0.00233147	0.0237695
ENSG00000114374	USP9Y	protein_coding	37.389	9.24982	3.03903	3.04368	0.00233704	0.0237838
ENSG00000105088	OLFM2	protein_coding	113.52	1.36944	0.449931	3.04366	0.00233717	0.0237838
ENSG00000226321	CROCC2	protein_coding	2.93841	-4.44401	1.46015	-3.04353	0.00233816	0.0237838
ENSG00000145284	SCD5	protein_coding	14.6631	-2.10321	0.691044	-3.04352	0.0023383	0.0237838
ENSG00000236345	SCAT8	lncRNA	37.4927	-1.82069	0.598268	-3.04327	0.00234023	0.0237838
ENSG00000269956	MKNK1-AS1	lncRNA	26.9032	-1.97164	0.647898	-3.04314	0.00234121	0.0237838
ENSG00000165304	MELK	protein_coding	17.6735	2.01286	0.661446	3.04313	0.00234133	0.0237838
ENSG00000068697	LAPTM4A	protein_coding	1333.67	-1.02418	0.336603	-3.04268	0.00234485	0.0238073
ENSG00000198189	HSD17B11	protein_coding	1956.35	-1.22781	0.403731	-3.04115	0.00235675	0.0239158
ENSG00000151651	ADAM8	protein_coding	3935.98	-1.44658	0.475767	-3.04052	0.00236168	0.0239535
ENSG00000257226	ENSG00000257226	lncRNA	4.54673	-3.69335	1.21495	-3.03992	0.00236637	0.0239888
ENSG00000126709	IFI6	protein_coding	860.352	-1.45772	0.47962	-3.03933	0.00237105	0.0240238
ENSG00000221937	TAS2R40	protein_coding	14.0964	-3.1709	1.04357	-3.03851	0.0023775	0.0240767
ENSG00000173660	UQCRH	protein_coding	699.843	0.899484	0.296128	3.03749	0.00238561	0.0241465
ENSG00000263368	MSANTD3P1	processed_pseudogene	7.89319	2.39805	0.789621	3.03697	0.0023897	0.0241755
ENSG00000164823	OSGIN2	protein_coding	293.189	-1.28275	0.422577	-3.03553	0.00240112	0.0242785
ENSG00000102287	GABRE	protein_coding	4.65135	3.28138	1.08111	3.03519	0.00240382	0.0242785
ENSG00000138623	SEMA7A	protein_coding	182.453	1.18208	0.389476	3.03505	0.00240498	0.0242785
ENSG00000150403	TMCO3	protein_coding	553.897	-1.35451	0.44629	-3.03504	0.00240507	0.0242785
ENSG00000160588	MPZL3	protein_coding	1123.71	-1.72642	0.568854	-3.03491	0.00240604	0.0242785
ENSG00000187531	SIRT7	protein_coding	623.299	-0.797587	0.262872	-3.03413	0.00241232	0.0243294
ENSG00000127947	PTPN12	protein_coding	976.704	-1.41312	0.465816	-3.03363	0.0024163	0.0243491
ENSG00000117758	STX12	protein_coding	385.166	-0.903576	0.297859	-3.03358	0.00241674	0.0243491
ENSG00000145012	LPP	protein_coding	390.781	-1.10768	0.365162	-3.0334	0.00241812	0.0243505
ENSG00000215440	NPEPL1	protein_coding	168.51	-1.18057	0.389246	-3.03297	0.00242163	0.0243681
ENSG00000178996	SNX18	protein_coding	837.801	-1.50156	0.495094	-3.03288	0.00242235	0.0243681
ENSG00000164136	IL15	protein_coding	45.27	-1.17159	0.386324	-3.03266	0.00242407	0.024373
ENSG00000185033	SEMA4B	protein_coding	741.164	-1.28452	0.423717	-3.03155	0.00243303	0.0244506
ENSG00000197971	MBP	protein_coding	3165.99	-1.16492	0.384312	-3.03119	0.00243592	0.0244672
ENSG00000086730	LAT2	protein_coding	2394.87	-1.42191	0.469222	-3.03035	0.00244274	0.0245128
ENSG00000204673	AKT1S1	protein_coding	614.975	1.17175	0.386674	3.03032	0.00244295	0.0245128
ENSG00000129933	MAU2	protein_coding	876.25	-0.83242	0.274745	-3.02979	0.00244726	0.0245435
ENSG00000167460	TPM4	protein_coding	2414.07	-0.924045	0.305053	-3.02913	0.00245258	0.0245844
ENSG00000211696	TRGV8	TR_V_gene	20.2881	-1.6829	0.555668	-3.02861	0.00245684	0.0246077
ENSG00000288156	ENSG00000288156	lncRNA	545.038	-1.28323	0.423714	-3.02854	0.0024574	0.0246077
ENSG00000213553	RPLP0P6	processed_pseudogene	678.611	1.08293	0.357625	3.0281	0.00246093	0.0246306
ENSG00000003402	CFLAR	protein_coding	6047.56	-1.50454	0.496886	-3.02794	0.00246226	0.0246314
ENSG00000263961	RHEX	protein_coding	5.48153	2.62686	0.868104	3.02598	0.00247832	0.0247669
ENSG00000239405	TMED10P2	processed_pseudogene	2.34556	5.21652	1.72406	3.02572	0.00248038	0.0247669
ENSG00000251259	ENSG00000251259	lncRNA	48.9755	-1.88762	0.62387	-3.02567	0.00248084	0.0247669
ENSG00000214113	LYRM4	protein_coding	135.315	1.06657	0.352507	3.02567	0.00248084	0.0247669
ENSG00000196338	NLGN3	protein_coding	76.6697	-1.41155	0.466807	-3.02384	0.00249588	0.0248916
ENSG00000243055	GK-AS1	lncRNA	26.767	-2.09439	0.692657	-3.0237	0.00249701	0.0248916
ENSG00000186806	VSIG10L	protein_coding	6.58264	-2.78242	0.920222	-3.02364	0.00249753	0.0248916
ENSG00000131828	PDHA1	protein_coding	367.588	0.698706	0.231089	3.02354	0.00249838	0.0248916
ENSG00000197930	ERO1A	protein_coding	836.908	-1.10273	0.364781	-3.02299	0.00250291	0.0249141
ENSG00000058799	YIPF1	protein_coding	627.684	-1.28224	0.424166	-3.02296	0.00250317	0.0249141
ENSG00000104763	ASAH1	protein_coding	3444.72	-1.36279	0.450915	-3.02227	0.00250888	0.0249584
ENSG00000101546	RBFA	protein_coding	60.1095	0.925736	0.306363	3.0217	0.00251361	0.0249823
ENSG00000029153	BMAL2	protein_coding	20.0516	2.23866	0.740867	3.02167	0.00251382	0.0249823
ENSG00000109466	KLHL2	protein_coding	775.752	-2.02159	0.669145	-3.02115	0.00251819	0.0250131
ENSG00000233093	LINC00892	lncRNA	10.3103	-2.12046	0.702487	-3.0185	0.00254026	0.0252196
ENSG00000221988	PPT2	protein_coding	33.2516	1.47996	0.49036	3.0181	0.00254361	0.0252402
ENSG00000114767	RRP9	protein_coding	101.417	0.865936	0.286974	3.01747	0.00254892	0.0252801
ENSG00000279330	ENSG00000279330	TEC	32.929	-1.36703	0.453106	-3.01701	0.0025528	0.0253059
ENSG00000289039	ENSG00000289039	lncRNA	292.575	-2.0972	0.695222	-3.01659	0.00255638	0.0253287
ENSG00000198898	CAPZA2	protein_coding	1740.4	-1.53303	0.508246	-3.01631	0.00255875	0.025333
ENSG00000184785	SMIM10	protein_coding	8.38251	2.07094	0.686598	3.01623	0.0025594	0.025333
ENSG00000128641	MYO1B	protein_coding	23.6046	1.75113	0.580638	3.01588	0.00256237	0.0253477
ENSG00000114268	PFKFB4	protein_coding	930.19	-1.52541	0.505814	-3.01575	0.00256346	0.0253477
ENSG00000171206	TRIM8	protein_coding	1036.01	-1.23824	0.410617	-3.01556	0.00256507	0.0253478
ENSG00000109927	TECTA	protein_coding	19.1155	2.18272	0.723847	3.01544	0.00256603	0.0253478
ENSG00000170525	PFKFB3	protein_coding	1822.2	-2.093	0.69447	-3.0138	0.00257997	0.0254648
ENSG00000115271	GCA	protein_coding	9811.88	-1.96266	0.651237	-3.01374	0.00258046	0.0254648
ENSG00000143622	RIT1	protein_coding	776.505	-1.34552	0.446587	-3.01289	0.00258771	0.0255235
[truncated: 887 more rows]

## Sheet: Table S8
Table S8. Gene expression fold changes between umbilical cord blood and maternal venous blood (C vs M) in both HEU and HUU groups.
Ensembl	Symbol	Type	log2FoldChange (HEU C vs M)	log2FoldChange (HUU C vs M)	△log2FC	Regulation
ENSG00000000971	CFH	protein_coding	-3.42527	-1.47087	-1.9544	down
ENSG00000001617	SEMA3F	protein_coding	3.70444	0.895419	2.80902	up
ENSG00000002549	LAP3	protein_coding	-0.881621	-1.72676	0.845141	up
ENSG00000003436	TFPI	protein_coding	2.55022	1.85346	0.696758	up
ENSG00000003989	SLC7A2	protein_coding	7.07418	1.97888	5.0953	up
ENSG00000004468	CD38	protein_coding	1.32147	-0.182366	1.50384	up
ENSG00000004799	PDK4	protein_coding	-2.46744	-3.50877	1.04133	up
ENSG00000004809	SLC22A16	protein_coding	1.81187	1.0764	0.73547	up
ENSG00000005020	SKAP2	protein_coding	-1.8591	-0.566668	-1.29243	down
ENSG00000005108	THSD7A	protein_coding	7.45219	3.4784	3.97379	up
ENSG00000005243	COPZ2	protein_coding	-0.0888548	-1.99361	1.90475	up
ENSG00000005302	MSL3	protein_coding	-1.34249	-0.584882	-0.757612	down
ENSG00000005381	MPO	protein_coding	5.61639	4.46644	1.14995	up
ENSG00000006118	TMEM132A	protein_coding	2.52744	0.737256	1.79018	up
ENSG00000006327	TNFRSF12A	protein_coding	0.482134	-0.65289	1.13502	up
ENSG00000006453	BAIAP2L1	protein_coding	1.04714	-0.781918	1.82906	up
ENSG00000006555	TTC22	protein_coding	-1.07645	-1.71087	0.634419	up
ENSG00000006652	IFRD1	protein_coding	-1.6223	-0.976373	-0.645922	down
ENSG00000007062	PROM1	protein_coding	5.80451	3.29788	2.50663	up
ENSG00000007264	MATK	protein_coding	0.239781	-0.674401	0.914181	up
ENSG00000007350	TKTL1	protein_coding	-0.13765	-1.0258	0.888152	up
ENSG00000007384	RHBDF1	protein_coding	4.06592	0.902193	3.16372	up
ENSG00000007541	PIGQ	protein_coding	1.98486	1.28023	0.704627	up
ENSG00000008056	SYN1	protein_coding	2.5927	1.38231	1.2104	up
ENSG00000008226	DLEC1	protein_coding	-1.39036	-0.325848	-1.06451	down
ENSG00000008283	CYB561	protein_coding	-1.5693	-2.33813	0.768831	up
ENSG00000008311	AASS	protein_coding	-0.710416	-1.30264	0.59222	up
ENSG00000008323	PLEKHG6	protein_coding	2.66999	-1.09205	3.76204	up
ENSG00000008441	NFIX	protein_coding	2.45119	1.65902	0.792164	up
ENSG00000008517	IL32	protein_coding	-0.156164	-0.876165	0.72	up
ENSG00000010030	ETV7	protein_coding	-1.6265	-3.60486	1.97836	up
ENSG00000010278	CD9	protein_coding	0.358107	1.12099	-0.762881	down
ENSG00000010404	IDS	protein_coding	-1.55005	-0.838464	-0.711581	down
ENSG00000010704	HFE	protein_coding	-1.26415	-0.450391	-0.813761	down
ENSG00000011028	MRC2	protein_coding	3.04741	2.04258	1.00483	up
ENSG00000011105	TSPAN9	protein_coding	-1.36573	-0.513345	-0.852381	down
ENSG00000011201	ANOS1	protein_coding	-2.61794	-3.44388	0.825941	up
ENSG00000011347	SYT7	protein_coding	7.00172	-0.166136	7.16785	up
ENSG00000011426	ANLN	protein_coding	3.4831	2.0363	1.4468	up
ENSG00000011465	DCN	protein_coding	5.13379	0.316269	4.81752	up
ENSG00000012124	CD22	protein_coding	0.429519	1.01976	-0.59024	down
ENSG00000012171	SEMA3B	protein_coding	3.35262	-0.368617	3.72124	up
ENSG00000012223	LTF	protein_coding	4.65772	1.76095	2.89677	up
ENSG00000012779	ALOX5	protein_coding	-1.4217	-0.662059	-0.759646	down
ENSG00000013573	DDX11	protein_coding	1.38273	0.643575	0.739159	up
ENSG00000013619	MAMLD1	protein_coding	-2.51377	-0.388605	-2.12517	down
ENSG00000018280	SLC11A1	protein_coding	-1.52718	-0.840228	-0.686948	down
ENSG00000018408	WWTR1	protein_coding	2.52845	-0.0254068	2.55385	up
ENSG00000019102	VSIG2	protein_coding	-1.85539	-1.08475	-0.770638	down
ENSG00000020181	ADGRA2	protein_coding	0.204804	0.895591	-0.690787	down
ENSG00000020577	SAMD4A	protein_coding	-0.93781	-1.52553	0.587719	up
ENSG00000021762	OSBPL5	protein_coding	-0.242362	-0.902468	0.660106	up
ENSG00000023171	GRAMD1B	protein_coding	0.384123	-0.247438	0.631562	up
ENSG00000024526	DEPDC1	protein_coding	3.7974	2.62449	1.17291	up
ENSG00000026297	RNASET2	protein_coding	-1.24067	-0.549466	-0.691201	down
ENSG00000026559	KCNG1	protein_coding	-1.48889	-4.91989	3.431	up
ENSG00000026751	SLAMF7	protein_coding	-1.5799	-2.51853	0.93863	up
ENSG00000027697	IFNGR1	protein_coding	-1.59135	-0.731072	-0.860282	down
ENSG00000027869	SH2D2A	protein_coding	-0.278634	-1.83306	1.55442	up
ENSG00000029153	BMAL2	protein_coding	2.23866	0.628685	1.60997	up
ENSG00000029534	ANK1	protein_coding	2.36371	1.75752	0.606187	up
ENSG00000029993	HMGB3	protein_coding	4.9197	1.55584	3.36386	up
ENSG00000033327	GAB2	protein_coding	-2.03483	-1.35342	-0.681403	down
ENSG00000035403	VCL	protein_coding	-0.912575	-0.317794	-0.594782	down
ENSG00000035499	DEPDC1B	protein_coding	4.45938	1.4806	2.97877	up
ENSG00000036448	MYOM2	protein_coding	2.39859	-0.293845	2.69243	up
ENSG00000037280	FLT4	protein_coding	-0.700779	-3.01079	2.31001	up
ENSG00000038427	VCAN	protein_coding	-1.46795	-0.391712	-1.07623	down
ENSG00000038945	MSR1	protein_coding	-2.20877	-2.93306	0.724286	up
ENSG00000039068	CDH1	protein_coding	2.85184	2.17774	0.674106	up
ENSG00000039560	RAI14	protein_coding	6.53016	0.793697	5.73646	up
ENSG00000042832	TG	protein_coding	-1.63719	-0.402281	-1.23491	down
ENSG00000042980	ADAM28	protein_coding	-1.24351	-0.581813	-0.661697	down
ENSG00000046604	DSG2	protein_coding	2.66616	1.60058	1.06557	up
ENSG00000047578	KATNIP	protein_coding	-1.36642	-0.684435	-0.681989	down
ENSG00000047648	ARHGAP6	protein_coding	-0.507076	0.482286	-0.989362	down
ENSG00000047662	FAM184B	protein_coding	-1.51044	-0.560963	-0.949479	down
ENSG00000048462	TNFRSF17	protein_coding	-2.57714	-1.29054	-1.2866	down
ENSG00000049089	COL9A2	protein_coding	-1.30274	0.980871	-2.28361	down
ENSG00000049192	ADAMTS6	protein_coding	0.541908	1.27487	-0.732965	down
ENSG00000049323	LTBP1	protein_coding	0.257272	1.10022	-0.842946	down
ENSG00000049449	RCN1	protein_coding	0.072935	-0.712699	0.785634	up
ENSG00000049540	ELN	protein_coding	5.98922	0.91388	5.07534	up
ENSG00000050820	BCAR1	protein_coding	5.55701	0.71863	4.83838	up
ENSG00000051180	RAD51	protein_coding	2.54812	1.57608	0.972039	up
ENSG00000051341	POLQ	protein_coding	2.71979	1.63076	1.08903	up
ENSG00000052344	PRSS8	protein_coding	2.6474	0.176071	2.47133	up
ENSG00000053438	NNAT	protein_coding	1.34088	-0.379665	1.72055	up
ENSG00000053524	MCF2L2	protein_coding	-2.03188	-0.945098	-1.08678	down
ENSG00000054148	PHPT1	protein_coding	0.790793	0.117717	0.673076	up
ENSG00000054179	ENTPD2	protein_coding	0.171554	1.57631	-1.40476	down
ENSG00000054523	KIF1B	protein_coding	-1.59063	-0.860445	-0.73019	down
ENSG00000054690	PLEKHH1	protein_coding	2.70131	0.610734	2.09057	up
ENSG00000054967	RELT	protein_coding	-1.17331	-0.514433	-0.658878	down
ENSG00000055130	CUL1	protein_coding	0.121551	-0.592204	0.713754	up
ENSG00000055957	ITIH1	protein_coding	-3.33756	0.0490553	-3.38662	down
ENSG00000057294	PKP2	protein_coding	2.51788	1.43728	1.08059	up
ENSG00000057704	TMCC3	protein_coding	-1.75715	-1.12869	-0.628452	down
ENSG00000058085	LAMC2	protein_coding	3.89389	0.922275	2.97162	up
ENSG00000059378	PARP12	protein_coding	-0.245315	-0.876515	0.6312	up
ENSG00000059728	MXD1	protein_coding	-1.97796	-1.32585	-0.652109	down
ENSG00000060709	RIMBP2	protein_coding	3.3876	5.16661	-1.77902	down
ENSG00000060982	BCAT1	protein_coding	-1.30186	-0.593502	-0.708356	down
ENSG00000061656	SPAG4	protein_coding	-0.0183079	1.18386	-1.20217	down
ENSG00000062716	VMP1	protein_coding	-1.94208	-1.05348	-0.888594	down
ENSG00000064012	CASP8	protein_coding	-1.74314	-0.964572	-0.778563	down
ENSG00000064270	ATP2C2	protein_coding	3.35307	1.70987	1.6432	up
ENSG00000064651	SLC12A2	protein_coding	0.968401	0.284229	0.684172	up
ENSG00000064989	CALCRL	protein_coding	-0.0316827	1.11272	-1.1444	down
ENSG00000065328	MCM10	protein_coding	2.91839	1.81018	1.1082	up
ENSG00000065559	MAP2K4	protein_coding	-1.19648	-0.501099	-0.695386	down
ENSG00000065615	CYB5R4	protein_coding	-1.70956	-0.895736	-0.813823	down
ENSG00000065618	COL17A1	protein_coding	4.06908	2.2724	1.79668	up
ENSG00000065717	TLE2	protein_coding	1.78818	0.783051	1.00513	up
ENSG00000065833	ME1	protein_coding	-1.6518	-0.401494	-1.2503	down
ENSG00000066230	SLC9A3	protein_coding	-0.383437	1.22676	-1.61019	down
ENSG00000066279	ASPM	protein_coding	3.07549	1.48613	1.58936	up
ENSG00000066336	SPI1	protein_coding	-1.37819	-0.74453	-0.633661	down
ENSG00000066382	MPPED2	protein_coding	3.01012	0.513796	2.49633	up
ENSG00000066735	KIF26A	protein_coding	3.27849	1.8862	1.39228	up
ENSG00000066827	ZFAT	protein_coding	1.15885	0.330619	0.828231	up
ENSG00000066926	FECH	protein_coding	3.9496	2.92177	1.02784	up
ENSG00000067064	IDI1	protein_coding	-1.23997	-0.343189	-0.896778	down
ENSG00000067082	KLF6	protein_coding	-1.60072	-0.634269	-0.966451	down
ENSG00000067141	NEO1	protein_coding	-1.16616	-1.97843	0.812266	up
ENSG00000067177	PHKA1	protein_coding	3.12007	1.25089	1.86918	up
ENSG00000067715	SYT1	protein_coding	1.05088	1.84096	-0.790086	down
ENSG00000067840	PDZD4	protein_coding	-2.11219	-2.72119	0.609004	up
ENSG00000068024	HDAC4	protein_coding	-0.828597	-0.221858	-0.60674	down
ENSG00000068079	IFI35	protein_coding	-0.477002	-1.29846	0.821454	up
ENSG00000068615	REEP1	protein_coding	0.10338	1.40472	-1.30134	down
ENSG00000069702	TGFBR3	protein_coding	-1.44684	-2.74387	1.29703	up
ENSG00000069943	PIGB	protein_coding	-1.30948	-0.69556	-0.613917	down
ENSG00000069974	RAB27A	protein_coding	-1.04371	-0.457628	-0.586084	down
ENSG00000070087	PFN2	protein_coding	2.18569	-0.0188695	2.20456	up
ENSG00000070159	PTPN3	protein_coding	3.04859	-0.176947	3.22554	up
ENSG00000070190	DAPP1	protein_coding	-1.64168	-1.019	-0.62268	down
ENSG00000070269	TMEM260	protein_coding	-1.20172	-0.586186	-0.615533	down
ENSG00000070444	MNT	protein_coding	-1.18163	-0.473733	-0.707894	down
ENSG00000070731	ST6GALNAC2	protein_coding	-1.96435	-0.740304	-1.22405	down
ENSG00000070778	PTPN21	protein_coding	3.97792	-1.39709	5.37501	up
ENSG00000070985	TRPM5	protein_coding	2.29289	1.68366	0.609235	up
ENSG00000071282	LMCD1	protein_coding	2.43736	-0.18685	2.62421	up
ENSG00000071539	TRIP13	protein_coding	2.7337	1.61912	1.11458	up
ENSG00000071655	MBD3	protein_coding	0.924709	0.331632	0.593076	up
ENSG00000071967	CYBRD1	protein_coding	-0.360266	0.478042	-0.838309	down
ENSG00000072401	UBE2D1	protein_coding	-1.98927	-0.771157	-1.21812	down
ENSG00000072571	HMMR	protein_coding	3.47286	1.69968	1.77318	up
ENSG00000072952	IRAG1	protein_coding	-1.69857	-0.889342	-0.809225	down
ENSG00000073008	PVR	protein_coding	-0.145581	0.785818	-0.931399	down
ENSG00000073111	MCM2	protein_coding	2.21938	1.54561	0.673766	up
ENSG00000073146	MOV10L1	protein_coding	2.96371	2.17945	0.784257	up
ENSG00000073150	PANX2	protein_coding	-2.18804	-1.50389	-0.684152	down
ENSG00000073331	ALPK1	protein_coding	-1.55342	-0.90168	-0.651744	down
ENSG00000073712	FERMT2	protein_coding	3.9876	0.490045	3.49755	up
ENSG00000073756	PTGS2	protein_coding	-2.05199	-1.23156	-0.82043	down
ENSG00000073861	TBX21	protein_coding	-0.982568	-2.31984	1.33727	up
ENSG00000074219	TEAD2	protein_coding	0.25209	0.977003	-0.724913	down
ENSG00000074966	TXK	protein_coding	0.967352	-0.0773133	1.04466	up
ENSG00000075213	SEMA3A	protein_coding	2.67259	1.1683	1.50428	up
ENSG00000075218	GTSE1	protein_coding	2.34548	1.62598	0.719501	up
ENSG00000075223	SEMA3C	protein_coding	-1.90349	-1.08054	-0.822948	down
ENSG00000075234	TTC38	protein_coding	-0.131055	-1.47054	1.33949	up
ENSG00000075340	ADD2	protein_coding	2.54099	1.80721	0.733779	up
ENSG00000075391	RASAL2	protein_coding	1.95336	0.597282	1.35608	up
ENSG00000075420	FNDC3B	protein_coding	-1.92064	-1.25832	-0.662321	down
ENSG00000075426	FOSL2	protein_coding	-2.07347	-1.27305	-0.800424	down
ENSG00000075702	WDR62	protein_coding	2.07733	0.850502	1.22683	up
ENSG00000076356	PLXNA2	protein_coding	-1.66618	-0.956638	-0.709546	down
ENSG00000076382	SPAG5	protein_coding	1.75545	1.04364	0.711818	up
ENSG00000076826	CAMSAP3	protein_coding	2.36282	1.53155	0.831271	up
ENSG00000077044	DGKD	protein_coding	-0.425221	0.247213	-0.672434	down
ENSG00000077238	IL4R	protein_coding	-1.76355	-0.733578	-1.02998	down
ENSG00000077264	PAK3	protein_coding	2.60902	-2.46225	5.07127	up
ENSG00000077782	FGFR1	protein_coding	-0.925055	-0.241489	-0.683566	down
ENSG00000077935	SMC1B	protein_coding	2.05779	0.048992	2.0088	up
ENSG00000077942	FBLN1	protein_coding	8.54216	1.33715	7.205	up
ENSG00000078081	LAMP3	protein_coding	0.0420177	-0.768618	0.810636	up
ENSG00000078114	NEBL	protein_coding	2.65747	0.801605	1.85587	up
ENSG00000078401	EDN1	protein_coding	-0.626937	0.541297	-1.16823	down
ENSG00000078487	ZCWPW1	protein_coding	-0.91637	-0.18111	-0.73526	down
ENSG00000079277	MKNK1	protein_coding	-1.7196	-0.898322	-0.821281	down
ENSG00000079308	TNS1	protein_coding	2.14607	1.53368	0.612392	up
ENSG00000080493	SLC4A4	protein_coding	-0.786043	-1.45214	0.666101	up
ENSG00000080561	MID2	protein_coding	-3.31152	-5.4108	2.09928	up
ENSG00000080823	MOK	protein_coding	-0.639175	0.695116	-1.33429	down
ENSG00000080986	NDC80	protein_coding	0.959384	0.28726	0.672124	up
ENSG00000081026	MAGI3	protein_coding	0.289154	0.875875	-0.586722	down
ENSG00000081052	COL4A4	protein_coding	0.0255178	-0.720753	0.746271	up
ENSG00000081237	PTPRC	protein_coding	-1.19789	-0.599515	-0.598374	down
ENSG00000081320	STK17B	protein_coding	-0.999076	-0.343905	-0.655171	down
ENSG00000081985	IL12RB2	protein_coding	0.415226	-0.794242	1.20947	up
ENSG00000082438	COBLL1	protein_coding	2.29579	-0.327204	2.62299	up
ENSG00000082458	DLG3	protein_coding	-0.653196	-1.9179	1.2647	up
ENSG00000082781	ITGB5	protein_coding	-1.5763	-0.766748	-0.809554	down
ENSG00000082996	RNF13	protein_coding	-1.91647	-1.0316	-0.884863	down
ENSG00000084110	HAL	protein_coding	-2.05246	-0.936613	-1.11584	down
ENSG00000084112	SSH1	protein_coding	-1.64018	-0.806414	-0.833766	down
ENSG00000084207	GSTP1	protein_coding	0.806238	0.137946	0.668292	up
ENSG00000084444	FAM234B	protein_coding	0.991729	0.35406	0.637669	up
ENSG00000084731	KIF3C	protein_coding	-1.2494	-0.359313	-0.890085	down
ENSG00000085563	ABCB1	protein_coding	0.257591	-0.768005	1.0256	up
ENSG00000085662	AKR1B1	protein_coding	0.968047	-0.049156	1.0172	up
ENSG00000085831	TTC39A	protein_coding	2.78128	1.96192	0.819362	up
ENSG00000085999	RAD54L	protein_coding	2.14155	1.03404	1.10751	up
ENSG00000086289	EPDR1	protein_coding	1.97769	1.35487	0.622819	up
ENSG00000086300	SNX10	protein_coding	-1.73485	-0.843556	-0.891297	down
ENSG00000086548	CEACAM6	protein_coding	4.85012	2.59279	2.25734	up
ENSG00000087076	HSD17B14	protein_coding	2.65614	-0.0459433	2.70208	up
ENSG00000087116	ADAMTS2	protein_coding	-5.84486	-0.0433825	-5.80147	down
ENSG00000087157	PGS1	protein_coding	-1.78609	-1.10187	-0.684224	down
ENSG00000087245	MMP2	protein_coding	4.52724	0.633047	3.89419	up
ENSG00000087253	LPCAT2	protein_coding	-1.56763	-0.970459	-0.597171	down
ENSG00000087303	NID2	protein_coding	-0.101169	0.701	-0.802169	down
ENSG00000087589	CASS4	protein_coding	-1.68104	-1.08589	-0.595158	down
ENSG00000087903	RFX2	protein_coding	-1.33583	0.0615186	-1.39735	down
ENSG00000088256	GNA11	protein_coding	1.68993	0.849895	0.840031	up
ENSG00000088305	DNMT3B	protein_coding	1.08266	2.03924	-0.956579	down
ENSG00000088325	TPX2	protein_coding	2.97957	1.7301	1.24947	up
ENSG00000088367	EPB41L1	protein_coding	3.78088	0.957459	2.82342	up
ENSG00000088538	DOCK3	protein_coding	-1.82824	-2.79877	0.970528	up
ENSG00000088827	SIGLEC1	protein_coding	-1.66423	-2.3715	0.70727	up
ENSG00000088854	DNAAF9	protein_coding	-0.935259	-0.339737	-0.595522	down
ENSG00000089091	DZANK1	protein_coding	-1.23122	-0.604245	-0.626975	down
ENSG00000089127	OAS1	protein_coding	-0.77947	-1.49755	0.718084	up
ENSG00000089163	SIRT4	protein_coding	0.0798747	0.823266	-0.743392	down
ENSG00000089472	HEPH	protein_coding	-3.44798	-1.33467	-2.11331	down
ENSG00000089685	BIRC5	protein_coding	3.01488	1.55087	1.46401	up
ENSG00000089692	LAG3	protein_coding	-3.04824	-4.83988	1.79164	up
ENSG00000089847	ANKRD24	protein_coding	1.58011	0.161696	1.41841	up
ENSG00000089876	DHX32	protein_coding	0.730284	0.051264	0.67902	up
ENSG00000090104	RGS1	protein_coding	1.10797	-1.51911	2.62708	up
ENSG00000090376	IRAK3	protein_coding	-1.23179	-0.361905	-0.869889	down
ENSG00000090382	LYZ	protein_coding	-1.32242	-0.21118	-1.11124	down
ENSG00000090659	CD209	protein_coding	-0.429067	-1.92263	1.49357	up
ENSG00000090889	KIF4A	protein_coding	3.28458	1.78231	1.50228	up
ENSG00000091039	OSBPL8	protein_coding	-1.05675	-0.417185	-0.639563	down
ENSG00000091181	IL5RA	protein_coding	0.487565	1.71829	-1.23073	down
ENSG00000091317	CMTM6	protein_coding	-1.57128	-0.720369	-0.850907	down
ENSG00000091513	TF	protein_coding	3.5874	4.8693	-1.2819	down
ENSG00000091592	NLRP1	protein_coding	-0.950911	-0.364559	-0.586352	down
ENSG00000091651	ORC6	protein_coding	2.12864	1.16734	0.961299	up
ENSG00000091972	CD200	protein_coding	2.07813	0.852531	1.2256	up
ENSG00000092036	HAUS4	protein_coding	-1.43579	-0.776088	-0.6597	down
ENSG00000092067	CEBPE	protein_coding	2.648	1.89454	0.75346	up
ENSG00000092068	SLC7A8	protein_coding	2.59623	1.51587	1.08036	up
ENSG00000092200	RPGRIP1	protein_coding	-1.30048	-0.615577	-0.6849	down
ENSG00000092421	SEMA6A	protein_coding	1.77568	0.938674	0.83701	up
ENSG00000092529	CAPN3	protein_coding	-0.355256	0.60679	-0.962046	down
ENSG00000092853	CLSPN	protein_coding	1.88185	0.900474	0.981372	up
ENSG00000093009	CDC45	protein_coding	2.77783	1.53455	1.24328	up
ENSG00000094804	CDC6	protein_coding	2.16949	1.48793	0.681555	up
ENSG00000095303	PTGS1	protein_coding	-1.62884	-0.463585	-1.16525	down
ENSG00000095370	SH2D3C	protein_coding	-1.02205	-0.42172	-0.600329	down
ENSG00000095397	WHRN	protein_coding	-1.83295	-0.274929	-1.55802	down
ENSG00000095637	SORBS1	protein_coding	3.54409	2.88403	0.660061	up
ENSG00000096006	CRISP3	protein_coding	3.59041	1.92857	1.66185	up
ENSG00000096063	SRPK1	protein_coding	-1.87768	-1.09825	-0.779436	down
ENSG00000096093	EFHC1	protein_coding	-0.401992	0.391915	-0.793906	down
ENSG00000096696	DSP	protein_coding	2.29208	1.30858	0.983507	up
ENSG00000097033	SH3GLB1	protein_coding	-1.61757	-0.73551	-0.882058	down
ENSG00000097096	SYDE2	protein_coding	0.809842	-1.61959	2.42943	up
ENSG00000099256	PRTFDC1	protein_coding	-0.738661	0.655002	-1.39366	down
ENSG00000099889	ARVCF	protein_coding	1.6018	0.0179969	1.5838	up
ENSG00000099953	MMP11	protein_coding	3.07119	1.28826	1.78294	up
ENSG00000099954	CECR2	protein_coding	1.34007	2.0136	-0.673528	down
ENSG00000099985	OSM	protein_coding	-2.21578	-1.56839	-0.647389	down
ENSG00000100012	SEC14L3	protein_coding	2.59768	1.33327	1.26441	up
ENSG00000100031	GGT1	protein_coding	-1.81481	-0.924093	-0.89072	down
ENSG00000100055	CYTH4	protein_coding	-1.33175	-0.740254	-0.5915	down
ENSG00000100079	LGALS2	protein_coding	-0.441346	0.660363	-1.10171	down
ENSG00000100162	CENPM	protein_coding	2.43048	1.17064	1.25984	up
ENSG00000100206	DMC1	protein_coding	4.91928	3.11675	1.80253	up
ENSG00000100228	RAB36	protein_coding	-1.23149	-0.366895	-0.864599	down
ENSG00000100234	TIMP3	protein_coding	5.29576	2.71579	2.57998	up
ENSG00000100266	PACSIN2	protein_coding	-1.35976	-0.689573	-0.670188	down
ENSG00000100288	CHKB	protein_coding	-1.32191	-0.0333477	-1.28856	down
ENSG00000100290	BIK	protein_coding	-1.18674	0.0953495	-1.28209	down
ENSG00000100298	APOBEC3H	protein_coding	-1.87061	-2.53811	0.667505	up
ENSG00000100320	RBFOX2	protein_coding	2.90912	1.11747	1.79165	up
ENSG00000100336	APOL4	protein_coding	1.02352	-3.8019	4.82542	up
ENSG00000100342	APOL1	protein_coding	-1.64062	-2.44894	0.808317	up
ENSG00000100359	SGSM3	protein_coding	-0.251102	0.619002	-0.870104	down
ENSG00000100368	CSF2RB	protein_coding	-1.54502	-0.848314	-0.696711	down
ENSG00000100385	IL2RB	protein_coding	-0.0889737	-1.38183	1.29286	up
ENSG00000100427	MLC1	protein_coding	1.83239	0.502876	1.32952	up
ENSG00000100448	CTSG	protein_coding	6.54207	4.17968	2.36239	up
ENSG00000100450	GZMH	protein_coding	-2.22622	-3.86497	1.63874	up
ENSG00000100453	GZMB	protein_coding	0.104543	-2.6724	2.77695	up
ENSG00000100473	COCH	protein_coding	-2.39658	-1.57581	-0.820766	down
ENSG00000100479	POLE2	protein_coding	2.41233	0.791569	1.62076	up
ENSG00000100483	VCPKMT	protein_coding	-1.65138	-0.734228	-0.917154	down
ENSG00000100485	SOS2	protein_coding	-1.37989	-0.699338	-0.680557	down
ENSG00000100504	PYGL	protein_coding	-1.3819	-0.652395	-0.72951	down
ENSG00000100505	TRIM9	protein_coding	-2.63465	-1.94688	-0.687765	down
ENSG00000100526	CDKN3	protein_coding	2.37289	1.5539	0.818994	up
ENSG00000100580	TMED8	protein_coding	-1.24468	-0.335408	-0.909272	down
ENSG00000100678	SLC8A3	protein_coding	-0.325629	1.07182	-1.39745	down
ENSG00000100721	TCL1A	protein_coding	1.77895	2.75616	-0.977215	down
ENSG00000100744	GSKIP	protein_coding	0.200551	1.03585	-0.835298	down
ENSG00000100767	PAPLN	protein_coding	-1.5746	-0.520307	-1.05429	down
ENSG00000100804	PSMB5	protein_coding	0.934267	0.193674	0.740593	up
ENSG00000100911	PSME2	protein_coding	-0.0933418	-1.09168	0.998342	up
ENSG00000101000	PROCR	protein_coding	0.398368	-0.519007	0.917375	up
ENSG00000101057	MYBL2	protein_coding	2.77309	2.05442	0.71867	up
ENSG00000101076	HNF4A	protein_coding	5.12567	6.71014	-1.58447	down
ENSG00000101104	PABPC1L	protein_coding	-0.534957	0.077262	-0.612219	down
ENSG00000101115	SALL4	protein_coding	0.138797	1.12339	-0.984593	down
ENSG00000101162	TUBB1	protein_coding	-1.34526	-0.486811	-0.85845	down
ENSG00000101187	SLCO4A1	protein_coding	2.28161	0.881491	1.40012	up
ENSG00000101188	NTSR1	protein_coding	-0.488372	0.854572	-1.34294	down
ENSG00000101236	RNF24	protein_coding	-2.02798	-1.31263	-0.715347	down
ENSG00000101265	RASSF2	protein_coding	-1.419	-0.733872	-0.685133	down
ENSG00000101333	PLCB4	protein_coding	4.15846	2.35492	1.80354	up
ENSG00000101335	MYL9	protein_coding	-1.57381	-0.401565	-1.17225	down
ENSG00000101412	E2F1	protein_coding	0.854142	1.99565	-1.14151	down
ENSG00000101425	BPI	protein_coding	4.52753	2.42241	2.10511	up
ENSG00000101444	AHCY	protein_coding	1.23894	0.608207	0.630735	up
ENSG00000101558	VAPA	protein_coding	-1.07708	-0.356205	-0.720873	down
ENSG00000101605	MYOM1	protein_coding	-0.154776	0.505397	-0.660173	down
ENSG00000101624	CEP76	protein_coding	1.23691	0.625656	0.611251	up
ENSG00000101846	STS	protein_coding	0.325995	-1.30074	1.62673	up
ENSG00000101856	PGRMC1	protein_coding	-1.82706	-0.507488	-1.31957	down
ENSG00000101935	AMMECR1	protein_coding	0.907351	0.072692	0.834659	up
ENSG00000102024	PLS3	protein_coding	2.0511	1.07008	0.981016	up
ENSG00000102038	SMARCA1	protein_coding	3.19003	1.15186	2.03818	up
ENSG00000102048	ASB9	protein_coding	1.74715	3.22677	-1.47962	down
ENSG00000102057	KCND1	protein_coding	-1.48346	-0.335946	-1.14752	down
ENSG00000102109	PCSK1N	protein_coding	-0.830017	-1.86628	1.03626	up
ENSG00000102172	SMS	protein_coding	0.347032	-0.269929	0.616962	up
ENSG00000102218	RP2	protein_coding	-1.37603	-0.735791	-0.640236	down
ENSG00000102384	CENPI	protein_coding	2.03184	0.976656	1.05518	up
ENSG00000102385	DRP2	protein_coding	2.76726	1.43801	1.32925	up
ENSG00000102409	BEX4	protein_coding	1.28148	0.660472	0.621007	up
ENSG00000102445	RUBCNL	protein_coding	-1.5014	-0.748923	-0.752479	down
ENSG00000102471	NDFIP2	protein_coding	1.46706	-0.0070465	1.47411	up
ENSG00000102524	TNFSF13B	protein_coding	-2.58212	-1.54143	-1.04069	down
ENSG00000102755	FLT1	protein_coding	1.58699	0.806176	0.780817	up
ENSG00000102760	RGCC	protein_coding	2.44552	1.62618	0.819344	up
ENSG00000102796	DHRS12	protein_coding	-2.47698	-1.87652	-0.600463	down
ENSG00000102837	OLFM4	protein_coding	4.36348	2.1283	2.23518	up
ENSG00000103056	SMPD3	protein_coding	-0.801302	0.484804	-1.28611	down
ENSG00000103066	PLA2G15	protein_coding	-0.841171	-0.199939	-0.641232	down
ENSG00000103175	WFDC1	protein_coding	2.81576	3.94055	-1.12479	down
ENSG00000103257	SLC7A5	protein_coding	3.23894	2.55197	0.686973	up
ENSG00000103313	MEFV	protein_coding	-1.6049	-0.952185	-0.652714	down
ENSG00000103316	CRYM	protein_coding	0.869559	1.8973	-1.02774	down
ENSG00000103355	PRSS33	protein_coding	-0.924409	1.36572	-2.29013	down
ENSG00000103381	CPPED1	protein_coding	-1.25746	-0.619389	-0.63807	down
ENSG00000103485	QPRT	protein_coding	2.81141	0.864637	1.94677	up
ENSG00000103569	AQP9	protein_coding	-2.09636	-1.50355	-0.592809	down
ENSG00000103647	CORO2B	protein_coding	2.09068	2.86078	-0.770105	down
ENSG00000104067	TJP1	protein_coding	2.43183	0.421237	2.01059	up
ENSG00000104290	FZD3	protein_coding	-0.25543	-0.928214	0.672784	up
ENSG00000104343	UBE2W	protein_coding	-1.26458	-0.439319	-0.825266	down
ENSG00000104413	ESRP1	protein_coding	3.37078	0.0716787	3.2991	up
ENSG00000104447	TRPS1	protein_coding	-1.31362	-0.563353	-0.750267	down
ENSG00000104490	NCALD	protein_coding	0.0661406	-0.874381	0.940521	up
ENSG00000104722	NEFM	protein_coding	-1.00066	-2.06893	1.06827	up
ENSG00000104723	TUSC3	protein_coding	4.95823	2.4726	2.48563	up
ENSG00000104738	MCM4	protein_coding	2.11825	1.25981	0.858442	up
ENSG00000104763	ASAH1	protein_coding	-1.36279	-0.714301	-0.648486	down
ENSG00000104881	PPP1R13L	protein_coding	1.68927	0.498592	1.19068	up
ENSG00000104918	RETN	protein_coding	3.02173	2.36641	0.655318	up
ENSG00000104953	TLE6	protein_coding	0.572356	1.39337	-0.821011	down
ENSG00000105048	TNNT1	protein_coding	0.00097499	0.873001	-0.872027	down
ENSG00000105137	SYDE1	protein_coding	7.91293	1.64798	6.26495	up
ENSG00000105146	AURKC	protein_coding	0.231808	1.03328	-0.801467	down
ENSG00000105205	CLC	protein_coding	-0.549613	2.12339	-2.673	down
ENSG00000105246	EBI3	protein_coding	6.11269	0.338171	5.77452	up
ENSG00000105281	SLC1A5	protein_coding	1.69556	1.0866	0.608962	up
ENSG00000105289	TJP3	protein_coding	-0.610063	-1.37853	0.768469	up
ENSG00000105357	MYH14	protein_coding	5.75926	2.9913	2.76796	up
ENSG00000105366	SIGLEC8	protein_coding	-0.843413	0.997243	-1.84066	down
ENSG00000105370	LIM2	protein_coding	0.989178	-1.49115	2.48033	up
ENSG00000105374	NKG7	protein_coding	-0.316402	-1.73209	1.41569	up
ENSG00000105376	ICAM5	protein_coding	-0.213549	0.642501	-0.856049	down
ENSG00000105383	CD33	protein_coding	-1.10053	-0.359029	-0.741501	down
ENSG00000105472	CLEC11A	protein_coding	2.12781	1.36652	0.761285	up
ENSG00000105492	SIGLEC6	protein_coding	0.108378	-1.00604	1.11442	up
ENSG00000105507	CABP5	protein_coding	-2.97045	-1.71347	-1.25698	down
ENSG00000105509	HAS1	protein_coding	-3.37819	-0.514579	-2.86361	down
ENSG00000105514	RAB3D	protein_coding	-1.59371	-0.822497	-0.771209	down
ENSG00000105609	LILRB5	protein_coding	-2.46104	-0.82075	-1.64029	down
ENSG00000105610	KLF1	protein_coding	2.50418	1.82735	0.676834	up
ENSG00000105642	KCNN1	protein_coding	3.189	5.41865	-2.22965	down
ENSG00000105711	SCN1B	protein_coding	-2.24426	-1.27557	-0.968682	down
ENSG00000105835	NAMPT	protein_coding	-2.42693	-1.58736	-0.839572	down
ENSG00000105894	PTN	protein_coding	6.04578	2.61497	3.43081	up
ENSG00000105948	TTC26	protein_coding	-1.87588	-0.981166	-0.894719	down
ENSG00000105974	CAV1	protein_coding	1.96288	0.308759	1.65412	up
ENSG00000105996	HOXA2	protein_coding	-2.82978	-0.651927	-2.17786	down
ENSG00000106070	GRB10	protein_coding	-1.10198	-0.091763	-1.01021	down
ENSG00000106077	ABHD11	protein_coding	0.850008	-0.389504	1.23951	up
ENSG00000106078	COBL	protein_coding	4.12879	0.571282	3.55751	up
ENSG00000106211	HSPB1	protein_coding	2.72031	1.1863	1.53402	up
ENSG00000106366	SERPINE1	protein_coding	2.59883	0.452328	2.1465	up
ENSG00000106571	GLI3	protein_coding	3.07576	-0.517577	3.59334	up
ENSG00000106714	CNTNAP3	protein_coding	-2.58669	-1.08963	-1.49706	down
ENSG00000106780	MEGF9	protein_coding	-1.76972	-1.12834	-0.641384	down
ENSG00000106853	PTGR1	protein_coding	0.636553	1.49789	-0.861335	down
ENSG00000106976	DNM1	protein_coding	-0.432962	0.793871	-1.22683	down
ENSG00000107018	RLN1	protein_coding	0.0925193	1.35659	-1.26407	down
ENSG00000107104	KANK1	protein_coding	0.243228	-0.835902	1.07913	up
ENSG00000107317	PTGDS	protein_coding	-0.250935	-2.26572	2.01479	up
ENSG00000107438	PDLIM1	protein_coding	-0.234068	0.685501	-0.919569	down
ENSG00000107447	DNTT	protein_coding	1.77913	2.95863	-1.17949	down
ENSG00000107719	PALD1	protein_coding	2.54719	1.6596	0.887585	up
ENSG00000107789	MINPP1	protein_coding	1.44408	0.642341	0.801735	up
ENSG00000107954	NEURL1	protein_coding	0.8108	-0.961056	1.77186	up
ENSG00000107968	MAP3K8	protein_coding	-1.30892	-0.684702	-0.62422	down
ENSG00000108106	UBE2S	protein_coding	1.25457	0.600964	0.653609	up
ENSG00000108244	KRT23	protein_coding	0.0561113	-0.576231	0.632342	up
ENSG00000108465	CDK5RAP3	protein_coding	-1.27649	-0.350313	-0.926179	down
ENSG00000108582	CPD	protein_coding	-1.98229	-1.10312	-0.879165	down
ENSG00000108590	MED31	protein_coding	-0.971531	-0.38073	-0.5908	down
ENSG00000108599	AKAP10	protein_coding	-0.854934	-0.263439	-0.591495	down
ENSG00000108622	ICAM2	protein_coding	0.259141	-0.371405	0.630546	up
ENSG00000108679	LGALS3BP	protein_coding	0.312813	-0.458387	0.7712	up
ENSG00000108788	MLX	protein_coding	-0.860027	-0.242961	-0.617066	down
ENSG00000108798	ABI3	protein_coding	-0.13171	-0.766587	0.634877	up
ENSG00000108821	COL1A1	protein_coding	4.37994	0.524766	3.85518	up
ENSG00000108823	SGCA	protein_coding	0.204557	1.10837	-0.90381	down
ENSG00000108846	ABCC3	protein_coding	-2.53103	-0.942551	-1.58848	down
ENSG00000108932	SLC16A6	protein_coding	-1.92182	-1.00297	-0.918848	down
ENSG00000108946	PRKAR1A	protein_coding	-1.26913	-0.644237	-0.624891	down
ENSG00000108950	FAM20A	protein_coding	-2.79017	-2.12059	-0.669581	down
ENSG00000108960	MMD	protein_coding	-0.822929	-0.13469	-0.688238	down
ENSG00000109046	WSB1	protein_coding	-1.4579	-0.82319	-0.634709	down
ENSG00000109079	TNFAIP1	protein_coding	0.386303	-0.235062	0.621365	up
ENSG00000109099	PMP22	protein_coding	-0.722772	0.804909	-1.52768	down
ENSG00000109118	PHF12	protein_coding	-1.33512	-0.739332	-0.595787	down
ENSG00000109189	USP46	protein_coding	0.682244	-0.666686	1.34893	up
ENSG00000109265	CRACD	protein_coding	1.7888	1.04044	0.748364	up
ENSG00000109272	PF4V1	protein_coding	-2.24385	0.081114	-2.32496	down
ENSG00000109381	ELF2	protein_coding	-1.10323	-0.482043	-0.621187	down
ENSG00000109466	KLHL2	protein_coding	-2.02159	-1.03273	-0.988857	down
ENSG00000109674	NEIL3	protein_coding	3.0043	1.80633	1.19797	up
ENSG00000109805	NCAPG	protein_coding	2.9906	1.60578	1.38482	up
ENSG00000109819	PPARGC1A	protein_coding	0.569127	2.59598	-2.02686	down
ENSG00000109881	CCDC34	protein_coding	1.57884	0.742317	0.836524	up
ENSG00000109906	ZBTB16	protein_coding	0.356897	-0.676959	1.03386	up
ENSG00000109944	JHY	protein_coding	0.314256	-0.923129	1.23738	up
ENSG00000109956	B3GAT1	protein_coding	-4.05134	-6.79642	2.74508	up
ENSG00000109971	HSPA8	protein_coding	0.430178	-0.164004	0.594182	up
ENSG00000110002	VWA5A	protein_coding	0.254006	-0.42672	0.680726	up
ENSG00000110013	SIAE	protein_coding	-0.161988	0.684872	-0.84686	down
ENSG00000110076	NRXN2	protein_coding	0.318336	-0.985528	1.30386	up
ENSG00000110077	MS4A6A	protein_coding	-1.04143	-0.322743	-0.718683	down
ENSG00000110315	RNF141	protein_coding	-1.74259	-0.877519	-0.865066	down
ENSG00000110328	GALNT18	protein_coding	3.7064	2.41579	1.29062	up
ENSG00000110422	HIPK3	protein_coding	-1.1949	-0.409458	-0.785443	down
ENSG00000110492	MDK	protein_coding	1.48509	0.503962	0.981127	up
ENSG00000110693	SOX6	protein_coding	3.90347	3.19751	0.70596	up
ENSG00000110717	NDUFS8	protein_coding	0.858096	0.195329	0.662768	up
ENSG00000110848	CD69	protein_coding	-0.0515498	-0.691085	0.639535	up
[truncated: 2,123 more rows]

## Sheet: Table S9
Table S9. List of genes in HEU cord blood-associated modules in WGCNA.
[truncated: 722 more rows]

[truncated: 1 more sheets: Table S10]
